# Supplementary material for: Renal interstitial cells promote nephron regeneration by secreting prostaglandin E2
Source: eLife. 2023 Jan 16;12:e81438. doi: 10.7554/eLife.81438 (PMC9943066; doi:10.7554/eLife.81438)
Supplement: Figure 1—source data 1. [file elife-81438-fig1-data1.xlsx]

## Sheet: Cluster 12
	p_val	avg_log2FC	pct.1	pct.2	p_val_adj	gene
LOC798694	0	3.06769	0.523	0.006	0	LOC798694
col1a2	0	3.00712	0.532	0.002	0	col1a2
edil3a	0	3.00622	0.505	0.005	0	edil3a
col6a4a	0	2.88265	0.468	0.003	0	col6a4a
cyp1c2	9.83876e-300	2.55232	0.394	0.001	2.21392e-295	cyp1c2
col1a1b	1.07015e-273	2.30418	0.385	0.002	2.40806e-269	col1a1b
cdh11	5.71591e-273	2.711	0.468	0.006	1.28619e-268	cdh11
spon1b	1.65455e-240	1.97031	0.358	0.002	3.72306e-236	spon1b
col6a1	3.18366e-238	1.99272	0.349	0.002	7.16386e-234	col6a1
mfap5	1.49275e-236	1.90375	0.294	0	3.35899e-232	mfap5
ccl25b	1.28968e-234	5.21688	0.688	0.029	2.90204e-230	ccl25b
si:ch1073-459j12.1	4.37771e-222	1.95399	0.385	0.005	9.85073e-218	si:ch1073-459j12.1
emilin1a	2.19828e-220	1.72292	0.339	0.003	4.94656e-216	emilin1a
pcdh10b	4.76201e-214	1.61662	0.275	0.001	1.07155e-209	pcdh10b
nr1h5	5.92486e-213	1.83149	0.33	0.003	1.33321e-208	nr1h5
col6a2	1.29744e-206	1.55995	0.266	0.001	2.9195e-202	col6a2
wu:fj16a03	7.27716e-201	4.03602	0.514	0.016	1.63751e-196	wu:fj16a03
sfrp5	8.37315e-197	1.82289	0.321	0.003	1.88413e-192	sfrp5
plp1b	9.87095e-194	2.36029	0.358	0.005	2.22116e-189	plp1b
ncam1a	2.62495e-188	2.09373	0.376	0.007	5.90667e-184	ncam1a
LOC100333499	4.61225e-181	1.55621	0.312	0.004	1.03785e-176	LOC100333499
colec12	2.91204e-179	1.433	0.275	0.002	6.55267e-175	colec12
c7a	6.63373e-172	2.90615	0.404	0.011	1.49272e-167	c7a
rbp4	1.47707e-167	3.86997	0.514	0.022	3.32371e-163	rbp4
postnb	4.09211e-167	1.94221	0.266	0.002	9.20806e-163	postnb
col5a1	4.4804e-167	2.23105	0.312	0.005	1.00818e-162	col5a1
dcn	3.8722e-160	1.7043	0.257	0.002	8.71322e-156	dcn
ifitm1	5.49756e-152	3.34641	0.385	0.012	1.23706e-147	ifitm1
rbpms2b	2.11493e-144	2.19855	0.385	0.013	4.75901e-140	rbpms2b
tagln	2.77942e-140	2.14987	0.266	0.004	6.25425e-136	tagln
bicc1b	4.87687e-135	1.75726	0.284	0.006	1.09739e-130	bicc1b
sema4ba	2.85898e-127	1.86378	0.321	0.01	6.43327e-123	sema4ba
mxra8a	4.22921e-119	1.26511	0.257	0.006	9.51656e-115	mxra8a
ptprsa	1.71279e-117	1.71508	0.33	0.012	3.85411e-113	ptprsa
hoxc6b	6.86751e-115	2.23936	0.275	0.007	1.54533e-110	hoxc6b
lrp1aa	6.6176e-111	1.96024	0.303	0.01	1.48909e-106	lrp1aa
cygb1	2.10343e-106	2.0789	0.303	0.011	4.73313e-102	cygb1
fabp10a	1.24754e-99	2.61489	0.349	0.018	2.80721e-95	fabp10a
coro2ba	5.22784e-97	1.3392	0.284	0.011	1.17637e-92	coro2ba
LOC100536923	5.60703e-97	1.30466	0.284	0.011	1.26169e-92	LOC100536923
fhl3b	6.66608e-95	1.88818	0.33	0.016	1.5e-90	fhl3b
plxna4	5.14437e-90	1.708	0.312	0.015	1.15759e-85	plxna4
LOC100537860	3.41543e-83	2.13646	0.459	0.041	7.68541e-79	LOC100537860
itga9	2.19723e-80	1.37413	0.266	0.012	4.94421e-76	itga9
agrn	7.55319e-79	2.36621	0.495	0.054	1.69962e-74	agrn
nr2f2	3.13742e-78	2.42708	0.532	0.063	7.05983e-74	nr2f2
mylka	2.4755e-75	2.04242	0.431	0.041	5.57037e-71	mylka
pcolcea	3.32155e-75	1.769	0.294	0.017	7.47416e-71	pcolcea
loxl2b	4.04683e-71	2.48899	0.385	0.035	9.10617e-67	loxl2b
cyp2ad3	6.15996e-71	2.19148	0.404	0.038	1.38611e-66	cyp2ad3
hoxb3a	2.90164e-65	1.52546	0.33	0.027	6.52927e-61	hoxb3a
f3b	2.91635e-65	1.40452	0.275	0.018	6.56237e-61	f3b
rbpms2a1	1.12381e-62	2.58015	0.541	0.082	2.5288e-58	rbpms2a
lrp1ab	6.62008e-61	1.89019	0.339	0.031	1.48965e-56	lrp1ab
nt5c2b	1.48866e-58	1.4575	0.275	0.02	3.34979e-54	nt5c2b
cldn11a1	4.41184e-56	2.32414	0.404	0.05	9.92752e-52	cldn11a
fhl2a	2.51801e-55	2.24786	0.339	0.035	5.66602e-51	fhl2a
mmp2	6.78407e-53	1.77924	0.358	0.04	1.52655e-48	mmp2
myl9a	8.00738e-53	1.20523	0.284	0.024	1.80182e-48	myl9a
fgfr2	3.29625e-48	1.58511	0.266	0.024	7.41722e-44	fgfr2
sparc	9.41683e-47	1.14972	0.312	0.033	2.11898e-42	sparc
si:dkey-8k3.2	7.25503e-46	2.75159	0.44	0.077	1.63253e-41	si:dkey-8k3.2
rgs5b	1.85779e-45	1.8691	0.321	0.037	4.18039e-41	rgs5b
cldn5a	4.52094e-44	1.13846	0.257	0.024	1.0173e-39	cldn5a
tead3a	2.45279e-43	1.60285	0.275	0.029	5.51926e-39	tead3a
rbms31	2.72036e-43	1.72426	0.495	0.094	6.12135e-39	rbms3
pawr	9.05494e-43	1.09357	0.294	0.033	2.03754e-38	pawr
pde3a	8.62133e-42	1.10602	0.257	0.025	1.93997e-37	pde3a
krt94	1.7705e-41	2.20096	0.44	0.078	3.98397e-37	krt94
col18a1a	1.09774e-40	1.65378	0.312	0.039	2.47014e-36	col18a1a
pkp3b	1.3478e-38	1.41151	0.349	0.053	3.03281e-34	pkp3b
cnn3a1	1.46591e-37	1.825	0.495	0.107	3.2986e-33	cnn3a
tns1b1	4.04379e-36	1.50333	0.45	0.09	9.09933e-32	tns1b
dpyda.1	6.68989e-36	1.20715	0.275	0.035	1.50536e-31	dpyda.1
snai2	3.2983e-35	1.21035	0.266	0.033	7.42182e-31	snai2
akap12b	2.04485e-34	1.23495	0.257	0.031	4.60133e-30	akap12b
myl9b1	1.86323e-33	1.67153	0.358	0.064	4.19263e-29	myl9b
mob2a	2.55351e-32	1.48378	0.33	0.056	5.7459e-28	mob2a
cald1a1	8.5001e-32	1.54846	0.367	0.069	1.91269e-27	cald1a
plpp31	1.53461e-30	1.89259	0.459	0.108	3.45318e-26	plpp3
tfpia	9.20977e-30	1.48629	0.312	0.053	2.07238e-25	tfpia
hspb1	1.04949e-29	1.42588	0.284	0.045	2.36157e-25	hspb1
nfia1	8.40339e-29	1.48573	0.413	0.094	1.89093e-24	nfia
pleca	1.59104e-28	1.14288	0.33	0.061	3.58015e-24	pleca
zfp36l1b1	1.0161e-27	1.92264	0.661	0.277	2.28642e-23	zfp36l1b
c4	2.28488e-27	2.11942	0.367	0.081	5.14144e-23	c4
sox4a	7.40455e-27	1.8497	0.376	0.086	1.66617e-22	sox4a
zgc:1584632	1.40028e-26	1.31703	1	1	3.15091e-22	zgc:158463
grb10b	3.50345e-24	1.66762	0.275	0.051	7.88346e-20	grb10b
tshz21	4.00355e-24	1.12325	0.284	0.053	9.00879e-20	tshz2
fstl1b1	1.43536e-23	1.50482	0.422	0.114	3.22985e-19	fstl1b
arhgef5	1.84084e-23	1.76601	0.385	0.103	4.14225e-19	arhgef5
anxa1a1	2.28367e-23	1.67811	0.404	0.107	5.13871e-19	anxa1a
zgc:66433	6.48924e-23	0.866311	0.266	0.048	1.46021e-18	zgc:66433
nav3	1.29771e-22	1.22024	0.294	0.059	2.92012e-18	nav3
thrb	1.69979e-22	1.08537	0.312	0.067	3.82486e-18	thrb
mt-rnr23	2.52155e-22	1.3133	1	0.993	5.67398e-18	mt-rnr2
mprip	2.97827e-22	1.09511	0.303	0.064	6.7017e-18	mprip
si:ch211-198c19.3	3.42656e-22	2.30689	0.321	0.072	7.71045e-18	si:ch211-198c19.3
rbfox2	4.29382e-22	1.30084	0.339	0.081	9.66195e-18	rbfox2
ccnf	7.28974e-21	1.32645	0.257	0.05	1.64034e-16	ccnf
myo10l31	1.59537e-20	1.06977	0.312	0.071	3.58989e-16	myo10l3
si:ch1073-291c23.21	6.12523e-20	1.10085	0.358	0.093	1.3783e-15	si:ch1073-291c23.2
LOC100004299	7.49757e-19	1.235	0.312	0.078	1.6871e-14	LOC100004299
myh11a2	1.28249e-18	1.41476	0.404	0.125	2.88586e-14	myh11a
krt911	1.82181e-18	0.62109	0.266	0.056	4.09943e-14	krt91
mt-rnr12	2.33219e-17	1.48499	0.963	0.915	5.24789e-13	mt-rnr1
LOC1104384392	1.58232e-16	1.00178	0.917	0.828	3.56053e-12	LOC110438439
sik2b	3.3875e-16	0.985657	0.257	0.062	7.62255e-12	sik2b
col4a21	6.3551e-16	1.20442	0.312	0.087	1.43003e-11	col4a2
mtss1la1	8.11906e-16	1.63133	0.339	0.108	1.82695e-11	mtss1la
cebpd3	1.16111e-15	1.4714	0.541	0.241	2.61272e-11	cebpd
LOC101886390	3.18045e-15	0.80292	0.266	0.069	7.15664e-11	LOC101886390
itgb1a1	3.85904e-15	0.828053	0.257	0.064	8.6836e-11	itgb1a
ednraa1	3.94474e-15	0.96133	0.349	0.107	8.87645e-11	ednraa
rasgef1ba	1.37314e-14	1.25172	0.284	0.082	3.08983e-10	rasgef1ba
zmp:00000007221	1.63779e-14	0.948541	0.33	0.098	3.68535e-10	zmp:0000000722
rnf38	1.1641e-13	1.20574	0.33	0.11	2.61946e-09	rnf38
dlc11	1.36058e-13	0.937907	0.33	0.103	3.06158e-09	dlc1
gpatch81	2.43412e-13	1.42867	0.532	0.275	5.47726e-09	gpatch8
cxcl12a2	4.04957e-13	0.549867	0.835	0.479	9.11234e-09	cxcl12a
dedd12	1.99698e-12	1.71351	0.661	0.47	4.49361e-08	dedd1
ahnak2	3.08984e-12	1.34076	0.633	0.386	6.95276e-08	ahnak
sptbn11	3.4318e-12	0.998737	0.477	0.217	7.72224e-08	sptbn1
fermt21	3.5837e-12	1.08195	0.367	0.146	8.06404e-08	fermt2
nktr1	5.02357e-12	1.29402	0.367	0.144	1.1304e-07	nktr
tmem1762	7.42542e-12	0.714213	0.431	0.163	1.67087e-07	tmem176
arvcfb1	1.07948e-11	1.47855	0.33	0.127	2.42904e-07	arvcfb
si:dkeyp-94b4.11	1.87286e-11	0.753123	0.321	0.112	4.21431e-07	si:dkeyp-94b4.1
clk4a1	3.04447e-11	1.16147	0.477	0.236	6.85067e-07	clk4a
fbn11	3.19624e-11	0.854558	0.275	0.087	7.19219e-07	fbn1
slco2b12	7.2478e-11	0.950793	0.468	0.212	1.6309e-06	slco2b1
eppk11	7.97092e-11	0.682221	0.321	0.111	1.79362e-06	eppk1
dysf1	1.77017e-10	0.616638	0.266	0.085	3.98323e-06	dysf
cxcl8b.11	2.17236e-10	1.90173	0.294	0.105	4.88824e-06	cxcl8b.1
antxr2a1	4.00433e-10	1.1063	0.376	0.17	9.01053e-06	antxr2a
ecm1b	4.24218e-10	1.06491	0.321	0.127	9.54575e-06	ecm1b
abca3b1	7.8731e-10	1.49184	0.367	0.17	1.7716e-05	abca3b
ramp21	1.11858e-09	1.17982	0.312	0.121	2.51704e-05	ramp2
foxo1a1	1.87985e-09	1.15625	0.404	0.193	4.23005e-05	foxo1a
anxa2a1	3.50682e-09	1.21673	0.294	0.114	7.89105e-05	anxa2a
si:ch73-138n13.11	1.05678e-08	0.70978	0.294	0.113	0.000237797	si:ch73-138n13.1
fzd41	1.20326e-08	0.479028	0.266	0.094	0.000270757	fzd4
kmt2cb1	1.71575e-08	1.08714	0.367	0.18	0.000386079	kmt2cb
ogt.11	1.98959e-08	0.963046	0.486	0.276	0.000447697	ogt.1
ogt.21	2.37257e-08	0.803899	0.349	0.16	0.000533876	ogt.2
si:ch211-204c21.11	2.78901e-08	0.896057	0.294	0.121	0.000627582	si:ch211-204c21.1
si:dkey-163m14.21	7.53038e-08	0.271826	0.275	0.102	0.00169449	si:dkey-163m14.2
myo18ab	9.45762e-08	0.730532	0.284	0.12	0.00212815	myo18ab
nrp1a1	1.78512e-07	0.706158	0.459	0.255	0.00401687	nrp1a
aoc2.11	3.97786e-07	1.13455	0.284	0.129	0.00895097	aoc2.1
s100a10b2	6.32736e-07	0.938895	0.56	0.383	0.0142378	s100a10b
add3a2	1.10462e-06	1.1721	0.459	0.289	0.0248561	add3a
zfhx31	1.55424e-06	0.754892	0.367	0.2	0.0349735	zfhx3
pank21	1.7403e-06	0.505093	0.367	0.187	0.0391603	pank2
itpkcb1	2.5425e-06	0.811271	0.266	0.12	0.0572113	itpkcb
sh3pxd2aa2	2.68525e-06	0.517696	0.312	0.142	0.0604234	sh3pxd2aa
cux1a1	2.90161e-06	0.73728	0.303	0.147	0.0652921	cux1a
tagln22	3.15977e-06	0.720819	0.45	0.269	0.0711011	tagln2
pnpla6	3.24795e-06	0.884604	0.284	0.138	0.0730854	pnpla6
rxraa2	4.88054e-06	1.11094	0.44	0.282	0.109822	rxraa
mast41	4.97624e-06	0.813513	0.266	0.126	0.111975	mast4
krt82	6.15069e-06	0.697447	0.688	0.536	0.138403	krt8
zgc:77517.1	6.63859e-06	0.582474	0.275	0.129	0.149381	zgc:77517.1
luc7l3	8.68758e-06	0.803162	0.275	0.138	0.195488	luc7l3
mmp14b.11	8.84159e-06	0.649842	0.312	0.159	0.198953	mmp14b.1
tcf121	1.36769e-05	0.569853	0.266	0.126	0.307757	tcf12
gse11	1.66966e-05	0.397903	0.275	0.13	0.375707	gse1
si:ch211-108d22.21	1.84779e-05	0.832315	0.349	0.198	0.415789	si:ch211-108d22.2
LOC1005354281	3.3905e-05	0.927716	0.358	0.217	0.762931	LOC100535428
arhgap51	3.49425e-05	0.807638	0.312	0.176	0.786276	arhgap5
chd31	4.82482e-05	0.585546	0.303	0.164	1	chd3
fam168a	5.13585e-05	0.957038	0.284	0.159	1	fam168a
LOC7961801	5.17514e-05	0.60365	0.266	0.136	1	LOC796180
rapgef5a2	5.32342e-05	0.591169	0.275	0.134	1	rapgef5a
zfand5a1	5.53085e-05	0.647705	0.275	0.148	1	zfand5a
anks1b1	6.12526e-05	0.4131	0.284	0.145	1	anks1b
pfn2l1	6.31337e-05	0.584421	0.33	0.188	1	pfn2l
tnrc181	7.31361e-05	0.99181	0.339	0.212	1	tnrc18
pros11	0.000109754	0.507633	0.312	0.171	1	pros1
jmjd1cb1	0.000136156	0.543159	0.294	0.167	1	jmjd1cb
srsf5b	0.00013664	0.493379	0.266	0.142	1	srsf5b
ctnnb12	0.000139329	0.596094	0.422	0.279	1	ctnnb1
si:dkey-156n14.5.11	0.000143838	0.708238	0.358	0.223	1	si:dkey-156n14.5.1
nfil3-62	0.000148221	0.831277	0.321	0.191	1	nfil3-6
snx172	0.000174475	1.05541	0.385	0.272	1	snx17
wu:fb16f032	0.000179204	0.862861	0.413	0.289	1	wu:fb16f03
gas62	0.000180875	0.545028	0.376	0.227	1	gas6
lifrb1	0.000228519	0.635546	0.275	0.151	1	lifrb
nr2f52	0.000235234	0.398128	0.312	0.165	1	nr2f5
arrdc3a2	0.00025351	0.557072	0.422	0.281	1	arrdc3a
marcksl1a1	0.00029194	0.664388	0.798	0.663	1	marcksl1a
zgc:77517	0.000327169	0.919076	0.284	0.166	1	zgc:77517
grn24	0.000385409	0.607236	0.826	0.746	1	grn2
snrnp702	0.000430773	0.82661	0.358	0.248	1	snrnp70
marcksl1b2	0.000447677	0.545025	0.459	0.321	1	marcksl1b
rsrp11	0.000493339	0.799108	0.422	0.294	1	rsrp1
ulk21	0.000580399	0.550672	0.303	0.183	1	ulk2
jpt1b2	0.000609418	0.529228	0.339	0.215	1	jpt1b
arhgef1a1	0.000617317	0.706542	0.275	0.161	1	arhgef1a
srrm12	0.000648332	0.518049	0.56	0.45	1	srrm1
rbp51	0.000759138	0.774355	0.303	0.193	1	rbp5
cast1	0.000851652	0.491451	0.312	0.194	1	cast
zc3h11a1	0.00111871	0.514499	0.486	0.364	1	zc3h11a
stat1b1	0.00125575	1.03991	0.367	0.258	1	stat1b
vdrb1	0.00132281	0.744704	0.303	0.188	1	vdrb
fnbp4	0.00140488	0.692913	0.257	0.156	1	fnbp4
sltm2	0.00145753	0.501175	0.358	0.242	1	sltm
srsf1b1	0.00161249	0.473041	0.275	0.169	1	srsf1b
wsb12	0.00176562	0.688382	0.45	0.342	1	wsb1
dbn12	0.00176827	0.73174	0.312	0.206	1	dbn1
mknk2a1	0.00178303	0.304403	0.257	0.148	1	mknk2a
znf3181	0.00206453	0.405539	0.284	0.177	1	znf318
gna12a1	0.00209429	0.747945	0.294	0.193	1	gna12a
appa2	0.0022068	0.518463	0.321	0.207	1	appa
ddx51	0.00221643	0.687898	0.569	0.516	1	ddx5
midn2	0.00227905	1.04573	0.358	0.264	1	midn
cnn21	0.00231259	0.820707	0.459	0.381	1	cnn2
syncrip3	0.00233518	0.536702	0.541	0.463	1	syncrip
cd81a2	0.0023821	0.473185	0.56	0.47	1	cd81a
rbmx	0.0025722	0.711857	0.294	0.195	1	rbmx
akap8l1	0.00271156	0.801648	0.321	0.217	1	akap8l
LOC1018844512	0.002743	0.738871	0.339	0.236	1	LOC101884451
hspa5	0.00286076	0.688918	0.294	0.195	1	hspa5
leng81	0.00323801	0.356135	0.303	0.193	1	leng8
LOC1039108711	0.00334337	0.392436	0.385	0.28	1	LOC103910871
arglu1a2	0.00411713	0.361567	0.404	0.291	1	arglu1a
crebzf2	0.00428216	0.53509	0.394	0.297	1	crebzf
cyp3c11	0.00429495	0.505192	0.404	0.3	1	cyp3c1
pim11	0.00448146	0.702479	0.413	0.323	1	pim1
LOC1003316391	0.00485829	0.802358	0.358	0.284	1	LOC100331639
skia	0.00489323	0.934911	0.266	0.185	1	skia
eif4ebp3l2	0.00530599	0.299543	0.321	0.213	1	eif4ebp3l
mcl1b2	0.00576787	0.580152	0.477	0.391	1	mcl1b
srsf112	0.0062813	0.439292	0.358	0.256	1	srsf11
lxn2	0.00689493	0.538919	0.349	0.249	1	lxn
zfp36l1a1	0.00803289	0.791397	0.569	0.53	1	zfp36l1a

## Sheet: macrophages
	p_val	avg_log2FC	pct.1	pct.2	p_val_adj	gene
LOC103911722	0	3.02288	0.991	0.33	0	LOC103911722
marco	0	2.80032	1	0.652	0	marco
LOC101882781	0	2.54898	0.928	0.179	0	LOC101882781
si:dkey-5n18.1	0	2.46175	0.975	0.375	0	si:dkey-5n18.1
LOC797571	0	2.44834	0.982	0.342	0	LOC797571
si:zfos-2330d3.3	0	2.359	0.948	0.235	0	si:zfos-2330d3.3
slc40a1	0	2.34109	0.977	0.377	0	slc40a1
si:ch211-283g2.2	0	2.31928	0.933	0.168	0	si:ch211-283g2.2
havcr1	0	2.31142	0.989	0.384	0	havcr1
grna	0	2.21262	0.985	0.477	0	grna
ctsba	0	2.19744	1	0.719	0	ctsba
tmem59l	0	2.11102	0.869	0.116	0	tmem59l
itgae.1	0	2.00228	0.867	0.123	0	itgae.1
zgc:64065	0	1.88492	0.74	0.076	0	zgc:64065
nr1h3	0	1.86469	0.89	0.195	0	nr1h3
illr1	0	1.74891	0.785	0.094	0	illr1
tspan33a	0	1.74674	0.858	0.153	0	tspan33a
pard3ba	0	1.47987	0.748	0.087	0	pard3ba
LOC570021	0	1.44808	0.588	0.042	0	LOC570021
sema7a	0	1.4445	0.679	0.05	0	sema7a
si:ch211-207g17.2	0	1.30467	0.627	0.052	0	si:ch211-207g17.2
tpp1	2.02009e-306	2.08511	0.957	0.325	4.54561e-302	tpp1
tnfsf10	3.09934e-300	1.73292	0.855	0.17	6.97413e-296	tnfsf10
cfp	9.80137e-300	2.02751	0.898	0.219	2.2055e-295	cfp
p2ry13	1.30737e-296	1.33054	0.731	0.096	2.94183e-292	p2ry13
ctsk	9.62528e-286	2.04845	0.944	0.311	2.16588e-281	ctsk
si:ch211-194m7.4	2.66034e-284	2.16762	0.97	0.336	5.98629e-280	si:ch211-194m7.4
si:dkey-56f14.7	2.12277e-280	1.15089	0.746	0.106	4.77666e-276	si:dkey-56f14.7
psap	3.44187e-280	1.96554	0.982	0.563	7.74489e-276	psap
mafaa	1.23663e-279	1.38132	0.564	0.045	2.78267e-275	mafaa
adap2	4.64265e-279	1.32309	0.693	0.09	1.04469e-274	adap2
mfap4	1.79098e-277	2.16053	0.976	0.354	4.03007e-273	mfap4
paox1	1.60993e-276	1.33683	0.794	0.132	3.62267e-272	paox1
cmklr1	4.18847e-276	1.83478	0.96	0.307	9.4249e-272	cmklr1
exoc3l4	4.16942e-275	1.17154	0.593	0.06	9.38204e-271	exoc3l4
ctnnbip1	6.15232e-272	1.47779	0.729	0.115	1.38439e-267	ctnnbip1
ptprja	2.04538e-271	1.26263	0.695	0.097	4.60252e-267	ptprja
susd1	4.02052e-271	1.46659	0.689	0.096	9.04698e-267	susd1
cd82a	1.38736e-262	1.32519	0.78	0.137	3.12184e-258	cd82a
fcer1g	9.6659e-262	1.58204	0.829	0.175	2.17502e-257	fcer1g
LOC108179692	1.00493e-261	1.4673	0.827	0.179	2.2613e-257	LOC108179692
zgc:174904	2.88421e-260	1.83631	0.958	0.324	6.49004e-256	zgc:174904
spi1a	1.77782e-259	1.45077	0.842	0.18	4.00045e-255	spi1a
zgc:64065.1	2.28401e-258	1.61027	0.607	0.07	5.13948e-254	zgc:64065.1
dnase2	5.30769e-257	1.38452	0.845	0.177	1.19434e-252	dnase2
fgl2a	1.44911e-256	1.66202	0.947	0.305	3.26079e-252	fgl2a
si:ch211-283g2.2.1	2.92074e-253	1.28831	0.573	0.059	6.57226e-249	si:ch211-283g2.2.1
fuca1.1	1.57659e-251	1.4774	0.833	0.189	3.54765e-247	fuca1.1
npc2	1.8266e-248	1.80964	0.989	0.625	4.11021e-244	npc2
il10ra	6.16541e-248	1.23213	0.771	0.141	1.38734e-243	il10ra
si:ch211-212k18.7.1	7.61887e-248	1.77015	0.958	0.476	1.7144e-243	si:ch211-212k18.7.1
wdfy3	1.5914e-247	1.08236	0.673	0.101	3.58097e-243	wdfy3
c5ar1	1.86363e-247	1.15821	0.655	0.095	4.19353e-243	c5ar1
slc29a1b	2.51858e-247	1.00102	0.451	0.025	5.66731e-243	slc29a1b
ctsc	1.59827e-246	1.79842	0.954	0.422	3.59642e-242	ctsc
tcirg1b	2.53288e-246	1.17421	0.661	0.098	5.69949e-242	tcirg1b
si:ch1073-278o19.1	4.1451e-245	1.14865	0.702	0.115	9.3273e-241	si:ch1073-278o19.1
slc37a2	3.59662e-244	1.26336	0.783	0.154	8.09312e-240	slc37a2
rnaset2	7.42535e-244	1.90481	0.928	0.37	1.67085e-239	rnaset2
ptprdb	1.29239e-239	0.979934	0.464	0.032	2.90814e-235	ptprdb
zgc:152830	1.79174e-233	1.26529	0.791	0.174	4.03177e-229	zgc:152830
LOC560447.1	2.2623e-233	1.14911	0.518	0.052	5.09064e-229	LOC560447.1
csf1ra	3.68125e-232	0.880136	0.52	0.051	8.28355e-228	csf1ra
lygl1	5.5718e-232	1.7561	0.982	0.526	1.25377e-227	lygl1
LOC100331045	1.41153e-231	1.14639	0.625	0.091	3.17622e-227	LOC100331045
si:ch211-243a20.4	1.45805e-231	1.25236	0.799	0.171	3.28089e-227	si:ch211-243a20.4
si:dkey-71h2.2	6.73825e-229	0.904563	0.437	0.028	1.51624e-224	si:dkey-71h2.2
lgals2a	7.65146e-228	1.73937	0.938	0.398	1.72173e-223	lgals2a
LOC101885796	1.91165e-226	0.76065	0.398	0.019	4.3016e-222	LOC101885796
fabp7b	9.82218e-226	1.28679	0.685	0.117	2.21019e-221	fabp7b
me1	1.60303e-225	1.24235	0.645	0.102	3.60713e-221	me1
ctsa	1.02953e-224	1.53818	0.937	0.351	2.31664e-220	ctsa
zgc:173915	1.97746e-224	2.44768	0.871	0.273	4.44969e-220	zgc:173915
ms4a17a.10	3.73133e-223	1.63186	0.919	0.317	8.39624e-219	ms4a17a.10
si:dkey-188i13.6	2.21066e-221	1.43164	0.836	0.213	4.97444e-217	si:dkey-188i13.6
ctss2.2	6.04507e-221	1.57298	0.979	0.471	1.36026e-216	ctss2.2
si:ch73-236c18.7	6.60978e-220	0.875661	0.599	0.082	1.48733e-215	si:ch73-236c18.7
abcc3	1.63686e-219	1.07993	0.777	0.166	3.68327e-215	abcc3
mpeg1.2	3.09689e-219	1.01736	0.48	0.045	6.96862e-215	mpeg1.2
rbp5	7.80915e-217	1.28347	0.603	0.092	1.75722e-212	rbp5
slc23a2.1	1.04865e-216	0.955664	0.53	0.063	2.35967e-212	slc23a2.1
irf7	3.64747e-215	1.2699	0.642	0.113	8.20755e-211	irf7
pstpip2	3.07676e-214	1.06404	0.733	0.148	6.92332e-210	pstpip2
si:ch211-240b21.4	5.24145e-212	0.864676	0.411	0.027	1.17943e-207	si:ch211-240b21.4
zgc:92066	6.87259e-212	2.18441	1	0.97	1.54647e-207	zgc:92066
fxyd6l	6.36953e-210	1.44102	0.81	0.216	1.43327e-205	fxyd6l
hsd17b14	7.85222e-209	1.06808	0.669	0.123	1.76691e-204	hsd17b14
snx10b	3.29447e-206	0.844886	0.55	0.074	7.41322e-202	snx10b
illr3	2.61624e-205	0.745857	0.393	0.025	5.88706e-201	illr3
ucp2	1.37751e-204	1.83654	0.98	0.585	3.09968e-200	ucp2
si:ch73-237c6.1	1.8448e-204	1.01782	0.589	0.092	4.15117e-200	si:ch73-237c6.1
slc45a4	9.95788e-204	0.812406	0.535	0.07	2.24072e-199	slc45a4
zmp:0000000936	2.49509e-202	0.951349	0.607	0.101	5.61446e-198	zmp:0000000936
si:ch211-212k18.7	3.51881e-202	0.78249	0.497	0.058	7.91803e-198	si:ch211-212k18.7
chl1a	5.08858e-201	1.0119	0.392	0.026	1.14503e-196	chl1a
slc15a4	3.01546e-200	0.785923	0.628	0.107	6.78538e-196	slc15a4
si:ch73-267c23.10	3.75104e-200	0.835456	0.489	0.056	8.44059e-196	si:ch73-267c23.10
LOC101886073.1	3.32724e-199	1.0248	0.582	0.096	7.48696e-195	LOC101886073.1
zgc:153184	1.55434e-198	0.906278	0.612	0.104	3.49759e-194	zgc:153184
cox6a2.1	1.63333e-198	1.2285	0.789	0.201	3.67531e-194	cox6a2.1
LOC103911540	2.05144e-198	1.56806	0.965	0.495	4.61616e-194	LOC103911540
si:ch211-117m20.5	2.27572e-198	1.72369	0.928	0.35	5.12082e-194	si:ch211-117m20.5
zgc:123107	2.6066e-198	0.995507	0.636	0.112	5.86538e-194	zgc:123107
LOC562630	6.80081e-198	0.93081	0.473	0.051	1.53032e-193	LOC562630
itgb4	9.52987e-198	0.867145	0.425	0.038	2.14441e-193	itgb4
LOC110439038	8.48345e-196	0.946637	0.501	0.062	1.90895e-191	LOC110439038
sftpbb	4.18147e-194	0.968216	0.551	0.082	9.40914e-190	sftpbb
ctss2.1	4.20204e-194	2.47857	0.965	0.494	9.45544e-190	ctss2.1
fam26f	6.2676e-194	0.725916	0.512	0.066	1.41033e-189	fam26f
lyn	6.33124e-194	1.09521	0.814	0.218	1.42466e-189	lyn
dpp7	6.54665e-194	1.14643	0.819	0.215	1.47313e-189	dpp7
si:zfos-741a10.3	1.74163e-193	1.09759	0.666	0.135	3.91901e-189	si:zfos-741a10.3
LOC101882480	3.71395e-192	1.18704	0.436	0.043	8.35713e-188	LOC101882480
bmt2	1.00529e-191	0.796538	0.588	0.099	2.26211e-187	bmt2
atp6v0ca	2.16245e-191	1.3647	0.982	0.631	4.86594e-187	atp6v0ca
irf8	3.8088e-191	1.11788	0.832	0.22	8.57056e-187	irf8
tmem173	1.9305e-189	0.80455	0.496	0.063	4.34401e-185	tmem173
ehd1a	5.02103e-189	1.17223	0.832	0.25	1.12983e-184	ehd1a
xcr1a.1	2.18208e-188	0.810224	0.406	0.034	4.91011e-184	xcr1a.1
stoml3b	2.33525e-188	1.07596	0.617	0.114	5.25477e-184	stoml3b
unm-sa911	2.59382e-188	0.854381	0.632	0.122	5.83662e-184	unm-sa911
hmox1a	1.04536e-187	2.63002	0.975	0.494	2.35226e-183	hmox1a
wdfy4	1.43511e-187	0.805203	0.583	0.097	3.22928e-183	wdfy4
LOC795887	5.19837e-187	1.30053	0.812	0.228	1.16974e-182	LOC795887
si:ch73-266m14.1	5.5207e-187	0.800119	0.449	0.048	1.24227e-182	si:ch73-266m14.1
gm2a	4.27402e-186	1.07329	0.845	0.236	9.61739e-182	gm2a
si:dkey-69o16.5	4.39195e-186	0.806285	0.522	0.077	9.88276e-182	si:dkey-69o16.5
slc2a6	1.1629e-184	0.842698	0.399	0.035	2.61676e-180	slc2a6
cd74b	3.84636e-184	1.32646	0.991	0.721	8.65508e-180	cd74b
plxnc1	1.13827e-183	1.10689	0.828	0.232	2.56134e-179	plxnc1
si:ch211-271e10.3	6.74468e-183	0.805572	0.488	0.064	1.51769e-178	si:ch211-271e10.3
ctsla	2.64375e-182	1.69962	0.989	0.514	5.94897e-178	ctsla
gbp1	3.22194e-181	1.01734	0.741	0.181	7.25001e-177	gbp1
naga	5.53239e-181	1.3189	0.884	0.302	1.2449e-176	naga
2022-03-08	8.77947e-181	0.825478	0.697	0.153	1.97556e-176	2022-03-08
ston2	1.02927e-179	0.639955	0.397	0.036	2.31607e-175	ston2
mpp1	3.13055e-179	1.08944	0.841	0.258	7.04437e-175	mpp1
si:ch211-253h3.1	4.28983e-179	0.885875	0.65	0.137	9.65298e-175	si:ch211-253h3.1
sdc3	3.1307e-178	1.14445	0.861	0.263	7.04471e-174	sdc3
LOC101885830	4.9479e-178	0.781374	0.512	0.077	1.11338e-173	LOC101885830
kel	1.79636e-177	0.707627	0.377	0.031	4.04217e-173	kel
rxraa	2.41795e-176	0.998165	0.727	0.174	5.44086e-172	rxraa
wu:fj81e10	5.06111e-175	0.664453	0.449	0.055	1.13885e-170	wu:fj81e10
si:ch73-380l3.2	5.32827e-175	0.824509	0.497	0.073	1.19897e-170	si:ch73-380l3.2
enosf1	2.17998e-174	0.886188	0.747	0.192	4.9054e-170	enosf1
si:dkey-204f11.64	5.38085e-173	0.841745	0.625	0.13	1.2108e-168	si:dkey-204f11.64
glmp	1.58542e-171	0.761364	0.649	0.141	3.56752e-167	glmp
rbm47	5.39749e-171	0.892156	0.77	0.203	1.21454e-166	rbm47
ctsh	8.18075e-171	1.37927	0.949	0.501	1.84083e-166	ctsh
zgc:110239	1.42129e-169	1.3828	0.914	0.361	3.19819e-165	zgc:110239
sh3d21	1.62353e-169	0.672802	0.429	0.05	3.65326e-165	sh3d21
zgc:198419	8.69642e-169	2.26103	0.798	0.269	1.95687e-164	zgc:198419
htra1a	4.55693e-168	0.693679	0.314	0.018	1.0254e-163	htra1a
acvrl1	1.62294e-167	0.801618	0.745	0.182	3.65195e-163	acvrl1
lgals9l1	3.05936e-167	1.13527	0.893	0.33	6.88416e-163	lgals9l1
alcama	3.68879e-167	0.831658	0.613	0.123	8.30051e-163	alcama
abcg2a	7.95708e-167	1.52557	0.622	0.14	1.7905e-162	abcg2a
zgc:158343.2	9.48197e-167	1.23424	0.721	0.191	2.13363e-162	zgc:158343.2
ncoa4	1.11103e-166	1.20443	0.686	0.176	2.50004e-162	ncoa4
blvrb	5.09548e-165	1.19843	0.684	0.172	1.14658e-160	blvrb
pgm2l1	1.26896e-163	0.928452	0.478	0.073	2.85542e-159	pgm2l1
pycard	1.29274e-163	1.24296	0.855	0.309	2.90893e-159	pycard
ip6k2a	4.47462e-162	0.99623	0.788	0.24	1.00688e-157	ip6k2a
pikfyve	3.03758e-161	0.702012	0.576	0.114	6.83517e-157	pikfyve
arhgap22	5.11985e-160	0.637609	0.388	0.042	1.15207e-155	arhgap22
porb	1.77694e-159	1.00329	0.593	0.131	3.99847e-155	porb
mcoln2	7.94251e-159	0.557296	0.308	0.019	1.78722e-154	mcoln2
zgc:152791	2.62298e-158	1.29368	0.943	0.521	5.90223e-154	zgc:152791
bcam	2.77555e-158	1.10921	0.516	0.093	6.24555e-154	bcam
cpvl	2.01752e-156	0.895786	0.738	0.202	4.53982e-152	cpvl
rit1	5.96698e-156	0.678776	0.516	0.092	1.34269e-151	rit1
LOC100004199	1.06687e-155	1.41953	0.994	0.587	2.40067e-151	LOC100004199
sgk3	1.55204e-155	0.678016	0.479	0.08	3.49241e-151	sgk3
ms4a17a.6	5.8743e-155	0.743322	0.719	0.179	1.32183e-150	ms4a17a.6
zgc:136870.1	1.08631e-154	0.655691	0.445	0.065	2.44442e-150	zgc:136870.1
si:ch211-271e10.2	3.05429e-153	0.710847	0.424	0.059	6.87277e-149	si:ch211-271e10.2
dnase1l4.1	4.26528e-153	0.73964	0.374	0.041	9.59773e-149	dnase1l4.1
ctbs.1	5.84491e-153	0.662657	0.458	0.071	1.31522e-148	ctbs.1
cndp2	6.07724e-153	1.1142	0.903	0.38	1.3675e-148	cndp2
arhgef15	1.19357e-152	0.582633	0.343	0.032	2.68576e-148	arhgef15
gulp1b	2.32162e-152	0.587096	0.33	0.028	5.22411e-148	gulp1b
LOC100331324	9.14876e-152	0.596711	0.416	0.056	2.05865e-147	LOC100331324
LOC101883708	2.03335e-151	1.32026	0.885	0.337	4.57545e-147	LOC101883708
zgc:153317	3.95248e-151	1.28438	0.893	0.383	8.89386e-147	zgc:153317
b3gnt2l	5.05975e-150	0.770815	0.406	0.055	1.13855e-145	b3gnt2l
cgref1	1.63716e-149	0.641198	0.401	0.052	3.68395e-145	cgref1
mospd2	2.82985e-149	0.686198	0.525	0.104	6.36772e-145	mospd2
efhd2	1.44854e-148	0.953547	0.741	0.225	3.2595e-144	efhd2
si:ch211-244b2.3	3.10559e-148	0.525476	0.537	0.103	6.98819e-144	si:ch211-244b2.3
LOC108179114	7.56539e-148	0.613644	0.35	0.035	1.70236e-143	LOC108179114
itgae.1.2	3.77268e-147	0.773217	0.307	0.023	8.48928e-143	itgae.1.2
tspan36.1	8.80049e-147	0.953631	0.718	0.206	1.98029e-142	tspan36.1
sox11b	5.32053e-146	0.619017	0.367	0.042	1.19723e-141	sox11b
prss16	1.12154e-145	0.725375	0.643	0.157	2.52368e-141	prss16
slc36a1	1.20542e-145	0.64474	0.446	0.072	2.71244e-141	slc36a1
nfs1	1.8875e-145	0.701804	0.478	0.087	4.24726e-141	nfs1
pon1	3.19383e-145	0.729457	0.343	0.035	7.18676e-141	pon1
scpep1	3.64005e-145	1.12685	0.896	0.361	8.19083e-141	scpep1
LOC564808	5.50902e-145	0.762404	0.411	0.058	1.23964e-140	LOC564808
zgc:194125	6.24534e-145	1.88493	0.47	0.086	1.40533e-140	zgc:194125
smox	8.7302e-145	0.908869	0.874	0.313	1.96447e-140	smox
si:busm1-266f07.2	1.63989e-144	1.27252	0.962	0.647	3.69008e-140	si:busm1-266f07.2
xcr1b.2	9.3994e-144	0.597513	0.327	0.031	2.11505e-139	xcr1b.2
cx32.2	1.14703e-143	0.648083	0.381	0.049	2.58104e-139	cx32.2
pepd	3.66884e-143	0.987578	0.87	0.332	8.25563e-139	pepd
gnsb	6.56753e-143	1.04809	0.837	0.285	1.47782e-138	gnsb
arhgap33	2.6008e-142	0.67927	0.474	0.085	5.85231e-138	arhgap33
pik3cd	4.09752e-142	0.770965	0.539	0.113	9.22023e-138	pik3cd
si:busm1-48c11.3	4.1279e-142	1.02317	0.784	0.248	9.28859e-138	si:busm1-48c11.3
rnaseka	1.34536e-141	1.05468	0.896	0.383	3.02734e-137	rnaseka
si:ch211-122f10.4	2.08469e-141	0.681101	0.558	0.122	4.69098e-137	si:ch211-122f10.4
m6pr	2.12277e-141	0.831278	0.708	0.21	4.77665e-137	m6pr
cbr1l	4.92596e-141	0.652896	0.563	0.125	1.10844e-136	cbr1l
LOC100149641	5.59838e-140	0.554168	0.339	0.036	1.25975e-135	LOC100149641
lipin2	6.46215e-140	0.717691	0.674	0.182	1.45411e-135	lipin2
caspa	2.73025e-139	0.567348	0.569	0.125	6.1436e-135	caspa
atp6v1e1b	5.41636e-139	0.950497	0.858	0.33	1.21879e-134	atp6v1e1b
il12rb2	1.95917e-138	0.490997	0.355	0.041	4.40851e-134	il12rb2
si:ch211-15b10.6	2.28461e-138	0.839516	0.776	0.247	5.14082e-134	si:ch211-15b10.6
sla1	4.47385e-138	0.546497	0.48	0.089	1.00671e-133	sla1
ehbp1l1b.1	4.68472e-138	0.567562	0.391	0.055	1.05416e-133	ehbp1l1b.1
aste1	6.12943e-138	0.741715	0.551	0.122	1.37924e-133	aste1
cblb	7.41958e-138	0.532969	0.399	0.058	1.66955e-133	cblb
mtss1	1.56992e-137	0.627025	0.472	0.087	3.53262e-133	mtss1
atp13a2	3.34591e-137	0.561758	0.339	0.037	7.52896e-133	atp13a2
LOC110440171	5.19996e-137	0.559668	0.306	0.028	1.1701e-132	LOC110440171
slc30a1a	7.93185e-137	0.672727	0.527	0.112	1.78483e-132	slc30a1a
fabp11a	1.05252e-136	1.53168	0.938	0.461	2.36838e-132	fabp11a
epb41l3b	1.22296e-136	0.487163	0.34	0.038	2.75189e-132	epb41l3b
slc15a2	1.24849e-136	0.546938	0.311	0.029	2.80936e-132	slc15a2
slc7a8a	1.33512e-136	0.642616	0.714	0.199	3.00428e-132	slc7a8a
si:dkeyp-9d4.2	2.56521e-136	0.924776	0.795	0.271	5.77225e-132	si:dkeyp-9d4.2
LOC100002141	9.1605e-136	0.692909	0.383	0.055	2.0613e-131	LOC100002141
si:dkey-58f10.6.1	2.15586e-135	0.538771	0.335	0.037	4.85111e-131	si:dkey-58f10.6.1
cadm4	2.66942e-134	0.634188	0.432	0.073	6.00672e-130	cadm4
LOC100151335.1	9.17327e-134	0.675296	0.403	0.061	2.06417e-129	LOC100151335.1
lgals3bpb	1.69894e-133	1.8119	0.743	0.278	3.82295e-129	lgals3bpb
LOC562542	2.80263e-133	0.560279	0.432	0.072	6.30647e-129	LOC562542
id2a	5.70058e-132	0.877283	0.755	0.244	1.28274e-127	id2a
zgc:174863	7.12161e-132	0.899269	0.81	0.296	1.6025e-127	zgc:174863
slc38a6	1.43786e-131	0.635946	0.439	0.078	3.23547e-127	slc38a6
tmem165	2.53837e-131	0.581308	0.525	0.116	5.71184e-127	tmem165
si:ch211-1o7.3	2.74473e-131	0.453782	0.446	0.077	6.17619e-127	si:ch211-1o7.3
iqsec2b	6.49166e-131	0.614349	0.636	0.164	1.46075e-126	iqsec2b
si:dkey-58f10.11	1.21531e-130	0.589777	0.469	0.091	2.73468e-126	si:dkey-58f10.11
cd74a	1.87884e-130	1.02389	0.995	0.809	4.22776e-126	cd74a
rab38b	2.03826e-130	0.797771	0.311	0.032	4.58649e-126	rab38b
spns1	3.44614e-130	0.662617	0.472	0.094	7.75451e-126	spns1
vaspb	4.08745e-130	0.589238	0.569	0.137	9.19758e-126	vaspb
si:dkey-206m15.8	4.93715e-130	0.622366	0.284	0.024	1.11096e-125	si:dkey-206m15.8
si:dkey-24p1.7	3.32898e-129	0.615776	0.63	0.161	7.49088e-125	si:dkey-24p1.7
dicp1.1	8.07032e-129	1.68611	0.465	0.104	1.81598e-124	dicp1.1
LOC101882012	2.27086e-128	0.975165	0.291	0.027	5.10989e-124	LOC101882012
igf2r	2.0331e-127	0.594865	0.474	0.096	4.57487e-123	igf2r
rxrgb	3.10778e-127	0.579339	0.461	0.091	6.99312e-123	rxrgb
si:cabz01074944.1	1.85233e-126	0.463431	0.332	0.041	4.16812e-122	si:cabz01074944.1
atp6v1ab.1	3.32214e-126	0.571392	0.413	0.071	7.47549e-122	atp6v1ab.1
si:ch211-283g2.3	3.9819e-126	0.626644	0.331	0.04	8.96007e-122	si:ch211-283g2.3
slc16a10	4.84922e-126	0.741324	0.683	0.198	1.09117e-121	slc16a10
pld3	5.84463e-126	0.537215	0.29	0.028	1.31516e-121	pld3
si:dkey-79f11.10	2.02755e-125	1.35786	0.314	0.036	4.5624e-121	si:dkey-79f11.10
blk	2.16088e-125	0.4392	0.324	0.038	4.86242e-121	blk
si:busm1-194e12.12	2.352e-125	1.04581	0.827	0.319	5.29248e-121	si:busm1-194e12.12
f10	2.50969e-125	0.49301	0.291	0.028	5.6473e-121	f10
slc31a1	2.87783e-125	0.557922	0.473	0.097	6.4757e-121	slc31a1
atp6v1d	3.21871e-125	0.657142	0.647	0.183	7.24275e-121	atp6v1d
helz2	3.58896e-125	0.667724	0.421	0.074	8.07587e-121	helz2
si:ch211-219a4.3	4.45109e-125	0.640685	0.637	0.179	1.00159e-120	si:ch211-219a4.3
fuca1.2	1.15017e-124	0.579839	0.454	0.09	2.58811e-120	fuca1.2
arrdc2	1.15245e-124	0.849329	0.802	0.289	2.59324e-120	arrdc2
tspan37	1.38492e-124	0.78743	0.727	0.229	3.11634e-120	tspan37
si:ch211-106a19.1	3.19048e-124	0.578752	0.353	0.049	7.17921e-120	si:ch211-106a19.1
nav1a	4.43189e-124	0.604137	0.546	0.131	9.97264e-120	nav1a
zgc:92249	8.81239e-124	0.730002	0.647	0.181	1.98296e-119	zgc:92249
LOC101886537.1	1.4263e-123	0.557145	0.305	0.033	3.20946e-119	LOC101886537.1
samsn1a	5.72369e-123	0.606208	0.573	0.143	1.28795e-118	samsn1a
mhc1lda	6.90098e-123	0.656169	0.306	0.034	1.55286e-118	mhc1lda
hs6st1a	7.65305e-123	0.511729	0.336	0.044	1.72209e-118	hs6st1a
si:dkey-118k5.3	1.72961e-122	0.557913	0.377	0.06	3.89197e-118	si:dkey-118k5.3
abi2b	2.37776e-122	0.635925	0.669	0.194	5.35044e-118	abi2b
LOC100332737	4.5044e-122	0.587592	0.259	0.02	1.01358e-117	LOC100332737
rapgef1a	5.10711e-122	0.565807	0.491	0.106	1.1492e-117	rapgef1a
atp6ap1b	2.32488e-121	0.608475	0.683	0.205	5.23144e-117	atp6ap1b
isca2	7.21834e-121	0.561197	0.507	0.119	1.62427e-116	isca2
hic1	1.28042e-120	0.490281	0.52	0.118	2.88121e-116	hic1
zgc:123258	1.39829e-120	0.608998	0.637	0.181	3.14643e-116	zgc:123258
atp13a2.1	1.68756e-120	0.543939	0.316	0.039	3.79736e-116	atp13a2.1
arhgap4a	2.44841e-120	0.465142	0.473	0.098	5.50942e-116	arhgap4a
sidt2	3.04553e-120	0.507944	0.469	0.1	6.85305e-116	sidt2
atp6v0e1	4.8487e-120	0.964881	0.929	0.495	1.09105e-115	atp6v0e1
mfsd1	6.43746e-120	0.516325	0.36	0.056	1.44856e-115	mfsd1
atp6v0b	1.61519e-119	0.653066	0.649	0.195	3.63451e-115	atp6v0b
xaf1	2.08204e-119	0.64603	0.678	0.205	4.68501e-115	xaf1
rab32a	3.96428e-119	0.656324	0.56	0.147	8.92042e-115	rab32a
si:dkey-256h2.1	5.15771e-119	0.507759	0.387	0.066	1.16059e-114	si:dkey-256h2.1
hck	5.28253e-119	0.50677	0.293	0.032	1.18868e-114	hck
tmem268	6.00117e-119	0.539692	0.546	0.135	1.35038e-114	tmem268
psme2	9.1718e-119	0.886023	0.847	0.36	2.06384e-114	psme2
si:dkey-253d23.3	9.46073e-119	0.556785	0.534	0.128	2.12885e-114	si:dkey-253d23.3
itsn1	1.22343e-118	0.528071	0.421	0.08	2.75297e-114	itsn1
gna12a	1.32711e-118	0.508426	0.509	0.116	2.98626e-114	gna12a
zgc:172352	1.81531e-118	0.511317	0.641	0.179	4.08481e-114	zgc:172352
ctsz	2.89767e-118	1.10371	0.929	0.438	6.52033e-114	ctsz
atp6v1c1a	3.3217e-118	0.446308	0.499	0.114	7.4745e-114	atp6v1c1a
si:dkey-58f10.7.1	4.46081e-118	0.463687	0.259	0.022	1.00377e-113	si:dkey-58f10.7.1
si:ch211-217k17.11	1.07803e-117	1.08217	0.934	0.498	2.42579e-113	si:ch211-217k17.11
man2b1	2.0468e-117	0.507961	0.621	0.171	4.60572e-113	man2b1
si:ch211-74m13.3	2.89154e-117	0.733078	0.827	0.293	6.50655e-113	si:ch211-74m13.3
txn.1	3.47694e-117	0.856905	0.474	0.104	7.8238e-113	txn.1
atp6v1f	4.01191e-117	0.723351	0.757	0.265	9.0276e-113	atp6v1f
map1lc3b	4.24982e-117	0.774107	0.762	0.281	9.56295e-113	map1lc3b
prkcha	7.92586e-117	0.464791	0.351	0.052	1.78348e-112	prkcha
lmnb1	1.05963e-116	0.531094	0.513	0.123	2.38438e-112	lmnb1
si:dkeyp-118h9.7	3.19572e-116	0.896293	0.703	0.231	7.19102e-112	si:dkeyp-118h9.7
ssuh2.4.1	5.63312e-116	0.459065	0.448	0.091	1.26757e-111	ssuh2.4.1
cyba	1.29781e-115	0.891682	0.845	0.329	2.92034e-111	cyba
calr3a	1.54649e-115	0.787544	0.63	0.189	3.47991e-111	calr3a
atp1a1a.1	1.57457e-115	0.755466	0.791	0.291	3.54311e-111	atp1a1a.1
il1fma	2.66631e-115	0.395622	0.338	0.048	5.99973e-111	il1fma
si:ch211-209f23.6	5.0062e-115	0.565623	0.335	0.049	1.12649e-110	si:ch211-209f23.6
mertka	8.92474e-115	0.447925	0.386	0.067	2.00825e-110	mertka
slc31a1.1	1.14214e-114	0.582728	0.408	0.078	2.57005e-110	slc31a1.1
unc93b1	1.20855e-114	0.475146	0.324	0.045	2.71948e-110	unc93b1
atp6v1h	2.09e-114	0.565531	0.674	0.21	4.70291e-110	atp6v1h
rnf130	5.08898e-114	0.522766	0.527	0.131	1.14512e-109	rnf130
tcf7l1a	1.19471e-113	0.513653	0.512	0.123	2.68835e-109	tcf7l1a
arvcfb	1.3536e-113	0.419975	0.388	0.068	3.04586e-109	arvcfb
LOC108179692.1	2.03994e-113	0.447076	0.268	0.027	4.59028e-109	LOC108179692.1
dcxr	1.47849e-112	0.390646	0.329	0.047	3.3269e-108	dcxr
si:ch211-132p1.3	2.28923e-112	0.979399	0.819	0.354	5.15122e-108	si:ch211-132p1.3
si:dkey-79f11.7	3.19478e-112	0.616176	0.264	0.026	7.1889e-108	si:dkey-79f11.7
rpz5	4.0154e-112	0.527441	0.635	0.179	9.03545e-108	rpz5
deptor	4.1524e-112	0.468803	0.446	0.095	9.34374e-108	deptor
sqstm1	5.0183e-112	0.908469	0.775	0.298	1.12922e-107	sqstm1
si:dkey-21a6.5	1.30419e-111	0.457448	0.448	0.095	2.93469e-107	si:dkey-21a6.5
qki2	1.56958e-111	0.455088	0.552	0.142	3.53187e-107	qki2
ophn1	1.63087e-111	0.477176	0.351	0.056	3.66978e-107	ophn1
glb1	1.95586e-111	0.465166	0.29	0.035	4.40107e-107	glb1
gstp1	2.94906e-111	1.11917	0.884	0.449	6.63598e-107	gstp1
bsg	4.14765e-111	0.844002	0.869	0.396	9.33303e-107	bsg
si:dkey-126g1.7	4.73926e-111	0.530105	0.396	0.073	1.06643e-106	si:dkey-126g1.7
id1	3.41841e-110	0.956026	0.917	0.447	7.69212e-106	id1
grapa	7.55578e-110	0.566474	0.494	0.12	1.7002e-105	grapa
ogfrl2.1	9.31869e-110	0.476558	0.535	0.139	2.09689e-105	ogfrl2.1
pkig	1.59187e-109	0.432893	0.35	0.058	3.58203e-105	pkig
rcan1a	6.36484e-109	0.866277	0.479	0.12	1.43222e-104	rcan1a
msna.1	1.87377e-108	0.972403	0.901	0.486	4.21636e-104	msna.1
txndc17	5.31307e-108	0.353135	0.41	0.083	1.19555e-103	txndc17
txn	2.52942e-107	0.575156	0.765	0.276	5.6917e-103	txn
lcp2a	3.80542e-107	0.376607	0.522	0.13	8.56296e-103	lcp2a
LOC100534786	4.96846e-107	0.725231	0.378	0.07	1.118e-102	LOC100534786
wu:fj29h11	6.01525e-107	0.579717	0.68	0.221	1.35355e-102	wu:fj29h11
tspan36	8.13623e-107	0.713095	0.788	0.279	1.83082e-102	tspan36
psmf1	1.12645e-106	0.472499	0.563	0.156	2.53475e-102	psmf1
zgc:173593	1.40455e-106	1.28781	0.372	0.07	3.16053e-102	zgc:173593
palm1b	2.19194e-106	0.374351	0.278	0.033	4.9323e-102	palm1b
slc12a7b	2.33621e-105	0.423821	0.532	0.14	5.25694e-101	slc12a7b
lipf	3.05405e-105	0.636328	0.621	0.189	6.87223e-101	lipf
ifit8	4.36835e-105	0.53144	0.316	0.047	9.82967e-101	ifit8
gamt.1	4.81953e-105	0.64125	0.362	0.066	1.08449e-100	gamt.1
asap2b	5.81909e-105	0.443229	0.303	0.043	1.30941e-100	asap2b
suclg1	6.26816e-104	0.652508	0.767	0.285	1.41046e-99	suclg1
si:dkey-53k12.2	1.38438e-103	0.537763	0.595	0.174	3.11514e-99	si:dkey-53k12.2
krt8	1.60562e-103	1.03981	0.884	0.452	3.61297e-99	krt8
si:ch73-103b11.2	2.29925e-103	0.427846	0.369	0.07	5.17376e-99	si:ch73-103b11.2
aimp1	1.9794e-102	0.465265	0.547	0.156	4.45405e-98	aimp1
cyfip1	4.62895e-102	0.469114	0.415	0.091	1.04161e-97	cyfip1
dram2b	6.29948e-102	0.430254	0.532	0.146	1.41751e-97	dram2b
il21r.1	1.67209e-101	0.338932	0.512	0.128	3.76253e-97	il21r.1
mxc	1.80807e-101	0.778509	0.369	0.071	4.06853e-97	mxc
si:ch73-199g24.2	2.79903e-101	0.369711	0.417	0.091	6.29837e-97	si:ch73-199g24.2
zgc:158446.1	3.77157e-101	0.421402	0.388	0.078	8.48679e-97	zgc:158446.1
tmem63ba	5.43657e-101	0.464658	0.368	0.07	1.22334e-96	tmem63ba
plek	1.54661e-100	0.373828	0.645	0.195	3.48019e-96	plek
tnfrsf1a	1.94746e-100	0.53938	0.666	0.221	4.38217e-96	tnfrsf1a
si:ch211-269k10.4	4.06559e-100	0.290533	0.387	0.076	9.14839e-96	si:ch211-269k10.4
si:ch73-22o12.1	2.53711e-99	0.481019	0.424	0.099	5.70901e-95	si:ch73-22o12.1
mfng	3.49847e-99	0.381037	0.55	0.152	7.87226e-95	mfng
prdx1	4.47964e-99	1.24164	0.649	0.241	1.00801e-94	prdx1
abca1b	1.10349e-98	0.421811	0.451	0.108	2.48308e-94	abca1b
abi3a	1.18956e-98	0.408324	0.446	0.105	2.67676e-94	abi3a
atp6v1ba.1	1.76093e-98	0.626395	0.534	0.153	3.96245e-94	atp6v1ba.1
lgals9l3	2.29733e-98	0.547777	0.743	0.274	5.16944e-94	lgals9l3
LOC562648	4.33144e-98	0.416799	0.652	0.208	9.74661e-94	LOC562648
rrbp1a	8.95435e-98	0.453149	0.479	0.125	2.01491e-93	rrbp1a
dbnlb	1.25752e-97	0.461871	0.534	0.153	2.82967e-93	dbnlb
ndfip1l	1.49197e-97	0.653123	0.724	0.268	3.35723e-93	ndfip1l
plekhm1.1	2.50168e-97	0.347928	0.271	0.036	5.62927e-93	plekhm1.1
tec	2.85628e-97	0.358494	0.408	0.091	6.42721e-93	tec
arhgap25	3.08196e-97	0.416194	0.434	0.101	6.93504e-93	arhgap25
ubl7b	5.40935e-97	0.352661	0.485	0.127	1.21721e-92	ubl7b
arhgap12a	6.43873e-97	0.321433	0.33	0.057	1.44884e-92	arhgap12a
gclm	7.65536e-97	0.534966	0.312	0.052	1.72261e-92	gclm
fam65a	1.27796e-96	0.306853	0.439	0.102	2.87567e-92	fam65a
gpr137c	1.48012e-96	0.390899	0.341	0.063	3.33056e-92	gpr137c
spns2	1.58516e-96	0.599084	0.387	0.081	3.56693e-92	spns2
si:dkey-188i13.7	2.18309e-96	0.790179	0.832	0.382	4.91239e-92	si:dkey-188i13.7
eif4ebp1.1	4.95305e-96	0.322773	0.453	0.111	1.11454e-91	eif4ebp1.1
LOC108183454	5.09661e-96	0.389724	0.25	0.03	1.14684e-91	LOC108183454
mtmr14	5.19371e-96	0.3573	0.418	0.096	1.16869e-91	mtmr14
cdc25b	2.0162e-95	0.505454	0.638	0.207	4.53685e-91	cdc25b
zgc:101723	2.47165e-95	0.409974	0.491	0.134	5.56171e-91	zgc:101723
dusp6.1	3.02015e-95	0.521571	0.636	0.211	6.79594e-91	dusp6.1
ehbp1l1b	3.24305e-95	0.369593	0.26	0.034	7.29751e-91	ehbp1l1b
rgs18	3.86131e-95	0.40376	0.461	0.115	8.68873e-91	rgs18
themis2	4.35071e-95	0.354831	0.312	0.052	9.78996e-91	themis2
fkbp2	6.56749e-95	0.411362	0.506	0.141	1.47782e-90	fkbp2
bloc1s2	7.19682e-95	0.378596	0.493	0.133	1.61943e-90	bloc1s2
atp6v1g1.1	8.6443e-95	0.530877	0.759	0.291	1.94514e-90	atp6v1g1.1
slc12a2	1.03226e-94	0.428345	0.406	0.093	2.32279e-90	slc12a2
wipf1b	2.19357e-94	0.460335	0.63	0.204	4.93598e-90	wipf1b
tcea3	3.75074e-94	0.368797	0.512	0.141	8.43992e-90	tcea3
LOC101883331	4.06784e-94	0.388678	0.387	0.082	9.15345e-90	LOC101883331
si:dkeyp-115e12.6.1	4.95406e-94	0.388481	0.25	0.031	1.11476e-89	si:dkeyp-115e12.6.1
marcksl1a	5.22491e-94	0.897773	0.922	0.601	1.17571e-89	marcksl1a
sik1	6.70202e-94	0.377925	0.488	0.128	1.50809e-89	sik1
LOC100151335	8.521e-94	0.491485	0.273	0.039	1.91739e-89	LOC100151335
dbn1	1.75185e-93	0.450328	0.498	0.135	3.942e-89	dbn1
smad1	2.59072e-93	0.354553	0.394	0.086	5.82964e-89	smad1
stk10	3.12318e-93	0.366878	0.555	0.163	7.02778e-89	stk10
zgc:173594	4.91121e-93	2.02754	0.473	0.143	1.10512e-88	zgc:173594
dicp3.3.1	5.1481e-93	0.487528	0.442	0.11	1.15843e-88	dicp3.3.1
dspa	5.88799e-93	0.420088	0.392	0.088	1.32491e-88	dspa
tmem104	6.19138e-93	0.439955	0.388	0.087	1.39319e-88	tmem104
fcer1gl	1.14881e-92	0.691272	0.942	0.507	2.58505e-88	fcer1gl
xcr1b.3	2.73648e-92	0.425123	0.265	0.037	6.15763e-88	xcr1b.3
fybb	3.07048e-92	0.370699	0.733	0.248	6.9092e-88	fybb
slc16a6b	7.80912e-92	0.423128	0.267	0.038	1.75721e-87	slc16a6b
LOC103909973	1.36963e-91	1.0093	0.542	0.169	3.08194e-87	LOC103909973
tmem176l.4	1.65564e-91	0.496318	0.454	0.114	3.72552e-87	tmem176l.4
atox1	2.74491e-91	0.606748	0.708	0.268	6.1766e-87	atox1
slc43a2a	3.25496e-91	0.663872	0.761	0.297	7.32431e-87	slc43a2a
glb1l	3.35558e-91	0.385206	0.461	0.12	7.55072e-87	glb1l
ostm1	1.1373e-90	0.391933	0.546	0.163	2.55915e-86	ostm1
si:ch73-40a2.1	1.63735e-90	0.435812	0.295	0.049	3.68436e-86	si:ch73-40a2.1
LOC100151049	2.59191e-90	0.877198	0.948	0.587	5.83232e-86	LOC100151049
si:ch211-153b23.7	2.65202e-90	0.404894	0.422	0.102	5.96758e-86	si:ch211-153b23.7
LOC100007492	5.53477e-90	0.385628	0.324	0.061	1.24544e-85	LOC100007492
dock8	7.30091e-90	0.39001	0.527	0.156	1.64285e-85	dock8
dicp3.1	1.17606e-89	0.389235	0.379	0.084	2.64638e-85	dicp3.1
thap4	1.48683e-89	0.348911	0.341	0.068	3.34566e-85	thap4
zgc:64072	2.52986e-89	0.742076	0.848	0.381	5.69269e-85	zgc:64072
npc1	2.99584e-89	0.458668	0.617	0.203	6.74123e-85	npc1
rhbdf1a	7.77716e-89	0.384261	0.483	0.137	1.75002e-84	rhbdf1a
cd9a	8.68259e-89	0.375665	0.571	0.176	1.95376e-84	cd9a
ust	9.92696e-89	0.379868	0.286	0.046	2.23377e-84	ust
btk	1.03921e-88	0.338184	0.296	0.051	2.33844e-84	btk
stat1b	2.8275e-88	0.425244	0.574	0.18	6.36244e-84	stat1b
tram1	2.90203e-88	0.421034	0.394	0.094	6.53015e-84	tram1
si:dkey-188i13.10	3.22037e-88	0.511076	0.735	0.291	7.24649e-84	si:dkey-188i13.10
calm1a	7.0522e-88	0.804359	0.693	0.278	1.58689e-83	calm1a
ly75	9.79913e-88	0.425232	0.491	0.14	2.205e-83	ly75
LOC101886260	1.15443e-87	0.428563	0.552	0.171	2.59771e-83	LOC101886260
cst3	1.48432e-87	0.775615	0.865	0.439	3.34001e-83	cst3
itm2bb	2.24662e-87	0.79461	0.938	0.6	5.05535e-83	itm2bb
lamtor5	3.15957e-87	0.377492	0.508	0.151	7.10966e-83	lamtor5
LOC402879	1.71761e-86	0.329865	0.344	0.072	3.86496e-82	LOC402879
si:dkey-222f2.7	2.27084e-86	0.292757	0.441	0.113	5.10983e-82	si:dkey-222f2.7
lsm6	3.96102e-86	0.462441	0.489	0.143	8.91308e-82	lsm6
ada	4.85045e-86	0.371803	0.362	0.081	1.09145e-81	ada
ubash3ba	6.56204e-86	0.422233	0.389	0.092	1.47659e-81	ubash3ba
hcls1	1.26324e-85	0.604852	0.794	0.331	2.84255e-81	hcls1
zgc:171695	1.28522e-85	0.588396	0.277	0.045	2.89201e-81	zgc:171695
tmem9b	1.36016e-85	0.362014	0.479	0.136	3.06064e-81	tmem9b
dhx58	3.02395e-85	0.367823	0.367	0.082	6.80449e-81	dhx58
wee2.1	3.1059e-85	0.333827	0.425	0.109	6.98889e-81	wee2.1
nck1a	5.9283e-85	0.296585	0.549	0.17	1.33399e-80	nck1a
tex2	1.10548e-84	0.554663	0.482	0.142	2.48756e-80	tex2
si:ch211-79k12.1	1.24784e-84	0.669531	0.785	0.326	2.80788e-80	si:ch211-79k12.1
zgc:153654	1.8848e-84	0.310704	0.349	0.074	4.24119e-80	zgc:153654
irf9	1.9891e-84	0.271276	0.456	0.123	4.47587e-80	irf9
si:ch73-92i20.1	2.47562e-84	0.356705	0.502	0.147	5.57064e-80	si:ch73-92i20.1
vat1	2.71165e-84	0.43746	0.382	0.091	6.10176e-80	vat1
mapre1a	9.66276e-84	0.453351	0.741	0.279	2.17431e-79	mapre1a
zgc:193725	1.50115e-83	0.330296	0.516	0.149	3.3779e-79	zgc:193725
gtf2b	1.73664e-83	0.286911	0.434	0.116	3.90779e-79	gtf2b
b2m	2.50079e-83	0.573063	0.995	0.944	5.62727e-79	b2m
ppp1r18	2.50182e-83	0.3043	0.576	0.187	5.6296e-79	ppp1r18
cklf	4.83292e-83	0.274627	0.403	0.1	1.0875e-78	cklf
plxdc2	1.44621e-82	0.387046	0.29	0.053	3.25425e-78	plxdc2
myo9b	1.87104e-82	0.326432	0.456	0.126	4.2102e-78	myo9b
tmem59	1.93145e-82	0.490811	0.689	0.268	4.34615e-78	tmem59
fbxo7	1.97025e-82	0.347801	0.353	0.08	4.43345e-78	fbxo7
adam10a	2.4834e-82	0.512138	0.766	0.324	5.58815e-78	adam10a
galt	2.9901e-82	0.310925	0.295	0.055	6.72832e-78	galt
atg3	3.17157e-82	0.335405	0.48	0.14	7.13667e-78	atg3
hectd1	8.21493e-82	0.333613	0.568	0.187	1.84852e-77	hectd1
ube2al	1.41152e-81	0.358581	0.575	0.191	3.17619e-77	ube2al
tapbp.1	2.59448e-81	0.397524	0.559	0.185	5.8381e-77	tapbp.1
rp2	8.66193e-81	0.345462	0.451	0.13	1.94911e-76	rp2
LOC108179059	9.33925e-81	0.288143	0.508	0.157	2.10152e-76	LOC108179059
gbp2	9.56699e-81	0.283173	0.277	0.048	2.15276e-76	gbp2
cox6a2	1.04517e-80	0.52633	0.52	0.163	2.35184e-76	cox6a2
slc2a13b	1.05797e-80	0.40194	0.311	0.063	2.38063e-76	slc2a13b
atp6ap2	1.45013e-80	0.422268	0.748	0.293	3.26308e-76	atp6ap2
grb2b	1.67265e-80	0.478544	0.705	0.275	3.7638e-76	grb2b
mafba	1.95919e-80	0.585268	0.923	0.44	4.40856e-76	mafba
bdh2	2.12561e-80	0.297269	0.458	0.13	4.78305e-76	bdh2
aplp2	2.14356e-80	0.636831	0.882	0.384	4.82343e-76	aplp2
chd4b.1	2.92442e-80	0.425776	0.478	0.146	6.58054e-76	chd4b.1
cox4i2	5.0678e-80	0.546138	0.517	0.168	1.14036e-75	cox4i2
coro1ca	5.24386e-80	0.304087	0.26	0.043	1.17997e-75	coro1ca
sri	5.92905e-80	0.74879	0.824	0.399	1.33415e-75	sri
ndufc2	1.44127e-79	0.365703	0.632	0.23	3.24315e-75	ndufc2
cxcl8a	1.60503e-79	0.879978	0.442	0.126	3.61163e-75	cxcl8a
cyth1b	1.78438e-79	0.300008	0.473	0.139	4.01521e-75	cyth1b
commd2	2.07102e-79	0.341137	0.368	0.091	4.66021e-75	commd2
keap1a	3.393e-79	0.412511	0.271	0.048	7.63493e-75	keap1a
tex264a	3.50557e-79	0.341013	0.368	0.089	7.88823e-75	tex264a
rhocb	4.28588e-79	0.363397	0.479	0.146	9.64409e-75	rhocb
btr29	5.40663e-79	0.300489	0.269	0.047	1.2166e-74	btr29
prdx6	5.55678e-79	0.459397	0.666	0.259	1.25039e-74	prdx6
bloc1s6	7.46023e-79	0.43124	0.635	0.237	1.6787e-74	bloc1s6
jak2b	1.01748e-78	0.251924	0.422	0.114	2.28953e-74	jak2b
gba	1.46633e-78	0.293374	0.408	0.107	3.29954e-74	gba
lnpep	2.78666e-78	0.324737	0.587	0.199	6.27054e-74	lnpep
grap2b	3.64013e-78	0.299969	0.692	0.253	8.19102e-74	grap2b
si:ch211-244b2.4	5.02401e-78	0.30821	0.359	0.086	1.1305e-73	si:ch211-244b2.4
LOC100535167.1	8.01774e-78	0.253796	0.338	0.075	1.80415e-73	LOC100535167.1
npm3	1.22643e-77	0.351262	0.426	0.121	2.75972e-73	npm3
mlx	1.36788e-77	0.339587	0.536	0.176	3.07801e-73	mlx
im:7154036	2.78265e-77	0.300996	0.601	0.204	6.26152e-73	im:7154036
LOC100537840	8.15021e-77	0.435518	0.781	0.329	1.83396e-72	LOC100537840
irge4	2.12132e-76	0.291094	0.252	0.042	4.7734e-72	irge4
LOC110438472	3.22491e-76	0.349577	0.566	0.191	7.2567e-72	LOC110438472
zgc:153073	8.71075e-76	0.46761	0.766	0.318	1.96009e-71	zgc:153073
nfe2l2a	1.36353e-75	0.584028	0.831	0.384	3.06822e-71	nfe2l2a
wu:fi37e09	2.49232e-75	0.385511	0.68	0.265	5.60823e-71	wu:fi37e09
stard8.1	4.20321e-75	0.261563	0.31	0.067	9.45806e-71	stard8.1
fabp3	1.0109e-74	0.373951	0.703	0.273	2.27472e-70	fabp3
vmp1	3.67083e-74	0.359129	0.482	0.151	8.2601e-70	vmp1
arhgap17b	3.80679e-74	0.253372	0.388	0.102	8.56603e-70	arhgap17b
tpd52l1	6.6948e-74	0.287735	0.29	0.059	1.50646e-69	tpd52l1
mhc1uka	8.34696e-74	0.551104	0.718	0.311	1.87823e-69	mhc1uka
ndufa10	1.00784e-73	0.272082	0.44	0.131	2.26784e-69	ndufa10
LOC103909099	1.10258e-73	0.370729	0.369	0.094	2.48103e-69	LOC103909099
ano10a	1.20909e-73	0.39723	0.312	0.07	2.72069e-69	ano10a
stat2	1.98839e-73	0.257907	0.288	0.058	4.47429e-69	stat2
ipo7	2.08233e-73	0.284257	0.598	0.217	4.68566e-69	ipo7
rnf213a	4.15061e-73	0.758484	0.914	0.563	9.33971e-69	rnf213a
si:dkey-188i13.9	4.45013e-73	0.293682	0.255	0.046	1.00137e-68	si:dkey-188i13.9
tmed5	5.97699e-73	0.339578	0.369	0.097	1.34494e-68	tmed5
cdh5	6.18058e-73	0.319047	0.441	0.126	1.39076e-68	cdh5
LOC100004321	6.85564e-73	0.333818	0.25	0.044	1.54266e-68	LOC100004321
tfe3a	7.54303e-73	0.300945	0.661	0.25	1.69733e-68	tfe3a
si:dkey-42i9.6	1.4497e-72	0.293692	0.593	0.213	3.26211e-68	si:dkey-42i9.6
psma6l	1.77674e-72	0.273898	0.469	0.146	3.99802e-68	psma6l
dip2ba	1.82564e-72	0.296089	0.41	0.116	4.10806e-68	dip2ba
galnt2	7.64254e-72	0.32258	0.253	0.046	1.71972e-67	galnt2
malt3.2	1.61059e-71	0.307461	0.253	0.046	3.62416e-67	malt3.2
ndufs2	4.51863e-71	0.262704	0.501	0.165	1.01678e-66	ndufs2
mao	5.21996e-71	0.350359	0.277	0.058	1.1746e-66	mao
cmtm6	8.22548e-71	0.299166	0.573	0.204	1.8509e-66	cmtm6
hipk3b	1.40148e-70	0.29426	0.411	0.119	3.1536e-66	hipk3b
ube2l3b	4.16883e-70	0.284348	0.621	0.238	9.3807e-66	ube2l3b
abca1a	1.27375e-69	0.523409	0.843	0.387	2.8662e-65	abca1a
LOC100537708	1.60529e-69	0.324659	0.561	0.204	3.61222e-65	LOC100537708
isg15	2.25231e-69	0.592341	0.741	0.333	5.06816e-65	isg15
arhgap4b	3.46641e-69	0.254057	0.391	0.109	7.8001e-65	arhgap4b
rab5aa	3.95193e-69	0.316933	0.652	0.256	8.89263e-65	rab5aa
erap1b	5.96323e-69	0.36633	0.346	0.09	1.34185e-64	erap1b
grinab	8.68592e-69	0.378959	0.469	0.153	1.95451e-64	grinab
slc11a2	9.92953e-69	0.353513	0.305	0.072	2.23434e-64	slc11a2
wls	1.22925e-68	0.343982	0.393	0.112	2.76606e-64	wls
irf1b	1.54031e-68	0.275641	0.575	0.209	3.46601e-64	irf1b
grinab.1	2.00401e-68	0.357103	0.381	0.107	4.50943e-64	grinab.1
pla2g15	2.79656e-68	0.259155	0.389	0.111	6.29283e-64	pla2g15
sh3bp2	3.77607e-68	0.309919	0.351	0.092	8.4969e-64	sh3bp2
tmem258	4.9683e-68	0.505035	0.726	0.32	1.11797e-63	tmem258
psmb1	6.17541e-68	0.398977	0.688	0.29	1.38959e-63	psmb1
rap1b	8.24359e-68	0.431759	0.865	0.459	1.85497e-63	rap1b
arpc5b	1.61498e-67	0.30166	0.649	0.251	3.63403e-63	arpc5b
plcg2	2.75513e-67	0.255261	0.387	0.111	6.19959e-63	plcg2
ppt1	5.84071e-67	0.429555	0.786	0.347	1.31428e-62	ppt1
cox7a2b	5.85186e-67	0.415964	0.783	0.36	1.31679e-62	cox7a2b
fhod1	8.4269e-67	0.264079	0.301	0.07	1.89622e-62	fhod1
psma8	9.35923e-67	0.43152	0.743	0.334	2.10601e-62	psma8
zgc:109934	1.01393e-65	1.86127	0.373	0.116	2.28154e-61	zgc:109934
mgst3b	2.62554e-65	0.482507	0.699	0.305	5.908e-61	mgst3b
npl	2.76377e-65	0.278517	0.449	0.142	6.21904e-61	npl
mcl1b	3.26698e-65	0.424193	0.721	0.309	7.35135e-61	mcl1b
serinc2	4.43507e-65	0.338976	0.74	0.311	9.97978e-61	serinc2
spryd3	4.43559e-65	0.310546	0.268	0.058	9.98097e-61	spryd3
sepp1a	4.89171e-65	0.44393	0.924	0.481	1.10073e-60	sepp1a
psen2	9.97674e-65	0.272133	0.324	0.082	2.24497e-60	psen2
abcc5	2.57056e-64	0.313351	0.679	0.274	5.78428e-60	abcc5
zgc:136826	2.62063e-64	0.287521	0.594	0.23	5.89693e-60	zgc:136826
psma3	3.91503e-64	0.328934	0.662	0.269	8.80961e-60	psma3
cst14a.2	1.16923e-63	0.484444	0.727	0.336	2.631e-59	cst14a.2
srgap3	1.40243e-63	0.380454	0.272	0.062	3.15575e-59	srgap3
rap2b	1.88052e-63	0.272661	0.502	0.177	4.23154e-59	rap2b
zgc:101699	2.92086e-63	0.327127	0.312	0.077	6.57253e-59	zgc:101699
kiaa0040	3.68421e-63	0.349721	0.536	0.196	8.29022e-59	kiaa0040
eea1	1.59572e-62	0.259316	0.303	0.076	3.59069e-58	eea1
actb1.1	2.30581e-62	0.298331	0.303	0.076	5.18853e-58	actb1.1
psmb9a	4.09226e-62	0.307727	0.683	0.287	9.2084e-58	psmb9a
aco2	6.18579e-62	0.270198	0.334	0.092	1.39193e-57	aco2
rac2	9.0842e-62	0.542931	0.886	0.455	2.04413e-57	rac2
akr7a3	1.0388e-61	0.260091	0.274	0.064	2.33751e-57	akr7a3
psmb4	1.35525e-61	0.308535	0.647	0.265	3.04958e-57	psmb4
actb1	2.33202e-61	0.304615	0.392	0.123	5.24751e-57	actb1
gabarapl2	4.88601e-61	0.295913	0.646	0.27	1.09945e-56	gabarapl2
dnajc1	5.8911e-61	0.284844	0.522	0.193	1.32562e-56	dnajc1
zgc:92791	6.05602e-61	0.259018	0.541	0.204	1.36273e-56	zgc:92791
chd4b	7.25379e-61	0.312801	0.363	0.109	1.63225e-56	chd4b
grasp	3.93638e-60	0.307617	0.322	0.088	8.85763e-56	grasp
prdx6.1	4.32076e-60	0.377916	0.374	0.113	9.72258e-56	prdx6.1
zgc:198241	6.43978e-59	0.321212	0.32	0.088	1.44908e-54	zgc:198241
mxf	6.45563e-59	0.604544	0.253	0.056	1.45264e-54	mxf
litaf	8.26488e-59	0.448197	0.837	0.453	1.85976e-54	litaf
arl5c	8.28276e-59	0.26115	0.432	0.145	1.86379e-54	arl5c
arl6ip1.1	2.5539e-58	0.453731	0.689	0.303	5.74678e-54	arl6ip1.1
actr2a	4.32787e-58	0.259329	0.693	0.297	9.73857e-54	actr2a
tpmt.1	4.55295e-58	0.386833	0.35	0.105	1.02451e-53	tpmt.1
adam17a	5.79709e-58	0.254092	0.359	0.11	1.30446e-53	adam17a
LOC100334861	7.67961e-58	0.264538	0.383	0.121	1.72807e-53	LOC100334861
nucb1	9.2534e-58	0.288301	0.449	0.157	2.0822e-53	nucb1
canx	7.15906e-57	0.371576	0.55	0.219	1.61093e-52	canx
pmaip1	3.54585e-56	0.404667	0.383	0.124	7.97888e-52	pmaip1
tmbim4	1.76159e-55	0.253338	0.446	0.16	3.96392e-51	tmbim4
zgc:162730	7.76793e-55	0.540957	0.932	0.633	1.74794e-50	zgc:162730
slc3a2b	7.90036e-55	0.469325	0.479	0.182	1.77774e-50	slc3a2b
rhocb.1	1.65335e-54	0.296202	0.349	0.109	3.72036e-50	rhocb.1
2022-09-15	7.79558e-54	0.283647	0.722	0.325	1.75416e-49	2022-09-15
si:ch211-160e1.5	7.97737e-54	0.288928	0.617	0.267	1.79507e-49	si:ch211-160e1.5
LOC108179126	3.91059e-53	0.528284	0.308	0.089	8.79962e-49	LOC108179126
fam13a	6.71997e-52	0.259256	0.458	0.172	1.51213e-47	fam13a
dusp6	3.5827e-51	0.25602	0.311	0.092	8.06178e-47	dusp6
capza1a	3.70413e-51	0.356054	0.791	0.404	8.33504e-47	capza1a
si:ch211-213a13.1	5.25908e-51	0.283235	0.707	0.329	1.1834e-46	si:ch211-213a13.1
zgc:63831	1.18695e-50	0.34379	0.814	0.395	2.67087e-46	zgc:63831
cebpb	2.95319e-50	0.376559	0.857	0.489	6.64528e-46	cebpb
zgc:64051	4.08685e-50	0.483746	0.887	0.494	9.19623e-46	zgc:64051
ppib	4.55118e-50	0.459982	0.807	0.403	1.02411e-45	ppib
rnaset2l	9.08794e-50	0.281755	0.3	0.087	2.04497e-45	rnaset2l
glg1a	2.15715e-47	0.259123	0.278	0.082	4.85401e-43	glg1a
pdia3	3.58124e-45	0.334406	0.831	0.425	8.05851e-41	pdia3
cybb	9.10974e-45	0.257931	0.341	0.117	2.04987e-40	cybb
gabarapb	5.20547e-43	0.410967	0.894	0.607	1.17133e-38	gabarapb
rhoab	3.18435e-41	0.325322	0.776	0.42	7.16542e-37	rhoab
b2ml	2.55607e-40	0.35414	0.992	0.875	5.75168e-36	b2ml
cox6a1	3.99109e-40	0.302669	0.785	0.422	8.98075e-36	cox6a1
ubc	4.19116e-38	0.356501	0.957	0.762	9.43094e-34	ubc
zgc:110340.2	4.86782e-37	0.33651	0.522	0.256	1.09536e-32	zgc:110340.2
arl6ip1	1.27096e-35	0.304521	0.397	0.171	2.85992e-31	arl6ip1
tegt	9.50537e-35	0.273764	0.812	0.452	2.1389e-30	tegt
mhc1zba	5.96886e-32	0.490363	0.85	0.661	1.34311e-27	mhc1zba
LOC100150882	4.44622e-28	0.290324	0.307	0.129	1.00049e-23	LOC100150882
msna	1.31816e-27	0.360213	0.31	0.135	2.96612e-23	msna
nme2b.1	8.55412e-23	0.270655	0.977	0.898	1.92485e-18	nme2b.1

## Sheet:  vascular endothelial cells 1
	p_val	avg_log2FC	pct.1	pct.2	p_val_adj	gene
sele	4.82443e-189	1.88013	0.882	0.242	1.08559e-184	sele
cxcl12a	8.88718e-183	1.44326	0.987	0.409	1.99979e-178	cxcl12a
mrc1a	1.42662e-135	1.62435	0.717	0.197	3.21017e-131	mrc1a
rab11fip1b	5.82866e-124	2.28446	0.837	0.496	1.31157e-119	rab11fip1b
stab1	5.08045e-100	1.65541	0.556	0.156	1.1432e-95	stab1
mrc1b	1.42022e-85	1.56559	0.682	0.3	3.19579e-81	mrc1b
csf1b	6.39523e-73	1.59141	0.485	0.158	1.43906e-68	csf1b
grn1	2.26941e-62	0.694927	0.949	0.88	5.10662e-58	grn1
zgc:158463	5.0682e-59	0.798918	1	1	1.14045e-54	zgc:158463
grn2	5.75523e-58	0.822656	0.843	0.733	1.29504e-53	grn2
glula	2.29858e-54	1.47283	0.537	0.256	5.17228e-50	glula
dab2	2.39367e-54	1.39719	0.44	0.164	5.38623e-50	dab2
grb10a	3.30608e-53	1.58896	0.436	0.17	7.43933e-49	grb10a
sh3tc2	6.84014e-53	1.7682	0.391	0.145	1.53917e-48	sh3tc2
kdrl	4.50001e-50	1.19007	0.427	0.159	1.01259e-45	kdrl
stab2	2.08873e-47	1.78388	0.326	0.108	4.70007e-43	stab2
nr2f5	1.28981e-44	1.48992	0.367	0.138	2.90233e-40	nr2f5
mt-rnr2	1.85144e-44	0.99268	0.994	0.993	4.16612e-40	mt-rnr2
dlc	4.60131e-38	1.68086	0.442	0.231	1.03539e-33	dlc
LOC110438439	1.88877e-37	0.930398	0.858	0.827	4.25011e-33	LOC110438439
cpn1	4.00282e-35	1.18937	0.376	0.164	9.00713e-31	cpn1
slco2b1	1.95275e-34	1.41925	0.393	0.191	4.39408e-30	slco2b1
gpr182	2.21095e-33	1.12779	0.322	0.126	4.97508e-29	gpr182
exoc6	9.77269e-32	1.69214	0.423	0.242	2.19905e-27	exoc6
pxk	3.39104e-31	1.62756	0.479	0.307	7.63053e-27	pxk
adra1d	3.46448e-31	1.51893	0.272	0.105	7.79576e-27	adra1d
mafba1	9.5775e-31	0.938742	0.676	0.517	2.15513e-26	mafba
LOC1000041991	2.90241e-30	0.285142	0.88	0.636	6.53101e-26	LOC100004199
tmem176	1.78959e-29	1.17536	0.33	0.145	4.02693e-25	tmem176
cfd.2	2.12844e-28	1.06972	0.311	0.134	4.78941e-24	cfd.2
plvap	6.91617e-28	0.783825	0.315	0.131	1.55628e-23	plvap
sepp1a.1	1.16268e-27	0.842451	0.663	0.512	2.61627e-23	sepp1a.1
si:ch211-145b13.6	4.29087e-27	1.19363	0.316	0.143	9.65533e-23	si:ch211-145b13.6
rapgef5a	1.78739e-26	1.53601	0.273	0.117	4.02198e-22	rapgef5a
hexb	1.39895e-25	0.999439	0.605	0.514	3.14791e-21	hexb
lgmn	1.48518e-25	0.624417	0.83	0.725	3.34195e-21	lgmn
hspg2	1.77169e-24	1.60884	0.273	0.126	3.98666e-20	hspg2
sh3pxd2aa	3.11452e-24	1.38891	0.275	0.127	7.00828e-20	sh3pxd2aa
sepp1a1	9.76246e-24	0.706186	0.695	0.552	2.19675e-19	sepp1a
cxcl18a.1	7.8884e-23	0.907657	0.272	0.119	1.77505e-18	cxcl18a.1
mt-rnr1	1.25921e-22	0.927782	0.886	0.922	2.83348e-18	mt-rnr1
ephb4a	1.88545e-22	1.24438	0.268	0.123	4.24264e-18	ephb4a
ap1b1	4.84878e-22	1.4241	0.436	0.3	1.09107e-17	ap1b1
arrdc3a	3.0143e-21	1.67775	0.404	0.266	6.78277e-17	arrdc3a
mgat1b	1.905e-20	1.44242	0.279	0.141	4.28664e-16	mgat1b
macf1a	1.6675e-19	1.63334	0.459	0.36	3.75221e-15	macf1a
wsb1	1.54062e-18	1.61087	0.429	0.332	3.46671e-14	wsb1
ralgapa2	1.82361e-18	1.51064	0.311	0.185	4.10349e-14	ralgapa2
ahnak	2.24732e-18	1.18723	0.489	0.377	5.05692e-14	ahnak
mtmr8	6.93312e-17	1.65028	0.296	0.179	1.56009e-12	mtmr8
clec14a	3.73911e-16	0.971801	0.264	0.14	8.41375e-12	clec14a
socs3a	1.3256e-15	0.855334	0.614	0.578	2.98286e-11	socs3a
si: ch211-223l2.4	4.93597e-15	1.09966	0.384	0.26	1.11069e-10	si: ch211-223l2.4
fam120c	1.04381e-11	0.312359	0.15	0.338	2.34878e-07	fam120c
marcksl1b	2.6499e-11	0.748871	0.414	0.311	5.96281e-07	marcksl1b
dedd1	3.80237e-11	1.26681	0.493	0.472	8.5561e-07	dedd1
ccdc85b	5.29455e-11	1.06147	0.251	0.155	1.19138e-06	ccdc85b
ddx61	5.52957e-11	0.260533	0.228	0.46	1.24426e-06	ddx61
cd81a	1.15893e-10	0.806273	0.504	0.468	2.60782e-06	cd81a
rab10	4.27839e-10	0.290628	0.144	0.308	9.62723e-06	rab10
srrm1	5.70628e-10	1.36586	0.455	0.453	1.28403e-05	srrm1
myo1cb	6.47758e-10	1.26759	0.376	0.313	1.45758e-05	myo1cb
rab5c	8.8556e-10	0.29069	0.215	0.428	1.99269e-05	rab5c
usp9	9.78617e-10	0.285236	0.154	0.323	2.20208e-05	usp9
tra2a	1.36574e-09	0.257347	0.133	0.284	3.07319e-05	tra2a
LOC100333053	2.84019e-09	0.297785	0.131	0.281	6.39099e-05	LOC100333053
zgc:100918	7.90945e-09	0.290998	0.139	0.286	0.000177979	zgc:100918
gas6	1.22173e-08	0.970892	0.298	0.22	0.000274914	gas6
ostm11	2.81592e-08	0.265698	0.125	0.259	0.000633637	ostm1
pafah1b1a	3.3367e-08	0.357156	0.152	0.3	0.000750825	pafah1b1a
wu:fj29h111	4.05492e-08	0.319788	0.176	0.337	0.000912438	wu:fj29h11
ctsla1	9.77738e-08	0.264019	0.674	0.601	0.00220011	ctsla
ankrd11	1.00335e-07	0.273766	0.24	0.426	0.00225775	ankrd11
crebzf	1.41143e-07	0.318025	0.169	0.321	0.003176	crebzf
vps35	3.13233e-07	0.288597	0.139	0.27	0.00704838	vps35
id11	5.22612e-07	0.458642	0.579	0.537	0.0117598	id1
srsf3b	5.78523e-07	0.38678	0.157	0.297	0.0130179	srsf3b
ctnnb1	7.32125e-07	0.35395	0.163	0.303	0.0164743	ctnnb1
ankrd12	7.76592e-07	0.354591	0.154	0.287	0.0174749	ankrd12
si:ch211-132b12.7	1.26307e-06	1.15318	0.277	0.221	0.0284217	si:ch211-132b12.7
max	2.72611e-06	0.399647	0.206	0.366	0.0613428	max
sf1	2.75903e-06	0.513284	0.135	0.253	0.0620836	sf1
fubp1	2.83962e-06	0.363642	0.135	0.254	0.0638971	fubp1
tob1b	6.11008e-06	0.307388	0.155	0.278	0.137489	tob1b
sltm	6.65999e-06	0.40168	0.144	0.261	0.149863	sltm
txnipa	6.98175e-06	0.330173	0.751	0.844	0.157103	txnipa
yrk	7.6962e-06	0.433582	0.185	0.323	0.17318	yrk
csrnp1b	1.08489e-05	1.12305	0.354	0.338	0.244121	csrnp1b
enosf11	1.31015e-05	0.328612	0.189	0.324	0.29481	enosf1
si:dkey-188i13.101	1.41424e-05	0.306357	0.238	0.405	0.318231	si:dkey-188i13.10
abi2b1	1.43909e-05	0.419007	0.176	0.31	0.323825	abi2b
eif4a1a	1.86029e-05	0.357338	0.223	0.372	0.418603	eif4a1a
srsf2a	1.92379e-05	0.405282	0.208	0.35	0.432891	srsf2a
ccnd2a	1.96831e-05	0.523119	0.215	0.366	0.442909	ccnd2a
prcp	2.62319e-05	1.1367	0.294	0.263	0.590269	prcp
snx17	3.62748e-05	0.548652	0.169	0.292	0.816255	snx17
parp8	4.05027e-05	0.376925	0.17	0.291	0.911393	parp8
ddx3a	4.57728e-05	0.298433	0.174	0.293	1	ddx3a
ip6k2b	4.69065e-05	0.591457	0.176	0.297	1	ip6k2b
si:zfos-2326c3.2	4.80877e-05	0.389058	0.157	0.27	1	si:zfos-2326c3.2
dido1	5.77649e-05	0.627064	0.174	0.296	1	dido1
actn4	6.09589e-05	0.475869	0.255	0.427	1	actn4
cyth1a	6.75415e-05	0.537617	0.242	0.398	1	cyth1a
LOC5626481	7.25828e-05	0.434711	0.189	0.316	1	LOC562648
rbm4.2	8.22557e-05	0.505246	0.18	0.303	1	rbm4.2
sesn1	8.77346e-05	0.835454	0.434	0.435	1	sesn1
u2surp	0.000100092	1.17513	0.358	0.361	1	u2surp
nr1d2a	0.000102618	0.464697	0.208	0.339	1	nr1d2a
wu:fb16f03	0.00010588	0.487645	0.187	0.309	1	wu:fb16f03
ptbp1a	0.000115155	0.530469	0.187	0.313	1	ptbp1a
syncrip	0.000141332	0.508086	0.298	0.492	1	syncrip
s100a10b	0.000146983	0.719128	0.399	0.386	1	s100a10b
si:dkey-7j14.6	0.000149728	0.314334	0.292	0.471	1	si:dkey-7j14.6
snrnp70	0.000163241	0.575178	0.155	0.266	1	snrnp70
qkia	0.000192617	1.1152	0.365	0.367	1	qkia
snx1a	0.000193252	0.461853	0.24	0.389	1	snx1a
acin1b	0.000219784	0.513465	0.178	0.294	1	acin1b
pdk2b	0.000226425	0.349546	0.21	0.331	1	pdk2b
arglu1a	0.00023667	1.25612	0.305	0.292	1	arglu1a
tpte	0.000271939	1.0597	0.281	0.257	1	tpte
atox11	0.000301376	0.311873	0.236	0.377	1	atox1
rxraa1	0.000305277	0.321591	0.189	0.303	1	rxraa
2022-09-02	0.000401113	0.427518	0.221	0.353	1	2022-09-02
igf2b	0.000525393	1.07132	0.275	0.25	1	igf2b
snx9b.1	0.000542781	0.365	0.182	0.29	1	snx9b.1
ogdha	0.000721871	0.486424	0.159	0.257	1	ogdha
npc11	0.00108916	0.40611	0.193	0.303	1	npc1
ewsr1b	0.00118035	0.472082	0.172	0.271	1	ewsr1b
trnau1apb	0.00118373	0.541707	0.178	0.281	1	trnau1apb
zgc:171497	0.00147645	1.05492	0.352	0.373	1	zgc:171497
fam208b	0.00175722	0.636692	0.172	0.269	1	fam208b
cebpd	0.00230685	0.674387	0.275	0.246	1	cebpd
LOC108183674	0.00248797	0.553138	0.182	0.282	1	LOC108183674
LOC108179110	0.00253943	0.582327	0.18	0.278	1	LOC108179110
csde1	0.00273172	0.410229	0.33	0.516	1	csde1
ap2m1a	0.00350144	0.385938	0.296	0.46	1	ap2m1a
si:ch211-199g17.2	0.00379136	1.17212	0.313	0.321	1	si:ch211-199g17.2
smox1	0.00492872	0.768354	0.399	0.432	1	smox
abcc51	0.00620828	1.00837	0.339	0.36	1	abcc5
zgc:110340.21	0.006244	0.79327	0.326	0.308	1	zgc:110340.2
fkbp5	0.00811013	0.474638	0.287	0.43	1	fkbp5
ddx6	0.00872221	0.485322	0.251	0.37	1	ddx6
gnsb1	0.00921776	0.257587	0.287	0.415	1	gnsb
baz2ba	0.00944093	0.620406	0.189	0.282	1	baz2ba

## Sheet: T cells
	p_val	avg_log2FC	pct.1	pct.2	p_val_adj	gene
si:ch211-214p16.1	0	4.78554	0.984	0.248	0	si:ch211-214p16.1
trac	0	4.06181	0.845	0.028	0	trac
LOC100538332	0	3.58747	0.808	0.02	0	LOC100538332
si:ch211-132g1.4	0	3.52735	0.702	0.034	0	si:ch211-132g1.4
si:ch211-165b19.5	0	3.40948	0.51	0.013	0	si:ch211-165b19.5
il2rb	0	2.96607	0.536	0.007	0	il2rb
setbp1	0	2.81744	0.667	0.055	0	setbp1
si:dkey-183p4.10	0	2.67812	0.573	0.015	0	si:dkey-183p4.10
si:dkey-216e24.9	0	2.49249	0.546	0.012	0	si:dkey-216e24.9
zap70	0	2.34045	0.466	0.008	0	zap70
si:ch211-196f2.6	5.82724e-307	2.37424	0.438	0.006	1.31125e-302	si:ch211-196f2.6
scin	2.835e-285	2.28363	0.486	0.019	6.37932e-281	scin
ncaldb	1.14913e-283	2.30458	0.565	0.04	2.58578e-279	ncaldb
si:ch73-40i7.2	3.93002e-281	1.95277	0.421	0.009	8.84333e-277	si:ch73-40i7.2
lipia	1.56487e-279	2.64508	0.464	0.017	3.52127e-275	lipia
si:ch211-165b19.8	1.00006e-278	2.46865	0.401	0.006	2.25034e-274	si:ch211-165b19.8
sla2	1.36889e-276	2.12833	0.415	0.009	3.08027e-272	sla2
dusp2	2.09232e-276	3.38647	0.571	0.045	4.70813e-272	dusp2
LOC103909107	3.24246e-261	2.47257	0.438	0.016	7.29618e-257	LOC103909107
calm1b	5.46055e-253	2.41993	0.754	0.124	1.22873e-248	calm1b
gzm3	6.69554e-246	2.01797	0.355	0.005	1.50663e-241	gzm3
ptpn4b	1.51957e-237	2.02018	0.393	0.014	3.41934e-233	ptpn4b
si:dkey-260g12.1	8.15453e-237	2.26438	0.5	0.041	1.83493e-232	si:dkey-260g12.1
LOC110438134	2.05097e-231	2.14746	0.335	0.005	4.6151e-227	LOC110438134
zbtb32	3.81786e-230	1.9191	0.375	0.012	8.59094e-226	zbtb32
LOC101885675	2.22436e-228	1.7978	0.339	0.006	5.00525e-224	LOC101885675
si:ch73-208g10.1	1.83821e-220	2.3144	0.619	0.086	4.13635e-216	si:ch73-208g10.1
ccl38.6	2.08969e-220	4.42895	0.47	0.039	4.70223e-216	ccl38.6
si:rp71-81e14.2	7.5467e-218	2.31889	0.361	0.012	1.69816e-213	si:rp71-81e14.2
plk3	3.00378e-215	2.82903	0.607	0.089	6.75912e-211	plk3
LOC103908724	6.72411e-214	3.51787	0.946	0.489	1.51306e-209	LOC103908724
lpar6b	6.73892e-207	2.08402	0.413	0.028	1.51639e-202	lpar6b
gzmk	1.19647e-205	1.63029	0.298	0.004	2.69229e-201	gzmk
il7r	5.44184e-201	1.58156	0.294	0.004	1.22452e-196	il7r
btg1	1.27669e-191	2.38021	0.962	0.606	2.87281e-187	btg1
p2rx1	9.9565e-186	1.70548	0.282	0.006	2.24041e-181	p2rx1
ccl34b.4	1.31571e-183	1.79046	0.276	0.005	2.96062e-179	ccl34b.4
si:ch211-119e14.1	5.55995e-182	2.37195	0.847	0.33	1.2511e-177	si:ch211-119e14.1
gzma	8.54004e-182	1.60802	0.266	0.004	1.92168e-177	gzma
ccl36.1	8.94749e-178	3.92642	0.456	0.052	2.01337e-173	ccl36.1
cd40lg	3.4787e-173	1.4527	0.264	0.005	7.82778e-169	cd40lg
LOC101884208	5.74962e-171	1.34399	0.254	0.004	1.29378e-166	LOC101884208
themis	1.68512e-169	1.38368	0.262	0.006	3.79185e-165	themis
scinlb	1.96037e-169	1.82508	0.804	0.206	4.41123e-165	scinlb
si:ch211-226m16.2	4.5394e-167	2.31002	0.812	0.318	1.02146e-162	si:ch211-226m16.2
si:ch211-167j9.5	3.25736e-166	1.61842	0.288	0.011	7.32971e-162	si:ch211-167j9.5
si:ch211-25d12.7	5.18661e-163	1.26571	0.266	0.008	1.16709e-158	si:ch211-25d12.7
si:dkey-183i3.6	8.75236e-163	2.7188	0.31	0.017	1.96946e-158	si:dkey-183i3.6
LOC103910871	3.07978e-161	2.85422	0.702	0.221	6.93012e-157	LOC103910871
hmgn3	2.30667e-156	1.67874	0.351	0.028	5.19047e-152	hmgn3
ptprc	4.16558e-152	1.95369	0.875	0.422	9.37339e-148	ptprc
wasa	1.17414e-151	2.10045	0.633	0.168	2.64205e-147	wasa
si:ch211-105j21.9	2.24889e-151	1.86097	0.496	0.082	5.06046e-147	si:ch211-105j21.9
lbh	7.73063e-151	1.59957	0.415	0.051	1.73955e-146	lbh
gnai2b	6.53624e-150	1.7129	0.444	0.062	1.47078e-145	gnai2b
samsn1b	2.48445e-142	1.58445	0.312	0.024	5.5905e-138	samsn1b
runx3	9.66419e-142	1.85771	0.349	0.034	2.17464e-137	runx3
LOC110439915	7.24028e-138	2.80821	0.714	0.234	1.62921e-133	LOC110439915
agap2	3.60754e-137	1.48677	0.373	0.044	8.11769e-133	agap2
wipf1a	5.70137e-131	1.93857	0.607	0.178	1.28292e-126	wipf1a
pim2	4.23236e-130	2.19145	0.383	0.053	9.52366e-126	pim2
si:dkeyp-85e10.2	1.65904e-129	1.6589	0.353	0.041	3.73318e-125	si:dkeyp-85e10.2
si:ch211-132g1.1	1.97872e-128	1.8834	0.435	0.078	4.45252e-124	si:ch211-132g1.1
LOC101883813	1.32623e-127	1.40134	0.252	0.015	2.98427e-123	LOC101883813
ccni	2.59101e-126	1.53386	0.929	0.637	5.8303e-122	ccni
rpl19	5.12572e-124	1.13213	0.984	0.906	1.15339e-119	rpl19
zgc:153952	1.30956e-122	1.47031	0.369	0.049	2.94678e-118	zgc:153952
id3	3.52352e-121	2.5361	0.688	0.266	7.92863e-117	id3
rplp1	3.62354e-120	0.953387	0.994	0.955	8.15368e-116	rplp1
gpr183a	3.19294e-117	2.06027	0.573	0.163	7.18475e-113	gpr183a
zgc:152774	5.54833e-117	1.41802	0.321	0.037	1.24849e-112	zgc:152774
b3gnt5a	1.31767e-116	1.69547	0.351	0.048	2.96502e-112	b3gnt5a
mcl1a	6.68476e-116	1.50954	0.929	0.693	1.50421e-111	mcl1a
si:ch211-67e16.3	6.938e-116	1.93955	0.296	0.03	1.56119e-111	si:ch211-67e16.3
si:dkey-185m8.2	2.13368e-115	1.83004	0.488	0.103	4.80121e-111	si:dkey-185m8.2
rps2	8.39012e-115	0.926735	0.986	0.928	1.88794e-110	rps2
wasb	8.54279e-115	1.62055	0.802	0.387	1.9223e-110	wasb
rasal3	2.15029e-113	1.36254	0.353	0.049	4.83857e-109	rasal3
rps17	2.13241e-111	1.20044	0.952	0.812	4.79835e-107	rps17
dock10	1.57374e-109	1.68078	0.345	0.052	3.54123e-105	dock10
rps14	3.09983e-107	0.917953	0.99	0.938	6.97524e-103	rps14
rpl8	1.81138e-106	0.979355	0.978	0.906	4.07597e-102	rpl8
rsl24d1	2.06477e-106	1.44218	0.885	0.619	4.64615e-102	rsl24d1
rps26l	1.23094e-104	0.987204	0.974	0.896	2.76985e-100	rps26l
LOC108180146	1.11197e-103	2.22999	0.74	0.337	2.50216e-99	LOC108180146
tox2	2.2105e-103	1.47707	0.308	0.041	4.97407e-99	tox2
hcst	2.90105e-102	1.43515	0.327	0.05	6.52795e-98	hcst
rpl35	7.6152e-101	1.01022	0.966	0.88	1.71357e-96	rpl35
cyth4a	2.30564e-100	1.28936	0.272	0.031	5.18816e-96	cyth4a
rps27.1	3.77525e-98	0.839003	0.978	0.919	8.49506e-94	rps27.1
serbp1a	1.20326e-97	1.26192	0.893	0.661	2.70758e-93	serbp1a
lpar5a	1.9325e-97	1.74356	0.627	0.24	4.34852e-93	lpar5a
rps11	2.31569e-95	0.829063	0.984	0.908	5.21077e-91	rps11
arhgdig	3.57387e-94	1.31624	0.839	0.496	8.04193e-90	arhgdig
s1pr4	5.51328e-94	1.93097	0.373	0.072	1.2406e-89	s1pr4
fam49a	7.86437e-93	1.61935	0.472	0.134	1.76964e-88	fam49a
naca	2.69054e-92	0.996833	0.952	0.818	6.05425e-88	naca
LOC101884253	6.37573e-92	1.28827	0.284	0.039	1.43467e-87	LOC101884253
def6a	6.26853e-90	1.33222	0.373	0.077	1.41055e-85	def6a
rpl13	1.15551e-89	0.77965	0.98	0.936	2.60013e-85	rpl13
hsp90ab1	4.53033e-89	0.894979	0.99	0.913	1.01941e-84	hsp90ab1
eef1g	7.11002e-89	1.04646	0.935	0.773	1.5999e-84	eef1g
rps21	1.65652e-88	0.779547	0.982	0.913	3.7275e-84	rps21
rpsa	1.89957e-88	0.790493	0.988	0.931	4.27441e-84	rpsa
rpl23	1.59139e-85	0.822445	0.986	0.941	3.58094e-81	rpl23
arrdc3b	7.19653e-83	1.69043	0.55	0.199	1.61936e-78	arrdc3b
LOC108190717	1.23092e-81	2.80653	0.351	0.072	2.76982e-77	LOC108190717
rpl36	2.37868e-81	0.781558	0.984	0.899	5.3525e-77	rpl36
rps16	3.44815e-81	0.792096	0.98	0.899	7.75902e-77	rps16
rps5	5.14304e-81	0.87256	0.968	0.903	1.15729e-76	rps5
uba52	6.37674e-79	0.742039	0.982	0.933	1.43489e-74	uba52
si:dkey-27i16.2	1.26569e-78	1.46877	0.639	0.257	2.84805e-74	si:dkey-27i16.2
rps9	2.61242e-78	0.728494	0.984	0.915	5.87848e-74	rps9
faua	2.65795e-77	0.774811	0.978	0.895	5.98091e-73	faua
prkacba	1.24416e-76	1.24831	0.329	0.069	2.79961e-72	prkacba
rpl7	1.83555e-76	0.85985	0.952	0.881	4.13036e-72	rpl7
arhgef3l	3.31795e-76	1.14426	0.3	0.056	7.46605e-72	arhgef3l
myh11a	3.76321e-76	1.08258	0.393	0.095	8.46798e-72	myh11a
rplp0	5.88898e-76	0.787904	0.98	0.916	1.32514e-71	rplp0
rps29	1.67722e-74	0.741907	0.978	0.898	3.77407e-70	rps29
LOC103909115	1.12534e-73	1.23301	0.714	0.381	2.53225e-69	LOC103909115
rpl11	3.56633e-72	0.682346	0.986	0.923	8.02496e-68	rpl11
zgc:152863	1.21638e-71	1.41515	0.268	0.047	2.7371e-67	zgc:152863
rpl17	2.05282e-71	0.728969	0.98	0.91	4.61925e-67	rpl17
rpl18a	4.46146e-71	0.79197	0.976	0.891	1.00392e-66	rpl18a
rpl14	3.0866e-70	0.62909	0.99	0.932	6.94547e-66	rpl14
rpl31	1.86564e-69	0.740336	0.98	0.91	4.19807e-65	rpl31
rps20	5.88189e-69	0.666463	0.994	0.954	1.32354e-64	rps20
rps24	1.06467e-68	0.705394	0.98	0.927	2.39572e-64	rps24
rpl24	4.11283e-68	0.634837	0.986	0.941	9.25468e-64	rpl24
rpl27	5.38815e-68	0.779378	0.966	0.87	1.21244e-63	rpl27
arpc1b	6.32127e-67	1.2372	0.851	0.564	1.42241e-62	arpc1b
si:ch73-203a8.1	3.07891e-66	1.48027	0.526	0.222	6.92815e-62	si:ch73-203a8.1
rpl28	3.60097e-66	0.655342	0.98	0.917	8.10289e-62	rpl28
ets1	6.31349e-66	1.10655	0.266	0.05	1.42066e-61	ets1
rps7	2.2225e-65	0.759601	0.968	0.892	5.00107e-61	rps7
rpl37	2.49238e-65	0.707657	0.98	0.932	5.60836e-61	rpl37
sat1a.2	3.09721e-64	1.23794	0.772	0.518	6.96935e-60	sat1a.2
ywhaqa	3.42909e-64	1.51737	0.655	0.371	7.71615e-60	ywhaqa
hmha1b	2.12126e-63	1.23591	0.458	0.156	4.77325e-59	hmha1b
mknk2b	3.65242e-62	1.50332	0.444	0.161	8.21869e-58	mknk2b
rps23	8.44079e-62	0.650184	0.976	0.919	1.89935e-57	rps23
rpl34	1.05338e-61	0.725366	0.96	0.896	2.37032e-57	rpl34
rpl10.2	1.07124e-61	1.24944	0.784	0.626	2.41051e-57	rpl10.2
LOC108179332	1.74486e-61	1.41574	0.292	0.065	3.92629e-57	LOC108179332
cxcr4b	2.24418e-60	1.63867	0.812	0.563	5.04985e-56	cxcr4b
pnrc2	2.95001e-60	1.38661	0.659	0.384	6.63812e-56	pnrc2
rplp2l	6.83991e-60	0.711882	0.99	0.945	1.53912e-55	rplp2l
rps15a	9.78043e-60	0.645911	0.974	0.907	2.20079e-55	rps15a
zgc:194659	4.08539e-59	1.27352	0.278	0.063	9.19295e-55	zgc:194659
tnrc6c1	1.83678e-58	1.36326	0.645	0.354	4.13311e-54	tnrc6c1
zgc:171772	3.5656e-58	0.61631	0.986	0.943	8.02332e-54	zgc:171772
ikzf1	6.65914e-58	1.27427	0.333	0.095	1.49844e-53	ikzf1
zmp:0000001082	8.72356e-58	1.46757	0.466	0.188	1.96298e-53	zmp:0000001082
rpl7a	5.33555e-57	0.669553	0.968	0.904	1.20061e-52	rpl7a
rps10	7.68985e-57	0.609282	0.976	0.934	1.73037e-52	rps10
LOC100535806	1.52395e-55	1.46751	0.325	0.096	3.42918e-51	LOC100535806
fam129ab	4.39452e-55	0.943732	0.254	0.054	9.88854e-51	fam129ab
rps8a	7.59173e-55	0.60365	0.97	0.907	1.70829e-50	rps8a
grap2a	1.46066e-53	1.2969	0.468	0.204	3.28677e-49	grap2a
socs1a	1.58478e-53	1.47668	0.365	0.118	3.56607e-49	socs1a
pik3r1	2.66306e-53	1.3819	0.488	0.223	5.99242e-49	pik3r1
rpl18	4.92601e-53	0.602955	0.966	0.922	1.10845e-48	rpl18
rpl15	7.36903e-53	0.732022	0.954	0.866	1.65818e-48	rpl15
unc13d	7.59524e-53	0.9456	0.286	0.071	1.70908e-48	unc13d
tefa	4.00235e-52	1.32954	0.504	0.228	9.00608e-48	tefa
rps25	5.90786e-52	0.576975	0.972	0.925	1.32939e-47	rps25
rpl35a	6.15462e-52	0.615839	0.956	0.904	1.38491e-47	rpl35a
tes	7.19388e-52	1.10483	0.345	0.108	1.61877e-47	tes
si:rp71-68n21.9.1	3.11332e-50	1.27424	0.306	0.092	7.00559e-46	si:rp71-68n21.9.1
rab44	5.1457e-50	1.23558	0.577	0.286	1.15788e-45	rab44
si:ch73-248e21.7.1	9.23609e-50	1.40374	0.508	0.236	2.07831e-45	si:ch73-248e21.7.1
rps28	1.73769e-49	0.547952	0.99	0.931	3.91016e-45	rps28
rpl26	2.52465e-49	0.622155	0.986	0.931	5.68097e-45	rpl26
LOC798168	2.95675e-49	1.22063	0.304	0.088	6.65327e-45	LOC798168
rpl5a	1.27904e-48	0.740771	0.877	0.749	2.87809e-44	rpl5a
rps26	2.15919e-48	0.676961	0.933	0.862	4.85861e-44	rps26
rps3	7.12695e-48	0.705764	0.931	0.814	1.60371e-43	rps3
rpl22	1.06399e-47	0.65816	0.933	0.849	2.39419e-43	rpl22
sort1b	1.45585e-47	1.25368	0.377	0.139	3.27595e-43	sort1b
dub	5.86369e-47	0.953916	0.409	0.148	1.31945e-42	dub
glipr1a	8.55363e-47	0.934191	0.321	0.094	1.92474e-42	glipr1a
rpl9	1.80173e-46	0.5727	0.964	0.901	4.05425e-42	rpl9
rplp2	2.17665e-46	0.51994	0.986	0.954	4.89789e-42	rplp2
LOC101882500	2.17783e-46	1.16639	0.419	0.167	4.90056e-42	LOC101882500
LOC101885164	5.71234e-46	1.21883	0.552	0.295	1.28539e-41	LOC101885164
nsa2	9.30766e-46	0.892478	0.794	0.6	2.09441e-41	nsa2
rps19	3.74003e-45	0.476821	0.986	0.935	8.41582e-41	rps19
tpm1	3.94415e-44	0.935974	0.379	0.14	8.87512e-40	tpm1
gnb2l1	1.00202e-43	0.584478	0.96	0.87	2.25475e-39	gnb2l1
ppiaa	1.74104e-43	0.711321	0.946	0.86	3.91769e-39	ppiaa
rps4x	3.27016e-43	0.569969	0.946	0.87	7.35852e-39	rps4x
LOC561000	5.62412e-43	1.22398	0.373	0.146	1.26554e-38	LOC561000
myl12.1	5.91264e-43	0.829853	0.835	0.625	1.33046e-38	myl12.1
cirbpb	9.15915e-43	0.681018	0.933	0.79	2.06099e-38	cirbpb
tpt1	1.03722e-42	0.58466	0.931	0.819	2.33394e-38	tpt1
fmnl1a	1.36921e-42	1.31062	0.399	0.172	3.08099e-38	fmnl1a
hmga1a	1.64157e-41	0.976224	0.591	0.335	3.69386e-37	hmga1a
celf2	4.91734e-41	0.902003	0.76	0.539	1.1065e-36	celf2
mafa	1.54286e-40	1.37919	0.258	0.078	3.47174e-36	mafa
atp2a3	5.05816e-40	0.90566	0.268	0.08	1.13819e-35	atp2a3
LOC799279	6.77584e-40	1.29612	0.317	0.116	1.5247e-35	LOC799279
pfn1	7.66031e-40	0.566233	0.994	0.899	1.72372e-35	pfn1
LOC100537803	2.09236e-39	0.958543	0.637	0.386	4.70822e-35	LOC100537803
rpl32.1	2.40452e-39	0.678723	0.927	0.792	5.41066e-35	rpl32.1
klf3.1	4.349e-39	1.36799	0.254	0.075	9.78612e-35	klf3.1
rps18	1.05726e-37	0.655116	0.909	0.8	2.37905e-33	rps18
tnip1	6.7656e-36	1.19714	0.308	0.121	1.5224e-31	tnip1
ptpn6	1.63516e-35	1.44539	0.54	0.34	3.67943e-31	ptpn6
psmb9a1	4.05287e-35	1.04488	0.542	0.342	9.11976e-31	psmb9a
fgd	4.80323e-35	1.01113	0.256	0.083	1.08082e-30	fgd
tagapb	6.31937e-35	1.11039	0.306	0.119	1.42199e-30	tagapb
sumo2b	1.53299e-34	0.983764	0.633	0.437	3.44953e-30	sumo2b
eif3f	7.40453e-34	0.742677	0.766	0.627	1.66617e-29	eif3f
pabpc1a	1.30661e-33	0.615653	0.879	0.731	2.94013e-29	pabpc1a
b2m1	1.99969e-33	0.542885	0.994	0.948	4.4997e-29	b2m
ifit11	3.26144e-32	1.17725	0.351	0.158	7.33888e-28	ifit11
il21r.11	1.53175e-31	1.114	0.375	0.182	3.44675e-27	il21r.1
cpne1	1.94085e-31	1.02378	0.514	0.324	4.3673e-27	cpne1
slc25a5	6.08834e-31	0.333444	0.962	0.933	1.37e-26	slc25a5
gtpbp4	1.22511e-30	0.964714	0.51	0.312	2.75675e-26	gtpbp4
mhc1uka1	1.60816e-30	1.1278	0.562	0.369	3.61868e-26	mhc1uka
rps6	3.22872e-29	0.477828	0.921	0.839	7.26525e-25	rps6
gbp	3.29166e-29	0.966937	0.458	0.262	7.40689e-25	gbp
rpl5b	1.29346e-28	0.6294	0.782	0.661	2.91055e-24	rpl5b
si:ch73-248e21.5.1	2.4277e-28	0.871915	0.337	0.154	5.46281e-24	si:ch73-248e21.5.1
ran	4.13122e-28	0.634248	0.748	0.59	9.29608e-24	ran
ppp2r5cb	7.74421e-28	1.09602	0.312	0.144	1.7426e-23	ppp2r5cb
vaspa	8.04715e-28	0.936504	0.276	0.112	1.81077e-23	vaspa
LOC1001510491	8.57112e-28	0.644823	0.851	0.633	1.92867e-23	LOC100151049
btg2	1.99369e-27	1.23412	0.427	0.236	4.4862e-23	btg2
rpl23a	6.05067e-27	0.453606	0.921	0.832	1.36152e-22	rpl23a
nrros	2.08787e-26	1.29875	0.321	0.156	4.69812e-22	nrros
si:dkey-85p17.3.1	3.23029e-26	0.918878	0.272	0.113	7.26881e-22	si:dkey-85p17.3.1
lasp1	3.94914e-26	0.757937	0.649	0.494	8.88636e-22	lasp1
eif3m	1.27252e-25	0.674409	0.671	0.525	2.86342e-21	eif3m
zfp36l1a	1.62272e-25	0.828364	0.667	0.511	3.65146e-21	zfp36l1a
arhgef1b	2.15687e-25	0.926715	0.492	0.317	4.85339e-21	arhgef1b
LOC101886015	2.84814e-25	1.00255	0.306	0.14	6.40889e-21	LOC101886015
si:dkey-262k9.4	8.41837e-25	0.749752	0.3	0.129	1.8943e-20	si:dkey-262k9.4
ube2e1	9.31592e-25	0.819367	0.375	0.199	2.09627e-20	ube2e1
rpl27a	1.24333e-24	0.596499	0.768	0.62	2.79773e-20	rpl27a
zgc:640511	1.41289e-24	0.620921	0.742	0.55	3.17929e-20	zgc:64051
rac21	5.97515e-24	0.594526	0.762	0.511	1.34453e-19	rac2
eif3g	5.56246e-23	0.718425	0.617	0.47	1.25166e-18	eif3g
msna.11	7.48435e-23	0.626199	0.75	0.544	1.68413e-18	msna.1
fli1b	1.68474e-22	0.907472	0.397	0.234	3.79101e-18	fli1b
rpl3	1.16449e-21	0.447362	0.938	0.863	2.62033e-17	rpl3
s1pr5a	1.47637e-21	1.0274	0.276	0.124	3.32212e-17	s1pr5a
rnf44	1.74966e-21	0.900698	0.276	0.131	3.93708e-17	rnf44
syne1b	2.29489e-21	0.877221	0.308	0.152	5.16396e-17	syne1b
pde7a	6.00058e-21	0.814453	0.329	0.171	1.35025e-16	pde7a
b2ml1	6.86944e-21	0.453571	0.982	0.887	1.54576e-16	b2ml
h1fx	7.8502e-21	1.02079	0.673	0.556	1.76645e-16	h1fx
LOC558761	2.78648e-20	0.820327	0.323	0.174	6.27014e-16	LOC558761
ptmab	5.94015e-20	0.478917	0.817	0.701	1.33665e-15	ptmab
rpl38	7.91763e-20	0.414174	0.933	0.849	1.78162e-15	rpl38
si:ch211-214p16.2	8.55407e-20	0.645671	0.329	0.163	1.92484e-15	si:ch211-214p16.2
gnb1a	1.05265e-19	0.672849	0.694	0.547	2.36868e-15	gnb1a
nfkbiaa	1.09469e-19	0.970845	0.464	0.308	2.46327e-15	nfkbiaa
LOC1104384721	1.12923e-19	0.999402	0.399	0.248	2.541e-15	LOC110438472
rpl22l1	1.14628e-19	0.844661	0.593	0.483	2.57935e-15	rpl22l1
LOC100536657	1.47799e-19	0.812113	0.266	0.128	3.32578e-15	LOC100536657
ptp4a2b	3.12657e-19	0.999803	0.431	0.294	7.03541e-15	ptp4a2b
eif3ea	3.15893e-19	0.725445	0.508	0.373	7.10823e-15	eif3ea
dnase1l4.2	5.17219e-19	0.858992	0.323	0.18	1.16385e-14	dnase1l4.2
hsf2	5.19507e-19	0.926355	0.254	0.121	1.169e-14	hsf2
notch2	1.35144e-18	0.932556	0.377	0.233	3.041e-14	notch2
arhgdia	1.47556e-18	0.698598	0.597	0.478	3.32029e-14	arhgdia
crip1	1.68702e-18	0.34836	0.72	0.54	3.79614e-14	crip1
eef2b	2.06192e-18	0.433831	0.808	0.711	4.63974e-14	eef2b
sept7a	2.10102e-18	0.775463	0.306	0.164	4.72771e-14	sept7a
eef1da	7.67675e-18	0.659216	0.631	0.513	1.72742e-13	eef1da
LOC100151196	1.08187e-17	0.741133	0.296	0.156	2.43442e-13	LOC100151196
zgc:153409	1.57288e-17	0.812642	0.423	0.284	3.53929e-13	zgc:153409
si:dkey-222f8.3	5.70284e-17	0.806116	0.409	0.274	1.28325e-12	si:dkey-222f8.3
arl6ip5b	5.98066e-17	0.826543	0.294	0.164	1.34577e-12	arl6ip5b
sesn11	9.98454e-17	0.634882	0.569	0.416	2.24672e-12	sesn1
si:dkey-100n23.5	1.26518e-16	0.707294	0.512	0.377	2.84692e-12	si:dkey-100n23.5
romo1	1.26683e-16	0.515707	0.72	0.597	2.85061e-12	romo1
oaz1b	3.55377e-16	0.588855	0.609	0.492	7.99668e-12	oaz1b
ankrd121	4.16758e-16	0.851716	0.387	0.251	9.37788e-12	ankrd12
serf2	4.85918e-16	0.51373	0.635	0.511	1.09341e-11	serf2
itgb2	6.76585e-16	0.689381	0.446	0.306	1.52245e-11	itgb2
hnrnpa0l	7.58973e-16	0.627092	0.633	0.526	1.70784e-11	hnrnpa0l
apbb1ip	1.20667e-15	0.850905	0.284	0.162	2.71525e-11	apbb1ip
ef1	1.65347e-15	0.873326	0.454	0.336	3.72065e-11	ef1
setb	4.65694e-15	0.731027	0.472	0.352	1.04791e-10	setb
nme2b.11	5.17544e-15	0.324517	0.97	0.906	1.16458e-10	nme2b.1
rhogb	6.06143e-15	0.805844	0.452	0.327	1.36394e-10	rhogb
glrx	1.17239e-14	0.713371	0.548	0.452	2.63812e-10	glrx
tmem131l	1.21256e-14	0.818955	0.395	0.272	2.7285e-10	tmem131l
kmt2a	1.41177e-14	0.734063	0.333	0.205	3.17676e-10	kmt2a
syk	1.51993e-14	1.09601	0.349	0.237	3.42015e-10	syk
fermt3b	1.73665e-14	0.782562	0.25	0.132	3.90781e-10	fermt3b
zgc:112356	3.99822e-14	0.702115	0.256	0.141	8.9968e-10	zgc:112356
mob1a.1	4.4296e-14	0.588133	0.484	0.358	9.96748e-10	mob1a.1
kctd5a	6.06417e-14	0.670903	0.5	0.384	1.36456e-09	kctd5a
pbxip1b	6.1182e-14	0.687895	0.284	0.163	1.37672e-09	pbxip1b
cdkn1bb	6.58631e-14	0.797412	0.361	0.243	1.48205e-09	cdkn1bb
mid1ip1l	9.93257e-14	0.575667	0.383	0.246	2.23503e-09	mid1ip1l
ube2d2	1.55245e-13	0.671114	0.508	0.406	3.49333e-09	ube2d2
gng5	1.8014e-13	0.616253	0.504	0.396	4.05352e-09	gng5
ier2a	2.10252e-13	0.815263	0.478	0.359	4.7311e-09	ier2a
kdm6bb	2.36755e-13	0.748576	0.304	0.185	5.32747e-09	kdm6bb
cd82b	2.62434e-13	0.774593	0.331	0.211	5.9053e-09	cd82b
irf2bp2a	5.1733e-13	0.643373	0.48	0.373	1.1641e-08	irf2bp2a
thrap3b	6.84235e-13	0.848222	0.389	0.281	1.53966e-08	thrap3b
ybx1	1.02975e-12	0.323407	0.859	0.762	2.31714e-08	ybx1
ncor2	1.69012e-12	0.846959	0.317	0.206	3.80311e-08	ncor2
rpl29	2.69195e-12	0.254957	0.954	0.9	6.05742e-08	rpl29
LOC101884451	3.27116e-12	0.619012	0.345	0.223	7.36077e-08	LOC101884451
psmb8a	3.58948e-12	0.518572	0.575	0.484	8.07704e-08	psmb8a
arhgap15	4.43087e-12	0.766177	0.282	0.176	9.97035e-08	arhgap15
papd5	5.49464e-12	0.812919	0.254	0.15	1.2364e-07	papd5
im:71540361	5.83109e-12	0.858721	0.375	0.272	1.31211e-07	im:7154036
tpi1b	9.70532e-12	0.646134	0.339	0.228	2.18389e-07	tpi1b
mxd4	1.7254e-11	0.712148	0.254	0.151	3.8825e-07	mxd4
sept7b	3.54162e-11	0.624782	0.367	0.261	7.96935e-07	sept7b
h3f3d	4.12364e-11	0.380282	0.7	0.595	9.27901e-07	h3f3d
fosab	4.2032e-11	1.27113	0.369	0.26	9.45803e-07	fosab
2022-09-21	5.08871e-11	0.44609	0.438	0.32	1.14506e-06	2022-09-02
ndfip2	7.47945e-11	0.673259	0.25	0.151	1.68303e-06	ndfip2
arf6a	7.69632e-11	0.71157	0.371	0.272	1.73183e-06	arf6a
hnrnpaba	7.98612e-11	0.481187	0.585	0.499	1.79704e-06	hnrnpaba
dap1b	1.01715e-10	0.668307	0.357	0.253	2.28878e-06	dap1b
zgc:1530731	1.55242e-10	0.454208	0.52	0.393	3.49325e-06	zgc:153073
fam49ba	1.61941e-10	0.663441	0.31	0.211	3.64399e-06	fam49ba
wu:fi15d04	2.00502e-10	0.629482	0.442	0.347	4.5117e-06	wu:fi15d04
map2k6	3.06186e-10	0.879531	0.288	0.194	6.88979e-06	map2k6
cnbpb	3.61645e-10	0.517787	0.538	0.459	8.13774e-06	cnbpb
rpl4	4.98341e-10	0.388187	0.766	0.711	1.12137e-05	rpl4
irf1b1	5.87497e-10	0.901267	0.367	0.272	1.32198e-05	irf1b
setd8a	8.65028e-10	0.669291	0.25	0.16	1.94649e-05	setd8a
gnai2a	8.90947e-10	0.541578	0.49	0.404	2.00481e-05	gnai2a
arpc3	1.88679e-09	0.36797	0.653	0.555	4.24566e-05	arpc3
stk101	3.62634e-09	0.783468	0.319	0.232	8.15999e-05	stk10
plekho2	4.53547e-09	0.653321	0.292	0.201	0.000102057	plekho2
cry1aa	5.78489e-09	0.439774	0.25	0.154	0.000130172	cry1aa
nmi	5.83795e-09	0.635865	0.353	0.271	0.000131366	nmi
ms4a17a.61	6.65319e-09	0.641753	0.371	0.278	0.00014971	ms4a17a.6
ddx611	1.12695e-08	0.457584	0.502	0.417	0.000253587	ddx61
zgc:92744	1.2701e-08	0.482418	0.552	0.486	0.000285797	zgc:92744
grap2b1	1.3977e-08	0.485579	0.421	0.331	0.000314511	grap2b
fb06f03.2	1.50012e-08	0.491116	0.399	0.313	0.000337558	fb06f03.2
clic1	1.70116e-08	0.436663	0.494	0.416	0.000382794	clic1
ywhaba	2.42513e-08	0.4854	0.496	0.429	0.000545703	ywhaba
arpc2	3.33379e-08	0.291927	0.663	0.579	0.000750168	arpc2
rps27.2	3.93941e-08	0.251189	0.869	0.784	0.000886446	rps27.2
arf6b	4.11321e-08	0.645738	0.304	0.224	0.000925554	arf6b
elmo1	6.24285e-08	0.528478	0.304	0.219	0.00140477	elmo1
chd2	8.24856e-08	0.42461	0.643	0.577	0.00185609	chd2
nfkbie	8.40937e-08	0.584099	0.327	0.244	0.00189228	nfkbie
si:dkey-42i9.4	9.52815e-08	0.48678	0.343	0.262	0.00214402	si:dkey-42i9.4
cyth1a1	1.30279e-07	0.521415	0.438	0.368	0.00293155	cyth1a
si:ch1073-429i10.3	1.83562e-07	0.399729	0.484	0.413	0.00413051	si:ch1073-429i10.3
tnfaip8l2a	2.67706e-07	0.574221	0.258	0.182	0.00602393	tnfaip8l2a
jpt1b	3.07532e-07	0.554449	0.292	0.208	0.00692009	jpt1b
LOC103910438	3.55057e-07	0.495371	0.296	0.214	0.0079895	LOC103910438
LOC110438871	5.68604e-07	0.595759	0.325	0.251	0.0127947	LOC110438871
tln1	6.25279e-07	0.347623	0.571	0.506	0.01407	tln1
bhlhe40	8.11328e-07	0.611282	0.371	0.287	0.0182565	bhlhe40
pik3cd1	1.00872e-06	0.564447	0.264	0.191	0.0226981	pik3cd
si:ch211-217k17.7	1.11039e-06	0.614023	0.254	0.181	0.024986	si:ch211-217k17.7
ncl	1.41741e-06	0.497706	0.48	0.429	0.0318945	ncl
psmb10	1.83485e-06	0.514937	0.361	0.293	0.0412878	psmb10
erh	1.85429e-06	0.419886	0.45	0.392	0.0417253	erh
si:ch211-213a13.11	1.96098e-06	0.427612	0.46	0.398	0.0441259	si:ch211-213a13.1
reep5	2.41369e-06	0.448544	0.389	0.326	0.0543129	reep5
ddx21	3.26426e-06	0.491377	0.379	0.315	0.0734524	ddx21
mhc1zba1	3.78253e-06	0.406418	0.748	0.693	0.0851144	mhc1zba
sub1a	4.5249e-06	0.568167	0.337	0.276	0.101819	sub1a
midn	4.98854e-06	0.662867	0.327	0.258	0.112252	midn
eif3ha	5.46929e-06	0.395559	0.377	0.314	0.12307	eif3ha
eef1b2	6.75134e-06	0.252402	0.788	0.726	0.151919	eef1b2
capza1a1	8.82277e-06	0.356776	0.53	0.476	0.19853	capza1a
LOC100331484	1.16806e-05	0.943786	0.302	0.243	0.262836	LOC100331484
gskip	1.75708e-05	0.530596	0.25	0.191	0.395379	gskip
atf7ip	1.91608e-05	0.691506	0.29	0.237	0.431157	atf7ip
kiaa00401	1.94572e-05	0.501884	0.319	0.258	0.437825	kiaa0040
zgc:1723521	3.25657e-05	0.525135	0.321	0.266	0.732793	zgc:172352
rhoab1	4.5427e-05	0.362232	0.544	0.485	1	rhoab
ankrd111	4.89949e-05	0.46131	0.444	0.394	1	ankrd11
klf6a	8.11125e-05	0.423084	0.458	0.408	1	klf6a
psmb12	9.12927e-05	0.406909	0.423	0.378	1	psmb12
cct6a	9.23929e-05	0.391492	0.387	0.341	1	cct6a
nop53	0.000125833	0.441169	0.367	0.314	1	nop53
htatip2	0.000137675	0.374657	0.27	0.213	1	htatip2
arpc4	0.000138359	0.322293	0.435	0.388	1	arpc4
wu:fb55g09	0.0001867	0.350326	0.621	0.571	1	wu:fb55g09
susd6	0.000187543	0.620763	0.29	0.243	1	susd6
arpc5a	0.000190784	0.480441	0.302	0.254	1	arpc5a
eif5a	0.000204815	0.315024	0.5	0.469	1	eif5a
capns1a	0.000257859	0.407986	0.29	0.243	1	capns1a
tsc22d3	0.000267808	0.408931	0.448	0.407	1	tsc22d3
si:ch211-66e2.3	0.000319717	0.806187	0.331	0.302	1	si:ch211-66e2.3
hnrnpa1b	0.000480367	0.516432	0.321	0.286	1	hnrnpa1b
hnrnpabb	0.000483657	0.366604	0.415	0.382	1	hnrnpabb
limd2	0.000540911	0.3328	0.264	0.212	1	limd2
cox17	0.000550209	0.43459	0.323	0.282	1	cox17
dnaja2	0.0005674	0.316196	0.44	0.409	1	dnaja2
tra2a1	0.00070766	0.29138	0.304	0.257	1	tra2a
parvg	0.000723443	0.586453	0.268	0.226	1	parvg
sumo3a	0.000732868	0.374267	0.367	0.335	1	sumo3a
pik3cg	0.000878584	0.379052	0.268	0.222	1	pik3cg
nfkbiab	0.00107398	0.342258	0.577	0.532	1	nfkbiab
zgc:92027.1	0.00115362	0.401162	0.353	0.325	1	zgc:92027.1
LOC103911430	0.0012753	0.516353	0.266	0.226	1	LOC103911430
ciarta	0.00152917	0.478763	0.266	0.225	1	ciarta
hcls11	0.00154599	0.298995	0.474	0.419	1	hcls1
rad21a	0.00163484	0.491236	0.27	0.234	1	rad21a
eif4ebp2	0.00199328	0.386136	0.343	0.311	1	eif4ebp2
eif3s6ip	0.00200452	0.325804	0.294	0.257	1	eif3s6ip
ppdpfb	0.00220167	0.252077	0.542	0.501	1	ppdpfb
ifi35	0.00238656	0.400455	0.296	0.26	1	ifi35
rpl6	0.00247386	0.276182	0.764	0.733	1	rpl6
psme21	0.00250919	0.279614	0.502	0.453	1	psme2
si:zfos-2326c3.21	0.00280992	0.495638	0.284	0.25	1	si:zfos-2326c3.2
ola1	0.00291704	0.38727	0.385	0.369	1	ola1
histh1l	0.00347525	0.386077	0.538	0.506	1	histh1l
junba	0.00356513	0.611559	0.276	0.24	1	junba
eif3c	0.0054145	0.308644	0.419	0.415	1	eif3c
dusp1	0.00611233	0.681879	0.345	0.327	1	dusp1
syf2	0.00628865	0.510681	0.272	0.249	1	syf2
ywhabl	0.00949071	0.342438	0.474	0.469	1	ywhabl

## Sheet: vascular endothelial cells 2
	p_val	avg_log2FC	pct.1	pct.2	p_val_adj	gene
plvap1	0	3.07975	0.768	0.073	0	plvap
mrc1a1	0	2.9324	0.931	0.178	0	mrc1a
kdrl1	0	2.81561	0.899	0.1	0	kdrl
gpr1821	0	2.55328	0.751	0.072	0	gpr182
csf1b1	0	2.51913	0.867	0.112	0	csf1b
stab11	0	2.50467	0.875	0.121	0	stab1
ldb2a	0	2.36205	0.738	0.045	0	ldb2a
ephb4a1	0	2.15533	0.725	0.063	0	ephb4a
fam174b	0	2.06109	0.665	0.045	0	fam174b
sele1	4.76127e-302	3.00399	0.976	0.242	1.07138e-297	sele
dab21	2.42983e-301	2.50638	0.832	0.116	5.46761e-297	dab2
grb10a1	8.26579e-300	2.26807	0.858	0.118	1.85997e-295	grb10a
nr2f51	1.7756e-298	2.17485	0.778	0.086	3.99546e-294	nr2f5
si:ch211-145b13.61	1.82876e-288	2.28302	0.755	0.087	4.11508e-284	si:ch211-145b13.6
clec14a1	3.33951e-284	2.26417	0.723	0.08	7.51456e-280	clec14a
cxcl18a.11	1.00019e-277	2.48258	0.675	0.067	2.25062e-273	cxcl18a.1
tmem88a	1.43397e-276	1.85305	0.57	0.036	3.22671e-272	tmem88a
notch1b	1.25615e-271	2.09944	0.656	0.063	2.82658e-267	notch1b
rapgef5a1	6.74891e-270	1.91481	0.677	0.065	1.51864e-265	rapgef5a
tmem1761	2.53325e-269	2.30867	0.74	0.093	5.70033e-265	tmem176
rcan2	3.70619e-269	1.94516	0.615	0.051	8.33966e-265	rcan2
fstl1b	1.26176e-268	1.71918	0.632	0.053	2.83921e-264	fstl1b
nuak1a	2.51062e-260	1.84591	0.643	0.059	5.64939e-256	nuak1a
cpn11	9.07585e-260	2.35325	0.772	0.114	2.04225e-255	cpn1
sh3tc21	7.811e-259	1.94109	0.763	0.099	1.75763e-254	sh3tc2
igfbp7	6.49628e-258	2.10516	0.632	0.06	1.46179e-253	igfbp7
cxcl12a1	5.49902e-257	3.41918	0.978	0.422	1.23739e-252	cxcl12a
eppk1	9.6829e-257	2.05544	0.6	0.051	2.17885e-252	eppk1
mgat1b1	3.04166e-255	1.94301	0.705	0.085	6.84434e-251	mgat1b
lfng	2.68093e-254	1.83442	0.497	0.027	6.03262e-250	lfng
vwf	4.77483e-251	1.86425	0.514	0.032	1.07443e-246	vwf
si:dkey-163m14.2	1.38082e-245	1.69336	0.561	0.044	3.10712e-241	si:dkey-163m14.2
notchl	1.04676e-243	1.64431	0.544	0.04	2.35543e-239	notchl
flt4	1.05772e-242	1.63157	0.516	0.034	2.38007e-238	flt4
cfd.21	7.37498e-241	2.41262	0.684	0.086	1.65952e-236	cfd.2
si:dkey-28n18.9	1.16265e-237	1.6559	0.544	0.042	2.61619e-233	si:dkey-28n18.9
stab21	3.20658e-235	1.9967	0.639	0.07	7.21544e-231	stab2
tspan5a	1.02935e-231	1.8192	0.619	0.071	2.31625e-227	tspan5a
ramp2	1.63559e-230	1.75223	0.6	0.061	3.68042e-226	ramp2
cd81b	1.33505e-228	1.62933	0.409	0.017	3.00413e-224	cd81b
sox7	3.5577e-227	1.5928	0.516	0.038	8.00553e-223	sox7
adra1d1	3.08114e-226	1.73709	0.609	0.063	6.93318e-222	adra1d
rasip1	4.90995e-226	1.50779	0.495	0.035	1.10484e-221	rasip1
nova2	1.59124e-222	1.70079	0.568	0.054	3.58062e-218	nova2
gpm6ab	2.93515e-222	1.59414	0.469	0.03	6.60468e-218	gpm6ab
dlc2	4.96893e-219	2.06481	0.828	0.183	1.11811e-214	dlc
mrc1b1	5.16996e-219	2.51287	0.895	0.278	1.16334e-214	mrc1b
pcdh12	3.37564e-218	1.53041	0.441	0.026	7.59587e-214	pcdh12
kirrel3l	5.4001e-217	1.64536	0.514	0.043	1.21513e-212	kirrel3l
mgll	1.49429e-216	1.59228	0.503	0.041	3.36246e-212	mgll
slco2b11	6.19289e-214	1.98217	0.768	0.144	1.39352e-209	slco2b1
bmp6	6.79789e-212	1.87247	0.535	0.05	1.52966e-207	bmp6
hspg21	2.48828e-211	1.6476	0.63	0.08	5.59912e-207	hspg2
sema4c	2.86558e-211	1.59867	0.482	0.036	6.44814e-207	sema4c
arl4aa	6.05121e-210	1.64811	0.576	0.063	1.36164e-205	arl4aa
exoc3l2a	3.79222e-209	1.8718	0.424	0.025	8.53326e-205	exoc3l2a
zmp:0000000722	2.98483e-208	1.68535	0.516	0.048	6.71646e-204	zmp:0000000722
LOC101882826	4.0335e-208	1.35506	0.394	0.018	9.07618e-204	LOC101882826
ccdc85b1	2.09839e-202	1.73005	0.665	0.1	4.7218e-198	ccdc85b
limch1b	2.0475e-201	1.63339	0.49	0.043	4.60728e-197	limch1b
anxa13	3.69089e-200	1.3809	0.426	0.028	8.30523e-196	anxa13
mef2cb	1.9165e-198	1.8724	0.637	0.098	4.3125e-194	mef2cb
exoc61	2.86541e-197	1.83581	0.815	0.193	6.44774e-193	exoc6
lima1a	6.88266e-197	1.7138	0.647	0.103	1.54874e-192	lima1a
egfl7	3.30896e-196	1.54948	0.465	0.038	7.44582e-192	egfl7
sox18	1.83727e-195	1.82135	0.456	0.036	4.13422e-191	sox18
sh3pxd2aa1	2.28289e-195	1.65968	0.615	0.083	5.13696e-191	sh3pxd2aa
LOC100149482	5.67221e-191	1.41523	0.48	0.043	1.27636e-186	LOC100149482
tmem88b	2.94704e-190	1.28509	0.346	0.015	6.63144e-186	tmem88b
fbn1	1.03853e-188	1.39047	0.469	0.041	2.33691e-184	fbn1
LOC101883074	1.61454e-188	1.4427	0.406	0.028	3.63305e-184	LOC101883074
col4a2	2.16597e-188	1.54208	0.467	0.043	4.87386e-184	col4a2
meis2a	8.97843e-188	1.36773	0.456	0.038	2.02033e-183	meis2a
fzd4	1.20906e-186	1.5537	0.484	0.047	2.72063e-182	fzd4
ap1b11	1.37191e-186	2.12987	0.822	0.25	3.08708e-182	ap1b1
calcrla	2.00667e-185	1.39488	0.43	0.034	4.51541e-181	calcrla
ednraa	2.55476e-184	1.52909	0.516	0.058	5.74872e-180	ednraa
si:dkey-126g1.9	5.08603e-184	1.49781	0.475	0.048	1.14446e-179	si:dkey-126g1.9
pecam1	4.07948e-183	1.10216	0.314	0.011	9.17965e-179	pecam1
rab11fip3	3.12841e-182	1.54397	0.581	0.082	7.03954e-178	rab11fip3
nfia	8.45864e-182	1.46291	0.486	0.051	1.90336e-177	nfia
arhgef25a	1.99752e-181	1.4592	0.428	0.036	4.49481e-177	arhgef25a
fli1a	1.75185e-180	1.51645	0.566	0.078	3.942e-176	fli1a
shroom4	4.82217e-180	1.29243	0.402	0.029	1.08509e-175	shroom4
dysf	7.0378e-180	1.62721	0.452	0.041	1.58365e-175	dysf
col4a1	8.65858e-179	1.44129	0.366	0.022	1.94835e-174	col4a1
cttnbp2nlb	3.09874e-178	1.31151	0.402	0.03	6.97278e-174	cttnbp2nlb
zgc:195173	6.20221e-178	1.93515	0.561	0.084	1.39562e-173	zgc:195173
gas61	8.00562e-178	1.94561	0.718	0.165	1.80142e-173	gas6
plpp3	1.57906e-177	1.90665	0.523	0.063	3.5532e-173	plpp3
rgs3b	4.86408e-177	1.46068	0.4	0.03	1.09452e-172	rgs3b
she	6.85083e-176	1.22185	0.355	0.02	1.54157e-171	she
scarf1	1.24755e-175	1.26638	0.37	0.024	2.80724e-171	scarf1
ptprb	5.20037e-174	1.22829	0.355	0.021	1.17019e-169	ptprb
etv2	6.06104e-174	1.41828	0.389	0.028	1.36386e-169	etv2
efna1a	1.80618e-165	1.22732	0.398	0.033	4.06428e-161	efna1a
glula1	1.40027e-162	2.20857	0.778	0.229	3.15088e-158	glula
dlc1	7.43708e-162	1.5215	0.48	0.059	1.67349e-157	dlc1
jam2a	2.66148e-161	1.19481	0.366	0.027	5.98886e-157	jam2a
tspan4b.1	2.14021e-160	1.60831	0.568	0.1	4.8159e-156	tspan4b.1
si:ch1073-291c23.2	2.68631e-160	1.43884	0.454	0.052	6.04472e-156	si:ch1073-291c23.2
rab11bb	5.16296e-159	1.42754	0.508	0.074	1.16177e-154	rab11bb
sptbn1	1.54243e-158	1.87847	0.68	0.162	3.47077e-154	sptbn1
nos1apa	4.48358e-158	1.26499	0.394	0.036	1.00889e-153	nos1apa
slc43a1b	1.22507e-156	0.998788	0.372	0.029	2.75666e-152	slc43a1b
tjp1a	1.28555e-155	1.19763	0.409	0.04	2.89275e-151	tjp1a
fam171a2a	1.14897e-154	1.04508	0.316	0.018	2.58542e-150	fam171a2a
bmpr2a	3.25228e-154	1.38456	0.415	0.043	7.31828e-150	bmpr2a
vwa1	7.12929e-154	1.60283	0.342	0.025	1.60423e-149	vwa1
zgc:110182	9.19975e-154	1.14801	0.359	0.028	2.07013e-149	zgc:110182
s1pr5a1	1.37118e-153	1.27739	0.561	0.086	3.08543e-149	s1pr5a
loxl2a	4.73246e-153	1.42736	0.376	0.033	1.0649e-148	loxl2a
rbms3	5.48857e-153	1.29562	0.462	0.056	1.23504e-148	rbms3
arrdc3a1	1.27978e-152	1.8471	0.766	0.219	2.87976e-148	arrdc3a
igf2b1	2.18894e-152	1.7845	0.71	0.191	4.92555e-148	igf2b
prg4b	2.4034e-152	1.2505	0.353	0.027	5.40813e-148	prg4b
bace1	7.24207e-152	0.994065	0.286	0.014	1.62961e-147	bace1
rab11fip1b1	1.31512e-150	1.85307	0.927	0.49	2.95928e-146	rab11fip1b
stx3a	2.87805e-147	1.31161	0.488	0.068	6.47619e-143	stx3a
rassf4	4.65082e-147	1.29594	0.402	0.041	1.04653e-142	rassf4
hoxa1a	8.05853e-147	1.24637	0.353	0.029	1.81333e-142	hoxa1a
marcksl1b1	8.08706e-146	2.21024	0.783	0.263	1.81975e-141	marcksl1b
cyp3c1	1.10984e-145	1.89283	0.742	0.243	2.49736e-141	cyp3c1
cd81a1	4.44462e-145	1.97776	0.854	0.421	1.00013e-140	cd81a
cnn3a	6.68575e-145	1.38029	0.48	0.068	1.50443e-140	cnn3a
pfn2	8.30739e-145	1.83381	0.83	0.33	1.86933e-140	pfn2
pdk4	1.40623e-143	1.36103	0.574	0.108	3.16431e-139	pdk4
lifrb	2.51361e-143	1.51278	0.544	0.102	5.65613e-139	lifrb
pxk1	3.1647e-143	1.78804	0.783	0.269	7.1212e-139	pxk
snx8a	8.57897e-143	1.03635	0.327	0.024	1.93044e-138	snx8a
mmp15a	1.22286e-141	1.06059	0.314	0.022	2.75169e-137	mmp15a
zgc:1584631	4.04795e-141	1.79344	1	1	9.10869e-137	zgc:158463
lmo2	1.06934e-140	1.50053	0.52	0.092	2.40624e-136	lmo2
heg1	1.29251e-140	1.11592	0.275	0.014	2.90841e-136	heg1
nos1apa.1	8.29801e-140	1.21387	0.368	0.035	1.86722e-135	nos1apa.1
tspan18b	1.03542e-139	1.21015	0.4	0.046	2.32989e-135	tspan18b
igflr1	1.11893e-139	1.29588	0.357	0.033	2.51781e-135	igflr1
pros1	1.87158e-139	1.60192	0.574	0.121	4.21144e-135	pros1
sash1a	1.90951e-139	1.3488	0.441	0.059	4.29679e-135	sash1a
ralgapa21	5.91608e-138	1.49516	0.632	0.144	1.33124e-133	ralgapa2
tmem2	8.30222e-138	1.25494	0.454	0.065	1.86817e-133	tmem2
iqsec1b	1.70689e-137	1.25066	0.417	0.051	3.84083e-133	iqsec1b
dll4	3.90684e-137	1.22947	0.34	0.029	8.79118e-133	dll4
adgrl4	6.97685e-136	0.955186	0.252	0.011	1.56993e-131	adgrl4
si:dkey-78a14.5	2.15655e-135	0.993408	0.323	0.026	4.85266e-131	si:dkey-78a14.5
trim3b	2.82664e-135	1.02248	0.353	0.033	6.36051e-131	trim3b
zfp36l1b	1.13377e-134	1.63389	0.733	0.227	2.55122e-130	zfp36l1b
parvab	1.58706e-134	0.832991	0.28	0.016	3.57121e-130	parvab
map1sb	6.62194e-134	0.952287	0.295	0.019	1.49007e-129	map1sb
fmnl3	1.0056e-133	1.51378	0.604	0.141	2.2628e-129	fmnl3
arap3	1.28384e-133	1.1733	0.404	0.05	2.8889e-129	arap3
map4k2	1.4888e-133	1.06009	0.34	0.031	3.3501e-129	map4k2
pear1	1.93895e-133	0.891461	0.303	0.021	4.36302e-129	pear1
kank3	5.18879e-133	1.05132	0.327	0.028	1.16758e-128	kank3
adgrl3.1	9.91239e-133	0.976927	0.318	0.026	2.23049e-128	adgrl3.1
mllt4a	4.1515e-132	1.29477	0.462	0.071	9.3417e-128	mllt4a
si: ch211-223l2.41	4.82842e-132	1.32658	0.778	0.209	1.08649e-127	si: ch211-223l2.4
mtmr81	5.97983e-132	1.30262	0.611	0.138	1.34558e-127	mtmr8
zfp36l2	5.76207e-131	1.25244	0.409	0.053	1.29658e-126	zfp36l2
mafb	2.1045e-130	0.893964	0.262	0.014	4.73555e-126	mafb
adma	7.25619e-129	1.62275	0.544	0.107	1.63279e-124	adma
kdr	2.40322e-128	1.05463	0.282	0.019	5.40773e-124	kdr
ahnak1	4.92888e-128	1.71024	0.837	0.332	1.1091e-123	ahnak
myo1cb1	4.35479e-127	1.71547	0.742	0.264	9.79914e-123	myo1cb
cxcl20	1.19613e-126	1.60972	0.695	0.199	2.69153e-122	cxcl20
bambia	1.64225e-126	1.13509	0.303	0.025	3.69538e-122	bambia
piezo1	2.21377e-126	1.29613	0.462	0.075	4.98143e-122	piezo1
mknk2a	1.13726e-125	1.4225	0.514	0.102	2.55905e-121	mknk2a
si:dkeyp-97a10.1	1.15414e-125	1.09115	0.301	0.025	2.59705e-121	si:dkeyp-97a10.1
LOC101884756	1.59599e-125	1.50638	0.34	0.034	3.59129e-121	LOC101884756
LOC100331538	3.68537e-125	0.90907	0.297	0.023	8.29282e-121	LOC100331538
tgfbr2b	4.57423e-125	0.983392	0.338	0.034	1.02929e-120	tgfbr2b
prex2	9.9922e-124	1.06557	0.284	0.021	2.24844e-119	prex2
stab2.1	6.85449e-123	1.11203	0.277	0.02	1.5424e-118	stab2.1
ppp1r13ba	1.44656e-122	0.993254	0.351	0.04	3.25505e-118	ppp1r13ba
mafba2	3.10803e-122	1.51788	0.923	0.486	6.99368e-118	mafba
zbtb4	5.57876e-122	0.992221	0.344	0.037	1.25533e-117	zbtb4
bcl2b	1.06837e-121	1.03201	0.282	0.021	2.40405e-117	bcl2b
scube3	9.33391e-121	1.09382	0.318	0.03	2.10032e-116	scube3
tie1	2.48881e-120	1.59711	0.443	0.078	5.60032e-116	tie1
prcp1	4.76108e-120	1.44093	0.675	0.211	1.07134e-115	prcp
si:ch211-248e11.2	5.83411e-120	1.30868	0.325	0.033	1.31279e-115	si:ch211-248e11.2
plekhg5a	9.555e-120	0.862456	0.256	0.016	2.15007e-115	plekhg5a
si:ch211-216l23.1	1.63426e-117	1.04501	0.292	0.026	3.67742e-113	si:ch211-216l23.1
fam129ba	2.34236e-117	0.947322	0.258	0.018	5.27079e-113	fam129ba
il11ra	9.05472e-117	0.943484	0.312	0.031	2.03749e-112	il11ra
sorbs2a	9.53476e-117	0.965793	0.323	0.033	2.14551e-112	sorbs2a
osbpl10b	2.04667e-116	0.968434	0.29	0.025	4.60542e-112	osbpl10b
anks1b	2.71753e-116	1.33353	0.503	0.1	6.115e-112	anks1b
tmem108	8.977e-116	1.17127	0.383	0.055	2.02e-111	tmem108
hexb1	9.24556e-115	1.51035	0.877	0.479	2.08044e-110	hexb
flnb	1.22774e-114	0.942098	0.28	0.024	2.76265e-110	flnb
rapgef1b	1.3205e-114	1.02531	0.301	0.029	2.97139e-110	rapgef1b
ckba	6.33189e-114	1.14134	0.409	0.062	1.4248e-109	ckba
ccm2l	9.00998e-114	0.899519	0.271	0.021	2.02743e-109	ccm2l
sos1	2.44682e-113	1.14421	0.32	0.036	5.50584e-109	sos1
sepp1a2	1.55684e-112	1.67965	0.892	0.528	3.50321e-108	sepp1a
uts2r	6.45333e-112	1.09303	0.318	0.035	1.45213e-107	uts2r
prkcg	6.91745e-111	1.13717	0.271	0.022	1.55656e-106	prkcg
wscd2	1.30749e-110	1.47243	0.525	0.127	2.94212e-106	wscd2
vcam1b	3.37999e-110	0.819409	0.26	0.02	7.60566e-106	vcam1b
gb:eh507706	2.61158e-109	0.923807	0.318	0.037	5.87658e-105	gb:eh507706
foxp1b	1.04859e-108	1.3312	0.505	0.112	2.35953e-104	foxp1b
LOC1104384391	1.12667e-108	1.21024	0.991	0.809	2.53523e-104	LOC110438439
reck	6.48998e-108	1.26112	0.411	0.072	1.46038e-103	reck
pmp22b	7.51317e-108	1.16381	0.275	0.025	1.69061e-103	pmp22b
znf516	1.01958e-107	1.03364	0.31	0.034	2.29426e-103	znf516
arhgap31	3.12139e-107	0.981052	0.331	0.041	7.02374e-103	arhgap31
macf1a1	4.42661e-107	1.37599	0.783	0.318	9.96076e-103	macf1a
LOC110438055	9.55188e-107	1.17123	0.297	0.031	2.14936e-102	LOC110438055
LOC100149084	1.65592e-106	1.00013	0.254	0.02	3.72615e-102	LOC100149084
arhgef9b	1.79285e-106	1.00943	0.258	0.021	4.03428e-102	arhgef9b
nr2f1a	4.08228e-106	1.15013	0.256	0.021	9.18595e-102	nr2f1a
sesn3	4.96288e-106	1.13548	0.394	0.067	1.11675e-101	sesn3
mid2	1.65965e-105	0.980351	0.292	0.031	3.73455e-101	mid2
qkia1	5.75277e-104	1.44644	0.757	0.313	1.29449e-99	qkia
plpp2a	1.39627e-103	1.47488	0.497	0.123	3.14188e-99	plpp2a
cdc42ep2	4.80782e-103	0.939325	0.282	0.029	1.08185e-98	cdc42ep2
insra	5.00558e-103	1.22741	0.454	0.095	1.12636e-98	insra
ghrb	2.01145e-102	0.945508	0.301	0.034	4.52616e-98	ghrb
tek	2.48358e-102	0.991308	0.31	0.038	5.58854e-98	tek
tcf4	2.83259e-102	0.817269	0.258	0.022	6.3739e-98	tcf4
rapgef3	7.88329e-102	0.873416	0.256	0.022	1.7739e-97	rapgef3
sept9a	1.17553e-101	0.910154	0.295	0.033	2.64518e-97	sept9a
hipk2	1.27397e-101	1.44392	0.432	0.088	2.86669e-97	hipk2
ehd4	1.67796e-101	1.49104	0.647	0.229	3.77575e-97	ehd4
nfixb	3.98268e-100	0.971716	0.314	0.041	8.96182e-96	nfixb
tie1.1	1.60654e-99	1.53354	0.57	0.172	3.61503e-95	tie1.1
si:ch73-138n13.1	8.76763e-99	1.04732	0.415	0.077	1.97289e-94	si:ch73-138n13.1
tpte1	2.53928e-98	1.28385	0.632	0.21	5.71388e-94	tpte
aplp21	9.39878e-97	1.29956	0.839	0.438	2.11491e-92	aplp2
cldn11a	2.03793e-96	0.866151	0.28	0.03	4.58575e-92	cldn11a
si:ch211-132b12.71	1.93845e-95	1.35592	0.596	0.179	4.3619e-91	si:ch211-132b12.7
csrnp1b1	6.5744e-95	1.46185	0.705	0.29	1.47937e-90	csrnp1b
cebpd1	2.03394e-94	1.44541	0.622	0.199	4.57677e-90	cebpd
creg2	2.37687e-93	1.13431	0.383	0.075	5.34844e-89	creg2
sepp1a.11	9.00824e-93	1.66938	0.843	0.491	2.02703e-88	sepp1a.1
ppp2r5d	1.09177e-92	1.36325	0.51	0.138	2.45671e-88	ppp2r5d
appb	3.44227e-92	1.14089	0.409	0.085	7.74579e-88	appb
erg	8.50557e-91	0.963687	0.331	0.051	1.91392e-86	erg
cep89	1.35529e-90	0.924191	0.29	0.037	3.04968e-86	cep89
lamp2	4.57514e-90	1.42539	0.781	0.429	1.0295e-85	lamp2
myo10l3	4.68807e-90	0.910496	0.316	0.046	1.05491e-85	myo10l3
cxcl8b.1	5.66937e-90	1.94151	0.385	0.073	1.27572e-85	cxcl8b.1
snx2	1.34104e-89	1.26401	0.54	0.163	3.0176e-85	snx2
cdh51	7.06579e-89	1.29418	0.51	0.146	1.58994e-84	cdh5
zcchc24	6.17707e-88	0.779352	0.284	0.037	1.38997e-83	zcchc24
LOC103909284	4.01882e-87	1.09543	0.372	0.071	9.04315e-83	LOC103909284
wsb11	2.42418e-86	1.14378	0.72	0.294	5.45489e-82	wsb1
lgmn1	2.7951e-86	1.17968	0.948	0.711	6.28953e-82	lgmn
si:ch211-204c21.1	3.13464e-86	1.19352	0.406	0.088	7.05357e-82	si:ch211-204c21.1
ccl19a.1	1.2443e-85	1.72558	0.372	0.07	2.79993e-81	ccl19a.1
ctsf	3.9019e-84	1.25039	0.514	0.16	8.78006e-80	ctsf
shroom2a	1.20311e-83	0.805113	0.292	0.042	2.70724e-79	shroom2a
tmem110l	2.71148e-83	1.06245	0.396	0.089	6.10136e-79	tmem110l
hvcn1	3.79825e-82	1.21671	0.473	0.136	8.54681e-78	hvcn1
mgat4a	4.49388e-81	1.1708	0.503	0.152	1.01121e-76	mgat4a
cyth3a	5.31735e-81	1.16385	0.368	0.079	1.19651e-76	cyth3a
itgb1a	7.41005e-81	0.966212	0.28	0.041	1.66741e-76	itgb1a
mgat5	8.51827e-81	1.06059	0.378	0.081	1.91678e-76	mgat5
lepr	9.37801e-80	0.790907	0.258	0.034	2.11024e-75	lepr
plxnd1	6.20838e-79	1.14515	0.587	0.205	1.39701e-74	plxnd1
fkbp1aa	1.71974e-78	1.26348	0.824	0.561	3.86975e-74	fkbp1aa
itga5	2.18616e-78	0.836669	0.308	0.051	4.91931e-74	itga5
smad6b	3.25762e-78	1.02558	0.288	0.045	7.3303e-74	smad6b
cux1a	4.41268e-78	1.03248	0.434	0.113	9.92942e-74	cux1a
tbc1d1	5.3174e-78	0.851205	0.299	0.05	1.19652e-73	tbc1d1
tcf12	8.73771e-78	0.98709	0.398	0.093	1.96616e-73	tcf12
tshz2	3.27961e-76	0.7907	0.252	0.033	7.37979e-72	tshz2
hyal2b	5.52074e-76	0.935774	0.286	0.048	1.24228e-71	hyal2b
tcf7l1b	1.34018e-75	0.897584	0.323	0.061	3.01566e-71	tcf7l1b
tns1b	2.06675e-75	0.847665	0.344	0.067	4.65059e-71	tns1b
spag9b	2.66587e-75	0.787206	0.308	0.055	5.99873e-71	spag9b
mast4	7.61476e-75	1.06736	0.394	0.094	1.71347e-70	mast4
mef2aa	1.09999e-74	1.09077	0.538	0.171	2.47521e-70	mef2aa
socs3a1	1.25283e-74	1.31872	0.867	0.544	2.81911e-70	socs3a
mbnl2	1.83619e-74	1.1253	0.531	0.182	4.13179e-70	mbnl2
tmem176l.1	3.45763e-74	1.28952	0.742	0.426	7.78035e-70	tmem176l.1
tspan14	3.99473e-74	1.11786	0.753	0.389	8.98895e-70	tspan14
ch25h	5.82622e-74	1.18213	0.256	0.037	1.31102e-69	ch25h
klf3	2.17542e-73	0.82475	0.301	0.052	4.89513e-69	klf3
ms4a17a.9	2.56018e-73	0.893089	0.374	0.083	5.76092e-69	ms4a17a.9
ftr82	4.39147e-73	0.858691	0.318	0.062	9.88169e-69	ftr82
abca1a1	9.57591e-73	1.18598	0.798	0.437	2.15477e-68	abca1a
pfn2l	1.08334e-72	1.15964	0.486	0.152	2.43774e-68	pfn2l
cdc42bpb	1.72091e-72	0.997414	0.372	0.088	3.8724e-68	cdc42bpb
si:ch211-1a19.3	2.27358e-71	1.30183	0.604	0.244	5.116e-67	si:ch211-1a19.3
col4a3bpb	3.19991e-71	1.17912	0.525	0.185	7.20044e-67	col4a3bpb
arhgef12b.1	3.30548e-71	0.99939	0.288	0.051	7.43798e-67	arhgef12b.1
pparda	3.34565e-71	0.843713	0.258	0.039	7.52839e-67	pparda
ptpn11b	4.68922e-71	1.07378	0.434	0.124	1.05517e-66	ptpn11b
clic4	5.1658e-71	0.711144	0.262	0.04	1.16241e-66	clic4
lrch1	1.55086e-70	1.1053	0.462	0.142	3.48974e-66	lrch1
foxo1a	1.6136e-70	1.08572	0.503	0.158	3.63092e-66	foxo1a
aatka	2.94668e-70	1.23544	0.443	0.133	6.63063e-66	aatka
c1s	3.04349e-70	0.978805	0.374	0.095	6.84847e-66	c1s
asap1b	4.51304e-70	1.04004	0.376	0.091	1.01552e-65	asap1b
cald1a	3.3339e-69	0.607734	0.286	0.048	7.50195e-65	cald1a
fam43a	7.57325e-69	1.1791	0.434	0.124	1.70413e-64	fam43a
LOC101887081	1.01792e-68	1.11511	0.363	0.089	2.29053e-64	LOC101887081
snx1a1	9.9846e-68	1.16611	0.66	0.328	2.24673e-63	snx1a
slc9a7	1.56667e-67	0.894722	0.312	0.067	3.52533e-63	slc9a7
gcnt4a.1	3.36069e-67	0.826617	0.273	0.048	7.56223e-63	gcnt4a.1
gnsa	3.47738e-67	0.994229	0.331	0.077	7.82481e-63	gnsa
ksr1b	1.86684e-66	0.789437	0.314	0.065	4.20075e-62	ksr1b
tfec	1.46489e-65	1.15007	0.544	0.212	3.29629e-61	tfec
entpd1	2.03557e-65	0.933993	0.363	0.088	4.58043e-61	entpd1
agpat3	2.0439e-65	1.07157	0.486	0.171	4.59919e-61	agpat3
rbpms2a	2.15326e-65	0.697389	0.318	0.065	4.84527e-61	rbpms2a
bahcc1b	3.26515e-65	1.00952	0.396	0.112	7.34724e-61	bahcc1b
ptpn21	8.52288e-65	0.901735	0.329	0.075	1.91782e-60	ptpn21
LOC796180	1.75445e-64	0.960658	0.391	0.106	3.94786e-60	LOC796180
smad7	2.26896e-63	0.793784	0.258	0.045	5.10561e-59	smad7
sphk2	3.31496e-63	0.842465	0.262	0.049	7.45932e-59	sphk2
si:dkey-17m8.1	3.68646e-62	1.079	0.585	0.25	8.29527e-58	si:dkey-17m8.1
rps6ka3b	4.03507e-62	1.06363	0.327	0.079	9.07971e-58	rps6ka3b
arhgap5	8.21701e-62	1.01754	0.445	0.144	1.84899e-57	arhgap5
dnmbp	1.70264e-61	0.872589	0.318	0.071	3.83128e-57	dnmbp
sgk1	2.65171e-61	1.34435	0.505	0.191	5.96688e-57	sgk1
ahr2	3.51395e-61	0.965524	0.617	0.269	7.9071e-57	ahr2
arglu1a1	3.53112e-61	1.06374	0.594	0.253	7.94573e-57	arglu1a
ddx62	6.98569e-61	0.998906	0.652	0.313	1.57192e-56	ddx6
snx9b.11	7.69744e-61	1.15835	0.553	0.237	1.73208e-56	snx9b.1
apc	2.12969e-60	1.21791	0.432	0.144	4.79223e-56	apc
ralba	2.36887e-60	0.969588	0.342	0.087	5.33044e-56	ralba
gng10	1.10618e-59	1.16169	0.422	0.14	2.48912e-55	gng10
ponzr1	2.59456e-59	1.0308	0.849	0.65	5.83828e-55	ponzr1
pank2	3.12782e-59	0.932682	0.465	0.155	7.03823e-55	pank2
myl9b	3.51323e-59	0.558028	0.258	0.047	7.90547e-55	myl9b
LOC1000041992	3.88003e-59	1.3042	0.882	0.641	8.73083e-55	LOC100004199
vdrb	5.19298e-59	1.01403	0.458	0.155	1.16852e-54	vdrb
cast	5.60026e-59	1.02386	0.462	0.161	1.26017e-54	cast
rab13	6.27969e-59	0.695686	0.299	0.066	1.41306e-54	rab13
dock6	1.0977e-58	1.00863	0.406	0.131	2.47005e-54	dock6
tbc1d10aa	1.30874e-58	0.99644	0.437	0.147	2.94493e-54	tbc1d10aa
nrp1a	1.91735e-58	1.17533	0.544	0.222	4.31441e-54	nrp1a
plpp1a	7.93828e-58	1.21666	0.452	0.15	1.78627e-53	plpp1a
sesn12	8.7925e-58	1.23403	0.714	0.397	1.97849e-53	sesn1
itm2ba	1.62138e-57	0.868693	0.867	0.663	3.64843e-53	itm2ba
ms4a17a.11	1.86166e-57	0.794087	0.273	0.058	4.1891e-53	ms4a17a.11
LOC563036	5.02298e-57	0.936261	0.338	0.092	1.13027e-52	LOC563036
rhoca	9.17087e-56	1.09883	0.563	0.256	2.06363e-51	rhoca
igf2b.1	2.98281e-55	1.08258	0.351	0.101	6.71192e-51	igf2b.1
gse1	7.19556e-55	0.80938	0.368	0.103	1.61914e-50	gse1
adipor2	8.32459e-55	1.13148	0.52	0.213	1.8732e-50	adipor2
appa	8.79711e-55	0.923351	0.475	0.174	1.97953e-50	appa
klf2b	1.97424e-54	0.993026	0.303	0.073	4.44244e-50	klf2b
gdpd5b	1.0959e-53	0.897696	0.385	0.12	2.46599e-49	gdpd5b
b2ml2	1.44223e-53	0.716614	0.944	0.893	3.2453e-49	b2ml
si:ch211-165e15.1	1.45203e-53	1.09257	0.462	0.173	3.26736e-49	si:ch211-165e15.1
spry4	1.67097e-53	1.12159	0.275	0.063	3.76001e-49	spry4
npc12	2.72852e-53	0.936002	0.563	0.25	6.13971e-49	npc1
snx5	2.13314e-52	1.10139	0.548	0.261	4.8e-48	snx5
zgc:1714971	9.23795e-52	0.931975	0.658	0.33	2.07872e-47	zgc:171497
si:dkey-201c1.2	1.2501e-51	0.992956	0.508	0.212	2.81297e-47	si:dkey-201c1.2
mmp14b.1	1.2987e-51	0.89433	0.4	0.131	2.92234e-47	mmp14b.1
srrm11	3.53015e-51	0.87475	0.729	0.416	7.94355e-47	srrm1
klf3.11	7.60796e-51	0.519224	0.299	0.071	1.71194e-46	klf3.1
kat6b	1.49041e-50	0.922002	0.389	0.126	3.35373e-46	kat6b
ap2a1	4.06331e-50	1.01233	0.542	0.252	9.14326e-46	ap2a1
si:dkey-7j14.61	6.64155e-50	1.0085	0.682	0.414	1.49448e-45	si:dkey-7j14.6
dedd11	7.56526e-50	1.02684	0.738	0.439	1.70233e-45	dedd1
socs3b	1.33314e-49	1.09936	0.398	0.135	2.99982e-45	socs3b
elk3	1.64931e-49	0.888006	0.366	0.119	3.71127e-45	elk3
ctnnb11	4.20676e-49	0.893161	0.54	0.248	9.46604e-45	ctnnb1
chd3	1.32183e-48	0.922591	0.4	0.136	2.97438e-44	chd3
plxna2	1.65519e-48	0.816662	0.275	0.068	3.7245e-44	plxna2
carhsp1	3.49999e-48	0.835611	0.351	0.109	7.87569e-44	carhsp1
LOC100333474	4.91069e-48	1.01598	0.413	0.145	1.105e-43	LOC100333474
zgc:123068	8.64973e-48	1.39294	0.413	0.151	1.94636e-43	zgc:123068
nckap1	4.11756e-47	0.688758	0.29	0.077	9.26533e-43	nckap1
dclk2a	4.95443e-47	0.741281	0.254	0.059	1.11485e-42	dclk2a
ap2m1a1	4.96381e-47	0.939899	0.669	0.406	1.11696e-42	ap2m1a
mtss1la	7.2434e-47	0.794567	0.31	0.088	1.62991e-42	mtss1la
sptlc2a	7.60288e-47	0.827136	0.361	0.116	1.7108e-42	sptlc2a
jpt1b1	8.08022e-47	0.869252	0.462	0.186	1.81821e-42	jpt1b
sntb2	3.65892e-46	0.955725	0.428	0.169	8.23331e-42	sntb2
zbtb16a	6.64817e-46	1.26887	0.366	0.125	1.49597e-41	zbtb16a
cd82b1	3.66909e-45	0.851401	0.469	0.193	8.25619e-41	cd82b
fkbp51	5.00703e-45	0.872287	0.675	0.374	1.12668e-40	fkbp5
zfhx3	4.36692e-44	0.896454	0.432	0.173	9.82645e-40	zfhx3
krt8.1	4.5911e-44	1.02657	0.357	0.122	1.03309e-39	krt8.1
cry1aa1	5.75559e-44	0.763603	0.389	0.136	1.29512e-39	cry1aa
nhsl1b	5.99103e-44	0.714083	0.28	0.077	1.3481e-39	nhsl1b
shc1	7.62119e-44	0.800589	0.37	0.126	1.71492e-39	shc1
si:ch211-199g17.21	9.14e-44	1.01984	0.568	0.286	2.05668e-39	si:ch211-199g17.2
cbx7a	9.26706e-44	0.832342	0.454	0.178	2.08527e-39	cbx7a
me3	1.44104e-42	0.751892	0.338	0.111	3.24263e-38	me3
mt-rnr21	3.16436e-42	0.299698	0.996	0.993	7.12044e-38	mt-rnr2
bcl2l10	5.32216e-42	0.882361	0.342	0.111	1.19759e-37	bcl2l10
LOC1018844511	1.04862e-41	0.787609	0.477	0.206	2.3596e-37	LOC101884451
xirp2a	5.0695e-41	0.710553	0.265	0.072	1.14074e-36	xirp2a
cldn5b	8.21973e-41	1.10617	0.254	0.066	1.8496e-36	cldn5b
si:dkey-52l18.4	1.09387e-40	0.730898	0.348	0.122	2.46143e-36	si:dkey-52l18.4
itpkcb	4.91604e-40	0.883165	0.312	0.099	1.10621e-35	itpkcb
fermt2	5.45722e-40	0.824654	0.348	0.126	1.22798e-35	fermt2
si:dkeyp-44a8.2	8.62121e-40	0.796852	0.398	0.159	1.93995e-35	si:dkeyp-44a8.2
zmiz2	2.34917e-39	0.79412	0.262	0.074	5.2861e-35	zmiz2
snx9b	2.40679e-39	0.757704	0.363	0.139	5.41575e-35	snx9b
slc25a43	9.68137e-39	0.866155	0.299	0.097	2.1785e-34	slc25a43
rerea	1.9578e-38	0.850106	0.439	0.193	4.40545e-34	rerea
2022-09-22	2.04736e-38	0.827335	0.57	0.303	4.60697e-34	2022-09-02
eif4ebp3l	2.94069e-38	0.649603	0.445	0.184	6.61715e-34	eif4ebp3l
LOC101886393	3.16073e-38	0.817381	0.396	0.163	7.11228e-34	LOC101886393
mlxip	3.40095e-38	0.731612	0.32	0.112	7.65282e-34	mlxip
slc16a101	3.01171e-37	0.848581	0.529	0.265	6.77696e-33	slc16a10
actn41	5.86442e-37	0.774586	0.628	0.372	1.31961e-32	actn4
vps351	1.65089e-36	0.880948	0.458	0.224	3.71484e-32	vps35
tagln2	4.26377e-36	0.909739	0.505	0.243	9.59433e-32	tagln2
tuba8l	5.53958e-36	0.628708	0.535	0.261	1.24652e-31	tuba8l
prkd2	6.5331e-36	0.715192	0.342	0.126	1.47008e-31	prkd2
timp2b	8.63477e-36	0.386295	0.396	0.143	1.94299e-31	timp2b
mob2b	1.67182e-35	0.800058	0.308	0.109	3.76192e-31	mob2b
per1a	1.77977e-35	0.611181	0.26	0.077	4.00484e-31	per1a
pim1	2.27916e-35	1.08434	0.546	0.295	5.12857e-31	pim1
perp	4.35988e-35	0.739598	0.303	0.105	9.81061e-31	perp
rac1a	6.82546e-35	0.730913	0.292	0.102	1.53587e-30	rac1a
si:ch211-212g7.6	2.98526e-34	0.671993	0.277	0.092	6.71744e-30	si:ch211-212g7.6
ctnnd1	6.88604e-34	0.718907	0.318	0.117	1.5495e-29	ctnnd1
tfe3a1	1.31914e-33	0.834096	0.546	0.305	2.96832e-29	tfe3a
sdc31	1.41374e-33	0.707417	0.641	0.35	3.1812e-29	sdc3
kmt2cb	2.02653e-33	0.734458	0.378	0.159	4.56011e-29	kmt2cb
ppt11	2.19771e-33	0.822336	0.654	0.407	4.9453e-29	ppt1
yrk1	3.36943e-33	0.764949	0.516	0.275	7.5819e-29	yrk
kif13ba	6.49971e-33	0.827705	0.366	0.157	1.46257e-28	kif13ba
si:ch211-160o17.4	2.1984e-32	0.790043	0.422	0.2	4.94685e-28	si:ch211-160o17.4
scarb2a	1.21653e-31	0.916871	0.286	0.105	2.73744e-27	scarb2a
zfyve21	3.33679e-31	0.70013	0.314	0.124	7.50844e-27	zfyve21
u2surp1	1.11596e-30	0.649627	0.574	0.331	2.51114e-26	u2surp
si:zfos-2326c3.22	1.97127e-30	0.718754	0.458	0.227	4.43576e-26	si:zfos-2326c3.2
jmjd1cb	3.5176e-30	0.705837	0.348	0.146	7.91529e-26	jmjd1cb
hif1ab	5.13421e-30	0.749091	0.609	0.388	1.1553e-25	hif1ab
ulk2	7.45958e-30	0.791659	0.366	0.161	1.67856e-25	ulk2
si:dkey-56i24.1	1.00838e-29	0.591291	0.305	0.112	2.26906e-25	si:dkey-56i24.1
khdrbs1a	2.1207e-29	0.610383	0.811	0.605	4.77199e-25	khdrbs1a
zgc:92818	2.79959e-29	0.662004	0.312	0.124	6.29964e-25	zgc:92818
c2cd2	3.6162e-29	0.651394	0.292	0.112	8.13717e-25	c2cd2
tob1b1	4.21609e-29	0.710309	0.458	0.234	9.48705e-25	tob1b
klc1a	5.47228e-29	0.656319	0.441	0.219	1.23137e-24	klc1a
npl1	1.28113e-28	0.749919	0.385	0.181	2.88279e-24	npl
nenf	3.59009e-28	0.657362	0.329	0.141	8.07842e-24	nenf
zgc:640721	4.45927e-28	0.620956	0.703	0.446	1.00342e-23	zgc:64072
cd302	4.80987e-28	0.639954	0.344	0.15	1.08232e-23	cd302
id12	9.0906e-28	0.881361	0.772	0.512	2.04557e-23	id1
si:ch211-74m13.31	1.95317e-27	0.619732	0.641	0.37	4.39502e-23	si:ch211-74m13.3
evi5b	1.96973e-27	0.585272	0.258	0.095	4.43228e-23	evi5b
ddx3a1	2.32112e-27	0.762643	0.462	0.251	5.22299e-23	ddx3a
wu:fb16f031	4.62112e-27	0.738569	0.48	0.267	1.03984e-22	wu:fb16f03
clk4a	5.95601e-27	0.591577	0.439	0.216	1.34022e-22	clk4a
snx12	6.37826e-27	0.807918	0.411	0.217	1.43524e-22	snx12
magi1b	1.39413e-26	0.783879	0.256	0.096	3.13707e-22	magi1b
elmo11	1.6809e-26	0.651611	0.411	0.206	3.78236e-22	elmo1
rsrp1	3.31964e-26	0.644395	0.495	0.271	7.46986e-22	rsrp1
si:ch211-281l24.3	4.72794e-26	0.781665	0.505	0.291	1.06388e-21	si:ch211-281l24.3
hnrnpa0a	4.90816e-26	0.625497	0.275	0.107	1.10443e-21	hnrnpa0a
acvrl11	6.82428e-26	0.670394	0.49	0.271	1.5356e-21	acvrl1
atp2b1a	9.77322e-26	0.688363	0.428	0.22	2.19917e-21	atp2b1a
gstr	1.37993e-25	0.584686	0.415	0.211	3.10512e-21	gstr
rab5c1	2.01626e-25	0.715464	0.57	0.375	4.53698e-21	rab5c
bhlhe401	2.27296e-25	0.407554	0.525	0.267	5.11462e-21	bhlhe40
rin2	2.72478e-25	0.679948	0.299	0.129	6.1313e-21	rin2
aco1	2.92068e-25	0.692337	0.417	0.218	6.5721e-21	aco1
aoc2.1	5.09596e-25	0.908889	0.28	0.113	1.14669e-20	aoc2.1
sf3b1	5.1483e-25	0.588058	0.529	0.312	1.15847e-20	sf3b1
slc43a2a1	1.37706e-24	0.766296	0.598	0.363	3.09866e-20	slc43a2a
usp91	1.69379e-23	0.622013	0.475	0.276	3.81136e-19	usp9
csnk1db	1.79846e-23	0.757142	0.402	0.216	4.0469e-19	csnk1db
max1	3.32289e-23	0.679485	0.514	0.321	7.47718e-19	max
ogt.1	4.91705e-23	0.574806	0.46	0.258	1.10643e-18	ogt.1
iqsec2b1	7.30077e-23	0.664241	0.434	0.236	1.64282e-18	iqsec2b
gatad2b	9.7197e-23	0.673767	0.383	0.198	2.18713e-18	gatad2b
susd61	1.61719e-22	0.642108	0.415	0.226	3.63901e-18	susd6
fam120c1	1.72016e-22	0.594799	0.477	0.289	3.87071e-18	fam120c
pfkfb4b	2.40412e-22	0.407073	0.578	0.364	5.40975e-18	pfkfb4b
per1b	4.03382e-22	0.495565	0.34	0.16	9.0769e-18	per1b
arhgef1a	4.33397e-22	0.589344	0.314	0.144	9.75229e-18	arhgef1a
slc12a7b1	4.39349e-22	0.635241	0.381	0.198	9.88622e-18	slc12a7b
arpc1a	5.17647e-22	0.538834	0.411	0.224	1.16481e-17	arpc1a
si:ch73-63e15.2	8.32627e-22	0.609945	0.355	0.177	1.87358e-17	si:ch73-63e15.2
fryl	8.94364e-22	0.515367	0.366	0.184	2.0125e-17	fryl
chd21	1.29788e-21	0.520941	0.748	0.564	2.92048e-17	chd2
rbm39a	3.99042e-21	0.614294	0.477	0.284	8.97924e-17	rbm39a
rab1ba	4.90236e-21	0.646026	0.385	0.211	1.10313e-16	rab1ba
gmfb	5.33005e-21	0.628399	0.28	0.128	1.19937e-16	gmfb
cox8b	6.73972e-21	0.405779	0.581	0.371	1.51657e-16	cox8b
pip4k2ca	8.72465e-21	0.616642	0.342	0.177	1.96322e-16	pip4k2ca
fubp11	9.1078e-21	0.675691	0.391	0.216	2.04944e-16	fubp1
zgc:110340.22	1.4295e-20	1.06941	0.486	0.287	3.21666e-16	zgc:110340.2
baz2ba1	2.03425e-20	0.619456	0.432	0.247	4.57747e-16	baz2ba
zgc:154055	4.06483e-20	0.546211	0.282	0.125	9.14668e-16	zgc:154055
rbbp6	4.64687e-20	0.527559	0.452	0.265	1.04564e-15	rbbp6
LOC100535428	1.20051e-19	0.544723	0.376	0.2	2.70139e-15	LOC100535428
ywhabl1	1.33101e-19	0.582525	0.619	0.449	2.99504e-15	ywhabl
zfand5a	1.3984e-19	0.542779	0.286	0.133	3.14667e-15	zfand5a
cd99	1.61126e-19	0.467466	0.273	0.118	3.62566e-15	cd99
si:dkey-156n14.5.1	2.46207e-19	0.556815	0.378	0.207	5.54014e-15	si:dkey-156n14.5.1
camk2g1	3.00644e-19	0.586264	0.333	0.17	6.76509e-15	camk2g1
tmem134	3.83636e-19	0.495031	0.262	0.12	8.63257e-15	tmem134
rarga	4.10541e-19	0.431148	0.267	0.12	9.238e-15	rarga
spna2	4.42035e-19	0.562402	0.277	0.129	9.94667e-15	spna2
kansl1a	4.9384e-19	0.494581	0.254	0.112	1.11124e-14	kansl1a
ubap2a	5.71567e-19	0.543529	0.262	0.12	1.28614e-14	ubap2a
lgals9l31	6.48723e-19	0.569078	0.529	0.348	1.45976e-14	lgals9l3
ogdha1	7.36762e-19	0.535938	0.398	0.222	1.65786e-14	ogdha
LOC1018862601	7.90722e-19	0.617325	0.398	0.228	1.77928e-14	LOC101886260
nr1d2b	1.23161e-18	0.428011	0.28	0.129	2.77136e-14	nr1d2b
sft2d1	1.40044e-18	0.443154	0.308	0.154	3.15126e-14	sft2d1
ogt.2	2.99323e-18	0.50715	0.301	0.147	6.73536e-14	ogt.2
nr1d2a1	4.41134e-18	0.579106	0.482	0.299	9.9264e-14	nr1d2a
adam10a1	4.65645e-18	0.588026	0.574	0.392	1.04779e-13	adam10a
dusp11	6.00669e-18	0.421058	0.501	0.306	1.35162e-13	dusp1
lpin1	6.75282e-18	0.971443	0.331	0.179	1.51952e-13	lpin1
agfg1a	7.16298e-18	0.561873	0.262	0.123	1.61181e-13	agfg1a
dido11	7.51589e-18	0.643761	0.426	0.259	1.69122e-13	dido1
wls1	1.44013e-17	0.561493	0.297	0.152	3.24059e-13	wls
gnas	1.48743e-17	0.58496	0.329	0.175	3.34702e-13	gnas
cst14b.1	1.68654e-17	0.385533	0.533	0.335	3.79505e-13	cst14b.1
srsf1b	1.79544e-17	0.552536	0.305	0.154	4.04011e-13	srsf1b
sfpq	1.84518e-17	0.633247	0.314	0.166	4.15203e-13	sfpq
akr1a1b.1	2.15387e-17	0.533877	0.273	0.132	4.84664e-13	akr1a1b.1
si:dkey-156n14.5	2.39918e-17	0.62839	0.28	0.137	5.39864e-13	si:dkey-156n14.5
rsu1	2.91666e-17	0.558605	0.269	0.13	6.56306e-13	rsu1
ciarta1	3.28781e-17	0.567893	0.376	0.211	7.39823e-13	ciarta
tnrc18	3.42103e-17	0.557869	0.353	0.197	7.69801e-13	tnrc18
gigyf1	4.17023e-17	0.462517	0.338	0.181	9.38384e-13	gigyf1
zc3h11a	6.36048e-17	0.456738	0.527	0.346	1.43123e-12	zc3h11a
tpd52l2b	9.12492e-17	0.492303	0.346	0.19	2.05329e-12	tpd52l2b
si:dkey-211g8.8	1.03612e-16	0.802039	0.305	0.159	2.33147e-12	si:dkey-211g8.8
si:ch211-166g5.4	1.09827e-16	0.563079	0.28	0.139	2.47133e-12	si:ch211-166g5.4
mob4	1.13235e-16	0.447023	0.357	0.204	2.54802e-12	mob4
si:ch211-181d7.3	1.31045e-16	0.590767	0.282	0.14	2.94877e-12	si:ch211-181d7.3
ddx5	1.32524e-16	0.497091	0.671	0.497	2.98206e-12	ddx5
ostm12	1.41086e-16	0.431669	0.378	0.222	3.17472e-12	ostm1
rab20	1.54028e-16	0.514777	0.342	0.188	3.46593e-12	rab20
ubap2l	1.72718e-16	0.454772	0.372	0.212	3.88649e-12	ubap2l
iscub.1	1.7334e-16	0.488693	0.327	0.178	3.9005e-12	iscub.1
arhgef12b	1.83624e-16	0.577292	0.31	0.166	4.13192e-12	arhgef12b
chac1	2.5645e-16	0.395528	0.381	0.216	5.77063e-12	chac1
ppp1r21	2.92158e-16	0.460963	0.348	0.195	6.57414e-12	ppp1r21
fam208b1	3.81321e-16	0.489347	0.398	0.236	8.58049e-12	fam208b
cox4i21	3.87185e-16	0.432914	0.387	0.219	8.71244e-12	cox4i2
elavl1	4.16645e-16	0.568013	0.29	0.151	9.37535e-12	elavl1
kras	4.76073e-16	0.608886	0.26	0.129	1.07126e-11	kras
midn1	4.89235e-16	0.574559	0.409	0.248	1.10088e-11	midn
cyth1a2	4.94722e-16	0.49999	0.52	0.357	1.11322e-11	cyth1a
lonrf1l	1.09789e-15	0.472756	0.297	0.153	2.47046e-11	lonrf1l
nktr	1.38014e-15	0.393323	0.271	0.134	3.1056e-11	nktr
serinc21	1.63084e-15	0.491996	0.535	0.38	3.66971e-11	serinc2
shoc2	1.69371e-15	0.525713	0.331	0.188	3.81119e-11	shoc2
canx1	1.88819e-15	0.447489	0.428	0.267	4.24881e-11	canx
snx171	1.91724e-15	0.587565	0.411	0.256	4.31416e-11	snx17
mych	1.96808e-15	0.550917	0.267	0.134	4.42858e-11	mych
prkar1aa	2.19667e-15	0.469212	0.391	0.239	4.94295e-11	prkar1aa
cd9a1	2.49149e-15	0.541432	0.385	0.239	5.60636e-11	cd9a
cpeb4b	3.77564e-15	0.652948	0.348	0.205	8.49594e-11	cpeb4b
abca3b	4.78132e-15	0.447273	0.297	0.158	1.07589e-10	abca3b
tnrc6c11	8.71454e-15	0.45899	0.531	0.372	1.96095e-10	tnrc6c1
pora	8.92563e-15	0.529694	0.256	0.131	2.00845e-10	pora
zgc:1009181	9.13387e-15	0.57589	0.391	0.249	2.0553e-10	zgc:100918
tob1a	1.3095e-14	0.455728	0.452	0.291	2.94664e-10	tob1a
pafah1b1a1	1.34604e-14	0.432051	0.415	0.262	3.02886e-10	pafah1b1a
si:ch211-214b16.3	1.43345e-14	0.578863	0.252	0.127	3.22554e-10	si:ch211-214b16.3
gadd45ba	1.74208e-14	0.579136	0.54	0.366	3.92002e-10	gadd45ba
vat11	2.24904e-14	0.487749	0.26	0.136	5.0608e-10	vat1
arhgap29b	2.55793e-14	0.559207	0.26	0.136	5.75586e-10	arhgap29b
stxbp3	2.95816e-14	0.580829	0.312	0.179	6.65646e-10	stxbp3
fcho2	4.24498e-14	0.511742	0.284	0.155	9.55205e-10	fcho2
gnb1b	5.38574e-14	0.430419	0.617	0.471	1.2119e-09	gnb1b
hdlbpa	5.9421e-14	0.353308	0.505	0.348	1.33709e-09	hdlbpa
LOC100331639	5.95016e-14	0.486059	0.415	0.268	1.3389e-09	LOC100331639
qki21	7.39984e-14	0.579677	0.348	0.209	1.66511e-09	qki2
dyrk1b	8.48207e-14	0.458692	0.275	0.144	1.90864e-09	dyrk1b
eml4	1.05324e-13	0.463958	0.256	0.134	2.37001e-09	eml4
bnip2	1.18116e-13	0.476088	0.265	0.142	2.65785e-09	bnip2
ptbp1a1	1.34375e-13	0.558536	0.422	0.279	3.02371e-09	ptbp1a
etnk1	1.60814e-13	0.341216	0.559	0.388	3.61865e-09	etnk1
2022-09-12	1.61126e-13	0.400207	0.413	0.266	3.62565e-09	2022-09-12
prr13	1.77247e-13	0.405348	0.262	0.139	3.98842e-09	prr13
ndfip1l1	4.23328e-13	0.491786	0.505	0.342	9.52572e-09	ndfip1l
ash1l	5.42193e-13	0.443275	0.344	0.209	1.22004e-08	ash1l
tmem50a	6.71276e-13	0.438634	0.4	0.264	1.51051e-08	tmem50a
dennd2c	7.10803e-13	0.438359	0.262	0.141	1.59945e-08	dennd2c
pttg1ipb	7.82802e-13	0.327095	0.301	0.168	1.76146e-08	pttg1ipb
ivns1abpb	1.02731e-12	0.357071	0.335	0.199	2.31164e-08	ivns1abpb
sptlc2b	1.17861e-12	0.442048	0.265	0.146	2.65211e-08	sptlc2b
snrnp701	1.234e-12	0.482412	0.37	0.235	2.77675e-08	snrnp70
abcc52	1.30033e-12	0.33506	0.497	0.338	2.92599e-08	abcc5
leng8	1.83801e-12	0.451639	0.31	0.18	4.13589e-08	leng8
nfe2l2a1	1.90153e-12	0.38081	0.628	0.454	4.27882e-08	nfe2l2a
si:dkey-177p2.6	1.952e-12	0.431221	0.34	0.207	4.3924e-08	si:dkey-177p2.6
rab101	2.16927e-12	0.462982	0.402	0.27	4.88129e-08	rab10
zgc:175264	2.63259e-12	0.334809	0.295	0.164	5.92385e-08	zgc:175264
nap1l1	2.6474e-12	0.39192	0.422	0.274	5.95717e-08	nap1l1
serinc1	2.9285e-12	0.471888	0.361	0.232	6.5897e-08	serinc1
sdcbp2.2	3.27216e-12	0.422617	0.301	0.172	7.36302e-08	sdcbp2.2
kmt2a1	3.41095e-12	0.336485	0.34	0.205	7.67532e-08	kmt2a
nufip2	3.85177e-12	0.458261	0.252	0.138	8.66726e-08	nufip2
ist1	4.21117e-12	0.552893	0.273	0.158	9.47597e-08	ist1
sltm1	4.70634e-12	0.516757	0.361	0.229	1.05902e-07	sltm
ylpm1	6.41659e-12	0.447931	0.288	0.166	1.44386e-07	ylpm1
srsf11	6.47273e-12	0.477021	0.376	0.243	1.45649e-07	srsf11
srsf3a	6.92624e-12	0.369387	0.265	0.144	1.55854e-07	srsf3a
tefa1	6.95899e-12	0.334804	0.394	0.245	1.56591e-07	tefa
vps4b	7.15182e-12	0.409379	0.471	0.34	1.6093e-07	vps4b
eif4a1a1	8.04614e-12	0.408081	0.477	0.334	1.81054e-07	eif4a1a
kdelr2a	8.31288e-12	0.379523	0.31	0.187	1.87056e-07	kdelr2a
map3k7	9.69581e-12	0.467476	0.267	0.153	2.18175e-07	map3k7
arrdc3b1	1.15375e-11	0.320913	0.37	0.227	2.59617e-07	arrdc3b
ywhaqb	1.17282e-11	0.495956	0.477	0.345	2.63908e-07	ywhaqb
ankrd112	1.34515e-11	0.427333	0.525	0.384	3.02685e-07	ankrd11
si:ch211-108d22.2	1.45158e-11	0.566464	0.31	0.188	3.26635e-07	si:ch211-108d22.2
znf865	1.49307e-11	0.393855	0.303	0.183	3.35972e-07	znf865
gpatch8	1.52872e-11	0.35915	0.406	0.265	3.43993e-07	gpatch8
jun	1.60437e-11	0.307102	0.32	0.181	3.61015e-07	jun
ap2s1	1.72755e-11	0.497999	0.357	0.24	3.88732e-07	ap2s1
usp8	2.69734e-11	0.509267	0.269	0.159	6.06955e-07	usp8
slka	3.16212e-11	0.464122	0.323	0.2	7.11539e-07	slka
wu:fb69f10	3.38067e-11	0.41161	0.265	0.15	7.60718e-07	wu:fb69f10
hgs	4.133e-11	0.431091	0.316	0.197	9.30008e-07	hgs
hnrnpm	4.54864e-11	0.422771	0.299	0.179	1.02354e-06	hnrnpm
serbp1b	9.98e-11	0.38564	0.456	0.328	2.2457e-06	serbp1b
dtnbp1a	1.16131e-10	0.36149	0.34	0.219	2.61317e-06	dtnbp1a
znf318	1.35356e-10	0.455031	0.28	0.167	3.04577e-06	znf318
si:rp71-36a1.3	1.41592e-10	0.431994	0.415	0.291	3.18611e-06	si:rp71-36a1.3
pafah1b1b	1.43792e-10	0.421014	0.267	0.158	3.23561e-06	pafah1b1b
ppme1	1.74182e-10	0.341039	0.26	0.153	3.91943e-06	ppme1
stat3	1.88434e-10	0.374899	0.338	0.216	4.24014e-06	stat3
csde11	1.93351e-10	0.335484	0.602	0.475	4.35077e-06	csde1
syncrip1	2.03872e-10	0.341673	0.581	0.45	4.58752e-06	syncrip
ddit3	2.2077e-10	0.429364	0.417	0.281	4.96776e-06	ddit3
si:zfos-464b6.2	2.60121e-10	0.323018	0.447	0.316	5.85324e-06	si:zfos-464b6.2
tial1	2.79859e-10	0.279559	0.282	0.166	6.29738e-06	tial1
rbm5	3.05861e-10	0.424369	0.318	0.2	6.88248e-06	rbm5
znf1035	3.54922e-10	0.364679	0.308	0.192	7.98645e-06	znf1035
srsf2a1	4.11342e-10	0.438051	0.437	0.316	9.25603e-06	srsf2a
kmt2d	4.29001e-10	0.391625	0.273	0.163	9.65337e-06	kmt2d
nop58	4.83985e-10	0.341613	0.258	0.149	1.08906e-05	nop58
syne1b1	5.02812e-10	0.325178	0.273	0.158	1.13143e-05	syne1b
hdac9b	5.35851e-10	0.433563	0.277	0.169	1.20577e-05	hdac9b
kdm4b	7.31657e-10	0.409047	0.26	0.157	1.64637e-05	kdm4b
dnajc7	8.16808e-10	0.351229	0.26	0.157	1.83798e-05	dnajc7
prrc2a	8.75729e-10	0.423877	0.262	0.158	1.97057e-05	prrc2a
lrp10	1.46662e-09	0.408419	0.32	0.211	3.30018e-05	lrp10
slc25a33	1.75813e-09	0.314955	0.282	0.175	3.95613e-05	slc25a33
mhc1uba	1.90217e-09	0.58403	0.417	0.299	4.28026e-05	mhc1uba
rbm4.21	2.92515e-09	0.476721	0.383	0.273	6.58217e-05	rbm4.2
LOC1018851641	3.53731e-09	0.319038	0.437	0.313	7.95967e-05	LOC101885164
dap1b1	3.66996e-09	0.379742	0.366	0.253	8.25815e-05	dap1b
trnau1apb1	4.16228e-09	0.358926	0.368	0.253	9.36596e-05	trnau1apb
ap1m1	4.35951e-09	0.446176	0.284	0.186	9.80976e-05	ap1m1
si:ch211-214j24.10	4.89248e-09	0.328547	0.383	0.267	0.000110091	si:ch211-214j24.10
ppp2r1ba	5.35497e-09	0.383455	0.297	0.195	0.000120498	ppp2r1ba
polr2a	5.38394e-09	0.451013	0.301	0.198	0.000121149	polr2a
ppargc1b	6.20695e-09	0.511544	0.299	0.195	0.000139669	ppargc1b
sf11	7.70455e-09	0.412761	0.327	0.225	0.000173368	sf1
klf13	9.93003e-09	0.499364	0.267	0.17	0.000223446	klf13
cdc42	9.9418e-09	0.355518	0.52	0.409	0.00022371	cdc42
arf2a	1.05977e-08	0.388003	0.389	0.284	0.000238469	arf2a
irf2bp2a1	1.20631e-08	0.388836	0.492	0.372	0.000271443	irf2bp2a
LOC5626482	1.23383e-08	0.302373	0.404	0.284	0.000277636	LOC562648
bri3	1.56105e-08	0.332269	0.48	0.36	0.000351267	bri3
rabgap1l	1.62549e-08	0.332066	0.273	0.173	0.000365768	rabgap1l
gba1	1.62799e-08	0.365265	0.252	0.158	0.00036633	gba
dusp6.11	1.83046e-08	0.348134	0.404	0.283	0.00041189	dusp6.1
aip	1.86245e-08	0.321811	0.258	0.162	0.000419089	aip
papola	1.90922e-08	0.347092	0.282	0.184	0.000429613	papola
srsf5a	2.12186e-08	0.258888	0.602	0.474	0.000477461	srsf5a
nucb11	2.13762e-08	0.391255	0.303	0.205	0.000481008	nucb1
add3a	2.14938e-08	0.344822	0.394	0.28	0.000483654	add3a
golgb1	2.59368e-08	0.337668	0.327	0.22	0.000583631	golgb1
anp32a	2.66602e-08	0.30239	0.484	0.357	0.000599907	anp32a
abca1b1	3.5826e-08	0.252628	0.265	0.167	0.000806157	abca1b
fli1b1	3.68329e-08	0.339822	0.351	0.242	0.000828815	fli1b
abi2b2	4.06521e-08	0.259341	0.394	0.277	0.000914754	abi2b
crebzf1	4.38993e-08	0.439317	0.391	0.287	0.000987822	crebzf
krt81	4.63198e-08	0.251227	0.697	0.519	0.00104229	krt8
acin1a.1	5.91513e-08	0.365089	0.32	0.215	0.00133102	acin1a.1
furina	6.15762e-08	0.257997	0.256	0.159	0.00138559	furina
gspt1l	7.25745e-08	0.409697	0.29	0.198	0.00163307	gspt1l
ddx211	7.53842e-08	0.363834	0.417	0.311	0.00169629	ddx21
pgrmc1	8.40761e-08	0.271113	0.265	0.171	0.00189188	pgrmc1
rnf19a	8.81965e-08	0.373562	0.254	0.163	0.0019846	rnf19a
cpvl1	8.82168e-08	0.334973	0.413	0.298	0.00198505	cpvl
LOC1039104381	1.0276e-07	0.441579	0.312	0.213	0.00231231	LOC103910438
ip6k2b1	1.031e-07	0.36767	0.366	0.269	0.00231996	ip6k2b
hipk3a	1.06862e-07	0.410023	0.26	0.171	0.00240462	hipk3a
ddx3b	1.21187e-07	0.358076	0.256	0.164	0.00272696	ddx3b
kat6a	1.43194e-07	0.358801	0.256	0.163	0.00322214	kat6a
rab2a	1.638e-07	0.317198	0.409	0.317	0.00368583	rab2a
cica	3.09928e-07	0.298845	0.297	0.204	0.006974	cica
rab5ab	3.75668e-07	0.336412	0.288	0.199	0.00845328	rab5ab
waca	3.75827e-07	0.333185	0.288	0.197	0.00845686	waca
rab1ab	4.6834e-07	0.338327	0.492	0.39	0.0105386	rab1ab
hif1al	5.94367e-07	0.254155	0.417	0.315	0.0133745	hif1al
ap1g1	5.99101e-07	0.344663	0.256	0.173	0.013481	ap1g1
eif4ebp21	7.12631e-07	0.291497	0.402	0.303	0.0160356	eif4ebp2
scaf1	7.86385e-07	0.411429	0.265	0.179	0.0176952	scaf1
ankrd122	9.35962e-07	0.294319	0.353	0.257	0.021061	ankrd12
gdi2	1.03153e-06	0.261614	0.284	0.195	0.0232114	gdi2
rab14	1.16781e-06	0.368237	0.374	0.286	0.026278	rab14
calm2a	1.27201e-06	0.276479	0.318	0.23	0.0286228	calm2a
eif3s10	1.36625e-06	0.251177	0.458	0.353	0.0307433	eif3s10
glyr1	1.58934e-06	0.310968	0.252	0.168	0.0357634	glyr1
h2afy2	2.08522e-06	0.301767	0.305	0.222	0.0469216	h2afy2
grinab1	2.28905e-06	0.325243	0.292	0.207	0.0515082	grinab
stx12	2.56154e-06	0.264353	0.271	0.19	0.0576397	stx12
rbck1	2.9471e-06	0.386452	0.265	0.187	0.0663156	rbck1
kif5ba	2.96514e-06	0.315727	0.265	0.184	0.0667216	kif5ba
akap8l	3.28909e-06	0.31435	0.292	0.21	0.0740111	akap8l
bzw1b	3.3768e-06	0.283147	0.363	0.276	0.0759848	bzw1b
usp7	3.82516e-06	0.284048	0.284	0.204	0.0860737	usp7
txn2	5.54021e-06	0.276014	0.256	0.18	0.124666	txn2
cdv3	5.55872e-06	0.309507	0.348	0.262	0.125082	cdv3
nop56	6.34759e-06	0.263702	0.43	0.338	0.142833	nop56
kmt2bb	8.34673e-06	0.254533	0.387	0.302	0.187818	kmt2bb
arglu1b	1.11368e-05	0.276139	0.299	0.215	0.2506	arglu1b
tcf7l1a1	1.83517e-05	0.29458	0.269	0.194	0.412949	tcf7l1a
zranb2	1.86133e-05	0.466241	0.267	0.194	0.418835	zranb2
si:dkeyp-118h9.71	1.91665e-05	0.437707	0.411	0.316	0.431284	si:dkeyp-118h9.7
purab	3.08081e-05	0.316266	0.258	0.186	0.693244	purab
zgc:158564	3.39842e-05	0.326315	0.335	0.261	0.764713	zgc:158564
rab5aa1	5.03195e-05	0.269656	0.402	0.328	1	rab5aa
ube2e3	0.00015937	0.257634	0.443	0.367	1	ube2e3
acin1b1	0.000257162	0.254811	0.338	0.269	1	acin1b
lipin21	0.000276137	0.294155	0.342	0.274	1	lipin2
nop2	0.000296498	0.336211	0.26	0.199	1	nop2
si:dkey-253d23.31	0.000328106	0.283089	0.267	0.203	1	si:dkey-253d23.3
u2af2b	0.000458595	0.263182	0.335	0.275	1	u2af2b
klf6a1	0.00132999	0.297081	0.46	0.408	1	klf6a
usp10	0.00221987	0.26482	0.265	0.215	1	usp10

## Sheet:  neutrophils
	p_val	avg_log2FC	pct.1	pct.2	p_val_adj	gene
lyz.2	0	5.62546	0.921	0.178	0	lyz.2
npsn	0	5.15361	0.962	0.093	0	npsn
LOC103908620	0	4.49893	0.946	0.141	0	LOC103908620
mpx	0	4.40454	0.9	0.023	0	mpx
cpa5	0	4.03961	0.783	0.042	0	cpa5
si:ch1073-429i10.1	0	3.73168	0.758	0.038	0	si:ch1073-429i10.1
alox5ap.1	0	3.72827	0.828	0.081	0	alox5ap.1
cfl1l	0	3.06989	0.731	0.053	0	cfl1l
illr4	0	2.90146	0.676	0.015	0	illr4
sult2st1	0	2.8531	0.742	0.066	0	sult2st1
ch25hl2	0	2.67031	0.62	0.011	0	ch25hl2
sms	0	2.6148	0.638	0.042	0	sms
si:ch73-41h24.1	0	2.55302	0.656	0.026	0	si:ch73-41h24.1
hyal3	0	1.96363	0.505	0.016	0	hyal3
ctss1	0	1.9278	0.493	0.01	0	ctss1
si:ch211-286b5.8	0	1.84137	0.489	0.006	0	si:ch211-286b5.8
LOC100006250	9.10844e-298	1.5362	0.419	0.005	2.04958e-293	LOC100006250
lect2l	1.54633e-296	5.68901	1	0.389	3.47956e-292	lect2l
triobpa	7.02197e-292	1.83079	0.514	0.021	1.58008e-287	triobpa
LOC103910140	7.33768e-292	4.15733	0.966	0.269	1.65112e-287	LOC103910140
cnksr2b	4.06063e-289	1.69198	0.414	0.006	9.13723e-285	cnksr2b
si:ch73-343l4.8	1.61663e-283	1.88093	0.48	0.016	3.63774e-279	si:ch73-343l4.8
scpp8	4.75137e-278	1.70852	0.389	0.004	1.06915e-273	scpp8
si:ch211-284o19.8.1	5.26433e-269	2.23421	0.577	0.044	1.18458e-264	si:ch211-284o19.8.1
ldlrap1a	1.03715e-254	1.57383	0.441	0.017	2.3338e-250	ldlrap1a
si:dkey-27h10.2	1.84023e-242	1.50395	0.376	0.008	4.1409e-238	si:dkey-27h10.2
hbegfa	1.46126e-240	2.19186	0.575	0.055	3.28813e-236	hbegfa
ppdpfa	1.0067e-239	1.95185	0.545	0.044	2.26527e-235	ppdpfa
prkcda	1.03018e-234	1.72823	0.511	0.037	2.31812e-230	prkcda
cyp7a1b	4.90573e-234	1.21178	0.326	0.003	1.10389e-229	cyp7a1b
adam19b	2.94695e-232	1.53334	0.403	0.015	6.63122e-228	adam19b
cebpa	1.45648e-230	2.67243	0.837	0.194	3.27737e-226	cebpa
gapdh	4.5108e-229	2.63316	0.692	0.102	1.01502e-224	gapdh
si:cabz01036022.1	1.67528e-226	1.63756	0.398	0.016	3.76971e-222	si:cabz01036022.1
ppp1r14aa	7.57209e-225	1.24155	0.351	0.008	1.70387e-220	ppp1r14aa
lta4h	1.0553e-223	2.26404	0.548	0.055	2.37464e-219	lta4h
LOC101885436	4.99094e-220	1.15306	0.305	0.003	1.12306e-215	LOC101885436
ved	8.14942e-212	1.84367	0.333	0.008	1.83378e-207	ved
adam8a	1.91392e-208	2.77819	0.76	0.168	4.3067e-204	adam8a
dhrs9	3.06449e-204	1.34457	0.414	0.024	6.89572e-200	dhrs9
mmp13a	9.02289e-203	2.93831	0.464	0.037	2.03033e-198	mmp13a
timp2b1	3.33889e-200	2.24325	0.665	0.11	7.51317e-196	timp2b
slc7a3a	3.55281e-200	1.58941	0.455	0.035	7.99454e-196	slc7a3a
papss2b	3.94012e-198	1.71166	0.446	0.036	8.86606e-194	papss2b
actb2	1.21401e-194	1.9393	1	0.983	2.73176e-190	actb2
mmp25b	6.41251e-190	1.30662	0.391	0.024	1.44294e-185	mmp25b
ncf1	1.37143e-187	2.36722	0.729	0.162	3.086e-183	ncf1
srd5a2a	6.92701e-185	1.15601	0.342	0.015	1.55872e-180	srd5a2a
ank3b	9.45313e-185	1.72723	0.511	0.059	2.12714e-180	ank3b
srgn	1.51404e-184	3.06469	0.941	0.564	3.40689e-180	srgn
icn	2.7898e-181	2.68437	0.905	0.403	6.27762e-177	icn
glipr1a1	1.02609e-179	1.73276	0.543	0.069	2.3089e-175	glipr1a
si:ch211-171h4.5	1.85696e-178	1.17768	0.276	0.006	4.17853e-174	si:ch211-171h4.5
scinlb1	2.80227e-177	1.97556	0.819	0.213	6.30567e-173	scinlb
si:dkey-102g19.3	6.24679e-177	1.88634	0.674	0.123	1.40565e-172	si:dkey-102g19.3
spice1	1.733e-176	2.07862	0.615	0.118	3.8996e-172	spice1
maptb	1.98384e-171	1.24406	0.29	0.009	4.46403e-167	maptb
si:ch211-264f5.2	6.19393e-170	1.13808	0.285	0.009	1.39376e-165	si:ch211-264f5.2
il6r	1.33758e-166	2.59457	0.69	0.174	3.00982e-162	il6r
si:ch1073-443f11.2	4.69722e-165	2.02428	0.656	0.144	1.05697e-160	si:ch1073-443f11.2
hpgd	3.60349e-164	1.05553	0.262	0.006	8.10857e-160	hpgd
ryr3	4.58324e-164	1.3204	0.269	0.008	1.03132e-159	ryr3
si:dkeyp-28d2.4.1	1.16779e-159	0.895326	0.265	0.008	2.62775e-155	si:dkeyp-28d2.4.1
LOC101885706	2.94777e-157	1.40313	0.389	0.035	6.63307e-153	LOC101885706
sepw1	4.92355e-157	2.25956	0.916	0.599	1.1079e-152	sepw1
pigrl2.3	3.94973e-156	1.0864	0.274	0.01	8.88767e-152	pigrl2.3
LOC101883695	2.20248e-154	1.149	0.267	0.009	4.95602e-150	LOC101883695
myh9a	1.12302e-153	2.07391	0.665	0.159	2.52703e-149	myh9a
si:ch73-359m17.5	1.51209e-152	2.12611	0.299	0.015	3.4025e-148	si:ch73-359m17.5
spi1b	6.59363e-151	1.96367	0.876	0.398	1.4837e-146	spi1b
dub1	1.18711e-147	1.5409	0.622	0.124	2.67123e-143	dub
si:ch211-136m16.8	1.74971e-147	2.16589	0.717	0.208	3.93719e-143	si:ch211-136m16.8
vamp8	2.02068e-147	1.98207	0.584	0.123	4.54694e-143	vamp8
crip11	1.70765e-145	2.05983	0.903	0.519	3.84254e-141	crip1
unm-sa1614	1.01695e-140	1.40419	0.434	0.057	2.28835e-136	unm-sa1614
cxcr4b1	2.50558e-140	1.70824	0.966	0.547	5.63805e-136	cxcr4b
s1pr41	1.22778e-139	1.46127	0.471	0.064	2.76275e-135	s1pr4
pfn11	1.25248e-139	1.40528	0.998	0.9	2.81834e-135	pfn1
si: ch211-223l2.42	3.88819e-139	1.58359	0.769	0.214	8.74921e-135	si: ch211-223l2.4
si:ch211-193e13.5	1.49609e-136	2.14508	0.631	0.162	3.3665e-132	si:ch211-193e13.5
cotl1	1.70823e-131	1.58648	0.934	0.658	3.84386e-127	cotl1
cited4a	3.52338e-130	1.89823	0.604	0.155	7.9283e-126	cited4a
LOC558044	3.79372e-129	1.35345	0.475	0.078	8.53662e-125	LOC558044
si:dkey-185m8.21	9.87925e-126	1.29157	0.545	0.102	2.22303e-121	si:dkey-185m8.2
mid1ip1l1	2.14106e-125	1.86382	0.681	0.21	4.81781e-121	mid1ip1l
cdaa	6.47285e-124	1.20808	0.419	0.056	1.45652e-119	cdaa
LOC100329375	1.07571e-121	2.30189	0.364	0.045	2.42056e-117	LOC100329375
dachd	1.72337e-121	1.13957	0.351	0.039	3.87792e-117	dachd
tmsb1.1	1.08328e-120	1.37022	0.296	0.026	2.4376e-116	tmsb1.1
si:ch73-248e21.7.11	7.93834e-119	1.71763	0.688	0.217	1.78629e-114	si:ch73-248e21.7.1
cyp4f3	2.44131e-118	0.984217	0.274	0.021	5.49344e-114	cyp4f3
fcer1gl1	1.11032e-115	1.61487	0.943	0.551	2.49844e-111	fcer1gl
tmsb1	3.67231e-115	1.69498	0.561	0.141	8.26342e-111	tmsb1
lrrc15.1	4.78284e-115	1.29096	0.396	0.057	1.07623e-110	lrrc15.1
LOC1018825001	5.34077e-111	1.49361	0.579	0.151	1.20178e-106	LOC101882500
il34	5.69191e-109	1.0585	0.371	0.052	1.28079e-104	il34
si:ch73-295i22.2	4.31896e-108	1.62615	0.459	0.094	9.71852e-104	si:ch73-295i22.2
tpt11	2.52808e-107	1.15149	0.977	0.815	5.68869e-103	tpt1
chia.6	7.1692e-107	0.796639	0.448	0.076	1.61321e-102	chia.6
tmsb4x	1.21761e-106	0.820183	1	0.991	2.73986e-102	tmsb4x
prdx5	6.81937e-103	1.66231	0.805	0.445	1.5345e-98	prdx5
odc1	3.00986e-102	1.46487	0.41	0.073	6.7728e-98	odc1
tpm11	1.80527e-100	1.16726	0.523	0.125	4.06222e-96	tpm1
srgn.1	6.92497e-99	2.21789	0.864	0.596	1.55826e-94	srgn.1
xbp1	8.61531e-98	1.58923	0.771	0.379	1.93862e-93	xbp1
mkl1b	1.97603e-97	1.34613	0.468	0.109	4.44647e-93	mkl1b
LOC100332626	9.9687e-97	0.915972	0.319	0.041	2.24316e-92	LOC100332626
si:dkeyp-94b4.1	1.46918e-94	1.10591	0.416	0.08	3.30596e-90	si:dkeyp-94b4.1
zgc:1752641	1.58917e-92	1.23978	0.516	0.136	3.57596e-88	zgc:175264
cebpb1	1.31756e-91	1.76413	0.889	0.522	2.96478e-87	cebpb
limd21	1.84265e-88	1.30607	0.566	0.174	4.14634e-84	limd2
serpine2	1.89946e-83	0.868166	0.328	0.053	4.27415e-79	serpine2
lxn	2.58837e-83	1.31915	0.595	0.208	5.82436e-79	lxn
plpp1a1	2.96427e-83	1.12947	0.52	0.143	6.67019e-79	plpp1a
tdh	1.32315e-81	1.27529	0.548	0.166	2.97736e-77	tdh
itgb21	4.13168e-80	1.44865	0.665	0.28	9.2971e-76	itgb2
LOC7981681	6.88513e-80	0.978919	0.387	0.08	1.54929e-75	LOC798168
apol1	4.07252e-79	1.01502	0.321	0.058	9.16399e-75	apol1
LOC100537452	4.1704e-79	1.31302	0.425	0.11	9.38423e-75	LOC100537452
wu:fb05h10	7.69304e-79	1.30543	0.43	0.106	1.73109e-74	wu:fb05h10
pald1a	7.90393e-79	1.20393	0.534	0.172	1.77854e-74	pald1a
LOC1005378031	2.98906e-78	1.19747	0.765	0.373	6.72599e-74	LOC100537803
mapk11	3.17946e-78	1.15945	0.425	0.109	7.15442e-74	mapk11
si:dkey-262k9.41	2.61094e-77	0.972149	0.455	0.112	5.87513e-73	si:dkey-262k9.4
pgd	2.97159e-77	1.21007	0.502	0.157	6.68667e-73	pgd
calm1b1	3.18726e-77	0.908036	0.563	0.159	7.17196e-73	calm1b
cfl1	7.64917e-77	0.876438	0.941	0.817	1.72122e-72	cfl1
atp1a3a	1.69174e-76	0.993976	0.294	0.049	3.80676e-72	atp1a3a
mapre1a1	4.19805e-76	1.31841	0.706	0.33	9.44646e-72	mapre1a
arpc21	2.86982e-75	1.08982	0.848	0.557	6.45767e-71	arpc2
gpia	3.30407e-75	1.10423	0.518	0.163	7.43481e-71	gpia
LOC110438666	4.07815e-75	1.04076	0.525	0.164	9.17666e-71	LOC110438666
hopx	1.25975e-74	0.905618	0.299	0.05	2.83469e-70	hopx
LOC110440201	5.5107e-74	1.22433	0.414	0.109	1.24002e-69	LOC110440201
wasb1	1.23268e-73	1.38062	0.751	0.4	2.77378e-69	wasb
fybb1	2.30222e-73	1.46022	0.67	0.306	5.18045e-69	fybb
si:ch73-343l4.2	3.44292e-72	1.04033	0.333	0.066	7.74725e-68	si:ch73-343l4.2
zdhhc20a	4.14901e-70	0.969359	0.346	0.075	9.33609e-66	zdhhc20a
ptprr	6.58782e-70	0.80628	0.262	0.041	1.48239e-65	ptprr
actn1	2.51105e-67	0.824163	0.271	0.045	5.65036e-63	actn1
cmtm7	4.82768e-67	0.930732	0.36	0.085	1.08633e-62	cmtm7
arpc1b1	6.26309e-67	1.00244	0.864	0.567	1.40932e-62	arpc1b
si:dkey-16n15.3	7.51512e-67	1.09936	0.421	0.122	1.69105e-62	si:dkey-16n15.3
cnp	1.26908e-65	1.30092	0.64	0.308	2.85568e-61	cnp
skap2	2.45515e-65	1.30412	0.622	0.292	5.52459e-61	skap2
si:dkey-24p1.71	2.45705e-65	1.28935	0.557	0.218	5.52886e-61	si:dkey-24p1.7
si:ch73-208g10.11	4.16875e-65	0.676157	0.448	0.117	9.38053e-61	si:ch73-208g10.1
spag1a	1.97653e-64	0.838493	0.314	0.068	4.4476e-60	spag1a
pygb	2.12409e-64	0.897278	0.308	0.065	4.77962e-60	pygb
hmha1b1	2.74035e-64	0.955851	0.498	0.156	6.16633e-60	hmha1b
aldoaa	3.62679e-62	1.22959	0.722	0.432	8.16101e-58	aldoaa
zgc:56493	3.92693e-61	0.990121	0.864	0.643	8.83637e-57	zgc:56493
arpc31	5.04071e-60	0.98815	0.824	0.534	1.13426e-55	arpc3
stx11a	6.63241e-60	1.18878	0.541	0.216	1.49242e-55	stx11a
id31	6.72627e-60	0.713747	0.652	0.278	1.51355e-55	id3
arrb2a	1.07801e-59	0.662714	0.251	0.044	2.42574e-55	arrb2a
vamp8.1	4.12224e-59	1.1946	0.267	0.054	9.27586e-55	vamp8.1
zgc:1530732	2.46946e-57	1.33211	0.715	0.37	5.55678e-53	zgc:153073
tpd52l2b1	4.35802e-57	0.99196	0.482	0.174	9.80642e-53	tpd52l2b
rab11ba	4.51004e-56	1.16321	0.532	0.226	1.01485e-51	rab11ba
cybb1	1.71825e-55	0.93583	0.412	0.13	3.86641e-51	cybb
rac22	1.17528e-54	0.929222	0.826	0.507	2.64461e-50	rac2
antxr2a.1	1.85143e-54	0.953188	0.274	0.06	4.16609e-50	antxr2a.1
romo11	3.2929e-54	0.980446	0.819	0.586	7.40969e-50	romo1
cbx7a1	2.3512e-52	0.839209	0.484	0.176	5.29067e-48	cbx7a
anxa1a	1.90768e-51	0.861289	0.333	0.087	4.29265e-47	anxa1a
myh11a1	1.11799e-50	0.472089	0.376	0.102	2.51571e-46	myh11a
gsr	7.68528e-50	0.82411	0.4	0.134	1.72934e-45	gsr
rab441	1.11771e-49	1.24836	0.604	0.287	2.51508e-45	rab44
lcp1	1.22769e-49	0.910718	0.317	0.088	2.76254e-45	lcp1
cd991	5.57331e-49	0.686429	0.369	0.107	1.25411e-44	cd99
rnf144b	6.28916e-49	0.905427	0.319	0.09	1.41519e-44	rnf144b
lasp11	8.76608e-49	1.03438	0.733	0.486	1.97254e-44	lasp1
eno3	1.01666e-48	1.02956	0.742	0.499	2.2877e-44	eno3
ccdc88b	4.78474e-48	1.01795	0.489	0.206	1.07666e-43	ccdc88b
si:ch211-105j21.91	1.07329e-47	0.580427	0.369	0.105	2.41512e-43	si:ch211-105j21.9
raraa	1.35773e-46	1.20433	0.256	0.06	3.05517e-42	raraa
gyg1a	5.45194e-46	0.942543	0.425	0.16	1.22679e-41	gyg1a
arhgdig1	1.30652e-45	0.863307	0.783	0.508	2.93994e-41	arhgdig
myo1f	2.30769e-45	0.859954	0.285	0.078	5.19277e-41	myo1f
nfil3-6	4.25821e-45	0.982194	0.439	0.163	9.58183e-41	nfil3-6
cited4b.1	7.55428e-45	0.888341	0.428	0.16	1.69986e-40	cited4b.1
si:dkey-56i24.11	9.98097e-45	0.659308	0.355	0.106	2.24592e-40	si:dkey-56i24.1
pttg1ipa	1.40316e-44	0.763574	0.294	0.082	3.15739e-40	pttg1ipa
LOC103909972	1.75786e-44	0.949732	0.373	0.13	3.95554e-40	LOC103909972
abhd2a	3.00847e-44	0.760074	0.251	0.059	6.76966e-40	abhd2a
tubb4b	4.1833e-44	0.839299	0.79	0.551	9.41325e-40	tubb4b
pde7a1	6.70316e-44	0.787243	0.43	0.16	1.50835e-39	pde7a
tktb	1.40581e-43	0.906875	0.495	0.22	3.16335e-39	tktb
add3a1	1.6354e-43	1.07584	0.536	0.262	3.67997e-39	add3a
zgc:194312	2.37953e-43	0.849941	0.353	0.118	5.35442e-39	zgc:194312
unc13d1	4.41079e-43	0.645112	0.285	0.075	9.92517e-39	unc13d
coro1a	5.6018e-43	0.66793	0.305	0.088	1.26052e-38	coro1a
arpc5b1	6.14252e-43	0.968758	0.579	0.3	1.38219e-38	arpc5b
tmem30ab	1.93113e-42	1.01455	0.362	0.127	4.34544e-38	tmem30ab
reep51	4.53525e-42	0.8553	0.584	0.302	1.02052e-37	reep5
LOC1039091151	6.47481e-42	0.910892	0.667	0.392	1.45696e-37	LOC103909115
lpar5a1	8.63939e-42	0.828905	0.548	0.256	1.94404e-37	lpar5a
tpm3	1.16353e-41	0.85352	0.717	0.452	2.61818e-37	tpm3
ak2	1.77489e-41	1.15555	0.509	0.256	3.99387e-37	ak2
slc9a1a	3.9713e-41	0.858629	0.367	0.127	8.93622e-37	slc9a1a
alox12	1.49641e-40	0.862805	0.283	0.083	3.36723e-36	alox12
ncf2	1.63029e-40	0.737504	0.262	0.071	3.66848e-36	ncf2
si:dkey-180p18.9	2.16303e-40	1.00446	0.507	0.25	4.86725e-36	si:dkey-180p18.9
rsl24d11	5.93765e-40	0.81509	0.796	0.634	1.33609e-35	rsl24d1
stim1a	6.2722e-40	0.689517	0.287	0.083	1.41137e-35	stim1a
anxa2a	6.46154e-40	0.7958	0.314	0.094	1.45398e-35	anxa2a
vaspa1	8.27438e-40	0.691141	0.33	0.108	1.8619e-35	vaspa
f11r.1	1.00553e-39	0.843237	0.33	0.111	2.26264e-35	f11r.1
larp6	1.87884e-39	0.796232	0.348	0.125	4.22778e-35	larp6
gapdhs	5.93517e-39	0.845377	0.826	0.617	1.33553e-34	gapdhs
si:ch1073-340j19.1	7.16871e-39	0.686778	0.29	0.086	1.6131e-34	si:ch1073-340j19.1
gnai2b1	8.99389e-39	0.51274	0.301	0.086	2.02381e-34	gnai2b
si:ch211-102c2.4	1.33279e-38	0.795564	0.514	0.225	2.99903e-34	si:ch211-102c2.4
sri1	2.5177e-38	0.84197	0.747	0.452	5.66533e-34	sri
ppiab	4.15781e-38	0.584257	0.907	0.769	9.35591e-34	ppiab
ppiaa1	1.03435e-37	0.534828	0.968	0.859	2.32749e-33	ppiaa
arhgef3l1	1.69617e-37	0.480766	0.253	0.066	3.81672e-33	arhgef3l
si:ch73-1a9.3	2.76402e-37	0.67382	0.762	0.509	6.2196e-33	si:ch73-1a9.3
zyx	3.32318e-37	0.735126	0.373	0.142	7.47781e-33	zyx
si:ch211-222l21.1	1.06361e-36	0.472801	0.692	0.368	2.39334e-32	si:ch211-222l21.1
hlx1	1.8397e-36	0.75409	0.346	0.125	4.13969e-32	hlx1
si:dkey-222f2.71	3.22413e-36	1.16249	0.376	0.155	7.25495e-32	si:dkey-222f2.7
gnai1	4.83623e-36	0.815688	0.561	0.3	1.08825e-31	gnai1
apbb1ip1	5.74521e-36	0.692668	0.385	0.151	1.29279e-31	apbb1ip
LOC5587611	1.63781e-35	0.769445	0.4	0.166	3.68539e-31	LOC558761
tagln21	8.93631e-35	0.670461	0.527	0.242	2.01085e-30	tagln2
LOC795545.1	2.98518e-34	0.588165	1	0.99	6.71725e-30	LOC795545.1
grk6	8.9404e-34	0.803587	0.387	0.163	2.01177e-29	grk6
si:ch73-248e21.5.11	1.77551e-33	0.867622	0.373	0.152	3.99526e-29	si:ch73-248e21.5.1
hmgn2	2.21255e-33	0.470745	0.867	0.661	4.97868e-29	hmgn2
parvg1	2.25968e-33	0.654589	0.443	0.204	5.08473e-29	parvg
syngr2a	2.34024e-33	0.831173	0.473	0.239	5.26601e-29	syngr2a
rhogb1	3.69831e-33	0.826824	0.577	0.313	8.32193e-29	rhogb
fermt3b1	6.96487e-33	0.542476	0.337	0.123	1.56724e-28	fermt3b
myl12.11	7.09524e-33	0.661572	0.808	0.632	1.59657e-28	myl12.1
nme2b.12	1.68564e-32	0.455638	0.962	0.908	3.79303e-28	nme2b.1
zgc:165573	2.54751e-32	0.79971	0.484	0.237	5.73242e-28	zgc:165573
LOC794598	4.14956e-32	0.700541	0.346	0.136	9.33735e-28	LOC794598
tnfaip8l2a1	5.29057e-32	0.694371	0.389	0.166	1.19048e-27	tnfaip8l2a
cyba1	6.84579e-32	0.687826	0.71	0.399	1.54044e-27	cyba
rpl221	1.0776e-31	0.480655	0.959	0.847	2.42482e-27	rpl22
b3gnt2b	1.53372e-31	0.706607	0.303	0.109	3.45118e-27	b3gnt2b
capzb	3.63369e-31	0.750855	0.699	0.468	8.17653e-27	capzb
c13h10orf11	7.03677e-31	0.701513	0.26	0.085	1.58341e-26	c13h10orf11
LOC101884510	7.40801e-31	0.697337	0.308	0.114	1.66695e-26	LOC101884510
sptlc2a1	8.8988e-31	0.479126	0.33	0.122	2.00241e-26	sptlc2a
def6a1	1.68405e-30	0.562698	0.281	0.094	3.78945e-26	def6a
elovl1b	2.64056e-30	0.778276	0.661	0.422	5.94179e-26	elovl1b
dbi	2.90025e-30	0.874896	0.575	0.358	6.52613e-26	dbi
ncf4.1	2.29718e-29	0.564004	0.258	0.086	5.16912e-25	ncf4.1
tpi1b1	1.07626e-28	0.687618	0.443	0.216	2.42179e-24	tpi1b
serf21	1.88583e-28	0.701828	0.701	0.504	4.2435e-24	serf2
plxnc11	3.33267e-28	0.806034	0.575	0.325	7.49917e-24	plxnc1
zgc:638311	3.70771e-28	0.701475	0.699	0.452	8.3431e-24	zgc:63831
farsa	5.71055e-28	0.590047	0.256	0.089	1.28499e-23	farsa
cox8a	1.79235e-27	0.652184	0.762	0.55	4.03315e-23	cox8a
hsp90ab11	2.13574e-27	0.464055	0.975	0.916	4.80585e-23	hsp90ab1
zmp:00000010821	2.37266e-27	0.687959	0.416	0.198	5.33896e-23	zmp:0000001082
si:dkey-222f8.31	2.75853e-27	0.671918	0.489	0.266	6.20724e-23	si:dkey-222f8.3
smap2	2.85814e-27	0.680648	0.283	0.109	6.4314e-23	smap2
glo1	1.84048e-26	0.774772	0.509	0.294	4.14144e-22	glo1
cirbpb1	2.18169e-26	0.616144	0.894	0.798	4.90924e-22	cirbpb
fmnl1a1	3.43846e-26	0.568274	0.385	0.177	7.73723e-22	fmnl1a
sh3bgrl3	3.61212e-26	0.653695	0.545	0.328	8.12798e-22	sh3bgrl3
tmx1	4.47173e-26	0.658141	0.335	0.146	1.00623e-21	tmx1
ccdc28a	4.86417e-26	0.763396	0.516	0.305	1.09454e-21	ccdc28a
si:dkey-53k12.21	1.17932e-25	0.746255	0.443	0.236	2.65371e-21	si:dkey-53k12.2
wbp2nl	3.44322e-25	0.705507	0.701	0.485	7.74794e-21	wbp2nl
arpc41	5.62274e-25	0.694751	0.588	0.369	1.26523e-20	arpc4
plek1	9.14138e-25	0.636548	0.477	0.262	2.05699e-20	plek
fbp1a	2.70403e-24	0.587437	0.253	0.094	6.08461e-20	fbp1a
nsa21	2.96133e-24	0.586354	0.774	0.606	6.66357e-20	nsa2
si:ch211-66e2.31	3.11936e-24	0.649715	0.498	0.281	7.01919e-20	si:ch211-66e2.3
rpl191	4.37245e-24	0.409939	0.959	0.91	9.83889e-20	rpl19
gpr183a1	5.82366e-24	0.461636	0.41	0.191	1.31044e-19	gpr183a
nfkbiab1	7.11077e-24	0.853877	0.724	0.514	1.60007e-19	nfkbiab
sh3bgrl.2	2.15237e-23	0.637136	0.317	0.143	4.84326e-19	sh3bgrl.2
gng51	3.6645e-23	0.631535	0.595	0.386	8.24587e-19	gng5
ran1	7.94905e-23	0.535362	0.767	0.59	1.7887e-18	ran
tsc22d31	9.53791e-23	0.958263	0.595	0.388	2.14622e-18	tsc22d3
eif3g1	1.58199e-22	0.632553	0.652	0.468	3.55978e-18	eif3g
ak1	2.00335e-22	0.444116	0.457	0.255	4.50793e-18	ak1
cdc421	2.45308e-22	0.625453	0.602	0.399	5.51992e-18	cdc42
twf1a	2.47338e-22	0.655848	0.421	0.232	5.5656e-18	twf1a
tomm20b	2.67745e-22	0.654183	0.502	0.313	6.02479e-18	tomm20b
cyth4b	2.71119e-22	0.545922	0.292	0.125	6.10072e-18	cyth4b
eif3f1	3.9922e-22	0.476731	0.794	0.626	8.98325e-18	eif3f
sh3glb1b	5.70738e-22	0.4665	0.267	0.111	1.28427e-17	sh3glb1b
fam49ba1	1.22744e-21	0.590692	0.389	0.203	2.76199e-17	fam49ba
far1	1.67141e-21	0.358162	0.267	0.104	3.76102e-17	far1
wasa1	1.97582e-21	0.311672	0.416	0.203	4.44598e-17	wasa
scamp2	2.82031e-21	0.610265	0.391	0.209	6.34626e-17	scamp2
hcls12	3.54608e-21	0.604229	0.638	0.398	7.9794e-17	hcls1
pdhb	3.86542e-21	0.567213	0.285	0.127	8.69797e-17	pdhb
mtpn	5.97223e-21	0.586098	0.502	0.309	1.34387e-16	mtpn
eif3m1	6.82301e-21	0.475642	0.71	0.522	1.53531e-16	eif3m
tcea31	1.65237e-20	0.652863	0.371	0.197	3.71816e-16	tcea3
degs1	1.71285e-20	0.571721	0.357	0.179	3.85424e-16	degs1
h1fx1	3.84142e-20	0.823403	0.742	0.549	8.64395e-16	h1fx
rdh12l	7.55875e-20	0.538272	0.29	0.134	1.70087e-15	rdh12l
ccni1	1.14804e-19	0.459182	0.801	0.658	2.58331e-15	ccni
tpst1l	1.54827e-19	0.634042	0.258	0.115	3.48392e-15	tpst1l
srprb	2.70856e-19	0.531902	0.256	0.112	6.09481e-15	srprb
h3f3a	2.79636e-19	0.487494	0.654	0.462	6.29237e-15	h3f3a
cox5aa	3.47921e-19	0.46863	0.706	0.506	7.82891e-15	cox5aa
mob1a.11	3.48664e-19	0.553646	0.548	0.352	7.84564e-15	mob1a.1
LOC1039114301	3.59644e-19	0.548894	0.391	0.211	8.09272e-15	LOC103911430
naca1	8.21121e-19	0.343378	0.912	0.826	1.84769e-14	naca
pkma	9.47817e-19	0.579456	0.584	0.409	2.13278e-14	pkma
rplp01	9.65804e-19	0.330441	0.964	0.92	2.17325e-14	rplp0
antxr2a	5.27253e-18	0.569695	0.319	0.157	1.18642e-13	antxr2a
ppp1r12a	7.30967e-18	0.530245	0.353	0.187	1.64482e-13	ppp1r12a
lbr	1.35873e-17	0.530285	0.256	0.113	3.05742e-13	lbr
nck1a1	1.38546e-17	0.58343	0.391	0.229	3.11757e-13	nck1a
zgc:1540551	2.02394e-17	0.354608	0.278	0.127	4.55428e-13	zgc:154055
aldocb	5.0646e-17	0.443672	0.301	0.146	1.13964e-12	aldocb
wdr1	6.23032e-17	0.548929	0.45	0.277	1.40195e-12	wdr1
spcs3	1.60945e-16	0.577563	0.41	0.249	3.62158e-12	spcs3
mlx1	1.68451e-16	0.586317	0.387	0.232	3.79048e-12	mlx
arl6ip1.11	2.51767e-16	0.409033	0.561	0.359	5.66527e-12	arl6ip1.1
LOC100535890	2.58994e-16	0.518873	0.26	0.122	5.82789e-12	LOC100535890
clic11	5.66342e-16	0.460536	0.579	0.406	1.27438e-11	clic1
tmed2	7.2619e-16	0.550469	0.493	0.337	1.63407e-11	tmed2
cap1	8.50168e-16	0.540203	0.317	0.173	1.91305e-11	cap1
ube2e11	4.33118e-15	0.445486	0.362	0.203	9.74601e-11	ube2e1
metrnl	7.45736e-15	0.443291	0.29	0.149	1.67806e-10	metrnl
zgc:77650.1	1.07618e-14	0.361593	0.312	0.164	2.42162e-10	zgc:77650.1
tln11	1.19815e-14	0.485943	0.656	0.496	2.69607e-10	tln1
cnn2	1.22209e-14	0.502552	0.532	0.364	2.74994e-10	cnn2
pak2a	1.98345e-14	0.555412	0.43	0.276	4.46316e-10	pak2a
aldh2.2	2.24661e-14	0.487505	0.267	0.136	5.05533e-10	aldh2.2
rps22	2.3637e-14	0.250985	0.975	0.931	5.31879e-10	rps2
eif3d	3.2491e-14	0.375226	0.495	0.335	7.31112e-10	eif3d
ywhaba1	3.3804e-14	0.449345	0.579	0.419	7.60657e-10	ywhaba
cst14b.11	3.85329e-14	0.556957	0.509	0.339	8.67067e-10	cst14b.1
itm2bb1	3.98936e-14	0.380735	0.842	0.647	8.97685e-10	itm2bb
park7	5.20091e-14	0.371294	0.267	0.138	1.17031e-09	park7
pgk1	6.29992e-14	0.438676	0.439	0.283	1.41761e-09	pgk1
ptpn22	1.00205e-13	0.448901	0.283	0.152	2.25482e-09	ptpn22
cox171	1.10628e-13	0.45715	0.423	0.269	2.48936e-09	cox17
sumo2b1	2.03248e-13	0.448175	0.595	0.445	4.57349e-09	sumo2b
vdac1	4.20945e-13	0.33781	0.303	0.167	9.47211e-09	vdac1
actr2a1	5.78867e-13	0.505174	0.514	0.361	1.30257e-08	actr2a
tmed7	7.12661e-13	0.442064	0.559	0.416	1.60363e-08	tmed7
sarnp	7.55606e-13	0.469683	0.441	0.301	1.70027e-08	sarnp
h3f3b.1	8.08712e-13	0.512166	0.581	0.423	1.81976e-08	h3f3b.1
anxa4	9.31554e-13	0.300585	0.57	0.404	2.09618e-08	anxa4
pik3cb	9.58673e-13	0.398191	0.26	0.136	2.15721e-08	pik3cb
si:dkey-97a13.6	1.3224e-12	0.497665	0.271	0.148	2.97567e-08	si:dkey-97a13.6
abracl	1.60322e-12	0.415842	0.511	0.355	3.60757e-08	abracl
cetn4	2.11906e-12	0.299864	0.278	0.151	4.76832e-08	cetn4
cox4i1	2.42582e-12	0.350388	0.819	0.698	5.45858e-08	cox4i1
ef11	2.51037e-12	0.384168	0.486	0.333	5.64883e-08	ef1
ldha	2.54924e-12	0.387839	0.281	0.149	5.7363e-08	ldha
plekho21	3.00156e-12	0.491829	0.333	0.198	6.7541e-08	plekho2
rin3	4.18622e-12	0.497141	0.285	0.16	9.41983e-08	rin3
si:ch211-214j24.101	5.11665e-12	0.461013	0.405	0.265	1.15135e-07	si:ch211-214j24.10
prkab1b	5.13922e-12	0.393148	0.493	0.351	1.15643e-07	prkab1b
si:zfos-741a10.31	6.27011e-12	0.365041	0.376	0.226	1.4109e-07	si:zfos-741a10.3
ppifb	1.08385e-11	0.514993	0.364	0.238	2.43888e-07	ppifb
sec61b	1.2741e-11	0.543428	0.5	0.381	2.86697e-07	sec61b
eef1da1	2.21799e-11	0.450248	0.631	0.515	4.99093e-07	eef1da
cct5	2.50197e-11	0.370049	0.441	0.302	5.62994e-07	cct5
si:ch73-203a8.11	3.61087e-11	0.462972	0.382	0.245	8.12517e-07	si:ch73-203a8.1
grap2b2	6.42494e-11	0.365153	0.477	0.325	1.44574e-06	grap2b
arhgap151	9.13248e-11	0.370264	0.299	0.175	2.05499e-06	arhgap15
serpinb1l1	1.42626e-10	0.41057	0.367	0.241	3.20936e-06	serpinb1l1
dynlrb1	2.64076e-10	0.406029	0.33	0.211	5.94224e-06	dynlrb1
magt1	2.95488e-10	0.409173	0.412	0.29	6.64906e-06	magt1
eef1g1	3.21178e-10	0.279751	0.887	0.782	7.22714e-06	eef1g
fgfr1op2	3.67096e-10	0.393438	0.256	0.147	8.26039e-06	fgfr1op2
zgc:92027.11	3.75269e-10	0.37062	0.443	0.314	8.4443e-06	zgc:92027.1
blcap	4.70357e-10	0.313564	0.398	0.271	1.0584e-05	blcap
cklf1	6.97465e-10	0.557877	0.256	0.15	1.56944e-05	cklf
zgc:1585641	8.1701e-10	0.340033	0.382	0.255	1.83843e-05	zgc:158564
caprin1b	8.42882e-10	0.407566	0.477	0.348	1.89665e-05	caprin1b
p4hb.1	1.04591e-09	0.508631	0.443	0.326	2.35352e-05	p4hb.1
ssr2	1.44278e-09	0.474941	0.434	0.325	3.24655e-05	ssr2
fth1a	1.70338e-09	0.281532	0.758	0.617	3.83294e-05	fth1a
actb11	2.55672e-09	0.452212	0.271	0.166	5.75314e-05	actb1
unkl	2.56925e-09	0.393457	0.274	0.166	5.78132e-05	unkl
spcs1	2.7437e-09	0.353339	0.457	0.34	6.17386e-05	spcs1
eef1db	5.111e-09	0.322981	0.76	0.64	0.000115008	eef1db
mvp	6.96667e-09	0.36921	0.319	0.208	0.000156764	mvp
mff	7.32485e-09	0.334655	0.253	0.152	0.000164824	mff
LOC1018860151	7.4127e-09	0.295969	0.256	0.149	0.000166801	LOC101886015
eif3i	8.20104e-09	0.306388	0.448	0.329	0.00018454	eif3i
LOC1081796921	1.32099e-08	0.262162	0.457	0.293	0.000297248	LOC108179692
ube4b	1.37148e-08	0.568679	0.271	0.173	0.00030861	ube4b
smdt1b	1.45777e-08	0.32741	0.43	0.311	0.000328028	smdt1b
eif2s3	2.15651e-08	0.36915	0.471	0.364	0.000485257	eif2s3
im:71540362	2.16701e-08	0.301399	0.394	0.271	0.000487621	im:7154036
2022-03-07	3.27966e-08	0.33714	0.267	0.168	0.000737988	2022-03-07
jpt2	3.51465e-08	0.287436	0.452	0.332	0.000790868	jpt2
mcl1b1	5.75183e-08	0.452566	0.489	0.381	0.00129428	mcl1b
ywhaz	1.0604e-07	0.277805	0.466	0.352	0.00238611	ywhaz
tceb1b	1.22746e-07	0.261225	0.403	0.296	0.00276204	tceb1b
zgc:136864	1.52846e-07	0.317813	0.31	0.21	0.00343934	zgc:136864
rca2.1	1.71808e-07	0.386687	0.452	0.343	0.00386602	rca2.1
copz1	1.96481e-07	0.334742	0.326	0.226	0.00442122	copz1
fam162a	2.03004e-07	0.337038	0.321	0.221	0.00456799	fam162a
lamtor4	2.71769e-07	0.323242	0.389	0.281	0.00611534	lamtor4
ola11	2.86924e-07	0.315799	0.466	0.359	0.00645636	ola1
h3f3c	3.73678e-07	0.300428	0.333	0.234	0.00840851	h3f3c
sptssa	9.52287e-07	0.298577	0.269	0.179	0.0214284	sptssa
eif3s6ip1	1.24225e-06	0.301012	0.348	0.251	0.0279531	eif3s6ip
eif3ha1	2.89352e-06	0.277948	0.407	0.311	0.0651101	eif3ha
si:ch211-213a13.12	3.09524e-06	0.379655	0.502	0.394	0.0696491	si:ch211-213a13.1
selt1a	3.92992e-06	0.33588	0.342	0.249	0.088431	selt1a
aldh6a1	8.90963e-06	0.258367	0.265	0.18	0.200485	aldh6a1
cmip	2.28563e-05	0.258548	0.276	0.197	0.514313	cmip
crfb6	3.0599e-05	0.314482	0.299	0.221	0.68854	crfb6
LOC101886073.11	3.11167e-05	0.269481	0.269	0.186	0.700188	LOC101886073.1
sypl2b	3.55662e-05	0.345802	0.258	0.184	0.800311	sypl2b
wu:fj29h112	3.64351e-05	0.319076	0.389	0.305	0.819862	wu:fj29h11
osbpl9	4.60084e-05	0.313361	0.328	0.246	1	osbpl9
dock81	8.05173e-05	0.297776	0.299	0.224	1	dock8
znf706	9.66577e-05	0.417033	0.339	0.272	1	znf706
samsn1a1	0.00015034	0.274321	0.294	0.222	1	samsn1a
c5ar11	0.000239388	0.259517	0.276	0.201	1	c5ar1
grn21	0.000245764	0.721393	0.667	0.759	1	grn2
LOC1081836741	0.000400522	0.255586	0.328	0.261	1	LOC108183674
notch21	0.000440936	0.339776	0.308	0.244	1	notch2
dusp12	0.000942386	0.440155	0.385	0.322	1	dusp1
ssr4	0.00134893	0.263659	0.423	0.368	1	ssr4
histh1l1	0.00144085	0.381865	0.566	0.503	1	histh1l
prdx4	0.00781944	0.26935	0.256	0.213	1	prdx4

## Sheet: distal tubule
	p_val	avg_log2FC	pct.1	pct.2	p_val_adj	gene
si:ch73-359m17.9	0	3.57705	0.565	0.026	0	si:ch73-359m17.9
sgk2a	1.11957e-267	2.33537	0.423	0.011	2.51926e-263	sgk2a
cdh17	1.15493e-259	3.62165	0.484	0.025	2.59882e-255	cdh17
atp1a1a.4	2.2416e-252	4.1676	0.458	0.021	5.04404e-248	atp1a1a.4
arg2	8.52132e-234	2.92694	0.393	0.014	1.91747e-229	arg2
cdh1	8.79028e-229	2.48469	0.384	0.013	1.97799e-224	cdh1
cox5b2	1.10764e-228	2.54835	0.453	0.027	2.49242e-224	cox5b2
hsd11b2	4.75631e-224	2.45546	0.398	0.016	1.07026e-219	hsd11b2
spint2.1	5.98448e-209	2.24669	0.33	0.008	1.34663e-204	spint2.1
rhcgb	2.62461e-203	3.19278	0.305	0.006	5.90589e-199	rhcgb
bin2a	1.31143e-200	2.1809	0.309	0.007	2.95098e-196	bin2a
si:ch211-139a5.9	3.36043e-190	2.84138	0.365	0.019	7.56163e-186	si:ch211-139a5.9
si:ch211-153b23.5	1.95547e-188	2.76742	0.307	0.009	4.4002e-184	si:ch211-153b23.5
mb	3.75248e-188	3.87554	0.423	0.033	8.44383e-184	mb
si:ch73-14h1.2	4.11588e-187	2.14446	0.253	0.001	9.26155e-183	si:ch73-14h1.2
aldob	4.38208e-177	2.87675	0.46	0.046	9.86056e-173	aldob
si:dkey-96g2.1	3.04194e-174	1.77389	0.258	0.004	6.84496e-170	si:dkey-96g2.1
sstr5	1.92532e-172	1.64589	0.251	0.003	4.33235e-168	sstr5
krt91	5.39262e-160	3.83851	0.351	0.026	1.21345e-155	krt91
agr2	1.13395e-155	1.77853	0.265	0.008	2.55161e-151	agr2
tspan35	6.01031e-145	1.67508	0.26	0.01	1.35244e-140	tspan35
bhmt	1.98861e-139	2.90864	0.258	0.012	4.47477e-135	bhmt
pax2a	1.92305e-117	1.75652	0.258	0.017	4.32724e-113	pax2a
cldnb	9.90246e-117	1.62977	0.253	0.016	2.22825e-112	cldnb
cd9b	6.97138e-116	1.61865	0.342	0.039	1.5687e-111	cd9b
cldnh	4.20476e-107	2.66188	0.367	0.059	9.46155e-103	cldnh
si:ch211-207n23.2	4.34631e-95	2.08592	0.253	0.024	9.78007e-91	si:ch211-207n23.2
hoxb8a	5.34274e-92	1.80522	0.279	0.034	1.20222e-87	hoxb8a
glsb	7.45437e-86	2.25425	0.347	0.066	1.67738e-81	glsb
atp1b1a	2.59374e-84	3.19039	0.828	0.616	5.83643e-80	atp1b1a
gpd1b	1.5953e-79	1.29164	0.251	0.031	3.58974e-75	gpd1b
slc25a51	3.78446e-74	1.13239	0.981	0.931	8.5158e-70	slc25a5
ndrg3a	6.89335e-68	1.42587	0.281	0.051	1.55114e-63	ndrg3a
si:ch73-335l21.4	7.12525e-64	1.56666	0.314	0.067	1.60332e-59	si:ch73-335l21.4
atp5g3b	2.74942e-63	1.63814	0.791	0.634	6.18675e-59	atp5g3b
LOC110439800	1.77664e-54	5.21036	0.309	0.081	3.99779e-50	LOC110439800
grn11	1.43266e-49	1.91188	0.949	0.882	3.22377e-45	grn1
ndrg1a	1.38403e-47	2.55912	0.498	0.258	3.11435e-43	ndrg1a
fth1a1	4.23408e-46	1.18028	0.765	0.616	9.52752e-42	fth1a
cdaa1	5.4926e-46	1.4901	0.281	0.075	1.23594e-41	cdaa
tuba8l2	4.30292e-40	1.10699	0.291	0.089	9.68244e-36	tuba8l2
ldhba	2.1795e-39	1.724	0.533	0.321	4.90431e-35	ldhba
chia.61	3.43618e-39	2.17046	0.295	0.096	7.73209e-35	chia.6
LOC110437731	5.90885e-38	1.50055	0.344	0.123	1.32961e-33	LOC110437731
atp5l	1.15503e-37	1.03587	0.74	0.623	2.59906e-33	atp5l
fabp31	4.92805e-37	1.55235	0.551	0.337	1.10891e-32	fabp3
si:dkey-33i11.9	9.04467e-36	1.59582	0.498	0.251	2.03523e-31	si:dkey-33i11.9
atp5b	6.83172e-35	1.39163	0.642	0.526	1.53727e-30	atp5b
uqcrb	5.36157e-34	1.34005	0.6	0.452	1.20646e-29	uqcrb
atp5a1	5.9945e-34	1.39612	0.595	0.459	1.34888e-29	atp5a1
cox6b2	6.96873e-34	0.931832	0.749	0.637	1.5681e-29	cox6b2
tdh1	2.22401e-33	1.17882	0.414	0.184	5.00446e-29	tdh
tmem176l.41	3.03022e-30	1.54607	0.351	0.162	6.8186e-26	tmem176l.4
atp5e	3.47952e-30	1.03621	0.681	0.57	7.82962e-26	atp5e
cox6a21	3.38822e-28	1.43257	0.405	0.215	7.62418e-24	cox6a2
cox6c	5.25056e-27	1.0092	0.647	0.531	1.18148e-22	cox6c
mdh1aa	2.19953e-26	1.25571	0.565	0.434	4.94939e-22	mdh1aa
cox4i11	5.45484e-24	0.679249	0.784	0.702	1.22745e-19	cox4i1
ca2	1.63869e-23	1.40979	0.33	0.162	3.68738e-19	ca2
grn22	6.75161e-23	0.814672	0.814	0.74	1.51925e-18	grn2
ak11	1.08403e-22	1.5607	0.428	0.259	2.43927e-18	ak1
mdh2	1.10436e-22	1.3031	0.502	0.389	2.48502e-18	mdh2
atp5j	1.61843e-22	1.06028	0.574	0.475	3.6418e-18	atp5j
gstk1	1.3885e-21	1.02548	0.307	0.148	3.12441e-17	gstk1
2022-06-01	2.09387e-21	1.15514	0.353	0.178	4.71162e-17	jun
mpc1	2.97118e-21	1.21734	0.391	0.236	6.68575e-17	mpc1
alas1	7.86184e-21	1.16616	0.288	0.139	1.76907e-16	alas1
chac11	9.0135e-21	1.56308	0.377	0.218	2.02822e-16	chac1
mavs	9.15249e-21	1.23881	0.284	0.135	2.05949e-16	mavs
ndufa4l	3.93432e-20	0.798237	0.709	0.678	8.853e-16	ndufa4l
atp5h	3.08914e-19	1.095	0.537	0.442	6.95119e-15	atp5h
anxa41	7.48078e-19	1.08335	0.535	0.409	1.68333e-14	anxa4
atp5o	1.25708e-18	1.29962	0.486	0.399	2.82868e-14	atp5o
eef1a1l1	1.50185e-18	0.441454	0.991	0.966	3.37945e-14	eef1a1l1
tspo	2.12165e-18	1.24446	0.347	0.203	4.77415e-14	tspo
cox8b1	3.95882e-18	1.26315	0.493	0.384	8.90815e-14	cox8b
vdac2	4.0907e-17	1.01335	0.551	0.483	9.2049e-13	vdac2
cs	8.56114e-17	0.80161	0.321	0.177	1.92643e-12	cs
cox6b1	1.56265e-16	1.43635	0.421	0.316	3.51628e-12	cox6b1
atpif1a	2.12453e-16	0.888979	0.512	0.418	4.78062e-12	atpif1a
cox7b	2.87756e-16	0.803734	0.6	0.516	6.47508e-12	cox7b
cycsb	4.56509e-16	1.02923	0.472	0.344	1.02724e-11	cycsb
uqcrh	5.38099e-16	0.958442	0.502	0.401	1.21083e-11	uqcrh
rpl41	9.03146e-16	0.732409	0.73	0.717	2.03226e-11	rpl4
atp5g1	2.25282e-15	0.969197	0.479	0.366	5.06929e-11	atp5g1
cox7c	2.43691e-15	0.875573	0.612	0.578	5.48354e-11	cox7c
zgc:86599	3.08888e-15	0.835859	0.595	0.54	6.9506e-11	zgc:86599
aldh6a11	3.8059e-15	0.839581	0.309	0.175	8.56404e-11	aldh6a1
si:ch1073-325m22.2	4.4119e-15	0.970837	0.463	0.364	9.92765e-11	si:ch1073-325m22.2
gapdh1	8.29013e-15	0.527402	0.305	0.153	1.86545e-10	gapdh
cox5ab	1.17857e-14	1.17359	0.435	0.329	2.65203e-10	cox5ab
rpl61	1.37317e-14	0.545795	0.758	0.735	3.0899e-10	rpl6
slc25a3b	1.44681e-14	0.740498	0.633	0.6	3.2556e-10	slc25a3b
cyc1	1.48104e-14	0.953067	0.36	0.234	3.33264e-10	cyc1
bhlhe402	3.85898e-14	0.71843	0.426	0.282	8.68349e-10	bhlhe40
atp5j2	6.7471e-14	0.920877	0.523	0.465	1.51823e-09	atp5j2
atp5f1	9.94688e-14	0.86858	0.535	0.483	2.23825e-09	atp5f1
cd74a1	1.09121e-13	0.399646	0.956	0.834	2.45545e-09	cd74a
appa1	2.36475e-13	0.802807	0.323	0.196	5.32116e-09	appa
hdlbpa1	2.49796e-13	0.900049	0.456	0.356	5.62091e-09	hdlbpa
eef1b21	3.66786e-13	0.497409	0.788	0.727	8.25343e-09	eef1b2
pfkfb4b1	1.17884e-12	1.58371	0.472	0.379	2.65264e-08	pfkfb4b
cox6a2.11	1.44205e-12	0.989059	0.423	0.309	3.24489e-08	cox6a2.1
caprin1b1	1.77963e-12	1.16776	0.449	0.352	4.00453e-08	caprin1b
gabarapa.1	1.90363e-12	0.985299	0.565	0.476	4.28354e-08	gabarapa.1
vdac3	1.94091e-12	0.884278	0.391	0.281	4.36745e-08	vdac3
eef1db1	4.12479e-12	0.589725	0.705	0.647	9.2816e-08	eef1db
slc7a8a1	5.49655e-12	1.17664	0.391	0.293	1.23683e-07	slc7a8a
eef2b1	6.22474e-12	0.592226	0.733	0.723	1.40069e-07	eef2b
ndufa6	7.29987e-12	0.870145	0.451	0.373	1.64262e-07	ndufa6
zgc:193541	2.91093e-11	0.686187	0.553	0.499	6.55017e-07	zgc:193541
cox5aa1	2.9554e-11	0.716253	0.558	0.526	6.65025e-07	cox5aa
eif4ebp3l1	3.0579e-11	1.38671	0.309	0.204	6.88088e-07	eif4ebp3l
epdl1	3.0911e-11	0.818652	0.463	0.353	6.9556e-07	epdl1
tob1a1	4.47971e-11	1.04594	0.398	0.299	1.00802e-06	tob1a
rpl32	6.10389e-11	0.415307	0.898	0.869	1.3735e-06	rpl3
suclg11	6.40442e-11	0.665575	0.481	0.371	1.44112e-06	suclg1
uqcr10	1.29657e-10	0.850437	0.453	0.39	2.91755e-06	uqcr10
sod2	2.2394e-10	0.829826	0.27	0.168	5.03911e-06	sod2
pttg1ipb1	2.88084e-10	0.696122	0.281	0.172	6.48246e-06	pttg1ipb
cox8a1	4.83848e-10	0.645608	0.6	0.571	1.08876e-05	cox8a
glud1b	5.24492e-10	0.84209	0.298	0.199	1.18021e-05	glud1b
zgc:114188	6.54558e-10	0.377026	0.921	0.891	1.47289e-05	zgc:114188
rpl5a1	1.05214e-09	0.402965	0.774	0.764	2.36753e-05	rpl5a
rpl91	1.14987e-09	0.310688	0.928	0.906	2.58743e-05	rpl9
rpl5b1	1.24734e-09	0.522196	0.688	0.675	2.80677e-05	rpl5b
rpl341	1.39085e-09	0.271236	0.928	0.902	3.12969e-05	rpl34
rpl7a1	1.74496e-09	0.307635	0.93	0.91	3.9265e-05	rpl7a
ndufb7	2.20698e-09	0.848824	0.421	0.348	4.96615e-05	ndufb7
mhc1uba1	2.21185e-09	0.264553	0.433	0.299	4.97711e-05	mhc1uba
id2a1	3.67436e-09	0.726684	0.44	0.337	8.26804e-05	id2a
ndufab1b	5.77673e-09	0.740818	0.281	0.186	0.000129988	ndufab1b
ndufa5	7.21092e-09	0.79723	0.419	0.353	0.00016226	ndufa5
atp5c1	8.89312e-09	0.895272	0.384	0.314	0.000200113	atp5c1
si:dkeyp-80c12.10	9.92284e-09	0.938523	0.43	0.381	0.000223284	si:dkeyp-80c12.10
atp5d	1.20139e-08	0.862872	0.435	0.39	0.000270337	atp5d
vdac11	1.20557e-08	0.750738	0.265	0.172	0.000271277	vdac1
pfn21	1.42262e-08	0.476706	0.484	0.379	0.000320118	pfn2
idh2	1.6308e-08	0.836797	0.435	0.364	0.000366962	idh2
LOC1018837081	3.19852e-08	0.541511	0.535	0.438	0.000719732	LOC101883708
lpin11	3.90534e-08	1.05729	0.279	0.187	0.00087878	lpin1
rpl171	5.37093e-08	0.254279	0.93	0.917	0.00120857	rpl17
ndufb8	5.49825e-08	0.784926	0.433	0.389	0.00123722	ndufb8
fabp11a1	8.09606e-08	0.536996	0.614	0.552	0.00182178	fabp11a
ndufs5	1.6402e-07	0.715934	0.395	0.326	0.00369077	ndufs5
etfb	1.71405e-07	0.673046	0.274	0.193	0.00385695	etfb
dbn11	1.86333e-07	0.602713	0.286	0.2	0.00419287	dbn1
si:dkey-28b4.7	2.07965e-07	0.588149	0.26	0.172	0.00467963	si:dkey-28b4.7
zgc:110339	2.27767e-07	0.661236	0.302	0.216	0.0051252	zgc:110339
ndufb3	2.77381e-07	0.667072	0.444	0.382	0.00624163	ndufb3
ndufb2	4.35134e-07	0.778344	0.367	0.3	0.00979138	ndufb2
cebpd2	6.67608e-07	0.65467	0.33	0.24	0.0150225	cebpd
si:ch1073-443f11.21	9.09886e-07	0.541874	0.281	0.193	0.0204743	si:ch1073-443f11.2
nfil3-61	9.51196e-07	0.493469	0.274	0.184	0.0214038	nfil3-6
ybx11	1.03979e-06	0.433751	0.735	0.779	0.0233974	ybx1
zgc:1627301	1.09458e-06	0.306868	0.781	0.683	0.0246303	zgc:162730
cirbpb2	1.89812e-06	0.285811	0.802	0.809	0.0427115	cirbpb
uqcrfs1	4.33349e-06	0.711027	0.319	0.254	0.0975123	uqcrfs1
sec61a1	4.65437e-06	0.71708	0.358	0.293	0.104733	sec61a1
dbi1	5.1029e-06	0.901581	0.421	0.378	0.114826	dbi
pdk2b1	6.13373e-06	0.606218	0.374	0.307	0.138021	pdk2b
tob1b2	1.00452e-05	0.656375	0.319	0.254	0.226038	tob1b
ndufb10	1.16916e-05	0.62859	0.34	0.287	0.263085	ndufb10
ndufa11	1.24756e-05	0.675466	0.321	0.259	0.280725	ndufa11
cxcl201	1.48009e-05	0.415911	0.333	0.249	0.33305	cxcl20
ivns1abpb1	1.58838e-05	0.595527	0.279	0.208	0.357418	ivns1abpb
junba1	2.25535e-05	0.581364	0.307	0.237	0.507499	junba
ndufs3	2.36301e-05	0.563565	0.27	0.201	0.531724	ndufs3
fosab1	3.28805e-05	0.541558	0.34	0.266	0.739878	fosab
pabpc1a1	6.521e-05	0.314813	0.709	0.755	1	pabpc1a
ndufs6	9.22444e-05	0.608642	0.288	0.23	1	ndufs6
ndufa2	9.94167e-05	0.6347	0.337	0.288	1	ndufa2
pcbp2	0.000104802	0.495402	0.305	0.241	1	pcbp2
ubc1	0.000110395	0.324574	0.826	0.799	1	ubc
higd1a	0.000132934	0.459335	0.277	0.207	1	higd1a
mycbp	0.000138791	0.607911	0.312	0.257	1	mycbp
nipsnap2	0.000156002	0.417632	0.258	0.197	1	nipsnap2
calm2b	0.000185541	0.668856	0.426	0.395	1	calm2b
acadm	0.000201922	0.604682	0.295	0.246	1	acadm
lxn1	0.000222583	0.686245	0.3	0.246	1	lxn
cox7a2a	0.000279526	0.558446	0.381	0.354	1	cox7a2a
eef1da2	0.000361558	0.438827	0.516	0.529	1	eef1da
ctsz1	0.000373512	0.367423	0.577	0.533	1	ctsz
etnk11	0.000377587	0.650405	0.43	0.406	1	etnk1
sod1	0.000499491	0.572112	0.463	0.468	1	sod1
oaz1a	0.000709097	0.475773	0.493	0.481	1	oaz1a
sdhb	0.000961125	0.653769	0.326	0.295	1	sdhb
fkbp52	0.00106524	0.302492	0.447	0.405	1	fkbp5
minos1	0.00117561	0.52973	0.263	0.215	1	minos1
ndufa3	0.00144626	0.579141	0.326	0.298	1	ndufa3
si:ch211-235e9.6	0.00172457	0.522805	0.3	0.259	1	si:ch211-235e9.6
tegt1	0.002054	0.375088	0.528	0.526	1	tegt
ccr9a	0.00217843	0.361425	0.263	0.21	1	ccr9a
mt-rnr11	0.0023782	0.710265	0.877	0.922	1	mt-rnr1
tomm5	0.00262051	0.536089	0.342	0.315	1	tomm5
ndufb11	0.00327038	0.551755	0.342	0.321	1	ndufb11
mt-rnr22	0.00355691	0.850582	0.998	0.993	1	mt-rnr2
prdx11	0.00386196	0.443797	0.365	0.319	1	prdx1
txn1	0.0045446	1.513	0.379	0.376	1	txn
pno1	0.00456611	0.513617	0.277	0.244	1	pno1
si:ch211-79k12.11	0.00494465	0.407595	0.435	0.417	1	si:ch211-79k12.1
laptm4a	0.00511237	0.559377	0.314	0.284	1	laptm4a
slc3a2b1	0.00558274	0.832666	0.27	0.24	1	slc3a2b
p4hb.11	0.00611942	0.555997	0.363	0.336	1	p4hb.1
myh9a1	0.00772852	0.269879	0.26	0.212	1	myh9a
ndufc21	0.00843823	0.587951	0.328	0.31	1	ndufc2
ndufb6	0.00903881	0.544331	0.277	0.247	1	ndufb6

## Sheet: neurons
	p_val	avg_log2FC	pct.1	pct.2	p_val_adj	gene
stmn1a	9.9953e-248	2.8119	0.452	0.019	2.24914e-243	stmn1a
mki67	1.61927e-225	1.99164	0.35	0.007	3.64368e-221	mki67
rrm2	4.84936e-191	2.23803	0.376	0.019	1.0912e-186	rrm2
top2a	4.92356e-179	1.64711	0.272	0.005	1.1079e-174	top2a
ube2c	6.44588e-177	1.79817	0.305	0.01	1.45045e-172	ube2c
nusap1	1.71688e-166	1.4336	0.258	0.005	3.86332e-162	nusap1
incenp	2.27887e-155	1.43777	0.277	0.01	5.12791e-151	incenp
smc4	7.34449e-142	1.05171	0.261	0.01	1.65266e-137	smc4
cks1b	5.47151e-140	1.14059	0.308	0.019	1.2312e-135	cks1b
hmgb2b	6.59182e-138	2.64692	0.775	0.298	1.48329e-133	hmgb2b
hmgn21	4.90933e-136	2.77793	0.948	0.655	1.1047e-131	hmgn2
clspn	1.09192e-126	1.06671	0.253	0.013	2.45704e-122	clspn
pcna	3.24027e-123	2.42803	0.522	0.105	7.29126e-119	pcna
tubb2b	2.72581e-113	2.45188	0.637	0.196	6.13361e-109	tubb2b
mibp	1.30317e-107	0.95156	0.256	0.018	2.93239e-103	mibp
rrm1	1.1994e-103	1.01662	0.253	0.019	2.69889e-99	rrm1
h2afvb	7.47518e-100	2.23163	0.705	0.299	1.68207e-95	h2afvb
hmgb2a	4.64279e-99	2.24998	0.859	0.598	1.04472e-94	hmgb2a
kiaa0101	2.44569e-93	1.73672	0.379	0.064	5.50329e-89	kiaa0101
si:ch211-288g17.3	6.4465e-81	1.77072	0.522	0.158	1.45059e-76	si:ch211-288g17.3
hmga1a1	2.5544e-80	1.96433	0.692	0.332	5.74791e-76	hmga1a
rpa2	8.55496e-80	1.11831	0.332	0.056	1.92504e-75	rpa2
si:ch211-222l21.11	7.47374e-79	1.80989	0.76	0.366	1.68174e-74	si:ch211-222l21.1
ptmab1	5.94105e-78	1.56638	0.88	0.698	1.33686e-73	ptmab
si:ch73-281n10.2	3.52555e-77	1.2462	0.329	0.058	7.93319e-73	si:ch73-281n10.2
rpa3	8.9692e-71	1.21987	0.339	0.068	2.01825e-66	rpa3
h3f3a1	1.01663e-66	1.79805	0.744	0.455	2.28762e-62	h3f3a
tuba8l4	2.14871e-65	1.51799	0.817	0.584	4.83503e-61	tuba8l4
h2afx	5.68523e-65	1.11457	0.253	0.038	1.27929e-60	h2afx
stra13	4.78495e-62	0.917586	0.287	0.054	1.07671e-57	stra13
sumo3b	7.03113e-62	1.1895	0.326	0.071	1.58214e-57	sumo3b
mcm7	2.71603e-57	1.19999	0.311	0.068	6.11161e-53	mcm7
hmgb1b	2.73766e-52	1.32735	0.298	0.068	6.16028e-48	hmgb1b
snrpg	1.54966e-47	1.28229	0.439	0.159	3.48705e-43	snrpg
si:ch73-1a9.31	2.71711e-46	1.56516	0.734	0.517	6.11405e-42	si:ch73-1a9.3
bub3	1.23273e-44	0.822879	0.287	0.072	2.7739e-40	bub3
snrpd1	3.01821e-41	1.29457	0.46	0.195	6.79157e-37	snrpd1
dek	5.57635e-40	0.778773	0.303	0.086	1.25479e-35	dek
tuba8l1	7.905e-40	1.717	0.53	0.268	1.77878e-35	tuba8l
rbbp4	8.51163e-40	1.03039	0.3	0.087	1.91529e-35	rbbp4
lmnb2	2.89493e-39	0.889087	0.345	0.11	6.51417e-35	lmnb2
nucks1a	1.31006e-37	1.20013	0.54	0.28	2.9479e-33	nucks1a
nutf2l	5.11478e-36	0.932133	0.326	0.108	1.15093e-31	nutf2l
cirbpa	1.46719e-35	1.08811	0.749	0.599	3.30147e-31	cirbpa
snrpe	3.65184e-35	1.11369	0.457	0.203	8.21737e-31	snrpe
h2afva	4.33471e-34	1.17646	0.386	0.156	9.75395e-30	h2afva
arpp19b	1.40608e-33	0.83604	0.305	0.1	3.16397e-29	arpp19b
anp32b	1.08589e-31	1.19547	0.46	0.226	2.44346e-27	anp32b
ahcy	2.93124e-31	0.956835	0.402	0.177	6.59588e-27	ahcy
lbr1	2.9906e-31	0.717917	0.316	0.109	6.72944e-27	lbr
grn12	5.72193e-31	0.735227	0.974	0.88	1.28755e-26	grn1
lsm7	1.36713e-29	1.04163	0.413	0.19	3.07631e-25	lsm7
ppiab1	3.43456e-29	0.63001	0.893	0.773	7.72844e-25	ppiab
snrpf.1	4.03698e-28	1.04189	0.42	0.202	9.08402e-24	snrpf.1
lin52	4.98969e-28	0.540691	0.269	0.089	1.12278e-23	lin52
seta	6.6392e-28	1.11038	0.546	0.34	1.49395e-23	seta
rps201	1.45824e-27	0.495156	0.987	0.956	3.28133e-23	rps20
tubb4b1	3.22187e-27	1.10939	0.713	0.563	7.24985e-23	tubb4b
snrpb	1.05128e-26	0.944378	0.504	0.28	2.36558e-22	snrpb
sub1a1	1.58794e-26	1.02456	0.478	0.263	3.57318e-22	sub1a
ranbp1	2.13537e-26	1.10502	0.509	0.296	4.805e-22	ranbp1
tma7	1.0628e-25	0.896572	0.621	0.438	2.39151e-21	tma7
ddx39ab	9.7162e-25	0.702849	0.279	0.105	2.18634e-20	ddx39ab
rpl22l11	2.42107e-24	1.16215	0.653	0.48	5.4479e-20	rpl22l1
rplp11	5.75904e-24	0.474563	0.982	0.957	1.2959e-19	rplp1
cbx5	6.31768e-24	0.837791	0.368	0.166	1.4216e-19	cbx5
cd74a2	3.64321e-23	0.703877	0.966	0.834	8.19795e-19	cd74a
smc1al	7.91926e-23	0.878736	0.428	0.229	1.78199e-18	smc1al
calm2b1	1.58122e-21	0.948807	0.554	0.381	3.55807e-17	calm2b
hnrnpa0b	2.23063e-21	0.994066	0.449	0.258	5.01937e-17	hnrnpa0b
atp5g11	2.40058e-21	0.872369	0.551	0.359	5.40178e-17	atp5g1
ran2	5.49841e-21	0.834149	0.731	0.597	1.23725e-16	ran
si:busm1-266f07.21	4.11118e-20	0.601383	0.888	0.692	9.25097e-16	si:busm1-266f07.2
ptges3b	5.95703e-20	0.806226	0.305	0.136	1.34045e-15	ptges3b
lgals3bpb1	7.25276e-20	0.893611	0.582	0.35	1.63202e-15	lgals3bpb
rps15a1	2.0909e-19	0.449598	0.977	0.909	4.70495e-15	rps15a
rps4x1	2.25771e-19	0.517451	0.945	0.873	5.08029e-15	rps4x
calm3b	2.28025e-19	0.882821	0.525	0.346	5.13102e-15	calm3b
lgals9l11	5.96231e-19	0.770518	0.632	0.424	1.34164e-14	lgals9l1
cnbpa	3.89793e-18	0.787316	0.42	0.232	8.77111e-14	cnbpa
grn23	4.49885e-18	1.02445	0.872	0.735	1.01233e-13	grn2
si:ch211-51e12.7	5.33639e-18	0.457249	0.295	0.129	1.20079e-13	si:ch211-51e12.7
cdc25b1	6.57189e-18	0.885966	0.457	0.277	1.47881e-13	cdc25b
rps8a1	7.07881e-18	0.432408	0.971	0.909	1.59287e-13	rps8a
eef1b22	1.15233e-17	0.649345	0.825	0.724	2.59298e-13	eef1b2
ckbb	1.57425e-17	0.902658	0.324	0.164	3.54237e-13	ckbb
rpl81	1.58714e-17	0.458802	0.958	0.91	3.57138e-13	rpl8
nap1l11	2.39991e-17	0.856079	0.46	0.273	5.40028e-13	nap1l1
rplp2l1	2.58012e-17	0.36257	0.992	0.946	5.80578e-13	rplp2l
taf15	3.31874e-17	0.724908	0.368	0.194	7.46783e-13	taf15
npm31	4.93234e-17	0.700745	0.334	0.167	1.10987e-12	npm3
srsf3b1	5.87371e-17	0.627734	0.444	0.26	1.3217e-12	srsf3b
mfap41	7.3074e-17	0.580027	0.674	0.46	1.64431e-12	mfap4
zgc:1141881	7.98713e-17	0.441211	0.963	0.887	1.79726e-12	zgc:114188
dpy30	1.45575e-16	0.709488	0.363	0.198	3.27572e-12	dpy30
rpl291	3.0457e-16	0.372316	0.966	0.901	6.85344e-12	rpl29
sf3b5	3.42205e-16	0.629426	0.285	0.132	7.7003e-12	sf3b5
rps71	4.56301e-16	0.449856	0.953	0.897	1.02677e-11	rps7
ilf2	4.87921e-16	0.647547	0.358	0.191	1.09792e-11	ilf2
lygl11	8.61851e-16	0.547517	0.783	0.602	1.93934e-11	lygl1
rpl181	1.23262e-15	0.437798	0.977	0.922	2.77364e-11	rpl18
hnrnpaba1	4.15241e-15	0.75565	0.616	0.498	9.34375e-11	hnrnpaba
rpl35a1	8.23036e-15	0.366573	0.971	0.904	1.852e-10	rpl35a
hnrnpa0l1	8.83675e-15	0.735171	0.653	0.527	1.98845e-10	hnrnpa0l
banf1	9.18647e-15	0.765426	0.48	0.335	2.06714e-10	banf1
zgc:564931	1.04973e-14	0.518891	0.744	0.66	2.36209e-10	zgc:56493
faua1	1.12225e-14	0.415242	0.95	0.901	2.52529e-10	faua
pycard1	1.21703e-14	0.699822	0.577	0.404	2.73857e-10	pycard
nedd8	1.28158e-14	0.600684	0.305	0.157	2.88382e-10	nedd8
cox6a11	1.45211e-14	0.657712	0.619	0.483	3.26754e-10	cox6a1
sap18.1	1.61584e-14	0.716196	0.295	0.148	3.63596e-10	sap18.1
cd74b1	2.1714e-14	0.47393	0.914	0.761	4.88609e-10	cd74b
cbx3a	4.57564e-14	0.793092	0.488	0.346	1.02961e-09	cbx3a
sumo3a1	7.53037e-14	0.760425	0.475	0.324	1.69448e-09	sumo3a
LOC1039115401	9.11697e-14	0.570013	0.765	0.572	2.0515e-09	LOC103911540
rpl261	9.86453e-14	0.322415	0.982	0.933	2.21972e-09	rpl26
anp32e	1.01364e-13	0.456666	0.269	0.128	2.28089e-09	anp32e
si:zfos-2330d3.31	1.13195e-13	0.529642	0.556	0.361	2.54712e-09	si:zfos-2330d3.3
hmgn7.1	2.06165e-13	0.84898	0.431	0.287	4.63912e-09	hmgn7.1
hnrnpabb1	2.09915e-13	0.792989	0.52	0.371	4.7235e-09	hnrnpabb
s100a10b1	2.26768e-13	0.969636	0.517	0.374	5.10273e-09	s100a10b
grna1	2.3806e-13	0.434641	0.781	0.559	5.35682e-09	grna
cfl11	2.39333e-13	0.407368	0.875	0.826	5.38548e-09	cfl1
rplp02	3.59285e-13	0.442037	0.974	0.919	8.08462e-09	rplp0
psma31	3.82796e-13	0.701932	0.486	0.335	8.61368e-09	psma3
hdac1	5.57049e-13	0.656235	0.402	0.25	1.25347e-08	hdac1
LOC1104399151	5.61116e-13	0.28073	0.457	0.278	1.26262e-08	LOC110439915
ms4a17a.101	9.6279e-13	0.480382	0.632	0.419	2.16647e-08	ms4a17a.10
rpl71	1.26316e-12	0.418267	0.919	0.887	2.84235e-08	rpl7
atp5b1	1.29804e-12	0.434712	0.671	0.525	2.92085e-08	atp5b
rps91	1.35445e-12	0.359953	0.961	0.92	3.04779e-08	rps9
rps26l1	1.43999e-12	0.329916	0.963	0.9	3.24026e-08	rps26l
ddost	1.58536e-12	0.556079	0.321	0.177	3.56737e-08	ddost
atp5l1	1.8889e-12	0.457843	0.721	0.626	4.25041e-08	atp5l
ctss2.21	1.94127e-12	0.491894	0.747	0.556	4.36824e-08	ctss2.2
rpl172	2.2836e-12	0.367216	0.963	0.914	5.13856e-08	rpl17
rpl10.21	2.37374e-12	0.512961	0.76	0.634	5.3414e-08	rpl10.2
rpl18a1	3.37156e-12	0.361038	0.937	0.898	7.58669e-08	rpl18a
lsm3	3.40356e-12	0.473538	0.285	0.148	7.65868e-08	lsm3
rps51	4.01278e-12	0.364826	0.93	0.91	9.02956e-08	rps5
rpl371	4.5943e-12	0.255457	0.966	0.935	1.03381e-07	rpl37
rps191	4.77882e-12	0.303738	0.969	0.938	1.07533e-07	rps19
psmb11	4.82928e-12	0.630517	0.504	0.357	1.08668e-07	psmb1
rpl33	6.17979e-12	0.406265	0.911	0.868	1.39058e-07	rpl3
zgc:1717721	6.73786e-12	0.297891	0.987	0.944	1.51615e-07	zgc:171772
rpl7a2	7.74058e-12	0.354348	0.963	0.907	1.74179e-07	rpl7a
rpl111	1.03444e-11	0.336364	0.971	0.927	2.32769e-07	rpl11
ctsba1	1.29751e-11	0.340398	0.901	0.763	2.91965e-07	ctsba
ccr9a1	1.56589e-11	0.817022	0.342	0.202	3.52357e-07	ccr9a
aif1l	1.84498e-11	0.541261	0.287	0.155	4.15158e-07	aif1l
snrpc	1.93623e-11	0.428772	0.287	0.155	4.3569e-07	snrpc
rpl231	2.26975e-11	0.307471	0.99	0.942	5.10738e-07	rpl23
anp32a1	2.62259e-11	0.567233	0.493	0.359	5.90136e-07	anp32a
hp1bp3	3.24171e-11	0.605512	0.324	0.186	7.2945e-07	hp1bp3
ybx12	4.64885e-11	0.438037	0.833	0.768	1.04608e-06	ybx1
srsf1a	5.17646e-11	0.384123	0.285	0.153	1.16481e-06	srsf1a
dynll1	7.75482e-11	0.62423	0.491	0.355	1.74499e-06	dynll1
rpsa1	8.96151e-11	0.310588	0.961	0.936	2.01652e-06	rpsa
rbm8a	1.72704e-10	0.658529	0.446	0.322	3.88618e-06	rbm8a
cct4	1.72782e-10	0.633281	0.439	0.304	3.88793e-06	cct4
nucks1b	2.76133e-10	0.619681	0.329	0.202	6.21353e-06	nucks1b
rad21a1	3.76091e-10	0.546207	0.355	0.226	8.4628e-06	rad21a
cct3	4.80011e-10	0.63138	0.386	0.251	1.08012e-05	cct3
snrpd3l	7.1968e-10	0.473999	0.313	0.183	1.61942e-05	snrpd3l
fbl	7.34673e-10	0.652602	0.279	0.162	1.65316e-05	fbl
rps231	9.12056e-10	0.273618	0.984	0.92	2.05231e-05	rps23
sf3b2	1.16849e-09	0.525834	0.316	0.188	2.62934e-05	sf3b2
rpl241	1.35353e-09	0.263169	0.979	0.943	3.0457e-05	rpl24
gnb2l11	1.91516e-09	0.381121	0.909	0.879	4.3095e-05	gnb2l1
txn.11	1.93901e-09	0.672782	0.285	0.168	4.36316e-05	txn.1
psma6a	1.99645e-09	0.478241	0.272	0.155	4.49241e-05	psma6a
gpx4b	2.05127e-09	0.521294	0.483	0.352	4.61576e-05	gpx4b
rpl131	2.1345e-09	0.342434	0.977	0.938	4.80305e-05	rpl13
fb06f03.21	2.14791e-09	0.878387	0.431	0.313	4.83323e-05	fb06f03.2
smarce1	2.21612e-09	0.497389	0.324	0.198	4.98671e-05	smarce1
smx5.3	2.52107e-09	0.548262	0.266	0.152	5.67291e-05	smx5.3
rbm4.3	2.68382e-09	0.518933	0.431	0.298	6.03914e-05	rbm4.3
rpl23a1	2.75323e-09	0.319483	0.916	0.835	6.19533e-05	rpl23a
atp5j21	3.49146e-09	0.506759	0.572	0.46	7.85648e-05	atp5j2
lgals2a1	5.08256e-09	0.316889	0.681	0.489	0.000114368	lgals2a
eny2	5.30513e-09	0.453911	0.258	0.149	0.000119376	eny2
psmb3	6.10485e-09	0.569098	0.444	0.313	0.000137371	psmb3
lsm61	8.58077e-09	0.469484	0.321	0.202	0.000193084	lsm6
idh21	1.31677e-08	0.491983	0.478	0.361	0.000296298	idh2
h1fx2	1.36993e-08	0.521924	0.676	0.559	0.000308262	h1fx
alcama1	1.50761e-08	0.83987	0.324	0.212	0.000339242	alcama
tpp11	1.62756e-08	0.294973	0.621	0.436	0.000366234	tpp1
sf3a2	1.78578e-08	0.429312	0.319	0.197	0.000401836	sf3a2
psma2	2.47631e-08	0.613727	0.363	0.25	0.00055722	psma2
setb1	3.01486e-08	0.536542	0.475	0.356	0.000678403	setb
prdx2	3.12213e-08	0.508555	0.608	0.518	0.000702541	prdx2
rpl281	3.3661e-08	0.286755	0.969	0.92	0.000757439	rpl28
prdx61	3.51649e-08	0.521974	0.46	0.329	0.000791281	prdx6
si:ch1073-429i10.31	4.26108e-08	0.607019	0.509	0.412	0.000958828	si:ch1073-429i10.3
sub1b.1	4.34551e-08	0.525464	0.277	0.169	0.000977826	sub1b.1
eef2b2	4.45213e-08	0.483665	0.778	0.718	0.00100182	eef2b
eif2s2	4.61398e-08	0.463505	0.48	0.349	0.00103824	eif2s2
rps241	4.70233e-08	0.25836	0.958	0.931	0.00105812	rps24
fabp11a2	5.24833e-08	0.74513	0.668	0.547	0.00118098	fabp11a
tcp1	5.77755e-08	0.598233	0.366	0.251	0.00130006	tcp1
rps111	6.06885e-08	0.28579	0.969	0.912	0.00136561	rps11
eif3ba	6.49147e-08	0.625851	0.405	0.296	0.00146071	eif3ba
rps141	8.06915e-08	0.251615	0.969	0.942	0.00181572	rps14
rps61	8.24872e-08	0.342915	0.883	0.846	0.00185613	rps6
zgc:1534091	9.56518e-08	0.798198	0.392	0.292	0.00215236	zgc:153409
si:ch211-194m7.41	9.64385e-08	0.256467	0.627	0.448	0.00217006	si:ch211-194m7.4
psmd14	1.09467e-07	0.482315	0.282	0.173	0.00246324	psmd14
prmt1	1.18138e-07	0.480142	0.285	0.176	0.00265833	prmt1
alyref	1.49348e-07	0.532331	0.402	0.292	0.00336062	alyref
cwc15	1.60512e-07	0.472085	0.332	0.218	0.00361185	cwc15
rpl151	2.01279e-07	0.277208	0.901	0.874	0.00452918	rpl15
psma1	2.06202e-07	0.392918	0.556	0.439	0.00463996	psma1
ndufb101	2.16008e-07	0.494959	0.397	0.282	0.00486062	ndufb10
si:dkey-27i16.21	2.44845e-07	0.497717	0.415	0.294	0.00550949	si:dkey-27i16.2
mibp2	2.79617e-07	0.472565	0.637	0.554	0.00629195	mibp2
npm1a.1	2.93326e-07	0.669951	0.269	0.172	0.00660041	npm1a.1
zgc:1937251	2.99134e-07	0.682715	0.319	0.214	0.00673112	zgc:193725
prkcsh	3.06079e-07	0.305731	0.292	0.183	0.0068874	prkcsh
rpl5a2	3.15601e-07	0.375087	0.789	0.763	0.00710165	rpl5a
polr2d	3.62013e-07	0.408644	0.292	0.187	0.00814602	polr2d
hspe1	3.7108e-07	0.541482	0.287	0.188	0.00835003	hspe1
eif2s1b	3.96008e-07	0.483686	0.397	0.288	0.00891098	eif2s1b
atp5c11	4.08812e-07	0.494701	0.426	0.311	0.00919909	atp5c1
rpl32.11	4.21955e-07	0.288484	0.872	0.803	0.00949482	rpl32.1
rpl271	4.61433e-07	0.27762	0.943	0.876	0.0103832	rpl27
rpl192	5.18979e-07	0.266399	0.958	0.911	0.0116781	rpl19
suclg12	5.25239e-07	0.46503	0.488	0.372	0.0118189	suclg1
rpl5b2	5.26605e-07	0.405794	0.739	0.67	0.0118497	rpl5b
cmklr11	5.26967e-07	0.251347	0.598	0.423	0.0118578	cmklr1
cct7	6.22402e-07	0.537989	0.347	0.24	0.0140053	cct7
h3f3c1	6.22958e-07	0.61764	0.345	0.234	0.0140178	h3f3c
psma81	6.59909e-07	0.510777	0.504	0.408	0.0148493	psma8
hnrnpa1b1	7.32952e-07	0.446771	0.384	0.28	0.0164929	hnrnpa1b
bcam1	8.98622e-07	0.623942	0.264	0.17	0.0202208	bcam
psme22	9.04872e-07	0.443497	0.556	0.449	0.0203614	psme2
cox7a2b1	9.11649e-07	0.416937	0.546	0.435	0.0205139	cox7a2b
pomp	9.53527e-07	0.476245	0.493	0.393	0.0214563	pomp
cox5ab1	9.96023e-07	0.408462	0.439	0.33	0.0224125	cox5ab
naga1	1.14594e-06	0.462469	0.52	0.41	0.025786	naga
scpep11	1.23211e-06	0.46088	0.567	0.46	0.0277249	scpep1
rpn1	1.62022e-06	0.396881	0.266	0.168	0.0364583	rpn1
atp5d1	1.66324e-06	0.439274	0.488	0.384	0.0374262	atp5d
LOC100535353	1.86933e-06	0.376219	0.298	0.195	0.0420636	LOC100535353
dnase1l4.21	2.12132e-06	0.356224	0.287	0.188	0.047734	dnase1l4.2
cox7b1	2.13351e-06	0.373865	0.598	0.517	0.0480083	cox7b
u2af1	2.15602e-06	0.438123	0.266	0.173	0.0485148	u2af1
eif5a2	2.37991e-06	0.494479	0.41	0.311	0.0535527	eif5a2
rpl92	2.50399e-06	0.264141	0.958	0.903	0.0563448	rpl9
denr	2.71726e-06	0.383463	0.282	0.187	0.0611438	denr
spi1a1	2.81632e-06	0.395654	0.423	0.304	0.0633729	spi1a
ubc2	2.89193e-06	0.30811	0.833	0.799	0.0650742	ubc
dnajc8	3.02503e-06	0.465047	0.256	0.163	0.0680692	dnajc8
h2afy21	3.40424e-06	0.37926	0.324	0.222	0.0766022	h2afy2
hsp90ab12	3.73996e-06	0.317856	0.935	0.921	0.0841566	hsp90ab1
atp6v0ca1	4.71567e-06	0.297892	0.783	0.694	0.106112	atp6v0ca
cox7a2a1	4.88726e-06	0.498578	0.439	0.348	0.109973	cox7a2a
si:ch211-212k18.7.11	4.89718e-06	0.308735	0.692	0.561	0.110196	si:ch211-212k18.7.1
cfp1	5.29817e-06	0.31149	0.47	0.346	0.119219	cfp
psmb6	5.90074e-06	0.425145	0.337	0.236	0.132779	psmb6
hnrnpul1l	6.86445e-06	0.306614	0.326	0.222	0.154464	hnrnpul1l
LOC1039099731	7.66879e-06	0.535379	0.334	0.236	0.172563	LOC103909973
atp5g3a	7.89383e-06	0.467411	0.413	0.325	0.177627	atp5g3a
sftpbb1	8.40643e-06	0.380229	0.256	0.169	0.189161	sftpbb
syncrip2	8.68461e-06	0.372811	0.527	0.459	0.195421	syncrip
eif4a1a2	9.42696e-06	0.417378	0.444	0.341	0.212125	eif4a1a
psmb2	1.01097e-05	0.470153	0.454	0.36	0.227488	psmb2
mif	1.0603e-05	0.432769	0.371	0.279	0.238589	mif
zgc:865991	1.15437e-05	0.352671	0.611	0.539	0.259756	zgc:86599
atp5a11	1.36461e-05	0.339168	0.551	0.466	0.307065	atp5a1
zgc:66388	1.6158e-05	0.412089	0.266	0.179	0.363588	zgc:66388
drap1	1.76837e-05	0.338824	0.29	0.198	0.397918	drap1
si:busm1-48c11.31	1.79621e-05	0.430027	0.46	0.346	0.404183	si:busm1-48c11.3
ssr41	2.24852e-05	0.455449	0.457	0.365	0.505962	ssr4
psmc2	2.43932e-05	0.28985	0.253	0.167	0.548896	psmc2
stoml3b1	2.45599e-05	0.347594	0.3	0.207	0.552648	stoml3b
usp101	2.52667e-05	0.47142	0.303	0.212	0.568551	usp10
fcer1g1	2.55711e-05	0.322837	0.405	0.298	0.575401	fcer1g
sypl2b1	2.58873e-05	0.315538	0.274	0.183	0.582515	sypl2b
zgc:1935411	2.92682e-05	0.352134	0.569	0.498	0.658594	zgc:193541
cyba2	3.56911e-05	0.382068	0.525	0.424	0.803121	cyba
ncl1	3.6541e-05	0.437848	0.509	0.427	0.822245	ncl
si:ch211-117m20.51	3.90045e-05	0.285839	0.567	0.457	0.87768	si:ch211-117m20.5
psap1	4.73225e-05	0.299258	0.728	0.64	1	psap
psmb41	4.74231e-05	0.404405	0.42	0.334	1	psmb4
psmd7	4.84089e-05	0.429795	0.287	0.205	1	psmd7
h3f3d1	5.09322e-05	0.42059	0.632	0.606	1	h3f3d
eif4a3	5.14091e-05	0.360542	0.329	0.239	1	eif4a3
psmb121	5.23897e-05	0.37459	0.465	0.375	1	psmb12
kars	5.48185e-05	0.385464	0.342	0.25	1	kars
gm2a1	5.49268e-05	0.492037	0.439	0.351	1	gm2a
ostc	5.50345e-05	0.407856	0.272	0.188	1	ostc
cct51	5.71357e-05	0.526106	0.394	0.31	1	cct5
atp5f11	5.75317e-05	0.399824	0.554	0.481	1	atp5f1
nop10	6.07027e-05	0.45015	0.251	0.174	1	nop10
srsf2a2	6.83926e-05	0.258226	0.415	0.321	1	srsf2a
ndufab1b1	7.16295e-05	0.383086	0.269	0.189	1	ndufab1b
psmd1	7.93526e-05	0.351001	0.261	0.181	1	psmd1
dram1	9.12955e-05	0.390633	0.446	0.355	1	dram1
psmc5	0.00010883	0.340582	0.272	0.19	1	psmc5
cycsb1	0.000115955	0.261613	0.433	0.35	1	cycsb
sri2	0.000116494	0.350861	0.564	0.477	1	sri
rpl27a1	0.000124745	0.272853	0.684	0.634	1	rpl27a
zgc:1533171	0.000149669	0.279699	0.567	0.478	1	zgc:153317
zgc:1231071	0.000152663	0.318148	0.292	0.211	1	zgc:123107
LOC1018827811	0.000156103	0.251368	0.428	0.322	1	LOC101882781
csnk2b	0.000157778	0.263495	0.431	0.34	1	csnk2b
h3f3b.11	0.000158817	0.392642	0.493	0.435	1	h3f3b.1
fkbp21	0.000161693	0.341369	0.29	0.207	1	fkbp2
ndufs31	0.000168943	0.322777	0.285	0.201	1	ndufs3
ywhaqb1	0.000172498	0.350084	0.428	0.354	1	ywhaqb
eif3ja	0.00017915	0.254124	0.292	0.211	1	eif3ja
ms4a17a.62	0.000199164	0.312615	0.373	0.28	1	ms4a17a.6
uqcrh1	0.000214575	0.335928	0.491	0.404	1	uqcrh
lipf1	0.000229631	0.492978	0.342	0.27	1	lipf
zgc:927911	0.000235561	0.368822	0.347	0.265	1	zgc:92791
eef1g2	0.000247575	0.327702	0.828	0.79	1	eef1g
uqcr101	0.000250908	0.289213	0.48	0.388	1	uqcr10
si:ch211-217k17.111	0.000271818	0.285568	0.681	0.577	1	si:ch211-217k17.11
atpif1a1	0.000281895	0.320559	0.507	0.42	1	atpif1a
lmnb11	0.000301755	0.297251	0.274	0.195	1	lmnb1
ndufa61	0.000310579	0.2879	0.46	0.373	1	ndufa6
prdx41	0.000370568	0.335649	0.287	0.21	1	prdx4
sod11	0.000376695	0.361822	0.527	0.461	1	sod1
atp5j1	0.000392431	0.309261	0.554	0.478	1	atp5j
srsf111	0.000445196	0.268506	0.334	0.251	1	srsf11
psma4	0.000460454	0.425902	0.392	0.32	1	psma4
gbp11	0.00046077	0.327849	0.363	0.288	1	gbp1
anxa42	0.000529325	0.382469	0.488	0.416	1	anxa4
paox11	0.000546217	0.31987	0.339	0.26	1	paox1
bzw1a	0.000582237	0.28362	0.352	0.268	1	bzw1a
hspa8	0.00060125	0.272393	0.614	0.55	1	hspa8
fam53b	0.000612223	0.275966	0.269	0.197	1	fam53b
p4hb.12	0.000622361	0.292932	0.413	0.331	1	p4hb.1
atp5e1	0.000637449	0.298023	0.64	0.576	1	atp5e
pin1	0.000647758	0.403791	0.277	0.205	1	pin1
ddx39aa	0.000653238	0.306635	0.295	0.219	1	ddx39aa
si:ch211-102c2.41	0.000657183	0.294788	0.329	0.251	1	si:ch211-102c2.4
samsn1a2	0.000661019	0.324621	0.295	0.224	1	samsn1a
dram2b1	0.000683314	0.354209	0.287	0.218	1	dram2b
eif3s6ip2	0.000690305	0.409894	0.329	0.255	1	eif3s6ip
dynlrb11	0.000700977	0.319015	0.292	0.217	1	dynlrb1
si:ch211-243a20.41	0.000746127	0.302914	0.371	0.291	1	si:ch211-243a20.4
fundc2	0.000754919	0.303178	0.256	0.182	1	fundc2
psma6l1	0.000766514	0.381557	0.272	0.205	1	psma6l
fkbp3	0.000770527	0.333324	0.373	0.295	1	fkbp3
pfdn4	0.000848766	0.291303	0.292	0.222	1	pfdn4
atp6v1e1b1	0.000865928	0.292581	0.507	0.431	1	atp6v1e1b
ndufv3	0.000874226	0.273359	0.311	0.235	1	ndufv3
ndufab1a.1	0.000880909	0.313846	0.253	0.184	1	ndufab1a.1
ndufv2	0.000909086	0.291421	0.266	0.193	1	ndufv2
hnrnpk	0.000928587	0.278123	0.326	0.25	1	hnrnpk
cyc11	0.000937887	0.250684	0.319	0.241	1	cyc1
shfm1	0.000960695	0.337324	0.431	0.353	1	shfm1
ndufb31	0.00107872	0.324747	0.457	0.381	1	ndufb3
tbca	0.0011081	0.344269	0.371	0.303	1	tbca
psma6b	0.00115046	0.347821	0.251	0.185	1	psma6b
si:ch211-235e9.61	0.00127514	0.285795	0.332	0.256	1	si:ch211-235e9.6
got2b	0.00128545	0.264659	0.251	0.181	1	got2b
mrpl34	0.00153939	0.316212	0.264	0.196	1	mrpl34
bcas2	0.00153955	0.323486	0.295	0.222	1	bcas2
ctsz2	0.00181507	0.372686	0.606	0.531	1	ctsz
ndufs21	0.00187758	0.270955	0.298	0.227	1	ndufs2
dad1	0.00188136	0.395307	0.46	0.387	1	dad1
uqcrfs11	0.00197403	0.265873	0.324	0.255	1	uqcrfs1
ndufs51	0.00210019	0.328936	0.397	0.326	1	ndufs5
atp6v1g1.11	0.00257461	0.330361	0.446	0.38	1	atp6v1g1.1
ndufc22	0.00268251	0.257614	0.381	0.304	1	ndufc2
khdrbs1a1	0.00278025	0.288904	0.642	0.629	1	khdrbs1a
zgc:91910	0.003025	0.360833	0.352	0.289	1	zgc:91910
eif3ha2	0.00304986	0.323197	0.381	0.316	1	eif3ha
ube2l3a.1	0.00319288	0.289945	0.319	0.254	1	ube2l3a.1
ndufa21	0.00322213	0.307003	0.352	0.287	1	ndufa2
epdl11	0.00340302	0.281896	0.423	0.359	1	epdl1
tspan36.11	0.00365943	0.413128	0.366	0.304	1	tspan36.1
minos11	0.00367924	0.283243	0.277	0.214	1	minos1
fabp7b1	0.00369058	0.378357	0.285	0.227	1	fabp7b
psmb8a1	0.00398276	0.263916	0.535	0.491	1	psmb8a
ndufs8a	0.00401485	0.289709	0.272	0.208	1	ndufs8a
si:busm1-194e12.121	0.00426889	0.313133	0.493	0.415	1	si:busm1-194e12.12
rbx1	0.00515114	0.299834	0.475	0.425	1	rbx1
ndufa111	0.00566798	0.279892	0.326	0.26	1	ndufa11
atf4a	0.00584437	0.264139	0.457	0.395	1	atf4a
ube2ia	0.00619376	0.268671	0.287	0.228	1	ube2ia
LOC1005377081	0.00674646	0.289604	0.334	0.271	1	LOC100537708
chd4b.11	0.00815387	0.358025	0.264	0.208	1	chd4b.1
ndufb61	0.00828121	0.338603	0.305	0.244	1	ndufb6
ndufb111	0.00957657	0.279054	0.376	0.318	1	ndufb11

## Sheet: erythrocytes
	p_val	avg_log2FC	pct.1	pct.2	p_val_adj	gene
ba1l	1.89037e-241	6.98599	0.985	0.045	4.25372e-237	ba1l
hbba2	2.00649e-231	4.63496	0.597	0.012	4.515e-227	hbba2
cahz	3.35198e-222	3.15841	0.478	0.007	7.54262e-218	cahz
epb41b	1.5909e-203	2.43999	0.313	0.002	3.57984e-199	epb41b
si:ch211-5k11.8	7.53838e-192	6.95051	0.955	0.057	1.69629e-187	si:ch211-5k11.8
slc4a1a	2.676e-187	1.96638	0.284	0.001	6.02153e-183	slc4a1a
nt5c2l1	2.47566e-171	2.2696	0.299	0.002	5.57074e-167	nt5c2l1
si:dkey-25o16.2	9.48195e-171	3.20966	0.478	0.011	2.13363e-166	si:dkey-25o16.2
hbaa2	1.20709e-163	4.19516	0.418	0.008	2.71619e-159	hbaa2
ba1	1.50361e-111	8.22477	0.985	0.131	3.38343e-107	ba1
hbaa1	9.50668e-103	8.36269	1	0.151	2.13919e-98	hbaa1
wu:fj58g06.1	5.18125e-78	1.92346	0.254	0.007	1.16588e-73	wu:fj58g06.1
mibp1	3.61884e-70	3.73617	0.463	0.034	8.14312e-66	mibp
gp1bb	3.47155e-58	1.89376	0.254	0.011	7.81168e-54	gp1bb
si:dkey-16p21.8	2.70231e-39	2.02478	0.284	0.023	6.08074e-35	si:dkey-16p21.8
creg1	4.15709e-30	4.54515	0.687	0.219	9.35427e-26	creg1
rplp03	2.67595e-10	1.17193	1	0.923	6.02142e-06	rplp0
gstm.1	3.1572e-10	2.35453	0.388	0.142	7.10433e-06	gstm.1
fth1a2	2.90499e-07	1.42133	0.731	0.631	0.00653682	fth1a
tspo1	1.08812e-06	1.66341	0.418	0.216	0.024485	tspo
blvrb1	5.72606e-05	1.05095	0.448	0.274	1	blvrb
grn25	0.00203079	1.31231	0.776	0.748	1	grn2
rpl112	0.00214295	0.41162	0.955	0.931	1	rpl11
rpsa2	0.00376505	0.632962	0.97	0.938	1	rpsa
ak12	0.00850453	1.11387	0.373	0.276	1	ak1

## Sheet:  kidney mucin-secreting cells
	p_val	avg_log2FC	pct.1	pct.2	p_val_adj	gene
si:dkey-203a12.8	0	6.87659	0.83	0.007	0	si:dkey-203a12.8
si:dkey-203a12.4	0	6.49859	0.792	0.006	0	si:dkey-203a12.4
si:zfos-2330d3.6	0	6.39922	0.868	0.016	0	si:zfos-2330d3.6
si:dkey-203a12.3	0	6.37445	0.792	0.008	0	si:dkey-203a12.3
si:dkey-203a12.6	0	6.33085	0.849	0.007	0	si:dkey-203a12.6
si:dkey-77g12.4	0	6.10847	0.83	0.009	0	si:dkey-77g12.4
si:dkey-203a12.7	0	5.78902	0.792	0.008	0	si:dkey-203a12.7
si:dkeyp-75b4.10	0	5.74696	0.83	0.004	0	si:dkeyp-75b4.10
si:zfos-2330d3.8	0	5.50812	0.755	0.005	0	si:zfos-2330d3.8
LOC101886910	0	5.4349	0.642	0.003	0	LOC101886910
si:dkey-203a12.5	0	5.33296	0.623	0.003	0	si:dkey-203a12.5
si:ch211-14a17.10.1	0	4.80968	0.509	0.002	0	si:ch211-14a17.10.1
si:ch1073-110a20.2	0	4.42922	0.736	0.003	0	si:ch1073-110a20.2
si:ch1073-376c22.1	0	3.8699	0.547	0.002	0	si:ch1073-376c22.1
si:ch211-14a17.10	0	3.29245	0.453	0.001	0	si:ch211-14a17.10
LOC100332723	0	2.96497	0.453	0.001	0	LOC100332723
si:ch1073-110a20.1	1.75136e-302	4.17623	0.528	0.003	3.94091e-298	si:ch1073-110a20.1
LOC110438970	1.01599e-286	5.08589	0.642	0.008	2.28618e-282	LOC110438970
itln1	1.31582e-263	3.73197	0.528	0.005	2.96085e-259	itln1
viml	3.52615e-253	2.57909	0.434	0.003	7.93455e-249	viml
LOC110437886	3.01602e-244	2.53395	0.34	0.001	6.78664e-240	LOC110437886
cst14b.2	1.94964e-242	5.44604	0.698	0.014	4.38708e-238	cst14b.2
timp4.2	1.52432e-214	3.02691	0.472	0.005	3.43004e-210	timp4.2
si:ch1073-110a20.3	2.13633e-214	4.59457	0.698	0.017	4.80718e-210	si:ch1073-110a20.3
LOC555374	1.86196e-198	2.54105	0.321	0.002	4.18978e-194	LOC555374
si:dkey-203a12.2	3.75397e-176	6.0984	0.792	0.031	8.44717e-172	si:dkey-203a12.2
nfe2	1.45858e-145	2.93063	0.491	0.012	3.2821e-141	nfe2
LOC100331492	9.98979e-118	1.87666	0.283	0.004	2.2479e-113	LOC100331492
cfi	1.70855e-96	2.29274	0.34	0.009	3.84459e-92	cfi
dok3	1.24503e-92	1.94135	0.283	0.006	2.80156e-88	dok3
c3a.4	8.01294e-77	2.57731	0.321	0.011	1.80307e-72	c3a.4
cahz1	1.19474e-59	1.71043	0.283	0.011	2.68841e-55	cahz
si:dkey-77g12.1	4.80127e-58	5.16468	0.566	0.055	1.08038e-53	si:dkey-77g12.1
gata2a	1.35103e-54	2.60486	0.472	0.039	3.04008e-50	gata2a
LOC1104377311	4.20385e-39	2.88182	0.717	0.139	9.45951e-35	LOC110437731
cfh.1	5.2244e-31	2.68799	0.302	0.028	1.17559e-26	cfh.1
slc7a3a1	6.6726e-31	3.04975	0.491	0.078	1.50147e-26	slc7a3a
si:zfos-1425h8.1	3.33688e-26	1.81408	0.321	0.037	7.50866e-22	si:zfos-1425h8.1
agr21	1.28689e-25	2.25007	0.302	0.033	2.89577e-21	agr2
gcnt3	1.83344e-22	1.56206	0.302	0.038	4.1256e-18	gcnt3
ank3b1	1.75855e-19	2.38713	0.472	0.105	3.95708e-15	ank3b
gyg1a1	8.78899e-17	3.19973	0.547	0.186	1.9777e-12	gyg1a
si:ch211-214p16.21	1.54938e-15	1.7111	0.566	0.179	3.48642e-11	si:ch211-214p16.2
unc13d2	2.71816e-13	1.64384	0.377	0.095	6.11641e-09	unc13d
cebpb2	4.24447e-13	1.34001	0.887	0.56	9.55091e-09	cebpb
si:ch211-136m16.81	7.60403e-12	2.22946	0.585	0.262	1.71106e-07	si:ch211-136m16.8
si:ch211-214p16.11	8.17954e-12	0.74398	0.755	0.337	1.84056e-07	si:ch211-214p16.1
cxcr4b2	2.5414e-10	1.13972	0.887	0.591	5.71867e-06	cxcr4b
hmha1b2	6.45143e-10	1.55201	0.491	0.191	1.4517e-05	hmha1b
mmp25b1	1.03054e-09	1.33115	0.264	0.063	2.31891e-05	mmp25b
tdh2	1.99672e-09	1.9737	0.491	0.206	4.49301e-05	tdh
rab442	4.50897e-09	1.96165	0.604	0.319	0.000101461	rab44
zgc:158446	1.17183e-07	1.31075	0.283	0.088	0.00263685	zgc:158446
actb21	3.37042e-07	0.445429	1	0.985	0.00758412	actb2
scin1	4.19476e-07	1.03533	0.264	0.076	0.00943905	scin
lxn3	6.08439e-07	1.33437	0.491	0.248	0.0136911	lxn
myh9a2	6.79801e-07	1.40434	0.453	0.214	0.0152969	myh9a
limd22	9.00287e-07	1.8226	0.434	0.216	0.0202583	limd2
ncf11	1.34606e-06	1.19104	0.472	0.223	0.0302891	ncf1
zgc:1584633	1.76308e-06	0.694577	1	1	0.0396729	zgc:158463
zgc:158852	2.40564e-06	1.53008	0.321	0.129	0.0541318	zgc:158852
unm-hu7910	2.50433e-06	1.27292	0.264	0.087	0.0563525	unm-hu7910
si:ch73-208g10.12	2.9023e-06	0.989273	0.377	0.152	0.0653075	si:ch73-208g10.1
hlx11	2.97806e-06	1.71816	0.358	0.148	0.0670123	hlx1
grap2b3	7.46393e-06	1.65782	0.509	0.34	0.167953	grap2b
pdlim1	8.26309e-06	1.44848	0.283	0.105	0.185936	pdlim1
si:dkey-102g19.31	2.07525e-05	1.04736	0.396	0.183	0.466972	si:dkey-102g19.3
LOC1104384393	2.11931e-05	1.17122	0.868	0.83	0.476887	LOC110438439
wasb2	2.66891e-05	1.14986	0.604	0.438	0.600558	wasb
nfil3-63	2.80084e-05	2.05124	0.377	0.192	0.630246	nfil3-6
myh11a3	2.94868e-05	1.05164	0.321	0.131	0.663513	myh11a
eef1a1l11	3.91458e-05	0.648218	0.981	0.969	0.880858	eef1a1l1
wu:fb05h101	4.3343e-05	1.22059	0.321	0.141	0.975304	wu:fb05h10
spi1b1	4.46852e-05	0.882546	0.66	0.45	1	spi1b
pfn12	5.11434e-05	0.465963	0.981	0.91	1	pfn1
calm1b2	5.4023e-05	0.8803	0.415	0.202	1	calm1b
si:dkey-24p1.72	5.43906e-05	1.22022	0.434	0.255	1	si:dkey-24p1.7
ccr9a2	5.84178e-05	1.27238	0.415	0.213	1	ccr9a
rpl141	8.70751e-05	0.439962	0.962	0.939	1	rpl14
grk61	9.62196e-05	1.67965	0.358	0.186	1	grk6
tnfaip8l2a2	0.000101693	1.34706	0.358	0.19	1	tnfaip8l2a
piezo11	0.000101834	1.14768	0.283	0.12	1	piezo1
ahr21	0.000137553	1.34596	0.472	0.309	1	ahr2
unkl1	0.000217105	1.4433	0.34	0.176	1	unkl
LOC5580441	0.000239328	0.78193	0.283	0.121	1	LOC558044
mkl1b1	0.000287223	1.7493	0.302	0.148	1	mkl1b
snd1	0.000444487	1.38666	0.34	0.19	1	snd1
mt-rnr13	0.000817955	0.455644	0.925	0.917	1	mt-rnr1
xbp11	0.00152512	1.18193	0.509	0.423	1	xbp1
celf21	0.00166045	1.05239	0.642	0.566	1	celf2
midn3	0.00185205	1.09785	0.415	0.265	1	midn
syk1	0.00221157	1.31291	0.377	0.249	1	syk
zbtb20	0.00221521	1.24232	0.472	0.374	1	zbtb20
parvg2	0.00226939	1.18544	0.358	0.23	1	parvg
syne1b2	0.00372945	0.931544	0.302	0.17	1	syne1b
fybb2	0.00413554	1.1214	0.453	0.346	1	fybb
crip12	0.00511227	0.253291	0.717	0.561	1	crip1
rabgap1l1	0.00616087	1.0374	0.302	0.184	1	rabgap1l
si:ch211-222l21.12	0.00721883	0.457618	0.547	0.403	1	si:ch211-222l21.1

[truncated: 2 more sheets: proximal tubule, hematopoietic stem cells]
