# Supplementary material for: Renal interstitial cells promote nephron regeneration by secreting prostaglandin E2
Source: eLife. 2023 Jan 16;12:e81438. doi: 10.7554/eLife.81438 (PMC9943066; doi:10.7554/eLife.81438)
Supplement: Figure 2—source data 2. [file elife-81438-fig2-data2.xlsx]

## Sheet: Figure 2E
		test	1	2	3		mean	SEM
	col1a1b	0 dpi	1.11613	0.736369	1.1475		1	0.186855			P Value=0.000747154944943393
	col1a1b	5 dpi	2.43148	2.55236	2.28443		2.42276	0.109557

## Sheet: Figure 2F
		test	1	2	3
	col1a2	0 dpi	1.10582	0.90445	0.989734		1	0.0825276			P Value=0.000198261896842289
	col1a2	5 dpi	3.88643	3.80645	4.52666		4.07318	0.322315
