# Supplementary material for: Renal interstitial cells promote nephron regeneration by secreting prostaglandin E2
Source: eLife. 2023 Jan 16;12:e81438. doi: 10.7554/eLife.81438 (PMC9943066; doi:10.7554/eLife.81438)
Supplement: Figure 3—source data 1. [file elife-81438-fig3-data1.xls]

Gene	Group	Con1	Con2	Con3	D11	D12	D13	D31	D32	D33	D51	D52	D53	D71	D72	D73	GeneName	Biotype	Position	NR:Seq-id	NR:Score	NR:Evalue	NR:Description	NT:Seq-id	NT:Score	NT:Evalue	NT:Description	Uniprot:UniProtKB-AC	Uniprot:Score	Uniprot:Evalue	Uniprot:Description	COG:gene	COG:Score	COG:Eval	COG:num	Pfam:pfam_ID	Pfam:pfam_Name	Pfam:pfam_Description	GO:biological_process	GO:cellular_component	GO:molecular_function	KEGG:KO	KEGG:Description
ENSDARG00000070453	4	0.802552624	0.356390705	0.326576511	1.664768597	0.929002302	1.688162382	0.33157556	0.315908785	0.501800562	0.247866591	0.54428746	0.924640619	0.288373914	0.231523139	0.357745428	gch1	protein_coding	chr17:15114044-15141342:-	gi|339515652|ref|NP_001129727.2|	1346	2.00E-169	GTP cyclohydrolase 1 [Danio rerio]	gi|167731067|emb|CU464134.14|	4422	0	Zebrafish DNA sequence from clone DKEYP-93F2 in linkage group 17, complete sequence	P22288	382	1.00E-119	GTP cyclohydrolase 1	alr5287	146	5.00E-42	COG0302	pfam01227	GTP_cyclohydroI	GTP cyclohydrolase I. This family includes GTP cyclohydrolase enzymes and a family of related bacterial proteins.	GO:0035998|7,8-dihydroneopterin 3'-triphosphate biosynthetic process;GO:0042416|dopamine biosynthetic process;GO:0045776|negative regulation of blood pressure;GO:0050884|neuromuscular process controlling posture;GO:0051000|positive regulation of nitric-oxide synthase activity;GO:0051291|protein heterooligomerization;GO:0051260|protein homooligomerization;GO:0042559|pteridine-containing compound b…	GO:0005737|cytoplasm;GO:0031410|cytoplasmic vesicle;GO:0005829|cytosol;GO:0031965|nuclear membrane;GO:0005654|nucleoplasm;GO:0005634|nucleus;GO:0043234|protein complex;	GO:0005509|calcium ion binding;GO:0050662|coenzyme binding;GO:0005525|GTP binding;GO:0003934|GTP cyclohydrolase I activity;GO:0042803|protein homodimerization activity;GO:0008270|zinc ion binding;	K01495	GCH1, folE; GTP cyclohydrolase I [EC:3.5.4.16]
ENSDARG00000100691	6	7.426626947	5.970432108	3.535809809	5.13512134	4.970002762	5.26388236	6.718561986	9.647032311	7.60379749	11.13650349	11.07025541	10.2170166	16.94524248	11.64257251	17.7538335	prss35	protein_coding	chr16:33041852-33050822:+	gi|50345082|ref|NP_001002212.1|	1928	0	inactive serine protease 35 precursor [Danio rerio]	gi|50345081|ref|NM_001002212.1|	2240	0	Danio rerio protease, serine, 35 (prss35), mRNA	Q1WK24	426	4.00E-140	Inactive serine protease 35	.	.	.	.	pfam00089	Trypsin	Trypsin.	.	GO:0005576|extracellular region;	.	.	.
ENSDARG00000100690	1	4.92313496	7.03612214	9.883109965	22.57321098	8.666956865	15.25850325	6.078617677	14.46960545	10.77376281	2.534165451	15.4189821	3.607234244	7.665602452	3.239150456	3.539570978	si:ch211-256e16.11	protein_coding	chr3:58118379-58118905:-	gi|688545231|ref|XP_009298112.1|	818	6.00E-109	PREDICTED: stonustoxin subunit beta-like [Danio rerio]	gi|157154287|emb|CT583687.16|	527	0	Zebrafish DNA sequence from clone CH211-256E16 in linkage group 3, complete sequence	Q91453	113	1.00E-27	Stonustoxin subunit beta	.	.	.	.	pfam13765	PRY	SPRY-associated domain. SPRY and PRY domains occur on PYRIN proteins. Their function is not known.	GO:0044179|hemolysis in other organism;	GO:0005576|extracellular region;	.	.	.
ENSDARG00000044524	6	2.450429655	1.972136972	2.875457114	2.632477545	2.935466077	4.673235559	1.104138838	1.615081582	2.013167247	1.871181984	2.367198554	3.179123936	3.04690679	2.595746761	2.933564831	def6b	protein_coding	chr22:961949-979519:+	gi|326678034|ref|XP_003200968.1|	2569	0	PREDICTED: differentially expressed in FDCP 6 homolog isoform X1 [Danio rerio]	gi|284009737|emb|FP067424.7|	2104	0	Zebrafish DNA sequence from clone CH73-352P18 in linkage group 22, complete sequence	Q7SYB5	627	0	Differentially expressed in FDCP 6 homolog	.	.	.	.	pfam00169	PH	PH domain. PH stands for pleckstrin homology.	GO:0042074|cell migration involved in gastrulation;GO:0060026|convergent extension;GO:0060027|convergent extension involved in gastrulation;	.	.	.	.
ENSDARG00000020956	5	86.5506225	109.7957668	89.0826797	37.86365517	24.15495783	46.41236145	57.25569037	35.15912654	55.25798686	57.99830617	58.01818952	28.07183602	38.44801723	32.03906759	51.08687467	pck2	protein_coding	chr24:12775600-12794503:-	gi|47085983|ref|NP_998357.1|	3379	0	phosphoenolpyruvate carboxykinase [GTP], mitochondrial [Danio rerio]	gi|47085982|ref|NM_213192.1|	2997	0	Danio rerio phosphoenolpyruvate carboxykinase 2 (mitochondrial) (pck2), mRNA	Q9Z2V4	889	0	Phosphoenolpyruvate carboxykinase, cytosolic [GTP]	TP0122	601	0	COG1274	pfam00821	PEPCK	Phosphoenolpyruvate carboxykinase. Catalyses the formation of phosphoenolpyruvate by decarboxylation of oxaloacetate.	GO:0007568|aging;GO:0071320|cellular response to cAMP;GO:0071332|cellular response to fructose stimulus;GO:0071377|cellular response to glucagon stimulus;GO:0071456|cellular response to hypoxia;GO:0032869|cellular response to insulin stimulus;GO:0071347|cellular response to interleukin-1;GO:0051365|cellular response to potassium ion starvation;GO:0071300|cellular response to retinoic acid;GO:0071…	GO:0005829|cytosol;GO:0070062|extracellular exosome;	GO:0031406|carboxylic acid binding;GO:0019003|GDP binding;GO:0005525|GTP binding;GO:0000287|magnesium ion binding;GO:0030145|manganese ion binding;GO:0004550|nucleoside diphosphate kinase activity;GO:0004613|phosphoenolpyruvate carboxykinase (GTP) activity;GO:0004611|phosphoenolpyruvate carboxykinase activity;	K01596	E4.1.1.32, pckA, PEPCK; phosphoenolpyruvate carboxykinase (GTP) [EC:4.1.1.32]
ENSDARG00000044526	3	0.121073878	0.027809717	0.118242368	0.935127865	2.391312792	1.688624783	0.025873352	0.057189972	0.141941486	0.26568993	0.128299596	0.082594061	0.182718363	0	0.130572162	camk1ga	protein_coding	chr22:1032469-1052509:+	gi|41152373|ref|NP_956260.1|	2313	0	calcium/calmodulin-dependent protein kinase IGa [Danio rerio]	gi|41152372|ref|NM_199966.1|	1743	0	Danio rerio calcium/calmodulin-dependent protein kinase IGa (camk1ga), mRNA	Q63450	228	2.00E-71	Calcium/calmodulin-dependent protein kinase type 1	.	.	.	.	pfam00069	Pkinase	Protein kinase domain.	GO:0007049|cell cycle;GO:0032091|negative regulation of protein binding;GO:0006913|nucleocytoplasmic transport;GO:0060999|positive regulation of dendritic spine development;GO:0051149|positive regulation of muscle cell differentiation;GO:0010976|positive regulation of neuron projection development;GO:0033138|positive regulation of peptidyl-serine phosphorylation;GO:1901985|positive regulation of …	GO:0005737|cytoplasm;GO:0005634|nucleus;	GO:0005524|ATP binding;GO:0004683|calmodulin-dependent protein kinase activity;	K08794	CAMK1; calcium/calmodulin-dependent protein kinase I [EC:2.7.11.17]
ENSDARG00000011727	6	4.011443301	3.224889314	3.561481068	3.581133293	2.770260185	1.959425281	3.545860312	3.875787175	3.29198308	4.223609085	4.018982804	4.726720733	5.700063362	4.651087834	6.37122776	b9d1	protein_coding	chr3:39549667-39554208:-	gi|66773348|ref|NP_001019544.1|	1059	4.00E-140	B9 domain-containing protein 1 [Danio rerio]	gi|66773347|ref|NM_001024373.1|	1388	0	Danio rerio B9 protein domain 1 (b9d1), mRNA	Q503B7	311	7.00E-106	B9 domain-containing protein 1	.	.	.	.	pfam07162	B9-C2	Ciliary basal body-associated, B9 protein. The B9-C2 domain is found in proteins associated with the ciliary basal body. B9 domains were identified as a specific family of C2 domains. There are three sub-families represented by this family, notably, Mks1-Xbx7, Stumpy-Tza1 and Tza2 groups of proteins. Mutations in human Mks1 result in the developmental disorder Mechler-Gruber syndrome; mutations i…	GO:0042384|cilium assembly;GO:0060271|cilium morphogenesis;GO:0007224|smoothened signaling pathway;	GO:0005813|centrosome;GO:0036064|ciliary basal body;GO:0035869|ciliary transition zone;GO:0005737|cytoplasm;GO:0036038|TCTN-B9D complex;	GO:0008158|hedgehog receptor activity;	K16744	B9D1; B9 domain-containing protein 1
ENSDARG00000040644	4	0.990904213	0.665300776	0.781628325	1.00923447	1.158059586	1.707919002	0.358354825	0.396050383	0.428932009	0.334536078	0.678488427	0.2773227	0.657327827	0.486076802	0.230168823	pxylp1	protein_coding	chr15:41858307-41888313:+	gi|528502483|ref|XP_005157851.1|	2638	0	PREDICTED: acid phosphatase-like protein 2 isoform X1 [Danio rerio]	gi|50539919|ref|NM_001002430.1|	1825	0	Danio rerio 2-phosphoxylose phosphatase 1 (pxylp1), mRNA	Q6DH46	562	0	2-phosphoxylose phosphatase 1	.	.	.	.	pfam00328	His_Phos_2	Histidine phosphatase superfamily (branch 2). The histidine phosphatase superfamily is so named because catalysis centres on a conserved His residue that is transiently phosphorylated during the catalytic cycle. Other conserved residues contribute to a 'phosphate pocket' and interact with the phospho group of substrate before, during and after its transfer to the His residue. Structure and sequen…	GO:0050650|chondroitin sulfate proteoglycan biosynthetic process;GO:0006024|glycosaminoglycan biosynthetic process;GO:0010909|positive regulation of heparan sulfate proteoglycan biosynthetic process;	GO:0005794|Golgi apparatus;GO:0000139|Golgi membrane;GO:0016021|integral component of membrane;	GO:0003993|acid phosphatase activity;GO:0016791|phosphatase activity;	.	.
ENSDARG00000040649	4	0.888872595	0.89444607	1.19878386	0.498162982	0.330725183	0.49033786	0.144724633	0.226593431	0.277886306	0.646753741	0.514318618	0.474829615	0.194676103	0.385601535	0.389528354	prickle1a	protein_coding	chr25:291701-325877:-	gi|528520671|ref|XP_005174267.1|	3946	0	PREDICTED: prickle homolog 1a isoform X1 [Danio rerio]	gi|256772745|emb|CU929262.5|	3312	0	Zebrafish DNA sequence from clone ZFOS-1598G7 in linkage group 25, complete sequence	Q96MT3	938	0	Prickle-like protein 1	.	.	.	.	pfam06297	PET	PET Domain. This domain is suggested to be involved in protein-protein interactions. The family is found in conjunction with pfam00412.	GO:0035904|aorta development;GO:0060976|coronary vasculature development;GO:0090090|negative regulation of canonical Wnt signaling pathway;GO:2000691|negative regulation of cardiac muscle cell myoblast differentiation;GO:0045892|negative regulation of transcription, DNA-templated;GO:0001843|neural tube closure;GO:0032436|positive regulation of proteasomal ubiquitin-dependent protein catabolic pro…	GO:0005829|cytosol;GO:0031965|nuclear membrane;GO:0005634|nucleus;	GO:0008270|zinc ion binding;	K04511	PRICKLE; prickle
ENSDARG00000061778	3	4.882883486	0.036772456	5.850113395	0.117762704	2.61762994	0.036604071	0.022808016	0.088225218	0.012512502	2.771513534	0.033929804	0.060673966	0.701808795	0.571230866	0.955352179	fmn2b	protein_coding	chr12:47448300-47543432:+	gi|688581321|ref|XP_009305264.1|	3636	0	PREDICTED: formin-2 isoform X1 [Danio rerio]	gi|187466966|emb|CU607101.8|	1862	0	Zebrafish DNA sequence from clone CH73-367A6 in linkage group 12, complete sequence	Q9JL04	198	1.00E-49	Formin-2	.	.	.	.	pfam02181	FH2	Formin Homology 2 Domain.	GO:0051017|actin filament bundle assembly;GO:0045010|actin nucleation;GO:0006974|cellular response to DNA damage stimulus;GO:0071456|cellular response to hypoxia;GO:0051295|establishment of meiotic spindle localization;GO:0070649|formin-nucleated actin cable assembly;GO:0051758|homologous chromosome movement towards spindle pole involved in homologous chromosome segregation;GO:0046907|intracellul…	GO:0005884|actin filament;GO:0005938|cell cortex;GO:0030659|cytoplasmic vesicle membrane;GO:0005829|cytosol;GO:0005783|endoplasmic reticulum;GO:0005789|endoplasmic reticulum membrane;GO:0005902|microvillus;GO:0005730|nucleolus;GO:0005886|plasma membrane;GO:0005819|spindle;	GO:0003779|actin binding;	K02184	FMN2; formin 2
ENSDARG00000044528	4	0.245970053	0.477089028	0.880798027	0.771973155	1.02026436	1.149768539	0.163530969	0.258189842	0.333220692	0.266551942	0.370701661	0.149151657	0.589214505	0.647338752	0.259371672	slc15a1b	protein_coding	chr6:12321569-12353186:-	gi|37620183|ref|NP_932330.1|	3694	0	solute carrier family 15 member 1 [Danio rerio]	gi|37620182|ref|NM_198064.1|	2566	0	Danio rerio solute carrier family 15 (oligopeptide transporter), member 1b (slc15a1b), mRNA	Q8WMX5	795	0	Solute carrier family 15 member 1	ECU11g1050	192	4.00E-52	COG3104	pfam00854	PTR2	POT family. The POT (proton-dependent oligopeptide transport) family all appear to be proton dependent transporters.	GO:0015031|protein transport;	GO:0016021|integral component of membrane;	GO:0015198|oligopeptide transporter activity;GO:0015293|symporter activity;	K14206	SLC15A1, PEPT1; solute carrier family 15 (oligopeptide transporter), member 1
ENSDARG00000069046	2	0.813615738	0	0.041820422	0.151195277	1.189652859	0	0	0	0	0.041764556	0	0	0.886279444	0.195053738	0.184725085	CABZ01118678.1	protein_coding	chr1:58386178-58392975:-	gi|528469862|ref|XP_003197844.2|	1334	1.00E-177	PREDICTED: keratin, type I cytoskeletal 47 kDa-like [Danio rerio]	gi|119709390|emb|AM419450.1|	38	2.00E-08	Polypterus senegalus partial mRNA for keratin K10 (krt10 gene), clone bichir_krt10	Q6P864	206	2.00E-58	Keratin, type I cytoskeletal 18	.	.	.	.	pfam00038	Filament	Intermediate filament protein.	.	GO:0005882|intermediate filament;	GO:0005198|structural molecule activity;	K07604	KRT1; type I keratin, acidic
ENSDARG00000069043	6	3.30368267	3.484996586	5.807557221	3.283376143	6.86233023	4.923796564	2.363770153	0.947867951	2.134501127	2.195808734	0.020745761	0.912610624	2.342508798	3.410943456	2.744719951	HSD11B1L	protein_coding	chr2:53729740-53753878:-	gi|688539602|ref|XP_009297199.1|	1492	0	PREDICTED: hydroxysteroid 11-beta-dehydrogenase 1-like protein [Danio rerio]	gi|385273850|emb|FQ378017.5|	2088	0	Zebrafish DNA sequence from clone CH1073-141A18 in linkage group 2, complete sequence	Q6PUF3	342	1.00E-107	Hydroxysteroid 11-beta-dehydrogenase 1-like protein	.	.	.	.	pfam00106	adh_short	short chain dehydrogenase. This family contains a wide variety of dehydrogenases.	.	GO:0005576|extracellular region;	GO:0016229|steroid dehydrogenase activity;	.	.
ENSDARG00000060434	3	0.949182122	0.45179978	0.212201146	0.14132272	0.069498276	0.062753156	0.078203049	0.118840253	0.117981259	0.133842743	0.135726395	0.561697283	0.187378066	0.187526434	0.522922654	map1b	protein_coding	chr5:34674156-34701756:-	gi|326667820|ref|XP_003198677.1|	5790	0	PREDICTED: microtubule-associated protein 1B [Danio rerio]	gi|189339114|dbj|AB370231.1|	6102	0	Danio rerio map1b mRNA for hypothetical microtubule-associated protein 1b, complete cds	P14873	380	6.00E-105	Microtubule-associated protein 1B	.	.	.	.	pfam01757	Acyl_transf_3	Acyltransferase family. This family includes a range of acyltransferase enzymes. This domain is found in many as yet uncharacterized C. elegans proteins and it is approximately 300 amino acids long.	GO:0048675|axon extension;GO:0007409|axonogenesis;GO:0009987|cellular process;GO:0016358|dendrite development;GO:0061162|establishment of monopolar cell polarity;GO:0001578|microtubule bundle formation;GO:0007017|microtubule-based process;GO:0047497|mitochondrion transport along microtubule;GO:0032387|negative regulation of intracellular transport;GO:0045773|positive regulation of axon extension;	GO:0030054|cell junction;GO:0005737|cytoplasm;GO:0005829|cytosol;GO:0043197|dendritic spine;GO:0005874|microtubule;GO:0005875|microtubule associated complex;GO:0001750|photoreceptor outer segment;GO:0005886|plasma membrane;GO:0014069|postsynaptic density;	GO:0005519|cytoskeletal regulatory protein binding;	K10429	MAP1; microtubule-associated protein 1
ENSDARG00000000002	6	2.1034029	2.059681162	0.864931117	2.100969853	3.027498631	1.518703486	2.436735246	2.588472149	2.959120227	2.510348107	2.533946576	4.279518458	1.909380831	2.596956249	2.984757273	ccdc80	protein_coding	chr9:34279971-34304024:+	gi|55742450|ref|NP_001007199.1|	2176	0	coiled-coil domain-containing protein 80 precursor [Danio rerio]	gi|166831573|gb|EU269066.1|	2604	0	Danio rerio CL2 mRNA, complete cds	Q90X49	567	0	Coiled-coil domain-containing protein 80	.	.	.	.	pfam13778	DUF4174	Domain of unknown function (DUF4174). This domain of unknown function is found in a putative tumor suppressor gene and in a ligand for the the urokinase-type plasminogen activator receptor, which plays a role in cellular migration and adhesion.	GO:0001756|somitogenesis;	GO:0005578|proteinaceous extracellular matrix;	.	.	.
ENSDARG00000016868	6	4.052084977	4.617397813	9.970391607	12.77417927	18.91440547	39.97056796	5.330505724	4.648350375	4.170550761	7.442141886	4.840412571	4.33185095	2.314470718	1.941607205	2.474425893	rhobtb2a	protein_coding	chr5:42857792-42902590:+	gi|528479825|ref|XP_005165369.1|	3348	0	PREDICTED: rho-related BTB domain-containing protein 2 isoform X2 [Danio rerio]	gi|153791381|ref|NM_001099974.1|	2273	0	Danio rerio Rho-related BTB domain containing 2a (rhobtb2a), mRNA	Q9BYZ6	866	0	Rho-related BTB domain-containing protein 2	.	.	.	.	pfam00071	Ras	Ras family. Includes sub-families Ras, Rab, Rac, Ral, Ran, Rap Ypt1 and more. Shares P-loop motif with GTP_EFTU, arf and myosin_head. See pfam00009 pfam00025, pfam00063. As regards Rab GTPases, these are important regulators of vesicle formation, motility and fusion. They share a fold in common with all Ras GTPases: this is a six-stranded beta-sheet surrounded by five alpha-helices.	GO:0051056|regulation of small GTPase mediated signal transduction;GO:0007264|small GTPase mediated signal transduction;	GO:0005829|cytosol;GO:0005886|plasma membrane;	GO:0005525|GTP binding;	K07868	RHOBTB1_2; Rho-related BTB domain-containing protein 1/2
ENSDARG00000091834	1	5.086372217	6.998510021	8.267033288	14.29340505	6.357093386	18.36000152	8.076001323	5.339063115	15.74009611	11.87472541	11.95678742	7.554254287	5.392861598	4.342682267	5.43770061	si:ch211-198m17.1	protein_coding	chr3:38563567-38603740:-	gi|528474748|ref|XP_002661255.2|	3565	0	PREDICTED: flocculation protein FLO11 isoform X2 [Danio rerio]	gi|93204821|emb|CR388126.11|	2384	0	Zebrafish DNA sequence from clone CH211-198M17 in linkage group 3, complete sequence	Q9ULI3	95.5	4.00E-18	Protein HEG homolog 1	.	.	.	.	pfam05109	Herpes_BLLF1	Herpes virus major outer envelope glycoprotein (BLLF1). This family consists of the BLLF1 viral late glycoprotein, also termed gp350/220. It is the most abundantly expressed glycoprotein in the viral envelope of the Herpesviruses and is the major antigen responsible for stimulating the production of neutralizing antibodies in vivo.	GO:0003209|cardiac atrium morphogenesis;GO:0055017|cardiac muscle tissue growth;GO:0007043|cell-cell junction assembly;GO:0001886|endothelial cell morphogenesis;GO:0001701|in utero embryonic development;GO:0030324|lung development;GO:0003017|lymph circulation;GO:0001945|lymph vessel development;GO:0035264|multicellular organism growth;GO:0060039|pericardium development;GO:0090271|positive regulat…	GO:0005911|cell-cell junction;GO:0009897|external side of plasma membrane;GO:0005576|extracellular region;GO:0016021|integral component of membrane;	GO:0005509|calcium ion binding;	.	.
ENSDARG00000059304	5	47.77117247	55.53510689	37.13274838	73.34638642	79.82179186	97.73591786	95.19522535	110.8766858	86.9348326	63.7069403	78.57959058	45.70233374	69.71703749	58.61817438	44.32075703	chchd2	protein_coding	chr15:5785268-5792797:-	gi|41152140|ref|NP_957061.1|	318	3.00E-32	coiled-coil-helix-coiled-coil-helix domain-containing protein 2, mitochondrial [Danio rerio]	gi|156230061|gb|BC152211.1|	914	0	Danio rerio coiled-coil-helix-coiled-coil-helix domain containing 2-like, mRNA (cDNA clone MGC:173983 IMAGE:8154601), complete cds	Q9Y6H1	99.4	1.00E-23	Coiled-coil-helix-coiled-coil-helix domain-containing protein 2	.	.	.	.	pfam06747	CHCH	CHCH domain. we have identified a conserved motif in the LOC118487 protein that we have called the CHCH motif. Alignment of this protein with related members showed the presence of three subgroups of proteins, which are called the S (Small), N (N-terminal extended) and C (C-terminal extended) subgroups. All three sub-groups of proteins have in common that they contain a predicted conserved [coile…	GO:0007005|mitochondrion organization;GO:0045944|positive regulation of transcription from RNA polymerase II promoter;GO:1900037|regulation of cellular response to hypoxia;GO:0006351|transcription, DNA-templated;	GO:0005758|mitochondrial intermembrane space;GO:0005739|mitochondrion;GO:0005634|nucleus;	GO:0043565|sequence-specific DNA binding;GO:0008134|transcription factor binding;	.	.
ENSDARG00000059305	6	9.452843972	9.837281694	8.006919328	5.33032785	8.549455796	11.23664384	3.156657397	2.96211063	5.772485324	4.168003044	3.760679046	1.352026366	3.885648447	2.560188739	2.985688386	tmem37	protein_coding	chr9:917562-923562:+	gi|46249715|gb|AAH68385.1|	919	5.00E-113	Tmem37 protein [Danio rerio]	gi|46249714|gb|BC068385.1|	3103	0	Danio rerio transmembrane protein 37, mRNA (cDNA clone MGC:85779 IMAGE:6960780), complete cds	Q9JJV3	133	3.00E-33	Voltage-dependent calcium channel gamma-like subunit	.	.	.	.	pfam15108	TMEM37	Voltage-dependent calcium channel gamma-like subunit protein family. This family of transmembrane proteins, TMEM37, has a role in stabilizing the calcium channel in an inactivated (closed) state. It is a subunit of the L-type calcium channels. This family of proteins are found in eukaryotes. Proteins in this family are approximately 210 amino acids in length.	.	GO:0016021|integral component of membrane;	GO:0005262|calcium channel activity;GO:0005244|voltage-gated ion channel activity;	.	.
ENSDARG00000013847	6	7.481551255	8.14306073	6.323160827	4.8556337	4.219386852	8.767934691	5.399281668	3.616506262	7.820752976	4.188165063	4.994937338	4.087547667	3.050103587	2.054564535	2.678125507	egfra	protein_coding	chr2:3864859-3989336:+	gi|35903183|ref|NP_919405.1|	6062	0	epidermal growth factor receptor precursor [Danio rerio]	gi|35903182|ref|NM_194424.1|	5932	0	Danio rerio epidermal growth factor receptor a (erythroblastic leukemia viral (v-erb-b) oncogene homolog, avian) (egfra), mRNA	P00534	209	7.00E-56	Tyrosine-protein kinase transforming protein erbB	.	.	.	.	pfam07714	Pkinase_Tyr	Protein tyrosine kinase.	.	.	GO:0005524|ATP binding;GO:0004714|transmembrane receptor protein tyrosine kinase activity;	K04361	EGFR, ERBB1; epidermal growth factor receptor [EC:2.7.10.1]
ENSDARG00000093089	3	0	0	0.19826414	0.358396692	0	0	2.95007236	2.013771674	1.142409054	0.692997506	0.430255404	1.754212554	0.350142795	1.572023236	0.700602406	tac3a	protein_coding	chr23:28212948-28214878:-	gi|373838776|ref|NP_001243318.1|	451	2.00E-53	tachykinin 3a precursor [Danio rerio]	gi|341834747|gb|JN392856.1|	488	0	Danio rerio tachykinin 3a mRNA, complete cds	.	.	.	.	.	.	.	.	pfam01180	DHO_dh	Dihydroorotate dehydrogenase.	.	.	.	.	.
ENSDARG00000093087	4	0.621286428	0.142704602	0.151689159	0.822613096	1.61814582	0	1.062145728	1.614076024	1.74808282	2.423784379	1.053383921	7.628914396	1.741281247	0.141498035	0.134005309	si:ch211-225p5.10	processed_transcript	chr16:41998043-41999084:-	gi|169146153|emb|CAQ14506.1|	196	2.00E-17	novel protein, partial [Danio rerio]	gi|38198310|emb|BX649388.7|	416	0	Zebrafish DNA sequence from clone CH211-225P5 in linkage group 16, complete sequence	.	.	.	.	.	.	.	.	pfam00898	Orbi_VP2	Orbivirus outer capsid protein VP2. VP2 acts as an anchor for VP1 and VP3. VP2 contains a non-specific DNA and RNA binding domain in the N-terminus.	.	.	.	.	.
ENSDARG00000020488	6	5.031503831	3.615123537	3.555628148	2.984155698	1.855257241	4.860137072	2.464564687	3.460845667	4.602315735	3.617043774	3.623217617	4.9570345	2.203636367	1.740776575	2.477773726	arhgap17a	protein_coding	chr12:20290585-20363558:+	gi|688579780|ref|XP_009304903.1|	3667	0	PREDICTED: rho GTPase-activating protein 17 isoform X1 [Danio rerio]	gi|262317486|emb|FP236860.5|	3488	0	Zebrafish DNA sequence from clone CH73-335A12 in linkage group 12, complete sequence	Q99N37	767	0	Rho GTPase-activating protein 17	.	.	.	.	pfam03114	BAR	BAR domain. BAR domains are dimerization, lipid binding and curvature sensing modules found in many different protein families. A BAR domain with an additional N-terminal amphipathic helix (an N-BAR) can drive membrane curvature. These N-BAR domains are found in amphiphysin, endophilin, BRAP and Nadrin. BAR domains are also frequently found alongside domains that determine lipid specificity, like…	GO:0007015|actin filament organization;GO:0017156|calcium ion-dependent exocytosis;GO:0007165|signal transduction;	GO:0005923|bicellular tight junction;GO:0005737|cytoplasm;GO:0016020|membrane;	GO:0005096|GTPase activator activity;	.	.
ENSDARG00000093081	1	13.2254696	19.19528705	15.53684276	8.967066161	8.819468529	8.589560724	10.97738909	12.13210721	12.04441461	18.1332592	16.2490073	20.74655916	5.454684626	8.905344395	6.283993652	si:ch73-92i20.1	protein_coding	chr5:21387505-21405282:+	gi|528479013|ref|XP_001337715.5|	693	3.00E-86	PREDICTED: GRB2-associated-binding protein 3 [Danio rerio]	gi|145585539|emb|CU104724.5|	304	4.00E-157	Zebrafish DNA sequence from clone CH73-149C21 in linkage group 5, complete sequence	Q8WWW8	172	6.00E-50	GRB2-associated-binding protein 3	.	.	.	.	pfam00169	PH	PH domain. PH stands for pleckstrin homology.	GO:0030225|macrophage differentiation;	.	.	.	.
ENSDARG00000045123	1	13.57519948	16.08948089	17.5296538	7.855398395	11.62843342	17.45046883	8.058347142	6.42657645	5.587913688	10.78325336	11.55944449	6.914668329	6.607864334	5.45522603	7.05331252	oplah	protein_coding	chr12:13614145-13683609:+	gi|318055762|ref|NP_001186988.1|	6826	0	5-oxoprolinase [Danio rerio]	gi|46255793|gb|BC068982.1|	4648	0	Danio rerio cDNA clone IMAGE:6805667, partial cds	O14841	385	5.00E-110	5-oxoprolinase	SPAC11D3.15_1	675	0	COG0145	pfam02538	Hydantoinase_B	Hydantoinase B/oxoprolinase. This family includes N-methylhydaintoinase B which converts hydantoin to N-carbamyl-amino acids, and 5-oxoprolinase EC:3.5.2.9 which catalyses the formation of L-glutamate from 5-oxo-L-proline. These enzymes are part of the oxoprolinase family and are related to pfam01968.	GO:0006750|glutathione biosynthetic process;GO:0006749|glutathione metabolic process;	GO:0005829|cytosol;	GO:0017168|5-oxoprolinase (ATP-hydrolyzing) activity;GO:0005524|ATP binding;	K01469	OPLAH, OXP1, oplAH; 5-oxoprolinase (ATP-hydrolysing) [EC:3.5.2.9]
ENSDARG00000044525	4	1.349313696	1.10601305	0.981858754	4.005155393	5.570049182	5.335365913	1.390849417	1.599639621	1.538449785	1.30309553	1.334518323	1.251362692	2.178912646	1.108712941	1.3581566	pparda	protein_coding	chr22:980940-1005533:+	gi|528514824|ref|XP_699900.6|	2339	0	PREDICTED: peroxisome proliferator-activated receptor delta [Danio rerio]	gi|284009737|emb|FP067424.7|	4083	0	Zebrafish DNA sequence from clone CH73-352P18 in linkage group 22, complete sequence	Q03181	624	0	Peroxisome proliferator-activated receptor delta	.	.	.	.	pfam00105	zf-C4	Zinc finger, C4 type (two domains). In nearly all cases, this is the DNA binding domain of a nuclear hormone receptor. The alignment contains two Zinc finger domains that are too dissimilar to be aligned with each other.	GO:0060612|adipose tissue development;GO:0006915|apoptotic process;GO:0097190|apoptotic signaling pathway;GO:0008366|axon ensheathment;GO:0030154|cell differentiation;GO:0008283|cell proliferation;GO:0031589|cell-substrate adhesion;GO:0071456|cellular response to hypoxia;GO:0071222|cellular response to lipopolysaccharide;GO:0008203|cholesterol metabolic process;GO:0046697|decidualization;GO:00075…	GO:0000790|nuclear chromatin;GO:0005654|nucleoplasm;GO:0005634|nucleus;	GO:0003677|DNA binding;GO:0008144|drug binding;GO:0070539|linoleic acid binding;GO:0008289|lipid binding;GO:0004879|RNA polymerase II transcription factor activity, ligand-activated sequence-specific DNA binding;GO:0043565|sequence-specific DNA binding;GO:0003707|steroid hormone receptor activity;GO:0003713|transcription coactivator activity;GO:0003700|transcription factor activity, sequence-spec…	K04504	NR1C2, PPARD; peroxisome proliferator-activated receptor delta
ENSDARG00000041117	3	0.191038372	0.52656012	0.559711886	1.306877267	0.704878188	0.524148956	0.408246867	0.451190599	0	0.186321397	0.283415422	0.173763163	0.205932227	1.261761136	0.453255864	wnt2	protein_coding	chr18:20624175-20647483:-	gi|18859561|ref|NP_571025.1|	1895	0	protein Wnt-2 precursor [Danio rerio]	gi|33604149|gb|BC056277.1|	1491	0	Danio rerio wingless-type MMTV integration site family member 2, mRNA (cDNA clone MGC:65730 IMAGE:6788980), complete cds	Q92048	734	0	Protein Wnt-2	.	.	.	.	pfam00110	wnt	wnt family. Wnt genes have been identified in vertebrates and invertebrates but not in plants, unicellular eukaryotes or prokaryotes. In humans, 19 WNT proteins are known. Because of their insolubility little is known about Wnt protein structure, but all have 23 or 24 Cys residues whose spacing is highly conserved. Signal transduction by Wnt proteins (including the Wnt/beta-catenin, the Wnt/Ca++,…	GO:0045165|cell fate commitment;GO:0072574|hepatocyte proliferation;GO:0001889|liver development;GO:0007275|multicellular organismal development;GO:0030182|neuron differentiation;GO:0048794|swim bladder development;GO:0016055|Wnt signaling pathway;	GO:0005615|extracellular space;GO:0005578|proteinaceous extracellular matrix;	GO:0005109|frizzled binding;	.	.
ENSDARG00000045129	6	9.537645114	1.682938755	9.191219696	2.536810939	3.125673433	1.877415659	2.699581605	2.476348332	1.954911199	8.254887026	3.105682306	3.561992556	5.528711764	4.517024027	5.149750045	fkbp10b	protein_coding	chr12:13866983-13918734:+	gi|255069762|ref|NP_001122138.1|	3215	0	peptidyl-prolyl cis-trans isomerase FKBP10 [Danio rerio]	gi|28279177|gb|BC045938.1|	2001	0	Danio rerio FK506 binding protein 10, mRNA (cDNA clone IMAGE:5411937), partial cds	Q61576	140	3.00E-36	Peptidyl-prolyl cis-trans isomerase FKBP10	YDR519w	84	5.00E-19	COG0545	pfam00254	FKBP_C	FKBP-type peptidyl-prolyl cis-trans isomerase.	GO:0061077|chaperone-mediated protein folding;	GO:0005788|endoplasmic reticulum lumen;GO:0005789|endoplasmic reticulum membrane;	GO:0005509|calcium ion binding;GO:0005528|FK506 binding;GO:0003755|peptidyl-prolyl cis-trans isomerase activity;	K09575	FKBP9_10; FK506-binding protein 9/10 [EC:5.2.1.8]
ENSDARG00000023026	6	1.325813593	1.08021588	1.465819569	2.318506887	3.45309285	4.003662955	1.133299538	2.174171762	2.181918022	2.293382928	2.099455216	2.571118822	1.445356885	0.979926688	1.402846278	pkp2	protein_coding	chr4:16721049-16736168:+	gi|198281999|ref|NP_001106904.1|	4177	0	plakophilin-2 [Danio rerio]	gi|198281998|ref|NM_001113433.1|	2800	0	Danio rerio plakophilin 2 (pkp2), mRNA	Q99959	440	2.00E-137	Plakophilin-2	.	.	.	.	pfam00514	Arm	Armadillo/beta-catenin-like repeat. Approx. 40 amino acid repeat. Tandem repeats form super-helix of helices that is proposed to mediate interaction of beta-catenin with its ligands. CAUTION: This family does not contain all known armadillo repeats.	GO:0034334|adherens junction maintenance;GO:0086073|bundle of His cell-Purkinje myocyte adhesion involved in cell communication;GO:0086001|cardiac muscle cell action potential;GO:0086002|cardiac muscle cell action potential involved in contraction;GO:0086064|cell communication by electrical coupling involved in cardiac conduction;GO:0086019|cell-cell signaling involved in cardiac conduction;GO:00…	GO:0005912|adherens junction;GO:0030054|cell junction;GO:0005913|cell-cell adherens junction;GO:0005911|cell-cell junction;GO:0030057|desmosome;GO:0016021|integral component of membrane;GO:0014704|intercalated disc;GO:0005882|intermediate filament;GO:0005654|nucleoplasm;GO:0005634|nucleus;GO:0005886|plasma membrane;	GO:0045294|alpha-catenin binding;GO:0098641|cadherin binding involved in cell-cell adhesion;GO:0086083|cell adhesive protein binding involved in bundle of His cell-Purkinje myocyte communication;GO:0019215|intermediate filament binding;GO:0044325|ion channel binding;GO:0032947|protein complex scaffold;GO:0005080|protein kinase C binding;GO:0017080|sodium channel regulator activity;	K12642	PKP2; plakophilin 2
ENSDARG00000001014	5	71.34511031	68.47693603	57.20449233	38.90836718	47.24055621	73.89482916	45.5787416	68.32098007	89.60888411	62.66239775	98.85451967	123.7515441	38.67082181	32.3837665	41.86880097	myh9b	protein_coding	chr3:5196305-5318329:-	gi|528473035|ref|XP_001920098.4|	8065	0	PREDICTED: myosin-9 isoform X1 [Danio rerio]	gi|597735180|ref|XM_007229809.1|	3068	0	PREDICTED: Astyanax mexicanus myosin, heavy chain 9, non-muscle (myh9), transcript variant X1, mRNA	P35579	2546	0	Myosin-9	SPCC645.05c	776	0	COG5022	pfam00063	Myosin_head	Myosin head (motor domain).	GO:0031532|actin cytoskeleton reorganization;GO:0030048|actin filament-based movement;GO:0031032|actomyosin structure organization;GO:0001525|angiogenesis;GO:0043534|blood vessel endothelial cell migration;GO:0000910|cytokinesis;GO:0051295|establishment of meiotic spindle localization;GO:0001768|establishment of T cell polarity;GO:0001701|in utero embryonic development;GO:0007229|integrin-mediate…	GO:0015629|actin cytoskeleton;GO:0042641|actomyosin;GO:0005826|actomyosin contractile ring;GO:0005903|brush border;GO:0031252|cell leading edge;GO:0005913|cell-cell adherens junction;GO:0032154|cleavage furrow;GO:0005737|cytoplasm;GO:0005829|cytosol;GO:0070062|extracellular exosome;GO:0031012|extracellular matrix;GO:0005925|focal adhesion;GO:0001772|immunological synapse;GO:0016020|membrane;GO:00…	GO:0003779|actin binding;GO:0051015|actin filament binding;GO:0030898|actin-dependent ATPase activity;GO:0043531|ADP binding;GO:0005524|ATP binding;GO:0016887|ATPase activity;GO:0098641|cadherin binding involved in cell-cell adhesion;GO:0000146|microfilament motor activity;GO:0003774|motor activity;GO:0044822|poly(A) RNA binding;GO:0043495|protein anchor;GO:0019904|protein domain specific binding…	K10352	MYH; myosin heavy chain
ENSDARG00000008263	5	209.6459316	267.9583031	139.5503225	90.92538651	48.24697377	79.05384656	136.6202501	90.24853893	164.0648934	128.6738552	141.4599234	51.51478987	142.8256681	79.34714613	142.004731	mfsd4b	protein_coding	chr23:18176737-18188547:+	gi|167555188|ref|NP_001107888.1|	2532	0	major facilitator superfamily domain-containing protein 4-B [Danio rerio]	gi|167555187|ref|NM_001114416.1|	1928	0	Danio rerio major facilitator superfamily domain containing 4b (mfsd4b), mRNA	A9JTG4	979	0	Major facilitator superfamily domain-containing protein 4B	.	.	.	.	pfam07690	MFS_1	Major Facilitator Superfamily.	.	GO:0016021|integral component of membrane;	GO:0005355|glucose transmembrane transporter activity;	.	.
ENSDARG00000007207	6	11.70872574	5.316978918	7.294676403	2.435323925	3.154704456	1.600098051	4.314037271	4.577120092	3.471138621	7.547451824	8.499854199	9.609419302	5.977110777	4.90420826	5.573419698	cnpy2	protein_coding	chr11:2473471-2479745:-	gi|86355181|dbj|BAE78825.1|	987	1.00E-131	Canopy2 [Danio rerio]	gi|113205956|ref|NM_001039826.2|	918	0	Danio rerio canopy 2 (cnpy2), mRNA	Q9Y2B0	246	4.00E-79	Protein canopy homolog 2	.	.	.	.	pfam11938	DUF3456	TLR4 regulator and MIR-interacting MSAP. This family of proteins, found from plants to humans, is PRAT4 (A and B), a Protein Associated with Toll-like receptor 4. The Toll family of receptors - TLRs - plays an essential role in innate recognition of microbial products, the first line of defence against bacterial infection. PRAT4A influences the subcellular distribution and the strength of TLR res…	GO:0007167|enzyme linked receptor protein signaling pathway;GO:0010629|negative regulation of gene expression;GO:0045716|positive regulation of low-density lipoprotein particle receptor biosynthetic process;GO:0010988|regulation of low-density lipoprotein particle clearance;GO:0009888|tissue development;	GO:0005783|endoplasmic reticulum;GO:0005887|integral component of plasma membrane;	.	.	.
ENSDARG00000044691	6	20.57036603	2.144613284	13.44985395	1.725600265	6.738125158	1.147451192	2.119991271	2.012218737	2.298693522	11.38295498	2.646680411	3.423574	5.510496268	2.844167783	4.430530193	ppp1r3b	protein_coding	chr21:19879820-19883298:-	gi|528513456|ref|XP_005161204.1|	1451	0	PREDICTED: protein phosphatase 1 regulatory subunit 3B isoform X1 [Danio rerio]	gi|158254164|gb|BC154237.1|	1930	0	Danio rerio protein phosphatase 1, regulatory (inhibitor) subunit 3B, mRNA (cDNA clone MGC:174129 IMAGE:8102088), complete cds	Q803M0	164	7.00E-48	Protein phosphatase 1 regulatory subunit 3B	.	.	.	.	pfam03370	CBM_21	Putative phosphatase regulatory subunit. This family consists of several eukaryotic proteins that are thought to be involved in the regulation of glycogen metabolizm. For instance, the mouse PTG protein has been shown to interact with glycogen synthase, phosphorylase kinase, phosphorylase a: these three enzymes have key roles in the regulation of glycogen metabolizm. PTG also binds the catalytic …	GO:0005977|glycogen metabolic process;GO:0005981|regulation of glycogen catabolic process;	GO:0000164|protein phosphatase type 1 complex;	GO:0019888|protein phosphatase regulator activity;	K07189	PPP1R3; protein phosphatase 1 regulatory subunit 3A/B/C/D/E
ENSDARG00000089478	4	12.0519805	0.445891819	77.41424716	2.784513017	20.36454373	0.887700084	0.207422398	3.667860545	0	52.93425391	0.617134014	0.809285844	10.04450037	16.21113286	18.91174367	si:dkey-241l7.4	protein_coding	chr20:54235113-54236501:+	gi|87042204|gb|ABD16187.1|	664	2.00E-84	c-type lectin [Danio rerio]	gi|350536792|ref|NM_001245035.1|	707	0	Danio rerio si:dkey-241l7.2 (si:dkey-241l7.2), mRNA	P81018	92.4	3.00E-21	Ladderlectin	.	.	.	.	pfam00059	Lectin_C	Lectin C-type domain. This family includes both long and short form C-type	.	GO:0005903|brush border;GO:0044194|cytolytic granule;GO:0005737|cytoplasm;GO:0005829|cytosol;GO:0005615|extracellular space;GO:0005886|plasma membrane;	GO:0030246|carbohydrate binding;GO:0008061|chitin binding;	.	.
ENSDARG00000030478	6	5.706156908	3.281976186	4.349431531	1.740363722	2.678334268	1.400120458	2.339660561	2.103677982	2.567080532	3.687553511	3.165915371	2.595080418	2.940489497	2.641418092	3.282030259	zgc:66484	protein_coding	chr9:45097565-45104932:-	gi|528490874|ref|XP_005167974.1|	2690	0	PREDICTED: uncharacterized protein LOC327557 isoform X1 [Danio rerio]	gi|41054166|ref|NM_199827.1|	2100	0	Danio rerio zgc:66484 (zgc:66484), mRNA	Q8C0L6	86.3	2.00E-17	Peroxisomal N(1)-acetyl-spermine/spermidine oxidase	.	.	.	.	pfam01593	Amino_oxidase	Flavin containing amine oxidoreductase. This family consists of various amine oxidases, including maze polyamine oxidase (PAO) and various flavin containing monoamine oxidases (MAO). The aligned region includes the flavin binding site of these enzymes. The family also contains phytoene dehydrogenases and related enzymes. In vertebrates MAO plays an important role regulating the intracellular leve…	GO:0006598|polyamine catabolic process;GO:1901307|positive regulation of spermidine biosynthetic process;GO:0009446|putrescine biosynthetic process;GO:0009447|putrescine catabolic process;GO:0046203|spermidine catabolic process;GO:0046208|spermine catabolic process;	GO:0005782|peroxisomal matrix;	GO:0052899|N(1),N(12)-diacetylspermine:oxygen oxidoreductase (3-acetamidopropanal-forming) activity;GO:0052904|N1-acetylspermidine:oxygen oxidoreductase (3-acetamidopropanal-forming) activity;GO:0052903|N1-acetylspermine:oxygen oxidoreductase (3-acetamidopropanal-forming) activity;GO:0046592|polyamine oxidase activity;GO:0005102|receptor binding;GO:0052902|spermidine:oxygen oxidoreductase (3-amin…	K00308	PAOX; N1-acetylpolyamine oxidase [EC:1.5.3.13]
ENSDARG00000009262	6	7.377805563	9.818849998	7.682082495	4.740629179	5.110019644	7.169172126	6.051472349	4.766182542	4.528216543	10.1056392	13.45175628	13.79136383	4.678234553	6.597632111	8.892666967	FAR2	protein_coding	chr4:2139147-2187307:-	gi|131889958|ref|NP_001076558.1|	2706	0	fatty acyl-CoA reductase 1 [Danio rerio]	gi|131889957|ref|NM_001083089.1|	1548	0	Danio rerio si:dkey-97m3.1 (si:dkey-97m3.1), mRNA	Q7ZXF5	810	0	Fatty acyl-CoA reductase 1	alr5357_2	53.9	1.00E-06	COG3320	pfam07993	NAD_binding_4	Male sterility protein. This family represents the C-terminal region of the male sterility protein in a number of arabidopsis and drosophila. A sequence-related jojoba acyl CoA reductase is also included.	GO:0006629|lipid metabolic process;	GO:0016021|integral component of membrane;GO:0005778|peroxisomal membrane;	GO:0080019|fatty-acyl-CoA reductase (alcohol-forming) activity;	K13356	FAR; fatty acyl-CoA reductase [EC:1.2.1.-]
ENSDARG00000077982	5	26.62493192	33.70002894	38.79344071	361.1393556	443.9794091	571.1543414	45.97009606	59.67953337	55.89800337	42.99964788	43.20759436	31.88861061	39.95990583	40.79714973	54.18857375	elf3	protein_coding	chr22:623782-627441:+	gi|292625836|ref|XP_002666146.1|	1817	0	PREDICTED: ETS-related transcription factor Elf-3 [Danio rerio]	gi|207366989|emb|CU856139.10|	920	0	Zebrafish DNA sequence from clone ZFOS-1687F11 in linkage group 22, complete sequence	Q3UPW2	88.2	1.00E-18	ETS-related transcription factor Elf-3	.	.	.	.	pfam00178	Ets	Ets-domain.	GO:0009653|anatomical structure morphogenesis;GO:0001824|blastocyst development;GO:0030154|cell differentiation;GO:0030855|epithelial cell differentiation;GO:0030198|extracellular matrix organization;GO:0006954|inflammatory response;GO:0060056|mammary gland involution;GO:0045892|negative regulation of transcription, DNA-templated;GO:0045944|positive regulation of transcription from RNA polymerase…	GO:0005737|cytoplasm;GO:0005634|nucleus;	GO:0003677|DNA binding;GO:0000978|RNA polymerase II core promoter proximal region sequence-specific DNA binding;GO:0003713|transcription coactivator activity;GO:0003700|transcription factor activity, sequence-specific DNA binding;GO:0001077|transcriptional activator activity, RNA polymerase II core promoter proximal region sequence-specific binding;	K09429	K09429, ELF3; E74-like factor 3
ENSDARG00000099819	5	64.83517541	60.35777964	54.48781161	197.351453	224.9946829	248.2647645	84.21336349	79.1900641	74.03799707	58.95695842	50.90077989	45.11337026	52.90967351	48.97358829	61.47632276	sb:cb1058	protein_coding	chr7:24762767-24769819:+	gi|292616011|ref|XP_002662872.1|	1050	4.00E-138	PREDICTED: uncharacterized protein sb:cb1058 [Danio rerio]	gi|45379330|emb|AL954715.13|	777	0	Zebrafish DNA sequence from clone DKEY-23I12 in linkage group 7, complete sequence	.	.	.	.	.	.	.	.	pfam14320	Paramyxo_PCT	Phosphoprotein P region PCT disordered. The N-terminal half of the phosphoprotein P of the Paramyxovirinae viruses. The very first 60 residues have been built as the family Soyouz-module, pfam14313. The remaining part of the region, here, is disordered, and is liable to induced folding under the right physiological conditions. The region undergoes an unstructured-to-structured transition upon bin…	.	.	.	.	.
ENSDARG00000099812	4	1.841520641	1.268948383	1.053380016	0.557316994	0.765117072	0.673673472	1.248055156	2.274045087	2.245271308	0.808223044	1.204306786	1.68695996	1.429265122	0.778897741	0.885183456	si:dkey-31f5.11	protein_coding	chr4:18996553-19039885:-	gi|528476591|ref|XP_005164842.1|	4486	0	PREDICTED: proline-rich transmembrane protein 4 [Danio rerio]	gi|38524391|emb|BX649534.9|	3877	0	Zebrafish DNA sequence from clone DKEY-31F5 in linkage group 4, complete sequence	D4A9R4	173	7.00E-43	Proline-rich transmembrane protein 4	.	.	.	.	pfam03706	UPF0104	Uncharacterized protein family (UPF0104). This family of proteins are integral membrane proteins. These proteins are uncharacterized but contain a conserved PG motif. Some members of this family are annotated as dolichol-P-glucose synthetase and contain a pfam00535 domain.	.	GO:0016021|integral component of membrane;	.	.	.
ENSDARG00000099811	5	84.65713264	72.95081146	128.0687401	117.951034	150.2359877	82.86407674	214.9652479	154.595306	261.6778206	98.48659367	105.4233098	85.55751298	134.6789648	134.964682	104.9037801	si:dkey-203a12.7	protein_coding	chr14:15237768-15238635:+	gi|326673572|ref|XP_003199925.1|	401	2.00E-47	PREDICTED: turripeptide OL11-like [Danio rerio]	gi|158254005|gb|BC154050.1|	302	8.00E-156	Danio rerio cDNA clone IMAGE:7037941	P05605	54.3	4.00E-09	Ovomucoid (Fragment)	.	.	.	.	pfam00050	Kazal_1	Kazal-type serine protease inhibitor domain. Usually indicative of serine protease inhibitors. However, kazal-like domains are also seen in the extracellular part of agrins, which are not known to be protease inhibitors. Kazal domains often occur in tandem arrays. Small alpha+beta fold containing three disulphides. Alignment also includes a single domain from transporters in the OATP/PGT family.	.	GO:0005576|extracellular region;	GO:0004867|serine-type endopeptidase inhibitor activity;	.	.
ENSDARG00000026704	6	1.542645335	1.235624476	2.356426974	3.037618502	2.884598037	1.591721282	1.893440903	1.569459812	6.009874195	2.661905896	2.011951727	3.669769286	1.773774969	1.549488907	2.730119144	ftr72	protein_coding	chr15:41794939-41799111:-	gi|319803104|ref|NP_001007388.2|	2808	0	finTRIM family, member 72 [Danio rerio]	gi|319803103|ref|NM_001007387.2|	1785	0	Danio rerio finTRIM family, member 72 (ftr72), mRNA	Q61510	154	4.00E-42	E3 ubiquitin/ISG15 ligase TRIM25	.	.	.	.	pfam13765	PRY	SPRY-associated domain. SPRY and PRY domains occur on PYRIN proteins. Their function is not known.	GO:0043966|histone H3 acetylation;GO:0043967|histone H4 acetylation;GO:0050718|positive regulation of interleukin-1 beta secretion;GO:0045618|positive regulation of keratinocyte differentiation;GO:0048386|positive regulation of retinoic acid receptor signaling pathway;GO:0045893|positive regulation of transcription, DNA-templated;GO:0060416|response to growth hormone;	GO:0005737|cytoplasm;GO:0016605|PML body;	GO:0003677|DNA binding;GO:0019966|interleukin-1 binding;GO:0032089|NACHT domain binding;GO:0008270|zinc ion binding;	K10652	TRIM25, EFP; tripartite motif-containing protein 25 [EC:2.3.2.27]
ENSDARG00000089211	4	1.257799334	1.942435899	3.266977795	0.944900301	0.627309408	0.416078512	1.349670509	0.783744709	1.305165933	2.009769966	4.038297662	2.23943487	0.276941757	3.364427091	2.747581566	si:dkey-53k12.33	protein_coding	chr2:48877018-48959856:+	gi|528472032|ref|XP_005163627.1|	1450	0	PREDICTED: natural killer cell receptor 2B4-like isoform X1 [Danio rerio]	gi|45535735|emb|BX005223.19|	539	0	Zebrafish DNA sequence from clone DKEY-53K12 in linkage group 2, complete sequence	.	.	.	.	.	.	.	.	pfam07679	I-set	Immunoglobulin I-set domain.	.	.	.	.	.
ENSDARG00000069954	4	2.009145353	1.476751587	2.400758295	2.253350141	2.585636745	3.934383434	0.929421057	0.893206446	0.731568933	1.775110042	1.68320317	1.719964666	1.569556131	1.57193225	1.549873147	kcnq5a	protein_coding	chr13:27248407-27490365:-	gi|528498271|ref|XP_684855.4|	4514	0	PREDICTED: potassium voltage-gated channel subfamily KQT member 5 isoform X3 [Danio rerio]	gi|94017383|emb|CR354610.16|	1043	0	Zebrafish DNA sequence from clone DKEY-29L6 in linkage group 13, complete sequence	Q9NR82	136	1.00E-35	Potassium voltage-gated channel subfamily KQT member 5	STM1741	75.1	8.00E-14	COG1226	pfam03520	KCNQ_channel	KCNQ voltage-gated potassium channel. This family matches to the C-terminal tail of KCNQ type potassium channels.	GO:0007268|synaptic transmission;GO:0006461|protein complex assembly;	GO:0030118|clathrin coat;GO:0005886|plasma membrane;GO:0008076|voltage-gated potassium channel complex;	GO:0005251|delayed rectifier potassium channel activity;GO:0005242|inward rectifier potassium channel activity;GO:0005249|voltage-gated potassium channel activity;	K04930	KCNQ5; potassium voltage-gated channel KQT-like subfamily member 5
ENSDARG00000069956	6	12.90454198	6.378820976	13.92935336	2.198228923	5.547067881	2.829718306	3.375880977	3.540877677	3.397321166	8.807685574	3.326707756	4.095579562	4.620601643	4.652001006	4.644394831	pdlim2	protein_coding	chr8:38157294-38284975:-	gi|688568758|ref|XP_009302425.1|	1798	0	PREDICTED: PDZ and LIM domain protein 2 isoform X1 [Danio rerio]	gi|145587680|ref|NM_001042766.2|	2361	0	Danio rerio PDZ and LIM domain 2 (mystique) (pdlim2), mRNA	Q6AYD6	254	2.00E-75	PDZ and LIM domain protein 2	.	.	.	.	pfam00595	PDZ	PDZ domain (Also known as DHR or GLGF). PDZ domains are found in diverse signaling proteins.	.	GO:0015629|actin cytoskeleton;GO:0005737|cytoplasm;GO:0070062|extracellular exosome;GO:0005925|focal adhesion;	GO:0051393|alpha-actinin binding;GO:0031005|filamin binding;GO:0051371|muscle alpha-actinin binding;GO:0032036|myosin heavy chain binding;GO:0008270|zinc ion binding;	.	.
ENSDARG00000069957	6	11.90931176	1.596672195	5.740520217	1.579105991	3.461225385	1.168647718	1.616570732	1.448609816	1.198449215	6.530465855	2.079872934	2.138580889	2.512460797	2.374758505	2.337204657	zgc:162936	protein_coding	chr15:965722-971012:-	gi|126631645|gb|AAI34155.1|	2038	0	Zgc:162936 protein [Danio rerio]	gi|126631644|gb|BC134154.1|	1361	0	Danio rerio zgc:162936, mRNA (cDNA clone MGC:162936 IMAGE:7923306), complete cds	P18729	249	2.00E-76	Gastrula zinc finger protein XlCGF57.1 (Fragment)	SPAC144.09c	107	5.00E-25	COG5048	pfam13465	zf-H2C2_2	Zinc-finger double domain.	GO:0006355|regulation of transcription, DNA-templated;GO:0006351|transcription, DNA-templated;	GO:0005634|nucleus;	GO:0003677|DNA binding;GO:0046872|metal ion binding;	.	.
ENSDARG00000004049	6	8.195893745	4.869483479	1.974374129	2.797341881	3.794893406	1.848926503	2.568798235	5.523168132	3.535924915	7.567205514	7.735463731	7.454755875	5.088883527	8.16333165	9.7581061	marcksa	protein_coding	chr20:3298762-3302235:-	gi|63100560|gb|AAH95101.1|	665	3.00E-81	Zgc:109978 [Danio rerio]	gi|63100559|gb|BC095101.1|	1163	0	Danio rerio zgc:109978, mRNA (cDNA clone MGC:109978 IMAGE:7273879), complete cds	P30009	87.4	7.00E-18	Myristoylated alanine-rich C-kinase substrate	.	.	.	.	pfam02063	MARCKS	MARCKS family.	GO:0007015|actin filament organization;GO:0031584|activation of phospholipase D activity;GO:0007420|brain development;GO:0031589|cell-substrate adhesion;GO:0006886|intracellular protein transport;GO:0061003|positive regulation of dendritic spine morphogenesis;GO:2001275|positive regulation of glucose import in response to insulin stimulus;GO:0010976|positive regulation of neuron projection develo…	GO:0043679|axon terminus;GO:0032059|bleb;GO:0033391|chromatoid body;GO:0005737|cytoplasm;GO:0005829|cytosol;GO:0044307|dendritic branch;GO:0043197|dendritic spine;GO:0030426|growth cone;GO:0005764|lysosome;GO:0016020|membrane;GO:0001520|outer dense fiber;GO:0005886|plasma membrane;GO:0045202|synapse;	GO:0001786|phosphatidylserine binding;GO:0005543|phospholipid binding;	.	.
ENSDARG00000053561	1	21.85432537	26.97645506	17.47374836	39.5755606	29.11164193	25.3653364	39.50100293	50.70888842	47.99539427	46.73780052	50.06499692	56.40975231	37.6570673	49.05134185	43.4673518	ms4a17a.11	protein_coding	chr4:74998757-75012109:+	gi|62955317|ref|NP_001017670.1|	1244	3.00E-167	membrane-spanning 4-domains, subfamily A, member 17A.11 [Danio rerio]	gi|62955316|ref|NM_001017670.1|	936	0	Danio rerio membrane-spanning 4-domains, subfamily A, member 17A.11 (ms4a17a.11), mRNA	Q96JQ5	114	1.00E-27	Membrane-spanning 4-domains subfamily A member 4A	.	.	.	.	pfam04103	CD20	CD20-like family. This family includes the CD20 protein and the beta subunit of the high affinity receptor for IgE Fc. The high affinity receptor for IgE is a tetrameric structure consisting of a single IgE-binding alpha subunit, a single beta subunit, and two disulfide-linked gamma subunits. The alpha subunit of Fc epsilon RI and most Fc receptors are homologous members of the Ig superfamily. By…	.	GO:0016021|integral component of membrane;	.	.	.
ENSDARG00000039325	6	8.478732431	5.243264094	4.697559284	6.764534842	9.34277858	10.43850948	3.34503813	6.70063975	4.740652956	5.327390326	6.220208223	8.527712254	3.163761959	4.159145852	3.235530906	pmepa1	protein_coding	chr6:59814875-60109705:-	gi|50540226|ref|NP_001002580.1|	711	2.00E-90	prostate transmembrane protein, androgen induced 1 [Danio rerio]	gi|50540225|ref|NM_001002580.1|	815	0	Danio rerio prostate transmembrane protein, androgen induced 1 (pmepa1), mRNA	D2KUZ7	171	2.00E-49	Protein TMEPAI	.	.	.	.	pfam06041	DUF924	Bacterial protein of unknown function (DUF924). This family consists of several hypothetical bacterial proteins of unknown function.	GO:0060394|negative regulation of pathway-restricted SMAD protein phosphorylation;GO:0010991|negative regulation of SMAD protein complex assembly;GO:0030512|negative regulation of transforming growth factor beta receptor signaling pathway;	GO:0031901|early endosome membrane;GO:0010008|endosome membrane;GO:0000139|Golgi membrane;GO:0016021|integral component of membrane;	.	.	.
ENSDARG00000104569	1	25.53676046	45.55037791	30.73094166	6.271942104	12.29103101	21.00966972	6.393345672	8.933272841	6.864475457	22.30097236	23.27908188	11.61376178	7.786070037	7.251748054	8.619253281	CABZ01088484.1	protein_coding	chr18:2211054-2233382:+	gi|326675910|ref|XP_002666665.2|	2155	0	PREDICTED: sucrase-isomaltase, intestinal-like, partial [Danio rerio]	.	.	.	.	P07768	263	3.00E-75	Sucrase-isomaltase, intestinal	SPAPB24D3.10c	136	3.00E-33	COG1501	pfam01055	Glyco_hydro_31	Glycosyl hydrolases family 31. Glycosyl hydrolases are key enzymes of carbohydrate metabolizm. Family 31 comprises of enzymes that are, or similar to, alpha- galactosidases.	GO:0005975|carbohydrate metabolic process;	GO:0016324|apical plasma membrane;GO:0016021|integral component of membrane;	GO:0030246|carbohydrate binding;GO:0004574|oligo-1,6-glucosidase activity;GO:0004575|sucrose alpha-glucosidase activity;	K01203	SI; sucrase-isomaltase / oligo-1,6-glucosidase [EC:3.2.1.48 3.2.1.10]
ENSDARG00000104567	6	6.43329811	5.330863422	6.342492234	5.427077586	7.617779512	11.9162452	3.863330055	7.308522972	8.344050311	6.433298877	7.162415532	8.184760387	3.4586492	3.48676739	3.899327372	KDM5A	protein_coding	chrKN150487.1:499-8649:+	gi|688619422|ref|XP_009301239.1|	5581	0	PREDICTED: lysine-specific demethylase 5A, partial [Danio rerio]	gi|573892254|ref|XM_006633820.1|	1330	0	PREDICTED: Lepisosteus oculatus lysine-specific demethylase 5A-like (LOC102690207), mRNA	P29375	1661	0	Lysine-specific demethylase 5A	.	.	.	.	pfam08429	PLU-1	PLU-1-like protein. Sequences in this family bear similarity to the central region of PLU-1. This is a nuclear protein that may have a role in DNA-binding and transcription, and is closely associated with the malignant phenotype of breast cancer. This region is found in various other Jumonji/ARID domain-containing proteins (see pfam02373, pfam01388).	GO:0032922|circadian regulation of gene expression;GO:0034720|histone H3-K4 demethylation;GO:0008584|male gonad development;GO:1901726|negative regulation of histone deacetylase activity;GO:0000122|negative regulation of transcription from RNA polymerase II promoter;GO:0045893|positive regulation of transcription, DNA-templated;GO:0007283|spermatogenesis;GO:0006366|transcription from RNA polymera…	GO:0005737|cytoplasm;GO:0005730|nucleolus;GO:0005654|nucleoplasm;GO:0005634|nucleus;GO:0032993|protein-DNA complex;	GO:0031490|chromatin DNA binding;GO:0003677|DNA binding;GO:0032452|histone demethylase activity;GO:0016706|oxidoreductase activity, acting on paired donors, with incorporation or reduction of molecular oxygen, 2-oxoglutarate as one donor, and incorporation of one atom each of oxygen into both donors;GO:0003713|transcription coactivator activity;GO:0003700|transcription factor activity, sequence-s…	K11446	KDM5, JARID1; histone demethylase JARID1 [EC:1.14.11.-]
ENSDARG00000093704	4	92.90059413	0.20146532	125.0632499	0.903261439	41.18339753	0.066847598	0	0.345256903	0	67.65209928	0.12392752	0.066482914	18.40557915	5.193810214	14.882472	si:dkeyp-46h3.8	protein_coding	chr19:27964236-27966545:-	gi|326676626|ref|XP_003200629.1|	1221	7.00E-167	PREDICTED: L-rhamnose-binding lectin CSL3 [Danio rerio]	gi|594190947|ref|NM_001114887.2|	507	0	Danio rerio si:dkeyp-46h3.2 (si:dkeyp-46h3.2), mRNA	Q9PVW8	67.8	2.00E-11	Rhamnose-binding lectin	.	.	.	.	pfam02140	Gal_Lectin	Galactose binding lectin domain.	.	GO:0005576|extracellular region;	GO:0030246|carbohydrate binding;	.	.
ENSDARG00000098537	4	1.518022545	1.056189149	2.230978382	1.313937973	1.125973588	0.336972041	0.45352971	0.417697309	0.442323342	1.063689423	0.649694459	0.348539057	0.965935848	0.590761529	0.813787661	SPATA22	protein_coding	chr5:61626050-61644616:-	gi|292627407|ref|XP_002666632.1|	1734	0	PREDICTED: spermatogenesis-associated protein 22 isoform X2 [Danio rerio]	gi|440546374|emb|BX322541.13|	3819	0	Zebrafish DNA sequence from clone DKEY-78P10 in linkage group 5, complete sequence	Q5SV06	174	3.00E-45	Spermatogenesis-associated protein 22	.	.	.	.	pfam10242	L_HGMIC_fpl	Lipoma HMGIC fusion partner-like protein. This is a group of proteins expressed from a series of genes referred to as Lipoma HGMIC fusion partner-like. The proteins carry four highly conserved transmembrane domains in this entry. In certain instances, eg in LHFPL5, mutations cause deafness in humans and hypospadias, and LHFPL1 is transcribed in six liver tumor cell lines.	GO:0009566|fertilization;GO:0007276|gamete generation;GO:0000711|meiotic DNA repair synthesis;GO:0051445|regulation of meiotic cell cycle;GO:0061458|reproductive system development;GO:0007129|synapsis;	GO:0005694|chromosome;	.	.	.
ENSDARG00000067630	1	13.73312537	12.03577349	11.09288406	38.74217065	28.17463489	45.20799141	7.307282637	6.430841162	7.200962068	12.27465104	9.12585653	8.207518374	13.34474756	12.72720818	10.44844033	zgc:154075	protein_coding	chr23:20876927-20888141:+	gi|528517634|ref|XP_005162133.1|	2313	0	PREDICTED: uncharacterized protein LOC556929 isoform X1 [Danio rerio]	gi|121582349|ref|NM_001079964.1|	1812	0	Danio rerio zgc:154075 (zgc:154075), mRNA	O34371	88.2	3.00E-17	Putative oxidoreductase YteT	DR1362	241	1.00E-71	COG0673	pfam01408	GFO_IDH_MocA	Oxidoreductase family, NAD-binding Rossmann fold. This family of enzymes utilize NADP or NAD. This family is called the GFO/IDH/MOCA family in swiss-prot.	GO:0055114|oxidation-reduction process;	.	GO:0016491|oxidoreductase activity;	.	.
ENSDARG00000056427	4	1.111647843	0.28770339	0.626924735	0.469894424	1.12821406	1.045308795	0.28105442	0.41415827	0.411164675	0.671898516	0.584018198	1.153535611	0.324051337	0.527751088	0.580854645	auts2a	protein_coding	chr10:27220977-27237406:-	gi|688574407|ref|XP_009303612.1|	3561	0	PREDICTED: autism susceptibility gene 2 protein isoform X2 [Danio rerio]	gi|78038842|emb|AL929319.4|	2473	0	Zebrafish DNA sequence from clone CH211-59F17 in linkage group 10, complete sequence	Q8WXX7	721	0	Autism susceptibility gene 2 protein	.	.	.	.	pfam15336	Auts2	Autism susceptibility gene 2 protein. Auts2, or FBRSL2, Fibrosin-1-like protein 2, is a family of eukaryotic proteins associated both with a susceptibility to autism and with influencing the number of corpora lutea produced by breeding sows.	GO:0098582|innate vocalization behavior;GO:0051571|positive regulation of histone H3-K4 methylation;GO:2000620|positive regulation of histone H4-K16 acetylation;GO:0045944|positive regulation of transcription from RNA polymerase II promoter;GO:0060013|righting reflex;	GO:0005634|nucleus;	GO:0003682|chromatin binding;	.	.
ENSDARG00000076472	4	1.761944791	1.644929382	1.692984995	2.433239368	2.615236725	3.118851638	0.898803128	1.15443235	0.719636618	1.995607959	0.915480348	0.956399713	0.906767667	1.061458443	1.2504344	ovol1	protein_coding	chr7:19583601-19596069:+	gi|688563751|ref|XP_009301358.1|	1561	0	PREDICTED: putative transcription factor Ovo-like 1 isoform X1 [Danio rerio]	gi|168229189|ref|NM_001114744.1|	2406	0	Danio rerio ovo-like zinc finger 1 (ovol1), mRNA	O14753	256	8.00E-77	Putative transcription factor Ovo-like 1	.	.	.	.	pfam13465	zf-H2C2_2	Zinc-finger double domain.	GO:0008544|epidermis development;GO:0051729|germline cell cycle switching, mitotic to meiotic cell cycle;GO:0001822|kidney development;GO:0007498|mesoderm development;GO:1901994|negative regulation of meiotic cell cycle phase transition;GO:2000647|negative regulation of stem cell proliferation;GO:0043588|skin development;GO:0007283|spermatogenesis;GO:0006366|transcription from RNA polymerase II p…	GO:0005634|nucleus;	GO:0046872|metal ion binding;GO:0000978|RNA polymerase II core promoter proximal region sequence-specific DNA binding;GO:0000981|RNA polymerase II transcription factor activity, sequence-specific DNA binding;GO:0001078|transcriptional repressor activity, RNA polymerase II core promoter proximal region sequence-specific binding;	K09216	OVOL; ovo
ENSDARG00000006151	3	0.707910539	0.018066831	0.748967808	0.260363217	0.085359216	0.089920507	0.168088546	0.185769881	0.055328133	0.26850108	0.366744307	0.16097391	0.254367037	0.30453929	0.475033282	pde11al	protein_coding	chr16:21338649-21379959:-	gi|326674854|ref|XP_697567.3|	4899	0	PREDICTED: dual 3',5'-cyclic-AMP and -GMP phosphodiesterase 11A [Danio rerio]	gi|597742809|ref|XM_007233441.1|	1264	0	PREDICTED: Astyanax mexicanus dual 3',5'-cyclic-AMP and -GMP phosphodiesterase 11A-like (LOC103024879), mRNA	P0C1Q2	88.2	2.00E-16	Dual 3',5'-cyclic-AMP and -GMP phosphodiesterase 11A	.	.	.	.	pfam00233	PDEase_I	3'5'-cyclic nucleotide phosphodiesterase.	GO:0006198|cAMP catabolic process;GO:0046069|cGMP catabolic process;GO:0007165|signal transduction;	GO:0005829|cytosol;GO:0043204|perikaryon;	GO:0004115|3',5'-cyclic-AMP phosphodiesterase activity;GO:0047555|3',5'-cyclic-GMP phosphodiesterase activity;GO:0004114|3',5'-cyclic-nucleotide phosphodiesterase activity;GO:0030552|cAMP binding;GO:0030553|cGMP binding;GO:0004118|cGMP-stimulated cyclic-nucleotide phosphodiesterase activity;GO:0004112|cyclic-nucleotide phosphodiesterase activity;GO:0046872|metal ion binding;	K13298	PDE11; dual 3',5'-cyclic-AMP and -GMP phosphodiesterase 11 [EC:3.1.4.17 3.1.4.35]
ENSDARG00000076476	2	27.29826148	0.020848531	20.45472902	0.160240334	10.57908684	0.041506128	0	0.10718618	0	9.538690476	0.0961843	0	2.113424865	2.129242466	3.328192316	zgc:173770	protein_coding	chr4:75550814-75558338:-	gi|326667444|ref|XP_002661910.2|	2535	0	PREDICTED: signaling mucin HKR1-like isoform X6 [Danio rerio]	gi|238908445|emb|CU467646.17|	2447	0	Zebrafish DNA sequence from clone DKEY-172K15 in linkage group 4, complete sequence	.	.	.	.	.	.	.	.	pfam05109	Herpes_BLLF1	Herpes virus major outer envelope glycoprotein (BLLF1). This family consists of the BLLF1 viral late glycoprotein, also termed gp350/220. It is the most abundantly expressed glycoprotein in the viral envelope of the Herpesviruses and is the major antigen responsible for stimulating the production of neutralizing antibodies in vivo.	.	.	.	.	.
ENSDARG00000012140	1	24.25671402	21.02134446	24.69177051	68.18935874	72.34799843	95.62810057	27.98840692	33.67577554	31.78891745	28.88251847	25.63539113	25.36474429	21.43636458	22.14348403	22.15877164	ccnl1b	protein_coding	chr2:36681716-36691548:-	gi|41054323|ref|NP_956034.1|	2076	0	cyclin-L1 [Danio rerio]	gi|41054322|ref|NM_199740.1|	1916	0	Danio rerio cyclin L1b (ccnl1b), mRNA	Q7ZVX0	345	4.00E-115	Cyclin-L1	SPAC1296.05c	131	3.00E-33	COG5333	pfam00134	Cyclin_N	Cyclin, N-terminal domain. Cyclins regulate cyclin dependent kinases (CDKs). Human cyclin-O is a Uracil-DNA glycosylase that is related to other cyclins. Cyclins contain two domains of similar all-alpha fold, of which this family corresponds with the N-terminal domain.	GO:0045737|positive regulation of cyclin-dependent protein serine/threonine kinase activity;GO:1901409|positive regulation of phosphorylation of RNA polymerase II C-terminal domain;GO:0045944|positive regulation of transcription from RNA polymerase II promoter;GO:0006396|RNA processing;GO:0006351|transcription, DNA-templated;	GO:0000307|cyclin-dependent protein kinase holoenzyme complex;GO:0016607|nuclear speck;GO:0005634|nucleus;	GO:0016538|cyclin-dependent protein serine/threonine kinase regulator activity;	.	.
ENSDARG00000071294	6	5.130259154	2.795518844	4.037539226	1.60182694	2.866628137	1.235377016	0.886394996	1.508122942	1.76595417	2.608252633	2.510013259	2.56896928	1.553170329	1.553745932	2.236635378	tonsl	protein_coding	chr17:8642481-8696866:+	gi|162287310|ref|NP_001104618.1|	6694	0	tonsoku-like protein [Danio rerio]	gi|162287309|ref|NM_001111148.1|	4701	0	Danio rerio tonsoku-like, DNA repair protein (tonsl), mRNA	A9JR78	127	6.00E-31	Tonsoku-like protein	.	.	.	.	pfam12796	Ank_2	Ankyrin repeats (3 copies).	GO:0000724|double-strand break repair via homologous recombination;GO:0031297|replication fork processing;	GO:0005737|cytoplasm;GO:0043596|nuclear replication fork;	GO:0042393|histone binding;	K09257	NFKBIL2; NF-kappa-B inhibitor-like protein 2
ENSDARG00000028048	6	8.177782454	11.9919726	11.60604362	6.649570815	4.896345839	6.263272396	5.371880686	5.480263408	4.080488461	8.408052463	7.035120789	3.920670993	6.357469718	8.037151644	6.047542007	rdh8a	protein_coding	chr3:53432982-53467519:-	gi|32250711|gb|AAP74566.1|	1698	0	photoreceptor associated retinol dehydrogenase type 2 [Danio rerio]	gi|32250710|gb|AY306007.1|	1578	0	Danio rerio photoreceptor associated retinol dehydrogenase type 2 mRNA, complete cds	Q9N126	381	3.00E-127	Retinol dehydrogenase 8	L142816	133	2.00E-34	COG1028	pfam00106	adh_short	short chain dehydrogenase. This family contains a wide variety of dehydrogenases.	GO:0006703|estrogen biosynthetic process;GO:0050896|response to stimulus;GO:0001523|retinoid metabolic process;GO:0007601|visual perception;	GO:0005737|cytoplasm;GO:0016021|integral component of membrane;GO:0001750|photoreceptor outer segment;	GO:0004303|estradiol 17-beta-dehydrogenase activity;GO:0052650|NADP-retinol dehydrogenase activity;GO:0004745|retinol dehydrogenase activity;	K11150	RDH8; retinol dehydrogenase 8 [EC:1.1.1.-]
ENSDARG00000068575	6	8.014621807	1.633168024	5.451620407	0.990980034	3.898674135	1.568647867	1.732708522	1.856050916	1.462408821	5.079354283	2.035661009	2.637970688	3.388551969	2.755752291	2.798165385	tmem51a	protein_coding	chr8:26681899-26690820:-	gi|118150436|ref|NP_001071198.1|	1009	2.00E-129	transmembrane protein 51a [Danio rerio]	gi|118150435|ref|NM_001077730.1|	2027	0	Danio rerio transmembrane protein 51a (tmem51a), mRNA	Q99LG1	85.9	4.00E-17	Transmembrane protein 51	.	.	.	.	pfam15345	TMEM51	Transmembrane protein 51. This family of proteins is found in eukaryotes. Proteins in this family are typically between 233 and 253 amino acids in length.	.	GO:0016021|integral component of membrane;	.	.	.
ENSDARG00000090052	4	1.326264734	0.584894532	3.730313885	2.154073601	1.278079105	1.977109348	1.19036943	0.864527353	0.758767883	1.112425146	1.045629899	0.953003333	1.463975762	0.604113803	0.606451705	si:dkey-165a24.9	protein_coding	chr7:22431067-22442080:+	gi|528484832|ref|XP_005172366.1|	1517	0	PREDICTED: probable G-protein coupled receptor 132 [Danio rerio]	gi|589058096|emb|BX470211.11|	4059	0	Zebrafish DNA sequence from clone DKEY-165A24 in linkage group 7, complete sequence	Q9UNW8	115	1.00E-25	Probable G-protein coupled receptor 132	.	.	.	.	pfam00001	7tm_1	7 transmembrane receptor (rhodopsin family). This family contains, amongst other G-protein-coupled receptors (GCPRs), members of the opsin family, which have been considered to be typical members of the rhodopsin superfamily. They share several motifs, mainly the seven transmembrane helices, GCPRs of the rhodopsin superfamily. All opsins bind a chromophore, such as 11-cis-retinal. The function of…	GO:0000082|G1/S transition of mitotic cell cycle;GO:0010972|negative regulation of G2/M transition of mitotic cell cycle;	GO:0016021|integral component of membrane;GO:0005886|plasma membrane;	GO:0004930|G-protein coupled receptor activity;	K08426	GPR132; G protein-coupled receptor 132
ENSDARG00000025757	5	162.6611086	119.3915545	130.8163136	296.9933065	201.3145064	245.5749621	200.2232855	136.8708247	169.2328284	227.3654037	199.6557474	156.5822186	184.0319062	175.8443945	207.6767799	tspan35	protein_coding	chr3:14461499-14488599:+	gi|612407813|ref|NP_956702.2|	908	1.00E-115	zgc:64085 [Danio rerio]	gi|612407812|ref|NM_200408.2|	1655	0	Danio rerio tetraspanin 35 (tspan35), mRNA	Q99J59	141	8.00E-37	Tetraspanin-1	.	.	.	.	pfam00335	Tetraspannin	Tetraspanin family.	GO:0016477|cell migration;GO:0008283|cell proliferation;GO:0007166|cell surface receptor signaling pathway;GO:0045807|positive regulation of endocytosis;GO:0050821|protein stabilization;	GO:0005737|cytoplasm;GO:0070062|extracellular exosome;GO:0005887|integral component of plasma membrane;GO:0005765|lysosomal membrane;GO:0016020|membrane;GO:0048471|perinuclear region of cytoplasm;GO:0005886|plasma membrane;GO:0031982|vesicle;	.	K17348	TSPAN1; tetraspanin-1
ENSDARG00000078529	3	0.065766594	0.020141425	0.032114268	0.106428827	0.171289656	0.521279091	2.951392008	8.522232138	2.518657224	0.064142735	0.065045456	0.039879637	0	0.029956694	0.028370402	adgrb1b	protein_coding	chr19:92480-107192:-	gi|597756289|ref|XP_007239905.1|	4970	0	PREDICTED: brain-specific angiogenesis inhibitor 1-like [Astyanax mexicanus]	gi|189233028|emb|CU634003.6|	1637	0	Zebrafish DNA sequence from clone CH1073-436C4 in linkage group 19, complete sequence	O14514	434	2.00E-138	Brain-specific angiogenesis inhibitor 1	.	.	.	.	pfam00002	7tm_2	7 transmembrane receptor (Secretin family). This family is known as Family B, the secretin-receptor family or family 2 of the G-protein-coupled receptors (GCPRs).They have been described in many animal species, but not in plants, fungi or prokaryotes. Three distinct sub-families are recognized. Subfamily B1 contains classical hormone receptors, such as receptors for secretin and glucagon, that ar…	GO:0007409|axonogenesis;GO:0007155|cell adhesion;GO:0007166|cell surface receptor signaling pathway;GO:0007186|G-protein coupled receptor signaling pathway;GO:0016525|negative regulation of angiogenesis;GO:0008285|negative regulation of cell proliferation;GO:0007422|peripheral nervous system development;GO:0051965|positive regulation of synapse assembly;GO:0007165|signal transduction;	GO:0005911|cell-cell junction;GO:0016021|integral component of membrane;GO:0005887|integral component of plasma membrane;GO:0005886|plasma membrane;GO:0014069|postsynaptic density;	GO:0004930|G-protein coupled receptor activity;	K04596	BAI1; brain-specific angiogenesis inhibitor 1
ENSDARG00000102436	4	1.551915375	1.932820215	1.237757403	1.354652886	1.377266195	1.569139194	0.685394671	0.773781891	0.849050873	0.739980588	1.249845882	1.497842001	0.669162716	0.447701881	0.714096482	si:ch211-194b1.1	protein_coding	chr3:13487537-13534551:+	gi|528472561|ref|XP_001341794.5|	8841	0	PREDICTED: protein Wiz isoform X2 [Danio rerio]	gi|58578302|emb|BX088715.9|	2362	0	Zebrafish DNA sequence from clone CH211-194B1 in linkage group 3, complete sequence	O95785	78.2	1.00E-12	Protein Wiz	.	.	.	.	pfam13894	zf-C2H2_4	C2H2-type zinc finger. This family contains a number of divergent C2H2 type zinc fingers.	GO:0010571|positive regulation of nuclear cell cycle DNA replication;GO:0070208|protein heterotrimerization;GO:0050821|protein stabilization;	GO:0070062|extracellular exosome;GO:0005634|nucleus;	GO:0046872|metal ion binding;	.	.
ENSDARG00000042690	6	2.573900917	2.758955631	1.945129687	3.786631712	2.10157147	2.634227355	6.469515179	15.7474727	8.046730441	7.949435671	5.506976486	7.218540694	8.402980459	5.387513606	8.618273428	s1pr1	protein_coding	chr22:16012225-16015973:-	gi|12018162|gb|AAG45430.1|AF321294_1	1742	0	sphingosine 1-phosphate receptor [Danio rerio]	gi|50355953|ref|NM_131691.2|	2334	0	Danio rerio sphingosine-1-phosphate receptor 1 (s1pr1), mRNA	Q9DDK4	674	0	Sphingosine 1-phosphate receptor 1	.	.	.	.	pfam00001	7tm_1	7 transmembrane receptor (rhodopsin family). This family contains, amongst other G-protein-coupled receptors (GCPRs), members of the opsin family, which have been considered to be typical members of the rhodopsin superfamily. They share several motifs, mainly the seven transmembrane helices, GCPRs of the rhodopsin superfamily. All opsins bind a chromophore, such as 11-cis-retinal. The function of…	GO:0042074|cell migration involved in gastrulation;GO:0006935|chemotaxis;GO:0007186|G-protein coupled receptor signaling pathway;GO:0008078|mesodermal cell migration;GO:0016525|negative regulation of angiogenesis;GO:0030335|positive regulation of cell migration;GO:0060312|regulation of blood vessel remodeling;GO:0003376|sphingosine-1-phosphate signaling pathway;GO:0002040|sprouting angiogenesis;G…	GO:0016021|integral component of membrane;GO:0031226|intrinsic component of plasma membrane;	GO:0038036|sphingosine-1-phosphate receptor activity;	K04288	S1PR1, EDG1; sphingosine 1-phosphate receptor 1
ENSDARG00000018726	6	5.550528122	5.878018158	5.877201678	6.317704146	5.706472896	8.73657727	3.695767706	8.583027842	6.79487185	9.117437793	13.67050654	16.2618232	5.542389999	5.934772859	6.275815733	slco3a1	protein_coding	chr18:25087452-25190698:-	gi|113681162|ref|NP_001038653.1|	3588	0	solute carrier organic anion transporter family member 3A1 [Danio rerio]	gi|170650726|ref|NM_001045188.2|	2106	0	Danio rerio solute carrier organic anion transporter family, member 3A1 (slco3a1), mRNA	Q8R3L5	999	0	Solute carrier organic anion transporter family member 3A1	.	.	.	.	pfam03137	OATP	Organic Anion Transporter Polypeptide (OATP) family. This family consists of several eukaryotic Organic-Anion-Transporting Polypeptides (OATPs). Several have been identified mostly in human and rat. Different OATPs vary in tissue distribution and substrate specificity. Since the numbering of different OATPs in particular species was based originally on the order of discovery, similarly numbered O…	GO:0006857|oligopeptide transport;GO:0015711|organic anion transport;GO:0015732|prostaglandin transport;GO:0043252|sodium-independent organic anion transport;	GO:0016324|apical plasma membrane;GO:0009925|basal plasma membrane;GO:0009986|cell surface;GO:0005887|integral component of plasma membrane;	GO:0015198|oligopeptide transporter activity;GO:0008514|organic anion transmembrane transporter activity;GO:0015347|sodium-independent organic anion transmembrane transporter activity;	K14353	SLCO3A; solute carrier organic anion transporter family, member 3A
ENSDARG00000095666	6	2.801524807	4.890510272	1.846804451	1.607386523	1.276904184	1.02486657	5.926958961	10.38803871	19.04940268	4.098527521	8.134294109	10.51127823	5.073497636	4.274918272	6.526019493	si:ch73-106k19.4	antisense	chr11:42450453-42453099:-	gi|292619126|ref|XP_002663877.1|	288	3.00E-27	PREDICTED: uncharacterized protein si:ch73-106k19.5 [Danio rerio]	gi|148746841|emb|CU459094.5|	596	0	Zebrafish DNA sequence from clone CH73-106K19 in linkage group 11, complete sequence	.	.	.	.	.	.	.	.	pfam14967	FAM70	FAM70 protein. This family of proteins is found in eukaryotes. Proteins in this family are typically between 241 and 349 amino acids in length. The function of this family is unknown.	.	.	.	.	.
ENSDARG00000042698	6	1.950918529	2.354777417	2.68982559	1.688307133	1.261993414	1.819219759	4.741319306	3.939080727	5.776219877	4.290510034	3.599620852	5.393091171	3.265862133	5.122769612	2.904301905	si:dkey-15j16.6	protein_coding	chr20:23948280-23953074:-	gi|688602021|ref|XP_009292959.1|	1912	0	PREDICTED: uncharacterized protein LOC100536356 isoform X2 [Danio rerio]	gi|37693383|emb|BX255904.6|	481	0	Zebrafish DNA sequence from clone DKEY-15J16 in linkage group 20, complete sequence	.	.	.	.	.	.	.	.	pfam07686	V-set	Immunoglobulin V-set domain. This domain is found in antibodies as well as neural protein P0 and CTL4 amongst others.	.	.	.	.	.
ENSDARG00000035952	4	2.233261996	1.624381882	1.226831362	1.232060932	1.736886454	0.893574149	0.755638859	0.923032853	1.527268399	1.36132499	1.696022918	0.931018317	0.561720364	0.93248027	0.682397598	cdr2a	protein_coding	chr3:58375897-58400508:-	gi|326666298|ref|XP_001921432.2|	1731	0	PREDICTED: cerebellar degeneration-related protein 2-like [Danio rerio]	gi|25955740|emb|AL772300.10|	618	0	Zebrafish DNA sequence from clone CH211-165G14 in linkage group 3, complete sequence	Q5ZJA3	137	5.00E-34	Cerebellar degeneration-related protein 2	.	.	.	.	pfam14662	CCDC155	Coiled-coil region of CCDC155. This is a small family of eukaryotic proteins of unknown function.ThiS is the central coiled-coil region.	.	GO:0005737|cytoplasm;	.	.	.
ENSDARG00000039987	6	4.424094561	4.158007399	4.115222919	10.62070743	9.136219242	16.39004609	4.569033037	6.426830267	6.577637318	5.163682731	5.595008892	7.711629993	3.496230596	3.554637958	4.142310842	hivep2a	protein_coding	chr20:37608576-37726205:-	gi|71834474|ref|NP_001025335.1|	10692	0	transcription factor HIVEP2 [Danio rerio]	gi|71834473|ref|NM_001030164.1|	7989	0	Danio rerio human immunodeficiency virus type I enhancer binding protein 2a (hivep2a), mRNA	Q00900	82.4	1.00E-13	Human immunodeficiency virus type I enhancer-binding protein 2 homolog	.	.	.	.	pfam13465	zf-H2C2_2	Zinc-finger double domain.	GO:0007275|multicellular organismal development;GO:0006355|regulation of transcription, DNA-templated;GO:0007165|signal transduction;GO:0006366|transcription from RNA polymerase II promoter;	GO:0005634|nucleus;	GO:0046872|metal ion binding;GO:0043565|sequence-specific DNA binding;GO:0003700|transcription factor activity, sequence-specific DNA binding;GO:0044212|transcription regulatory region DNA binding;	K09239	HIVEP; human immunodeficiency virus type I enhancer-binding protein
ENSDARG00000035957	5	103.3041462	18.89432319	104.3497076	60.8452744	99.3977018	88.46759013	20.48221798	16.25381772	23.92748062	75.54707438	11.89374059	12.49252102	43.93825693	28.11867502	39.72159016	gmnn	protein_coding	chr19:31998028-32140417:+	gi|94732374|emb|CAK05004.1|	1066	6.00E-143	geminin, DNA replication inhibitor [Danio rerio]	gi|28981338|gb|BC049069.1|	959	0	Danio rerio, clone IMAGE:6034123, mRNA	O75496	141	3.00E-39	Geminin	.	.	.	.	pfam07412	Geminin	Geminin. This family contains the eukaryotic protein geminin (approximately 200 residues long). Geminin inhibits DNA replication by preventing the incorporation of MCM complex into prereplication complex, and is degraded during the mitotic phase of the cell cycle. It has been proposed that geminin inhibits DNA replication during S, G2, and M phases and that geminin destruction at the metaphase-an…	GO:0009887|organ morphogenesis;GO:0007049|cell cycle;GO:0045786|negative regulation of cell cycle;GO:0008156|negative regulation of DNA replication;GO:0045892|negative regulation of transcription, DNA-templated;GO:0006461|protein complex assembly;	GO:0005737|cytoplasm;GO:0005829|cytosol;GO:0005654|nucleoplasm;GO:0005634|nucleus;	GO:0042826|histone deacetylase binding;GO:0003714|transcription corepressor activity;	K10749	GMNN; geminin
ENSDARG00000009511	4	0.618915106	0.18954657	0.470120599	0.303508649	0.597025811	2.075464821	0.764177365	2.208853518	1.289933887	4.292503633	6.704265987	2.877289173	0.593037653	1.69149559	1.305273089	tnfa	protein_coding	chr19:27435209-27439796:+	gi|94732196|emb|CAK04055.1|	1156	1.00E-156	tumor necrosis factor, alpha [Danio rerio]	gi|115432018|ref|NM_212859.2|	1025	0	Danio rerio tumor necrosis factor a (TNF superfamily, member 2) (tnfa), mRNA	Q8JFG3	136	7.00E-36	Tumor necrosis factor	.	.	.	.	pfam00229	TNF	TNF(tumor Necrosis Factor) family.	GO:0006955|immune response;	GO:0005615|extracellular space;GO:0016021|integral component of membrane;	.	.	.
ENSDARG00000078347	4	7.077766248	3.654874556	3.128167538	0.63843425	1.166147621	1.937190668	3.135423733	1.220155222	2.035044086	2.267411193	4.598643785	1.409723727	0.668283291	1.411937378	1.158881757	CU695177.1	protein_coding	chr16:44363615-44369056:-	gi|528504877|ref|XP_005170804.1|	1857	0	PREDICTED: dendritic cell-specific transmembrane protein [Danio rerio]	gi|215414731|emb|CU695177.10|	937	0	Zebrafish DNA sequence from clone CH73-367J22 in linkage group 16, complete sequence	Q7TNJ0	152	5.00E-39	Dendritic cell-specific transmembrane protein	.	.	.	.	pfam07782	DC_STAMP	DC-STAMP-like protein. This is a family of sequences which are similar to a region of the dendritic cell-specific transmembrane protein (DC-STAMP). This is thought to be a novel receptor protein that shares no identity with other multimembrane-spanning proteins. It is thought to have seven putative transmembrane regions, two of which are found in the region featured in this family. DC-STAMP is al…	GO:0071353|cellular response to interleukin-4;GO:0036006|cellular response to macrophage colony-stimulating factor stimulus;GO:0071356|cellular response to tumor necrosis factor;GO:0061025|membrane fusion;GO:0043011|myeloid dendritic cell differentiation;GO:0030308|negative regulation of cell growth;GO:0030316|osteoclast differentiation;GO:0072675|osteoclast fusion;GO:0045780|positive regulation …	GO:0009986|cell surface;GO:0005789|endoplasmic reticulum membrane;GO:0033116|endoplasmic reticulum-Golgi intermediate compartment membrane;GO:0010008|endosome membrane;GO:0030176|integral component of endoplasmic reticulum membrane;GO:0016021|integral component of membrane;GO:0005887|integral component of plasma membrane;	.	.	.
ENSDARG00000036987	3	0.156196848	0.114806996	0.137289538	0.055149903	0.027121069	0.271418052	0.04005491	0.059024414	0.087896665	0.3960844	1.178493238	0.340973489	0.18857929	0.213443069	0.094332303	has2	protein_coding	chr16:15479514-15497339:-	gi|24119268|ref|NP_705936.1|	2960	0	hyaluronan synthase 2 [Danio rerio]	gi|589268279|emb|BX936449.11|	3364	0	Zebrafish DNA sequence from clone CH211-221N14 in linkage group 16, complete sequence	P70312	978	0	Hyaluronan synthase 2	SPy2200	153	3.00E-38	COG1215	pfam03142	Chitin_synth_2	Chitin synthase. Members of this family are fungal chitin synthase EC:2.4.1.16 enzymes. They catalyse chitin synthesis as follows: UDP-N-acetyl-D-glucosamine + {(1,4)-(N-acetyl-beta-D-glucosaminyl)}(N) <=> UDP + {(1,4)-(N-acetyl-beta-D-glucosaminyl)}(N+1).	GO:0036302|atrioventricular canal development;GO:0060349|bone morphogenesis;GO:0007155|cell adhesion;GO:0071498|cellular response to fluid shear stress;GO:0071347|cellular response to interleukin-1;GO:0036120|cellular response to platelet-derived growth factor stimulus;GO:0071356|cellular response to tumor necrosis factor;GO:0090500|endocardial cushion to mesenchymal transition;GO:0044849|estrous…	GO:0005737|cytoplasm;GO:0005887|integral component of plasma membrane;	GO:0050501|hyaluronan synthase activity;	K00752	E2.4.1.212, hasA; hyaluronan synthase [EC:2.4.1.212]
ENSDARG00000099379	1	10.34887975	9.422565155	12.29212018	16.04787256	19.34518099	19.0999066	8.447699788	14.44486994	8.219532155	10.27521528	13.12028512	15.43401281	10.05018532	8.663413952	7.319844992	ppp4r1l	protein_coding	chr6:49542625-49549027:-	gi|688561962|ref|XP_009300969.1|	907	2.00E-115	PREDICTED: serine/threonine-protein phosphatase 4 regulatory subunit 1-like [Danio rerio]	gi|60495602|emb|BX323459.20|	203	1.00E-100	Zebrafish DNA sequence from clone DKEYP-27C11 in linkage group 6, complete sequence	Q8VI02	199	1.00E-56	Serine/threonine-protein phosphatase 4 regulatory subunit 1	.	.	.	.	pfam02985	HEAT	HEAT repeat. The HEAT repeat family is related to armadillo/beta-catenin-like repeats (see pfam00514).	GO:0007165|signal transduction;	GO:0030289|protein phosphatase 4 complex;	GO:0030362|protein phosphatase type 4 regulator activity;	K15424	PPP4R1; serine/threonine-protein phosphatase 4 regulatory subunit 1
ENSDARG00000008637	4	1.972452371	1.990704042	1.094501912	2.835851906	1.310263075	3.320868899	0.817475626	0.26821658	0.686716618	0.874431851	0.658719865	0.312606163	0.579880898	0.65341991	0.721956035	mtp	protein_coding	chr1:11419101-11439741:-	gi|134025026|gb|AAI35021.1|	4634	0	Microsomal triglyceride transfer protein [Danio rerio]	gi|47085716|ref|NM_212970.1|	2960	0	Danio rerio microsomal triglyceride transfer protein (mtp), mRNA	O08601	890	0	Microsomal triglyceride transfer protein large subunit	.	.	.	.	pfam01347	Vitellogenin_N	Lipoprotein amino terminal region. This family contains regions from: Vitellogenin, Microsomal triglyceride transfer protein and apolipoprotein B-100. These proteins are all involved in lipid transport. This family contains the LV1n chain from lipovitellin, that contains two structural domains.	GO:0006629|lipid metabolic process;GO:0042158|lipoprotein biosynthetic process;GO:0015914|phospholipid transport;GO:0034377|plasma lipoprotein particle assembly;GO:0034197|triglyceride transport;	GO:0005783|endoplasmic reticulum;GO:0005788|endoplasmic reticulum lumen;GO:0043235|receptor complex;	GO:0008289|lipid binding;GO:0005319|lipid transporter activity;GO:0005548|phospholipid transporter activity;GO:0046982|protein heterodimerization activity;	K14463	MTTP, MTP; microsomal triglyceride transfer protein large subunit
ENSDARG00000105788	6	17.7814303	14.1365219	9.356150644	5.061044923	1.95329049	4.911851072	5.45940765	4.593829116	7.759868147	6.229101445	5.906587788	2.508541618	11.45368915	5.553904732	5.510276726	si:dkey-56p7.10	protein_coding	chr7:48432451-48445438:+	gi|688565290|ref|XP_005166541.2|	1407	0	PREDICTED: proline-rich protein 5-like [Danio rerio]	gi|28971534|emb|AL929208.9|	372	0	Zebrafish DNA sequence from clone DKEY-56P7 in linkage group 7, complete sequence	A1L1K1	224	3.00E-68	Proline-rich protein 5-like	.	.	.	.	pfam08539	HbrB	HbrB-like. HbrB is involved hyphal growth and polarity.	GO:0034599|cellular response to oxidative stress;GO:0001933|negative regulation of protein phosphorylation;GO:0009968|negative regulation of signal transduction;GO:0090316|positive regulation of intracellular protein transport;GO:0061014|positive regulation of mRNA catabolic process;GO:0010762|regulation of fibroblast migration;GO:0038203|TORC2 signaling;	GO:0031932|TORC2 complex;	.	.	.
ENSDARG00000099371	6	4.131494302	2.210137784	1.295794591	5.913062615	7.286056177	14.87724753	1.512218256	1.345184149	2.235885405	2.461877084	8.28516963	3.600904097	2.967513903	1.759057142	4.197348756	cygb1	protein_coding	chr3:6753948-6783800:+	gi|23308615|ref|NP_694484.1|	930	1.00E-116	cytoglobin-1 [Danio rerio]	gi|308517338|emb|FP016106.30|	6190	0	Zebrafish DNA sequence from clone CH73-59F11 in linkage group 3, complete sequence	Q8UUR3	360	2.00E-112	Cytoglobin-1	.	.	.	.	pfam00042	Globin	Globin.	GO:0046686|response to cadmium ion;	GO:0005737|cytoplasm;	GO:0020037|heme binding;GO:0005506|iron ion binding;GO:0098809|nitrite reductase activity;GO:0019825|oxygen binding;GO:0005344|oxygen transporter activity;	.	.
ENSDARG00000099377	4	0.66664629	1.170300307	0.871949574	0.840639746	0.578761989	0.577027049	0.366329746	0.742251016	1.105328879	1.219098684	1.877090476	2.479590867	0.913673736	1.149560512	0.739486186	si:cabz01030277.1	protein_coding	chr7:7673437-7738057:-	gi|528484201|ref|XP_005166412.1|	7085	0	PREDICTED: poly [ADP-ribose] polymerase 14-like [Danio rerio]	gi|58036913|emb|BX004993.16|	1509	0	Zebrafish DNA sequence from clone CH211-163C2 in linkage group 7, complete sequence	Q2EMV9	272	4.00E-72	Poly [ADP-ribose] polymerase 14	PAE1111	53.5	8.00E-07	COG2110	pfam00644	PARP	Poly(ADP-ribose) polymerase catalytic domain. Poly(ADP-ribose) polymerase catalyses the covalent attachment of ADP-ribose units from NAD+ to itself and to a limited number of other DNA binding proteins, which decreases their affinity for DNA. Poly(ADP-ribose) polymerase is a regulatory component induced by DNA damage. The carboxyl-terminal region is the most highly conserved region of the protein…	GO:0006355|regulation of transcription, DNA-templated;GO:0006351|transcription, DNA-templated;	GO:0005737|cytoplasm;GO:0016020|membrane;GO:0005634|nucleus;	GO:0003950|NAD+ ADP-ribosyltransferase activity;GO:0000166|nucleotide binding;	K15261	PARP10_14_15; poly [ADP-ribose] polymerase 10/14/15 [EC:2.4.2.30]
ENSDARG00000105782	4	2.182302993	0.464580416	0.857704726	1.339024567	2.079448838	1.630755537	0.363984947	0.427414787	0.474246004	0.934427951	0.338420979	0.580964431	0.711469988	0.581876704	0.619947753	si:cabz01081777.1	protein_coding	chr7:73086482-73101252:+	gi|528486507|ref|XP_002663080.3|	3497	0	PREDICTED: uncharacterized protein LOC100331748 isoform X1 [Danio rerio]	.	.	.	.	Q18PD9	61.6	2.00E-08	Protein Dok-7	.	.	.	.	pfam02174	IRS	PTB domain (IRS-1 type).	.	GO:0030054|cell junction;GO:0005886|plasma membrane;GO:0045202|synapse;	GO:0008289|lipid binding;	.	.
ENSDARG00000086881	1	8.267050177	4.557303228	4.749242214	157.1068898	128.2608034	234.5603716	30.17869927	41.16319608	38.40277669	12.42639252	13.35707871	16.63131555	8.555108361	7.885698839	11.83152949	CR855274.1	protein_coding	chr11:30791618-30931872:-	gi|688577678|ref|XP_009304421.1|	741	2.00E-96	PREDICTED: immediate early response gene 2 protein [Danio rerio]	gi|145586876|emb|CR855274.12|	721	0	Zebrafish DNA sequence from clone DKEY-69N2 in linkage group 11, complete sequence	.	.	.	.	.	.	.	.	pfam05760	IER	Immediate early response protein (IER). This family consists of several eukaryotic immediate early response (IER) 2 and 5 proteins. The role of IER5 is unclear although it play an important role in mediating the cellular response to mitogenic signals. Again, little is known about the function of IER2 although it is thought to play a role in mediating the cellular responses to a variety of extrace…	.	.	.	.	.
ENSDARG00000019949	4	5.224385306	1.200000177	0.437875764	0.550633814	0.524646323	0.249598117	2.116247074	2.302023985	2.669329243	2.585719662	3.371284435	3.989514335	1.428936817	1.278649268	1.362308776	serpinh1b	protein_coding	chr15:29450292-29454673:-	gi|832626328|ref|NP_001296752.1|	2145	0	serpin H1 precursor [Danio rerio]	gi|47939313|gb|BC071301.1|	1944	0	Danio rerio heat shock protein 47, mRNA (cDNA clone MGC:86594 IMAGE:6905022), complete cds	P13731	133	2.00E-33	Serpin H1	all0778	156	3.00E-40	COG4826	pfam00079	Serpin	Serpin (serine protease inhibitor). Structure is a multi-domain fold containing a bundle of helices and a beta sandwich.	GO:0003433|chondrocyte development involved in endochondral bone morphogenesis;GO:0032964|collagen biosynthetic process;GO:0030199|collagen fibril organization;GO:0051604|protein maturation;	GO:0005783|endoplasmic reticulum;GO:0005788|endoplasmic reticulum lumen;GO:0005793|endoplasmic reticulum-Golgi intermediate compartment;GO:0070062|extracellular exosome;GO:0045121|membrane raft;	GO:0005518|collagen binding;GO:0044822|poly(A) RNA binding;GO:0004867|serine-type endopeptidase inhibitor activity;	K09501	SERPINH1, HSP47; serpin peptidase inhibitor, clade H, member 1
ENSDARG00000090949	6	3.20832549	2.974834584	2.547002451	2.2499511	1.862609654	3.492250681	1.766616819	2.724130245	3.461313791	3.234691347	3.746036335	4.216177006	1.459765058	1.452427184	1.749114227	dlg5b.1	protein_coding	chr12:48888074-48929952:+	gi|688581449|ref|XP_009305277.1|	8997	0	PREDICTED: disks large homolog 5-like isoform X1 [Danio rerio]	gi|571025247|emb|FP103002.4|	601	0	Zebrafish DNA sequence from clone ZFOS-2177F3 in linkage group 12, complete sequence	Q8TDM6	358	6.00E-106	Disks large homolog 5	.	.	.	.	pfam01576	Myosin_tail_1	Myosin tail. The myosin molecule is a multi-subunit complex made up of two heavy chains and four light chains it is a fundamental contractile protein found in all eukaryote cell types. This family consists of the coiled-coil myosin heavy chain tail region. The coiled-coil is composed of the tail from two molecules of myosin. These can then assemble into the macromolecular thick filament. The coil…	GO:0045176|apical protein localization;GO:0060441|epithelial tube branching involved in lung morphogenesis;GO:0045197|establishment or maintenance of epithelial cell apical/basal polarity;GO:0035556|intracellular signal transduction;GO:0072205|metanephric collecting duct development;GO:0030901|midbrain development;GO:0008285|negative regulation of cell proliferation;GO:0030859|polarized epithelia…	GO:0005913|cell-cell adherens junction;GO:0005737|cytoplasm;GO:0005886|plasma membrane;	GO:0008013|beta-catenin binding;GO:0008092|cytoskeletal protein binding;GO:0030159|receptor signaling complex scaffold activity;	.	.
ENSDARG00000063636	1	32.1173366	37.56156531	36.20642563	30.432238	36.50757258	62.78438787	16.39085426	19.62801049	20.70401994	25.41407068	28.38316088	16.59473431	15.06166044	14.80689824	16.67428466	galnt11	protein_coding	chr24:7528842-7558082:-	gi|225007540|ref|NP_001070030.2|	3130	0	polypeptide N-acetylgalactosaminyltransferase 11 [Danio rerio]	gi|225007539|ref|NM_001076562.2|	2390	0	Danio rerio UDP-N-acetyl-alpha-D-galactosamine:polypeptide N-acetylgalactosaminyltransferase 11 (GalNAc-T11) (galnt11), mRNA	Q6DJR8	911	0	Polypeptide N-acetylgalactosaminyltransferase 11	.	.	.	.	pfam00535	Glycos_transf_2	Glycosyl transferase family 2. Diverse family, transferring sugar from UDP-glucose, UDP-N-acetyl- galactosamine, GDP-mannose or CDP-abequose, to a range of substrates including cellulose, dolichol phosphate and teichoic acids.	GO:0060271|cilium morphogenesis;GO:0007368|determination of left/right symmetry;GO:0007220|Notch receptor processing;GO:0061314|Notch signaling involved in heart development;GO:0018243|protein O-linked glycosylation via threonine;GO:0008593|regulation of Notch signaling pathway;	GO:0000139|Golgi membrane;GO:0016021|integral component of membrane;	GO:0030246|carbohydrate binding;GO:0005112|Notch binding;GO:0004653|polypeptide N-acetylgalactosaminyltransferase activity;	K00710	GALNT; polypeptide N-acetylgalactosaminyltransferase [EC:2.4.1.41]
ENSDARG00000063635	3	0.254063075	0.107734686	0.114517568	0.264513151	0.180980363	0.03574712	0.016705537	0.02461707	0.067207619	0.057182294	0.115974113	0.035552103	0.028089282	0.017803965	0.084305971	nrxn1b	protein_coding	chr13:602736-680985:+	gi|589269173|ref|NP_001277105.1|	7511	0	neurexin-1b isoform alpha precursor [Danio rerio]	gi|589269176|ref|NM_001079959.2|	7191	0	Danio rerio neurexin 1b (nrxn1b), transcript variant beta, mRNA	A1XQX2	2888	0	Neurexin-1b	.	.	.	.	pfam02210	Laminin_G_2	Laminin G domain. This family includes the Thrombospondin N-terminal-like domain, a Laminin G subfamily.	GO:0007155|cell adhesion;	GO:0016021|integral component of membrane;GO:0042734|presynaptic membrane;	.	.	.
ENSDARG00000019945	4	2.512110538	2.092510496	1.766037892	0.517689511	0.772238676	1.188967891	0.935806137	1.366679762	3.016132408	1.353742584	2.253924419	4.889961254	0.682785573	1.335719953	1.011991811	ptprdb	protein_coding	chr1:18429983-18544675:-	gi|260447196|ref|NP_001159520.1|	10074	0	protein tyrosine phosphatase, receptor type, D isoform 1 precursor [Danio rerio]	gi|260447195|ref|NM_001166048.1|	5805	0	Danio rerio protein tyrosine phosphatase, receptor type, D, b (ptprdb), transcript variant 1, mRNA	P23468	285	5.00E-85	Receptor-type tyrosine-protein phosphatase delta	SPAC11E3.09	142	3.00E-35	COG5599	pfam00102	Y_phosphatase	Protein-tyrosine phosphatase.	GO:0007157|heterophilic cell-cell adhesion via plasma membrane cell adhesion molecules;GO:0046426|negative regulation of JAK-STAT cascade;GO:0030182|neuron differentiation;GO:0050775|positive regulation of dendrite morphogenesis;GO:0097105|presynaptic membrane assembly;GO:0050776|regulation of immune response;	GO:0016021|integral component of membrane;	GO:0050839|cell adhesion molecule binding;GO:0004725|protein tyrosine phosphatase activity;GO:0005102|receptor binding;	K06777	PTPRD; receptor-type tyrosine-protein phosphatase delta [EC:3.1.3.48]
ENSDARG00000005176	1	117.2933346	69.85798733	53.01022946	10.40549503	10.2342209	19.11195182	28.71820933	13.26258831	7.437691661	37.88852533	41.10938441	14.4263475	44.77597421	35.4879175	28.43104465	zgc:101040	protein_coding	chr18:40489492-40490836:-	gi|57525756|ref|NP_001003588.1|	1559	0	uncharacterized protein LOC445194 [Danio rerio]	gi|35209681|emb|BX323575.10|	1345	0	Zebrafish DNA sequence from clone CH211-278N20 in linkage group 18, complete sequence	P13913	286	7.00E-92	Arylamine N-acetyltransferase, pineal gland isozyme NAT-10	mlr4870	122	2.00E-30	COG2162	pfam00797	Acetyltransf_2	N-acetyltransferase. Arylamine N-acetyltransferase (NAT) is a cytosolic enzyme of approximately 30kDa. It facilitates the transfer of an acetyl group from Acetyl Coenzyme A on to a wide range of arylamine, N-hydroxyarylamines and hydrazines. Acetylation of these compounds generally results in inactivation. NAT is found in many species from Mycobacteria (M. tuberculosis, M. smegmatis etc) to man. …	GO:0008152|metabolic process;	.	GO:0004060|arylamine N-acetyltransferase activity;	K00622	nat; arylamine N-acetyltransferase [EC:2.3.1.5]
ENSDARG00000005172	1	30.54234842	10.83069571	52.9404562	7.331144222	14.11081972	6.207300591	11.37430407	12.99261196	15.49519096	22.90731531	9.539194172	9.909990961	12.39926358	9.92555235	17.10485613	dynll2b	protein_coding	chr21:39512375-39521796:-	gi|829719474|ref|XP_012618327.1|	502	2.00E-60	PREDICTED: dynein light chain 2, cytoplasmic isoform X1 [Microcebus murinus]	gi|402692321|ref|NM_001030000.2|	782	0	Danio rerio dynein, light chain, LC8-type 2b (dynll2b), mRNA	Q78P75	189	4.00E-59	Dynein light chain 2, cytoplasmic	.	.	.	.	pfam01221	Dynein_light	Dynein light chain type 1.	GO:0007017|microtubule-based process;GO:0008039|synaptic target recognition;GO:0006810|transport;	GO:0005813|centrosome;GO:0005737|cytoplasm;GO:0030286|dynein complex;GO:0016020|membrane;GO:0005874|microtubule;GO:0016459|myosin complex;GO:0005634|nucleus;	GO:0008092|cytoskeletal protein binding;GO:0003774|motor activity;	K10418	DYNLL; dynein light chain LC8-type
ENSDARG00000010953	6	5.377258116	3.208087943	6.138119443	10.20189032	8.730461168	10.05920317	4.984468761	5.01398669	7.040889136	4.767715397	5.180158334	5.335640387	5.841650742	5.821163333	6.235921485	ndel1a	protein_coding	chr12:26376487-26396009:+	gi|132424626|gb|ABO33470.1|	1604	0	NudE-like protein 1a [Danio rerio]	gi|41152226|ref|NM_201344.1|	1976	0	Danio rerio nudE neurodevelopment protein 1-like 1a (ndel1a), mRNA	Q7SXI6	64.3	1.00E-09	Nuclear distribution protein nudE-like 1-A	.	.	.	.	pfam04880	NUDE_C	NUDE protein, C-terminal conserved region. This family represents the C-terminal conserved region of the NUDE proteins. NUDE proteins are involved in nuclear migration.	GO:0016477|cell migration;GO:0051642|centrosome localization;GO:0007059|chromosome segregation;GO:0051303|establishment of chromosome localization;GO:0000132|establishment of mitotic spindle orientation;GO:0007020|microtubule nucleation;GO:0007100|mitotic centrosome separation;GO:0060052|neurofilament cytoskeleton organization;GO:2000574|regulation of microtubule motor activity;GO:0010975|regulat…	GO:0005813|centrosome;GO:0005737|cytoplasm;GO:0005871|kinesin complex;GO:0000776|kinetochore;GO:0005874|microtubule;GO:0005819|spindle;	GO:0008017|microtubule binding;	K16739	NDEL1; nuclear distribution protein NudE-like 1
ENSDARG00000005179	5	179.2345147	217.5110971	105.9089635	92.18460761	63.01275235	95.8243165	86.40182447	100.6223587	175.6232261	86.18399522	86.50884276	29.82700583	63.27856858	73.47980656	77.46543382	c17h14orf159	protein_coding	chr17:38792868-38831438:-	gi|189531042|ref|XP_001923890.1|	3157	0	PREDICTED: UPF0317 protein C14orf159 homolog, mitochondrial [Danio rerio]	gi|161611594|gb|BC155801.1|	1946	0	Danio rerio c14orf159 homolog (H. sapiens), mRNA (cDNA clone IMAGE:7066798), partial cds	Q65NA8	154	2.00E-44	UPF0317 protein BLi00500/BL02808	BS_ycsI	213	4.00E-62	COG4336	pfam14336	DUF4392	Domain of unknown function (DUF4392). This family of proteins is found in bacteria, archaea and eukaryotes. Proteins in this family are typically between 282 and 585 amino acids in length. There are two completely conserved G residues that may be functionally important.	GO:0008152|metabolic process;	.	GO:0004060|arylamine N-acetyltransferase activity;	.	.
ENSDARG00000096045	4	1.568271973	1.67010964	0.905033635	0.880925597	0.773594276	0.749737794	2.041294906	1.279533695	1.805141903	2.572423975	2.266182026	2.431459693	2.889284138	2.922333298	2.952093223	si:ch73-263o4.4	protein_coding	chr4:28374990-28382149:+	gi|326666662|ref|XP_002661511.2|	1596	0	PREDICTED: serine racemase-like [Danio rerio]	gi|528476952|ref|XM_002661465.3|	1474	0	PREDICTED: Danio rerio si:ch73-263o4.4 (si:ch73-263o4.4), mRNA	Q7A5L8	123	4.00E-29	L-threonine dehydratase catabolic TdcB	VNG2100G	137	1.00E-33	COG1171	pfam00291	PALP	Pyridoxal-phosphate dependent enzyme. Members of this family are all pyridoxal-phosphate dependent enzymes. This family includes: serine dehydratase EC:4.2.1.13 P20132, threonine dehydratase EC:4.2.1.16, tryptophan synthase beta chain EC:4.2.1.20, threonine synthase EC:4.2.99.2, cysteine synthase EC:4.2.99.8 P11096, cystathionine beta-synthase EC:4.2.1.22, 1-aminocyclopropane-1-carboxylate deamin…	GO:0070689|L-threonine catabolic process to propionate;	.	GO:0004794|L-threonine ammonia-lyase activity;GO:0000166|nucleotide binding;GO:0030170|pyridoxal phosphate binding;	K01754	E4.3.1.19, ilvA, tdcB; threonine dehydratase [EC:4.3.1.19]
ENSDARG00000096046	1	18.71677347	14.62578889	18.75016085	11.66708373	12.64767612	16.32352113	15.3392612	22.9683195	28.41239118	37.1679385	42.28483302	61.60322843	46.25915984	28.82847241	23.72270696	si:ch211-209p16.4	antisense	chr4:44090996-44094214:+	gi|542263027|ref|XP_005466273.1|	234	2.00E-19	PREDICTED: uncharacterized protein LOC102080506 isoform X1 [Oreochromis niloticus]	gi|46917220|emb|BX649307.12|	607	0	Zebrafish DNA sequence from clone CH211-209P16 in linkage group 4, complete sequence	.	.	.	.	.	.	.	.	pfam03188	Cytochrom_B561	Eukaryotic cytochrome b561. Cytochrome b561 is a secretory vesicle-specific electron transport protein. It is an integral membrane protein, that binds two heme groups non-covalently. This is a eukaryotic family. Members of the 'prokaryotic cytochrome b561' family can be found in Pfam: PF01292.	.	.	.	.	.
ENSDARG00000024669	1	16.11406982	12.8233149	17.47202732	39.19963815	48.94574567	33.80683869	15.32880736	14.6637739	16.02546034	16.49994061	13.91159141	13.11812458	13.89629216	15.41199251	15.72706442	oser1	protein_coding	chr6:52717379-52725572:-	gi|41054890|ref|NP_956651.1|	1276	3.00E-170	oxidative stress-responsive serine-rich protein 1 [Danio rerio]	gi|41054889|ref|NM_200357.1|	1576	0	Danio rerio oxidative stress responsive serine-rich 1 (oser1), mRNA	Q5E9A0	179	5.00E-50	Oxidative stress-responsive serine-rich protein 1	.	.	.	.	pfam05604	DUF776	Protein of unknown function (DUF776). This family consists of several highly related mouse and human proteins of unknown function.	GO:0006041|glucosamine metabolic process;GO:0019255|glucose 1-phosphate metabolic process;GO:0030097|hemopoiesis;GO:0006487|protein N-linked glycosylation;GO:0006493|protein O-linked glycosylation;GO:0007283|spermatogenesis;GO:0006048|UDP-N-acetylglucosamine biosynthetic process;	GO:0005829|cytosol;	GO:0000287|magnesium ion binding;GO:0004610|phosphoacetylglucosamine mutase activity;GO:0004614|phosphoglucomutase activity;	.	.
ENSDARG00000028164	3	0.142711338	0.131118683	0.836242807	2.834350074	1.115078704	0.19577742	0.243978029	0.067410556	0.133846605	0.208781427	0.302456769	0.259612488	2.461399843	0.195015113	0.12312567	cst14a.1	protein_coding	chr24:20772332-20773993:+	gi|68423127|ref|XP_698401.1|	527	2.00E-65	PREDICTED: cystatin-A [Danio rerio]	gi|528519817|ref|XM_693309.4|	660	0	PREDICTED: Danio rerio si:ch211-161h7.6 (si:ch211-161h7.6), mRNA	Q862Z5	117	2.00E-31	Cystatin-B	.	.	.	.	pfam00031	Cystatin	Cystatin domain. Very diverse family. Attempts to define separate sub-families failed. Typically, either the N-terminal or C-terminal end is very divergent. But splitting into two domains would make very short families. pfam00666 are related to this family but have not been included.	.	GO:0005737|cytoplasm;GO:0005634|nucleus;	GO:0004869|cysteine-type endopeptidase inhibitor activity;	.	.
ENSDARG00000028163	6	2.388062936	2.702179076	2.356763824	5.990987599	3.186247832	4.505999069	3.137164292	2.256031681	2.758397864	3.554940116	2.471980126	2.903775191	5.722947804	1.854922265	2.168763987	prg4b	protein_coding	chr20:34126941-34136759:+	gi|528511717|ref|XP_005160747.1|	3464	0	PREDICTED: proteoglycan 4 isoform X2 [Danio rerio]	gi|83415099|ref|NM_001037673.1|	1743	0	Danio rerio proteoglycan 4b (prg4b), mRNA	Q92954	55.1	8.00E-08	Proteoglycan 4	.	.	.	.	pfam01033	Somatomedin_B	Somatomedin B domain.	GO:0008283|cell proliferation;GO:0006955|immune response;	GO:0005576|extracellular region;	GO:0030247|polysaccharide binding;GO:0005044|scavenger receptor activity;	.	.
ENSDARG00000019496	1	37.88015172	28.80846376	35.02803227	15.50070327	19.61530929	14.49171536	26.99377705	23.88070378	17.76358414	31.92674488	24.24254378	23.43328399	36.2677653	31.28211905	32.23115387	esd	protein_coding	chr9:25360928-25370828:-	gi|62955565|ref|NP_001017796.1|	1444	0	S-formylglutathione hydrolase [Danio rerio]	gi|62955564|ref|NM_001017796.1|	1158	0	Danio rerio esterase D/formylglutathione hydrolase (esd), mRNA	Q9GJT2	469	4.00E-164	S-formylglutathione hydrolase	PA3628	308	3.00E-100	COG0627	pfam00756	Esterase	Putative esterase. This family contains Esterase D. However it is not clear if all members of the family have the same function. This family is related to the pfam00135 family.	GO:0046294|formaldehyde catabolic process;	GO:0016023|cytoplasmic membrane-bounded vesicle;GO:0070062|extracellular exosome;	GO:0052689|carboxylic ester hydrolase activity;GO:0018738|S-formylglutathione hydrolase activity;	K01070	frmB, ESD, fghA; S-formylglutathione hydrolase [EC:3.1.2.12]
ENSDARG00000019498	6	2.531420114	1.625250206	3.753006759	3.41902557	5.295666952	8.31218617	3.284875574	2.996531859	3.060686128	1.69552077	1.551322914	1.248348244	1.841102083	1.444800923	1.920875089	cry5	protein_coding	chr10:39347036-39362396:-	gi|28279917|gb|AAH44204.1|	2857	0	Cry5 protein, partial [Danio rerio]	gi|28279916|gb|BC044204.1|	2126	0	Danio rerio cryptochrome 5, mRNA (cDNA clone IMAGE:3818769), partial cds	Q49AN0	625	0	Cryptochrome-2	alr2725	202	1.00E-55	COG0415	pfam03441	FAD_binding_7	FAD binding domain of DNA photolyase.	GO:0009785|blue light signaling pathway;GO:0032922|circadian regulation of gene expression;GO:0007623|circadian rhythm;GO:0043153|entrainment of circadian clock by photoperiod;GO:0042593|glucose homeostasis;GO:0042754|negative regulation of circadian rhythm;GO:2000323|negative regulation of glucocorticoid receptor signaling pathway;GO:0032515|negative regulation of phosphoprotein phosphatase acti…	GO:0005737|cytoplasm;GO:0005576|extracellular region;GO:0005634|nucleus;	GO:0009882|blue light photoreceptor activity;GO:0003684|damaged DNA binding;GO:0003677|DNA binding;GO:0071949|FAD binding;GO:0019902|phosphatase binding;GO:0003697|single-stranded DNA binding;GO:0000989|transcription factor activity, transcription factor binding;GO:0000976|transcription regulatory region sequence-specific DNA binding;GO:0043130|ubiquitin binding;	K02295	CRY; cryptochrome
ENSDARG00000061985	5	101.9627635	108.2868158	63.01949683	43.91969409	40.77533632	72.9811858	51.38671309	49.80014208	70.93712835	60.86596612	60.31092495	49.09842693	34.7646787	37.50552579	35.05541847	rbm47	protein_coding	chr1:18660111-18709878:-	gi|167963512|ref|NP_001108158.1|	2663	0	RNA-binding protein 47 [Danio rerio]	gi|229331969|ref|NM_001114686.2|	7222	0	Danio rerio RNA binding motif protein 47 (rbm47), mRNA	Q5YD48	99.8	4.00E-23	APOBEC1 complementation factor	.	.	.	.	pfam00076	RRM_1	RNA recognition motif. (a.k.a. RRM, RBD, or RNP domain). The RRM motif is probably diagnostic of an RNA binding protein. RRMs are found in a variety of RNA binding proteins, including various hnRNP proteins, proteins implicated in regulation of alternative splicing, and protein components of snRNPs. The motif also appears in a few single stranded DNA binding proteins. The RRM structure consists o…	GO:0016554|cytidine to uridine editing;GO:0002244|hematopoietic progenitor cell differentiation;	GO:0005634|nucleus;	GO:0000166|nucleotide binding;GO:0044822|poly(A) RNA binding;	.	.
ENSDARG00000041078	5	38.09960265	36.23643615	46.22564407	147.1189924	143.2707183	310.6928323	62.23288048	50.90518336	73.04779886	40.36440916	40.69418353	26.61028006	31.10314347	26.06111057	29.2516744	chka	protein_coding	chr18:21133752-21156308:+	gi|528507865|ref|XP_005159162.1|	2263	0	PREDICTED: choline kinase alpha isoform X1 [Danio rerio]	gi|113678159|ref|NM_001044865.1|	3279	0	Danio rerio choline kinase alpha (chka), mRNA	P35790	543	0	Choline kinase alpha	SPAC13G7.12c	105	6.00E-23	COG0510	pfam01633	Choline_kinase	Choline/ethanolamine kinase. Choline kinase catalyses the committed step in the synthesis of phosphatidylcholine by the CDP-choline pathway. This alignment covers the protein kinase portion of the protein. The divergence of this family makes it very difficult to create a model that specifically predicts choline/ethanolamine kinases only.	GO:0019695|choline metabolic process;GO:0006580|ethanolamine metabolic process;GO:0006629|lipid metabolic process;GO:0006869|lipid transport;GO:0006656|phosphatidylcholine biosynthetic process;GO:0006646|phosphatidylethanolamine biosynthetic process;GO:1904681|response to 3-methylcholanthrene;GO:0009636|response to toxic substance;	GO:0005829|cytosol;	GO:0005524|ATP binding;GO:0033265|choline binding;GO:0004103|choline kinase activity;GO:0004104|cholinesterase activity;GO:0008144|drug binding;GO:0004305|ethanolamine kinase activity;GO:0004871|signal transducer activity;	K14156	CHK; choline/ethanolamine kinase [EC:2.7.1.32 2.7.1.82]
ENSDARG00000071876	1	9.998042866	24.3043259	13.76484126	17.5279461	21.39860143	6.699121049	7.804417599	8.199019915	6.283891807	6.602360628	7.41630992	2.936584903	12.15464378	17.96343451	21.20537195	rell2	protein_coding	chr14:9150661-9169831:+	gi|94536984|ref|NP_001035391.1|	1819	0	RELT-like protein 2 [Danio rerio]	gi|94536983|ref|NM_001040301.1|	1881	0	Danio rerio RELT-like 2 (rell2), mRNA	Q2KI80	106	7.00E-24	RELT-like protein 2	.	.	.	.	pfam01148	CTP_transf_1	Cytidylyltransferase family. The members of this family are integral membrane protein cytidylyltransferases. The family includes phosphatidate cytidylyltransferase EC:2.7.7.41 as well as Sec59 from yeast. Sec59 is a dolichol kinase EC:2.7.1.108.	GO:0010811|positive regulation of cell-substrate adhesion;	GO:0005604|basement membrane;GO:0016021|integral component of membrane;GO:0005886|plasma membrane;	.	.	.
ENSDARG00000095830	1	12.80440283	19.77052968	11.24577195	13.50012461	17.1377714	11.62909016	26.67879424	25.70500479	16.55412503	19.72969456	42.51486099	42.25909946	31.17102488	43.41903419	28.92199968	serpinb1l1	protein_coding	chr16:51402433-51423833:-	gi|528505148|ref|XP_005168315.1|	1979	0	PREDICTED: serpin peptidase inhibitor, clade B (ovalbumin), member 1, like 1 [Danio rerio]	gi|190339611|gb|BC162929.1|	1319	0	Danio rerio serpin peptidase inhibitor, clade B (ovalbumin), member 1, like 1, mRNA (cDNA clone MGC:194363 IMAGE:9037282), complete cds	P05619	434	3.00E-148	Leukocyte elastase inhibitor	MA2246	211	1.00E-61	COG4826	pfam00079	Serpin	Serpin (serine protease inhibitor). Structure is a multi-domain fold containing a bundle of helices and a beta sandwich.	.	GO:0005737|cytoplasm;GO:0070062|extracellular exosome;GO:0005615|extracellular space;GO:0016020|membrane;	GO:0004867|serine-type endopeptidase inhibitor activity;	K13963	SERPINB; serpin B
ENSDARG00000095832	1	18.4709796	28.7606238	17.72253192	26.77339314	33.59107743	30.11075493	20.27628554	15.06189451	14.77067102	15.73934083	14.17521313	8.017169831	19.39403784	17.77174597	16.38335414	si:ch73-269m23.4	lincRNA	chr23:45076076-45082118:-	.	.	.	.	gi|207999361|emb|CU682777.6|	382	0	Zebrafish DNA sequence from clone CH73-269M23 in linkage group 23, complete sequence	.	.	.	.	.	.	.	.	pfam10430	Ig_Tie2_1	Tie-2 Ig-like domain 1.	.	.	.	.	.
ENSDARG00000075785	6	3.100948589	3.272759371	2.562515884	1.937097741	3.189161179	3.519558466	6.15772658	10.95183542	27.60674836	6.684660404	7.293265817	4.61410788	2.015909282	3.824568238	4.51383815	HERC5	protein_coding	chr1:49970042-49994129:+	gi|326664251|ref|XP_688463.5|	5029	0	PREDICTED: probable E3 ubiquitin-protein ligase HERC4 [Danio rerio]	gi|158327294|emb|CU467858.6|	1454	0	Zebrafish DNA sequence from clone CH73-190M4 in linkage group 1, complete sequence	Q6PAV2	99.8	9.00E-20	Probable E3 ubiquitin-protein ligase HERC4	YJR036c	101	9.00E-21	COG5021	pfam00632	HECT	HECT-domain (ubiquitin-transferase). The name HECT comes from Homologous to the E6-AP Carboxyl Terminus.	GO:0030154|cell differentiation;GO:0016567|protein ubiquitination;GO:0042787|protein ubiquitination involved in ubiquitin-dependent protein catabolic process;GO:0007283|spermatogenesis;	GO:0005737|cytoplasm;GO:0005829|cytosol;GO:0005634|nucleus;	GO:0061630|ubiquitin protein ligase activity;GO:0004842|ubiquitin-protein transferase activity;	K10615	HERC4; E3 ubiquitin-protein ligase HERC4 [EC:2.3.2.26]
ENSDARG00000078772	1	20.68904401	20.35469056	16.0521658	23.89971308	29.17549693	40.97451935	17.14033268	18.25120315	22.032926	19.38598989	18.53816026	13.96514382	12.77344129	13.27611173	13.72735581	NBR1	protein_coding	chr3:32801949-32820336:+	gi|146327515|gb|AAI41800.1|	5184	0	LOC555713 protein [Danio rerio]	gi|146327514|gb|BC141799.1|	3958	0	Danio rerio hypothetical LOC555713, mRNA (cDNA clone IMAGE:3819101), partial cds	Q14596	490	2.00E-150	Next to BRCA1 gene 1 protein	.	.	.	.	pfam00564	PB1	PB1 domain.	GO:0016236|macroautophagy;GO:0045668|negative regulation of osteoblast differentiation;GO:0051259|protein oligomerization;GO:0030500|regulation of bone mineralization;GO:0032872|regulation of stress-activated MAPK cascade;	GO:0005776|autophagosome;GO:0031410|cytoplasmic vesicle;GO:0005829|cytosol;GO:0070062|extracellular exosome;GO:0005770|late endosome;GO:0005764|lysosome;GO:0031430|M band;GO:0016020|membrane;GO:0000407|pre-autophagosomal structure;	GO:0051019|mitogen-activated protein kinase binding;GO:0043130|ubiquitin binding;GO:0008270|zinc ion binding;	K17987	NBR1; next to BRCA1 gene 1 protein
ENSDARG00000003973	6	13.04656511	6.089280784	6.829417182	4.0997623	3.624521653	3.627292959	9.68006237	10.55041096	8.173753412	8.907100451	8.096029645	8.30675368	5.220449052	4.041044524	5.267835069	chordc1a	protein_coding	chr15:43938371-43954698:-	gi|68448475|ref|NP_001020346.1|	1708	0	cysteine and histidine-rich domain-containing protein 1 [Danio rerio]	gi|68448474|ref|NM_001025175.1|	1195	0	Danio rerio cysteine and histidine-rich domain (CHORD) containing 1a (chordc1a), mRNA	Q7T3F7	488	8.00E-170	Cysteine and histidine-rich domain-containing protein 1	.	.	.	.	pfam04968	CHORD	CHORD. CHORD represents a Zn binding domain. Silencing of the C. elegans CHORD-containing gene results in semisterility and embryo lethality, suggesting an essential function of the wild-type gene in nematode development.	GO:0010824|regulation of centrosome duplication;	.	GO:0046872|metal ion binding;	K16729	CHORDC1, CHP1; cysteine and histidine-rich domain-containing protein 1
ENSDARG00000078770	4	4.107885453	2.358872375	1.799417413	2.746180853	2.176516898	4.033157069	0.955307935	1.997454441	3.172826487	1.089991885	1.766824163	1.538524973	0.468862627	0.935571247	0.729671827	GNPAT	protein_coding	chr20:47020670-47042854:+	gi|528512346|ref|XP_002665823.3|	3372	0	PREDICTED: dihydroxyacetone phosphate acyltransferase isoform X1 [Danio rerio]	gi|597797917|ref|XM_007260450.1|	382	0	PREDICTED: Astyanax mexicanus dihydroxyacetone phosphate acyltransferase-like (LOC103043282), mRNA	A4IF87	442	6.00E-145	Dihydroxyacetone phosphate acyltransferase	PA3673	153	2.00E-37	COG2937	pfam01553	Acyltransferase	Acyltransferase. This family contains acyltransferases involved in phospholipid biosynthesis and other proteins of unknown function. This family also includes tafazzin, the Barth syndrome gene.	GO:0008611|ether lipid biosynthetic process;GO:0006650|glycerophospholipid metabolic process;	GO:0005778|peroxisomal membrane;	GO:0016287|glycerone-phosphate O-acyltransferase activity;	K00649	GNPAT; glyceronephosphate O-acyltransferase [EC:2.3.1.42]
ENSDARG00000003977	4	1.58692853	1.16641597	1.505535179	0.400222792	0.31490811	0.373202631	1.434013672	0.706761191	1.254469835	1.039200412	1.229997205	1.299083252	1.720424804	1.590261649	1.682084889	zgc:153896	protein_coding	chr20:25980736-25988141:+	gi|113931646|ref|NP_001038659.2|	2268	0	ectonucleotide pyrophosphatase/phosphodiesterase family member 7-like precursor [Danio rerio]	gi|113931645|ref|NM_001045194.2|	1457	0	Danio rerio zgc:153896 (zgc:153896), mRNA	Q6UWV6	466	1.00E-151	Ectonucleotide pyrophosphatase/phosphodiesterase family member 7	CC1277	174	2.00E-45	COG1524	pfam01663	Phosphodiest	Type I phosphodiesterase / nucleotide pyrophosphatase. This family consists of phosphodiesterases, including human plasma-cell membrane glycoprotein PC-1 / alkaline phosphodiesterase i / nucleotide pyrophosphatase (nppase). These enzymes catalyse the cleavage of phosphodiester and phosphosulfate bonds in NAD, deoxynucleotides and nucleotide sugars. Also in this family is ATX an autotaxin, tumor c…	GO:0006687|glycosphingolipid metabolic process;GO:0008285|negative regulation of cell proliferation;GO:0008156|negative regulation of DNA replication;GO:0006685|sphingomyelin catabolic process;GO:0006684|sphingomyelin metabolic process;	GO:0005794|Golgi apparatus;GO:0016021|integral component of membrane;GO:0016020|membrane;GO:0005902|microvillus;GO:0005886|plasma membrane;	GO:0004767|sphingomyelin phosphodiesterase activity;	K12354	ENPP7; ectonucleotide pyrophosphatase/phosphodiesterase family member 7 [EC:3.1.4.12]
ENSDARG00000060368	3	0.723441334	1.382524243	0.296739442	0.114944532	0.075368366	0.185256823	0.074207331	0.054675496	0.217121175	0.691467095	0.134924501	0.368492329	0.13725232	0.065905529	0.212213186	syn1	protein_coding	chr8:31110316-31139087:+	gi|187607906|ref|NP_001119909.1|	2260	0	synapsin-1 [Danio rerio]	gi|229331964|ref|NM_001126437.2|	4981	0	Danio rerio synapsin I (syn1), mRNA	P17600	585	0	Synapsin-1	.	.	.	.	pfam02750	Synapsin_C	Synapsin, ATP binding domain. Ca dependent ATP binding in this ATP grasp fold. Function unknown.	GO:0007268|synaptic transmission;GO:0007269|neurotransmitter secretion;GO:0046928|regulation of neurotransmitter secretion;GO:2000300|regulation of synaptic vesicle exocytosis;	GO:0030054|cell junction;GO:0005829|cytosol;GO:0030425|dendrite;GO:0005794|Golgi apparatus;GO:0043209|myelin sheath;GO:0014069|postsynaptic density;GO:0048786|presynaptic active zone;GO:0008021|synaptic vesicle;GO:0030672|synaptic vesicle membrane;GO:0000795|synaptonemal complex;GO:0043195|terminal bouton;	GO:0005524|ATP binding;GO:0003824|catalytic activity;GO:0019901|protein kinase binding;GO:0005215|transporter activity;	.	.
ENSDARG00000030598	1	31.22162738	32.22306367	22.43942481	29.62808423	32.44686202	33.5682859	27.94023066	58.91181501	64.49160056	31.83856135	46.90433539	63.30617362	21.94390847	27.41347755	22.17048583	nampta	protein_coding	chr4:3345056-3372125:+	gi|292612345|ref|XP_002661386.1|	2635	0	PREDICTED: nicotinamide phosphoribosyltransferase [Danio rerio]	gi|8100051|dbj|AB027712.1|	1099	0	Cyprinus carpio mRNA for pre-B cell enhancing factor, complete cds	Q52I78	876	0	Nicotinamide phosphoribosyltransferase	RSp0836	417	1.00E-138	COG1488	pfam04095	NAPRTase	Nicotinate phosphoribosyltransferase (NAPRTase) family. Nicotinate phosphoribosyltransferase (EC:2.4.2.11) is the rate limiting enzyme that catalyses the first reaction in the NAD salvage synthesis. This family also includes Pre-B cell enhancing factor that is a cytokine. This family is related to Quinolinate phosphoribosyltransferase pfam01729.	GO:0032922|circadian regulation of gene expression;GO:0009435|NAD biosynthetic process;GO:0051770|positive regulation of nitric-oxide synthase biosynthetic process;GO:0045944|positive regulation of transcription from RNA polymerase II promoter;	GO:0030054|cell junction;GO:0005737|cytoplasm;GO:0070062|extracellular exosome;GO:0005615|extracellular space;GO:0005654|nucleoplasm;	GO:0047280|nicotinamide phosphoribosyltransferase activity;GO:0004514|nicotinate-nucleotide diphosphorylase (carboxylating) activity;	K03462	NAMPT; nicotinamide phosphoribosyltransferase [EC:2.4.2.12]
ENSDARG00000069548	1	30.54252071	63.31936241	39.28817494	27.85986887	23.21666367	25.89843589	57.72198514	21.49811494	35.6001844	30.51162651	20.66664738	11.97222607	27.45806285	16.71988095	14.71490326	zgc:162780	protein_coding	chr9:28882846-28886253:+	gi|113677884|ref|NP_001038249.1|	1455	0	uncharacterized protein LOC555377 [Danio rerio]	gi|126631891|gb|BC134088.1|	1509	0	Danio rerio zgc:162780, mRNA (cDNA clone MGC:162780 IMAGE:7409013), complete cds	Q55EX9	90.5	1.00E-19	Putative methyltransferase DDB_G0268948	.	.	.	.	pfam08241	Methyltransf_11	Methyltransferase domain. Members of this family are SAM dependent methyltransferases.	GO:0032259|methylation;	GO:0005737|cytoplasm;GO:0045335|phagocytic vesicle;	GO:0008757|S-adenosylmethionine-dependent methyltransferase activity;	.	.
ENSDARG00000101861	6	12.47634253	6.049313248	9.481433032	1.832390417	3.932136715	13.00208141	2.814052662	2.555403351	0.393322873	4.19243472	2.328661924	4.310383082	0.940302006	2.979980722	2.822182225	cyp2k19	protein_coding	chr3:12580933-12588861:+	gi|117558424|gb|AAI25904.1|	2348	0	Cyp2k19 protein [Danio rerio]	gi|51859096|gb|BC081666.1|	3331	0	Danio rerio cytochrome P450 monooxygenase, mRNA (cDNA clone IMAGE:7049283), partial cds	Q92090	620	0	Cytochrome P450 2K1	alr1450	107	1.00E-23	COG2124	pfam00067	p450	Cytochrome P450. Cytochrome P450s are haem-thiolate proteins involved in the oxidative degradation of various compounds. They are particularly well known for their role in the degradation of environmental toxins and mutagens. They can be divided into 4 classes, according to the method by which electrons from NAD(P)H are delivered to the catalytic site. Sequence conservation is relatively low with…	GO:0043390|aflatoxin B1 metabolic process;GO:0048252|lauric acid metabolic process;GO:0002933|lipid hydroxylation;	GO:0005789|endoplasmic reticulum membrane;GO:0031090|organelle membrane;	GO:0070330|aromatase activity;GO:0020037|heme binding;GO:0005506|iron ion binding;	.	.
ENSDARG00000101863	4	0.469870767	0.637275067	0.524436657	0.177751852	0.077700472	0.225094394	0.554650455	0.401617065	0.629548609	0.34915739	0.701819899	0.48843579	0.848995724	0.774571049	0.270257215	CR382337.3	protein_coding	chr3:10947570-11044582:-	gi|688541402|ref|XP_009297466.1|	2455	0	PREDICTED: uncharacterized protein LOC100001930 [Danio rerio]	gi|66472331|ref|NM_001020706.1|	501	0	Danio rerio zgc:112965 (zgc:112965), mRNA	Q501W4	60.8	6.00E-09	V-set domain-containing T-cell activation inhibitor 1	.	.	.	.	pfam07679	I-set	Immunoglobulin I-set domain.	.	GO:0016021|integral component of membrane;	.	K06712	BTN; butyrophilin
ENSDARG00000060366	1	39.90955188	36.07072449	26.64884516	32.22416272	16.46463661	28.16704378	26.65691687	21.64270948	48.63064599	32.15012896	25.32236369	20.90802744	13.76672185	15.7549664	15.93498292	slc12a9	protein_coding	chr5:37615771-37648309:-	gi|190570145|ref|NP_001122020.1|	4339	0	solute carrier family 12 member 9 [Danio rerio]	gi|190570144|ref|NM_001128548.1|	2700	0	Danio rerio solute carrier family 12, member 9 (slc12a9), mRNA	A2BFP5	1668	0	Solute carrier family 12 member 9	YBR235w	384	3.00E-111	COG0531	pfam00324	AA_permease	Amino acid permease.	.	GO:0016021|integral component of membrane;GO:0005886|plasma membrane;	GO:0022820|potassium ion symporter activity;GO:0015379|potassium:chloride symporter activity;	K14429	SLC12A9, CCC6; solute carrier family 12 (potassium/chloride transporters), member 9
ENSDARG00000078359	1	6.335756102	10.10130879	8.234946542	12.74775563	16.501531	13.5913654	8.12366403	9.418304805	7.209287906	9.496158449	8.491077892	13.4748447	14.42273706	9.167096979	11.13344175	endouc	protein_coding	chr18:15490813-15498934:-	gi|113678865|ref|NP_001038439.1|	1597	0	poly(U)-specific endoribonuclease-C precursor [Danio rerio]	gi|113678864|ref|NM_001044974.1|	1547	0	Danio rerio si:dkey-103i16.2 (si:dkey-103i16.2), mRNA	Q1LUM3	619	0	Poly(U)-specific endoribonuclease-C	.	.	.	.	pfam09412	XendoU	Endoribonuclease XendoU. This is a family of endoribonucleases involved in RNA biosynthesis which has been named XendoU in Xenopus laevis. XendoU is a U-specific metal dependent enzyme that produces products with a 2'-3' cyclic phosphate termini.	.	GO:0005576|extracellular region;	GO:0004521|endoribonuclease activity;GO:0046872|metal ion binding;GO:0003723|RNA binding;	.	.
ENSDARG00000040982	2	2.31547713	0.17728229	1.319106793	0.085161195	0.418797222	0	0	0	0	1.976016984	0.081788845	0	0.249599783	0.175783368	0.332950273	fgf14	protein_coding	chr9:32027298-32104677:-	gi|59933268|ref|NP_001012382.1|	1282	3.00E-177	fibroblast growth factor 14 [Danio rerio]	gi|190338146|gb|BC162852.1|	747	0	Danio rerio fibroblast growth factor 14, mRNA (cDNA clone MGC:194258 IMAGE:9037183), complete cds	Q92915	423	3.00E-149	Fibroblast growth factor 14	.	.	.	.	pfam00167	FGF	Fibroblast growth factor. Fibroblast growth factors are a family of proteins involved in growth and differentiation in a wide range of contexts. They are found in a wide range of organisms, from nematodes to humans. Most share an internal core region of high similarity, conserved residues in which are involved in binding with their receptors. On binding, they cause dimerization of their tyrosine …	GO:0007267|cell-cell signaling;GO:0007254|JNK cascade;GO:0007399|nervous system development;GO:1901843|positive regulation of high voltage-gated calcium channel activity;GO:0060078|regulation of postsynaptic membrane potential;GO:0048167|regulation of synaptic plasticity;GO:1903421|regulation of synaptic vesicle recycling;GO:0007165|signal transduction;	GO:0005576|extracellular region;GO:0005622|intracellular;GO:0005634|nucleus;	GO:0008083|growth factor activity;GO:0008201|heparin binding;	K04358	FGF; fibroblast growth factor
ENSDARG00000029848	4	2.339419891	3.778758078	3.537613551	2.497987412	1.637913744	1.207806594	1.386906516	0.748574811	1.698660583	4.2689061	2.846894137	1.098255972	0.846025653	0.756236617	1.432383453	FBXO15	protein_coding	chr2:23004136-23021368:+	gi|115313519|gb|AAI24187.1|	2649	0	Zgc:161973 protein [Danio rerio]	gi|130501886|ref|NM_001082806.1|	1774	0	Danio rerio zgc:161973 (zgc:161973), mRNA	Q3SYW0	92	7.00E-20	F-box only protein 15	.	.	.	.	pfam12937	F-box-like	F-box-like. This is an F-box-like family.	GO:0043161|proteasome-mediated ubiquitin-dependent protein catabolic process;	GO:0000151|ubiquitin ligase complex;	.	K10298	FBXO15; F-box protein 15
ENSDARG00000103642	3	0	0.04110176	0	6.515545069	8.971619158	3.477651867	0.076479767	0.380361237	0.083913763	0	0.037924437	0.04069035	0.038578737	0.122262734	0.077192382	pglyrp6	protein_coding	chr3:13474969-13483485:+	gi|213626179|gb|AAI71349.1|	2542	0	Pglyrp6 protein [Danio rerio]	gi|213626178|gb|BC171349.1|	1579	0	Danio rerio peptidoglycan recognition protein 6, mRNA (cDNA clone MGC:198076 IMAGE:9039065), complete cds	Q8VCS0	266	5.00E-80	N-acetylmuramoyl-L-alanine amidase	.	.	.	.	pfam01510	Amidase_2	N-acetylmuramoyl-L-alanine amidase. This family includes zinc amidases that have N-acetylmuramoyl-L-alanine amidase activity EC:3.5.1.28. This enzyme domain cleaves the amide bond between N-acetylmuramoyl and L-amino acids in bacterial cell walls (preferentially: D-lactyl-L-Ala). The structure is known for the bacteriophage T7 structure and shows that two of the conserved histidines are zinc bind…	GO:0050830|defense response to Gram-positive bacterium;GO:0016045|detection of bacterium;GO:0044117|growth of symbiont in host;GO:0032689|negative regulation of interferon-gamma production;GO:0032827|negative regulation of natural killer cell differentiation involved in immune response;GO:0009253|peptidoglycan catabolic process;GO:0050727|regulation of inflammatory response;	GO:0070062|extracellular exosome;GO:0016020|membrane;	GO:0008745|N-acetylmuramoyl-L-alanine amidase activity;GO:0042834|peptidoglycan binding;GO:0016019|peptidoglycan receptor activity;GO:0008270|zinc ion binding;	K01446	E3.5.1.28; N-acetylmuramoyl-L-alanine amidase [EC:3.5.1.28]
ENSDARG00000018459	4	4.567177673	0.769941106	3.887475647	1.405456794	2.400876821	2.337567214	0.465615046	1.068770847	0.510873816	1.021653299	0.710421714	2.553485042	2.56550847	2.55749471	1.265259432	msrb2	protein_coding	chr24:16897404-16903499:-	gi|47086197|ref|NP_998086.1|	959	3.00E-124	methionine-R-sulfoxide reductase B2, mitochondrial precursor [Danio rerio]	gi|47086196|ref|NM_212921.1|	1134	0	Danio rerio methionine sulfoxide reductase B2 (msrb2), mRNA	Q6NW52	374	1.00E-125	Methionine-R-sulfoxide reductase B2, mitochondrial	MTH711	142	9.00E-39	COG0229	pfam01641	SelR	SelR domain. Methionine sulfoxide reduction is an important process, by which cells regulate biological processes and cope with oxidative stress. MsrA, a protein involved in the reduction of methionine sulfoxides in proteins, has been known for four decades and has been extensively characterized with respect to structure and function. However, recent studies revealed that MsrA is only specific fo…	GO:0030041|actin filament polymerization;GO:0030091|protein repair;GO:0006979|response to oxidative stress;	GO:0005739|mitochondrion;	GO:0003779|actin binding;GO:0046872|metal ion binding;GO:0033743|peptide-methionine (R)-S-oxide reductase activity;	K07305	msrB; peptide-methionine (R)-S-oxide reductase [EC:1.8.4.12]
ENSDARG00000030621	4	5.932228779	0.765750951	1.388523346	0.389482119	0.425634728	0.896758249	0.125723372	0.555793154	1.287476871	0.525977699	1.371548861	3.701244031	3.044098581	0.580623228	3.299265411	th	protein_coding	chr25:23957793-23976952:-	gi|169234748|ref|NP_571224.1|	2428	0	tyrosine 3-monooxygenase [Danio rerio]	gi|169234747|ref|NM_131149.1|	1470	0	Danio rerio tyrosine hydroxylase (th), mRNA	O42091	808	0	Tyrosine 3-monooxygenase	VCA0828	131	1.00E-33	COG3186	pfam00351	Biopterin_H	Biopterin-dependent aromatic amino acid hydroxylase. This family includes phenylalanine-4-hydroxylase, the phenylketonuria disease protein.	GO:0009072|aromatic amino acid family metabolic process;GO:0042416|dopamine biosynthetic process;GO:0042136|neurotransmitter biosynthetic process;	.	GO:0005506|iron ion binding;GO:0004511|tyrosine 3-monooxygenase activity;	.	.
ENSDARG00000060148	4	2.992855894	2.557452119	1.839564183	0.905228757	0.672289033	1.129313822	1.153909443	1.354377611	2.14937786	2.327001933	2.45733499	2.72221807	1.416814916	1.496711025	1.643165436	sh3pxd2aa	protein_coding	chr1:46894468-46995656:+	gi|688533915|ref|XP_009292189.1|	5252	0	PREDICTED: SH3 and PX domain-containing protein 2A isoform X4 [Danio rerio]	gi|77681159|emb|CR388131.10|	5572	0	Zebrafish DNA sequence from clone DKEY-114G9 in linkage group 1, complete sequence	Q1LYG0	1993	0	SH3 and PX domain-containing protein 2A	.	.	.	.	pfam07653	SH3_2	Variant SH3 domain. SH3 (Src homology 3) domains are often indicative of a protein involved in signal transduction related to cytoskeletal organisation. First described in the Src cytoplasmic tyrosine kinase. The structure is a partly opened beta barrel.	GO:0001755|neural crest cell migration;GO:0055114|oxidation-reduction process;GO:0071800|podosome assembly;GO:0048920|posterior lateral line neuromast primordium migration;GO:0072593|reactive oxygen species metabolic process;GO:0006801|superoxide metabolic process;	GO:0030054|cell junction;GO:0042995|cell projection;GO:0005737|cytoplasm;GO:0002102|podosome;	GO:0035091|phosphatidylinositol binding;GO:0016176|superoxide-generating NADPH oxidase activator activity;	.	.
ENSDARG00000041858	1	17.67421864	11.80635601	12.22476322	28.15523462	30.29129136	35.52311426	12.0151788	17.40421523	17.70745021	9.69373891	7.826527046	12.78512858	12.01405997	5.569127495	5.058951734	ren	protein_coding	chr8:37079209-37100488:+	gi|37787745|gb|AAO41706.1|	1953	0	renin precursor [Danio rerio]	gi|47086316|ref|NM_212860.1|	1376	0	Danio rerio renin (ren), mRNA	Q6DYE7	446	2.00E-152	Renin	.	.	.	.	pfam00026	Asp	Eukaryotic aspartyl protease. Aspartyl (acid) proteases include pepsins, cathepsins, and renins. Two-domain structure, probably arising from ancestral duplication. This family does not include the retroviral nor retrotransposon proteases (pfam00077), which are much smaller and appear to be homologous to a single domain of the eukaryotic asp proteases.	GO:0002003|angiotensin maturation;GO:0048469|cell maturation;GO:0042756|drinking behavior;GO:0009755|hormone-mediated signaling pathway;GO:0008584|male gonad development;GO:0001823|mesonephros development;GO:0043408|regulation of MAPK cascade;GO:0002018|renin-angiotensin regulation of aldosterone production;	GO:0005615|extracellular space;GO:0005764|lysosome;GO:0016020|membrane;	GO:0004190|aspartic-type endopeptidase activity;	K01380	REN; renin [EC:3.4.23.15]
ENSDARG00000045808	3	0.094393223	0.173451042	0.23046421	0.124981165	0.122923978	0.172656794	0.927899411	2.140185819	0.70823875	0.138093805	0.12003196	0.171714874	0.081401894	0.085992257	0.122158082	rlbp1b	protein_coding	chr25:19007853-19020176:+	gi|45387797|ref|NP_991253.1|	1637	0	retinaldehyde binding protein 1b [Danio rerio]	gi|41389012|gb|BC065863.1|	1360	0	Danio rerio retinaldehyde binding protein 1b, mRNA (cDNA clone MGC:77766 IMAGE:7001057), complete cds	P10123	463	1.00E-159	Retinaldehyde-binding protein 1	.	.	.	.	pfam00650	CRAL_TRIO	CRAL/TRIO domain.	GO:0050896|response to stimulus;GO:0007601|visual perception;	GO:0005737|cytoplasm;	GO:0005502|11-cis retinal binding;GO:0019841|retinol binding;GO:0005215|transporter activity;	.	.
ENSDARG00000061099	3	0.44021342	0.083458809	0.64828952	0.074014442	0.060663472	0.063905111	0.023891585	0.125422587	0.104855592	0.040889905	0.053312624	0.317782399	0.090387356	0.197334471	0.084399698	nfasca	protein_coding	chr11:23466553-23646948:+	gi|224809606|ref|NP_001139239.1|	6562	0	neurofascin precursor [Danio rerio]	gi|110735645|emb|CR354444.17|	5387	0	Zebrafish DNA sequence from clone DKEY-158N23 in linkage group 11, complete sequence	O94856	1255	0	Neurofascin	.	.	.	.	pfam13882	Bravo_FIGEY	Bravo-like intracellular region. This is the very C-terminal intracellular region of neural adhesion molecule L1 proteins that are also known as Bravo or NrCAM. It lies upstream of the IG and Fn3 domains and has the highly conserved motif FIGEY. The function is not known.	GO:0007411|axon guidance;GO:0045162|clustering of voltage-gated sodium channels;GO:0034113|heterotypic cell-cell adhesion;GO:0042552|myelination;GO:0030913|paranodal junction assembly;GO:0007422|peripheral nervous system development;GO:0071205|protein localization to juxtaparanode region of axon;GO:0002175|protein localization to paranode region of axon;GO:0072661|protein targeting to plasma memb…	GO:0043194|axon initial segment;GO:0070062|extracellular exosome;GO:0005925|focal adhesion;GO:0016021|integral component of membrane;GO:0005622|intracellular;GO:0043209|myelin sheath;GO:0033268|node of Ranvier;GO:0033010|paranodal junction;GO:0033270|paranode region of axon;GO:0005886|plasma membrane;GO:0097454|Schwann cell microvillus;	.	K06757	NFASC; neurofascin
ENSDARG00000061093	6	3.505513122	2.950103384	3.423530997	5.746579285	7.058594805	11.86761399	2.228487236	4.13266798	5.152670308	3.433323019	3.446264012	3.65741628	1.841773999	1.247889473	1.99509887	phldb1a	protein_coding	chr5:29826846-29891289:-	gi|528479565|ref|XP_694648.5|	6679	0	PREDICTED: pleckstrin homology-like domain family B member 1 isoform X1 [Danio rerio]	gi|41322841|emb|BX294389.5|	1186	0	Zebrafish DNA sequence from clone DKEY-180I4 in linkage group 5, complete sequence	Q63312	260	8.00E-71	Pleckstrin homology-like domain family B member 1 (Fragment)	.	.	.	.	pfam13868	Trichoplein	tumor suppressor, Mitostatin. Trichoplein or mitostatin, was first defined as a meiosis-specific nuclear structural protein. It has since been linked with mitochondrial movement. It is associated with the mitochondrial outer membrane, and over-expression leads to reduction in mitochondrial motility whereas lack of it enhances mitochondrial movement. The activity appears to be mediated through bin…	.	.	GO:0005525|GTP binding;GO:0046872|metal ion binding;	.	.
ENSDARG00000041119	3	0.266008215	0.174571408	0.185562272	0.301892283	0.593846291	0.590824905	0.211141017	0.107700493	0.071281345	0.908040496	0.434906201	0.103694416	0.540722758	0.190404948	0.29507312	ceacam1	protein_coding	chr16:11833328-11869694:+	gi|169154038|emb|CAQ13811.1|	4522	0	novel protein similar to vertebrate titin (TTN) [Danio rerio]	gi|166157556|ref|NM_001113794.1|	2995	0	Danio rerio carcinoembryonic antigen-related cell adhesion molecule 1 (ceacam1), mRNA	P06731	155	1.00E-37	Carcinoembryonic antigen-related cell adhesion molecule 5	.	.	.	.	pfam13895	Ig_2	Immunoglobulin domain. This domain contains immunoglobulin-like domains.	GO:0034109|homotypic cell-cell adhesion;GO:2000811|negative regulation of anoikis;GO:0043066|negative regulation of apoptotic process;GO:0010832|negative regulation of myotube differentiation;	GO:0031225|anchored component of membrane;GO:0016323|basolateral plasma membrane;GO:0070062|extracellular exosome;GO:0071575|integral component of external side of plasma membrane;GO:0005887|integral component of plasma membrane;	GO:0034235|GPI anchor binding;GO:0042802|identical protein binding;GO:0042803|protein homodimerization activity;	K06499	CEACAM; carcinoembryonic antigen-related cell adhesion molecule
ENSDARG00000061096	6	1.60984958	1.41931833	1.302226784	2.956853572	2.117609602	5.056405377	1.709690348	1.213602944	3.126459797	2.569255192	3.460099983	1.996737522	1.135870494	0.874018546	1.851885646	dapk2a	protein_coding	chr7:29007430-29021056:-	gi|239835757|ref|NP_001116536.2|	2583	0	death-associated protein kinase 3-like [Danio rerio]	gi|83308945|emb|CR352249.24|	3543	0	Zebrafish DNA sequence from clone DKEY-97O18 in linkage group 7, complete sequence	O43293	400	1.00E-133	Death-associated protein kinase 3	.	.	.	.	pfam00069	Pkinase	Protein kinase domain.	GO:0006915|apoptotic process;GO:0097190|apoptotic signaling pathway;GO:0071346|cellular response to interferon-gamma;GO:0016569|covalent chromatin modification;GO:0000910|cytokinesis;GO:0035556|intracellular signal transduction;GO:0017148|negative regulation of translation;GO:0030182|neuron differentiation;GO:0043065|positive regulation of apoptotic process;GO:0090263|positive regulation of canon…	GO:0005884|actin filament;GO:0005737|cytoplasm;GO:0045121|membrane raft;GO:0005634|nucleus;GO:0016605|PML body;	GO:0005524|ATP binding;GO:0008140|cAMP response element binding protein binding;GO:0043522|leucine zipper domain binding;GO:0042803|protein homodimerization activity;GO:0004674|protein serine/threonine kinase activity;GO:0017048|Rho GTPase binding;	K08803	DAPK; death-associated protein kinase [EC:2.7.11.1]
ENSDARG00000014717	1	21.13785665	17.81485582	18.60325564	9.512195369	10.94603559	16.5715438	9.494174866	15.43186207	19.51962156	16.99650109	22.33818372	26.52164688	9.424400615	8.483039058	9.668683145	DYNC1H1	protein_coding	chr17:1527965-1599371:-	gi|112363126|ref|NP_001036210.1|	21897	0	cytoplasmic dynein 1 heavy chain 1 [Danio rerio]	gi|112363125|ref|NM_001042745.1|	5311	0	Danio rerio dynein, cytoplasmic 1, heavy chain 1 (dync1h1), mRNA	Q9JHU4	7793	0	Cytoplasmic dynein 1 heavy chain 1	YKR054c	913	0	COG5245	pfam03028	Dynein_heavy	Dynein heavy chain and region D6 of dynein motor. This family represents the C-terminal region of dynein heavy chain. The chain also contains ATPase activity and microtubule binding ability and acts as a motor for the movement of organelles and vesicles along microtubules. Dynein is also involved in cilia and flagella movement. The dynein subunit consists of at least two heavy chains and a number…	GO:0003341|cilium movement;GO:0033962|cytoplasmic mRNA processing body assembly;GO:0051293|establishment of spindle localization;GO:0034063|stress granule assembly;GO:0006810|transport;	GO:0005813|centrosome;GO:0005737|cytoplasm;GO:0005868|cytoplasmic dynein complex;GO:0070062|extracellular exosome;GO:0031012|extracellular matrix;GO:0030175|filopodium;GO:0016020|membrane;GO:0005874|microtubule;	GO:0005524|ATP binding;GO:0016887|ATPase activity;GO:0051959|dynein light intermediate chain binding;GO:0003777|microtubule motor activity;GO:0044822|poly(A) RNA binding;	K10413	DYNC1H; dynein heavy chain 1, cytosolic
ENSDARG00000068148	1	15.67185824	10.28486419	12.9453383	13.425738	11.60043525	14.36537733	11.08758632	13.76465047	15.79825539	10.91778614	8.796898467	8.63038705	6.466332847	7.34896696	8.830077658	arrdc1a	protein_coding	chr5:28916691-28931795:-	gi|52218968|ref|NP_001004561.1|	2001	0	arrestin domain containing 1a [Danio rerio]	gi|52218967|ref|NM_001004561.1|	2028	0	Danio rerio arrestin domain containing 1a (arrdc1a), mRNA	Q8N5I2	337	1.00E-106	Arrestin domain-containing protein 1	.	.	.	.	pfam02752	Arrestin_C	Arrestin (or S-antigen), C-terminal domain. Ig-like beta-sandwich fold. Scop reports duplication with N-terminal domain.	.	GO:0031410|cytoplasmic vesicle;GO:0070062|extracellular exosome;GO:0005886|plasma membrane;	.	.	.
ENSDARG00000059890	3	0	0.06919011	0.220638776	0.132947571	0.130759258	0.206619847	0	0.284575387	0.070629609	0.661032103	1.915243493	0.753473027	0.324714452	0.137210215	0.194916814	CU855821.1	protein_coding	chr16:50999324-51000280:-	gi|292622768|ref|XP_001343441.3|	1426	0	PREDICTED: free fatty acid receptor 3-like [Danio rerio]	gi|218044525|emb|CU855821.11|	957	0	Zebrafish DNA sequence from clone CH73-90P23 in linkage group 16, complete sequence	O14843	224	2.00E-68	Free fatty acid receptor 3	.	.	.	.	pfam00001	7tm_1	7 transmembrane receptor (rhodopsin family). This family contains, amongst other G-protein-coupled receptors (GCPRs), members of the opsin family, which have been considered to be typical members of the rhodopsin superfamily. They share several motifs, mainly the seven transmembrane helices, GCPRs of the rhodopsin superfamily. All opsins bind a chromophore, such as 11-cis-retinal. The function of…	GO:0007193|adenylate cyclase-inhibiting G-protein coupled receptor signaling pathway;GO:0071398|cellular response to fatty acid;GO:0007186|G-protein coupled receptor signaling pathway;GO:0006954|inflammatory response;GO:0002385|mucosal immune response;GO:0045776|negative regulation of blood pressure;GO:0002879|positive regulation of acute inflammatory response to non-antigenic stimulus;GO:0032722…	GO:0005887|integral component of plasma membrane;GO:0005886|plasma membrane;	GO:0004930|G-protein coupled receptor activity;GO:0008289|lipid binding;	K04326	FFAR3, GPR41; free fatty acid receptor 3
ENSDARG00000031246	1	13.08002663	8.696887003	8.782213642	14.6980088	12.77514049	31.16542756	7.539649377	7.601093538	5.568817867	8.938337975	8.899993584	6.535647526	10.01826473	8.270581245	8.240966507	hbegfb	protein_coding	chr21:30124600-30132252:-	gi|44890390|gb|AAH66705.1|	1055	3.00E-138	Hbegf protein [Danio rerio]	gi|152012508|gb|BC150223.1|	1617	0	Danio rerio heparin-binding EGF-like growth factor, mRNA (cDNA clone MGC:165443 IMAGE:5612791), complete cds	Q9W7C5	123	7.00E-31	Proheparin-binding EGF-like growth factor	.	.	.	.	pfam05966	Chordopox_A33R	Chordopoxvirus A33R protein. This family consists of several Chordopoxvirus A33R proteins. A33R plays a role in promoting Ab-resistant cell-to-cell spread of virus and interacts with A36R to incorporate the protein into the outer membrane of intracellular enveloped virions (IEV).	GO:0060326|cell chemotaxis;GO:0021545|cranial nerve development;GO:0007173|epidermal growth factor receptor signaling pathway;GO:0008284|positive regulation of cell proliferation;GO:0051549|positive regulation of keratinocyte migration;GO:0051897|positive regulation of protein kinase B signaling;GO:0048661|positive regulation of smooth muscle cell proliferation;GO:0090303|positive regulation of w…	GO:0009986|cell surface;GO:0005615|extracellular space;GO:0005887|integral component of plasma membrane;	GO:0005154|epidermal growth factor receptor binding;GO:0008083|growth factor activity;GO:0008201|heparin binding;	K08523	HBEGF; heparin-binding EGF-like growth factor
ENSDARG00000104199	2	5.143151606	0.059814756	7.375354359	0.114932995	3.108633042	0.059540859	0	0.123007518	0	6.413066347	0.055190847	0.059216037	0.729859529	0.533781204	1.572716331	si:dkey-43p13.5	protein_coding	chr3:42380533-42386247:+	gi|528474899|ref|XP_002661267.2|	1319	9.00E-180	PREDICTED: retinal homeobox protein Rx1 [Danio rerio]	gi|528474898|ref|XM_002661221.3|	1102	0	PREDICTED: Danio rerio si:dkey-43p13.5 (si:dkey-43p13.5), mRNA	P29506	105	1.00E-24	Homeobox protein unc-4	ECU03g1170	52	7.00E-07	COG5576	pfam00046	Homeobox	Homeobox domain.	GO:0040011|locomotion;GO:0007400|neuroblast fate determination;GO:0050770|regulation of axonogenesis;GO:0050803|regulation of synapse structure or activity;GO:0006355|regulation of transcription, DNA-templated;GO:0007416|synapse assembly;GO:0008039|synaptic target recognition;GO:0048489|synaptic vesicle transport;GO:0006351|transcription, DNA-templated;	GO:0030424|axon;GO:0005634|nucleus;	GO:0043565|sequence-specific DNA binding;GO:0003700|transcription factor activity, sequence-specific DNA binding;	K09328	UNC4; homeobox protein Unc-4
ENSDARG00000042751	5	39.37884653	42.94334893	44.95130371	156.9948737	194.0270283	224.8093152	122.0925141	137.9265875	124.3465099	47.4388243	54.95644484	36.21387493	47.26975797	50.6203974	50.39835922	riok3	protein_coding	chr24:36351545-36365145:+	gi|57525667|ref|NP_001003614.1|	2653	0	serine/threonine-protein kinase RIO3 [Danio rerio]	gi|402745376|ref|NM_001003614.2|	1762	0	Danio rerio RIO kinase 3 (yeast) (riok3), mRNA	O14730	738	0	Serine/threonine-protein kinase RIO3	SPAC10F6.10	231	6.00E-67	COG1718	pfam01163	RIO1	RIO1 family. This is a family of atypical serine kinases which are found in archaea, bacteria and eukaryotes. Activity of Rio1 is vital in Saccharomyces cerevisiae for the processing of ribosomal RNA, as well as for proper cell cycle progression and chromosome maintenance. The structure of RIO1 has been determined.	GO:0007059|chromosome segregation;GO:0006364|rRNA processing;	GO:0005829|cytosol;	GO:0005524|ATP binding;GO:0046872|metal ion binding;GO:0004674|protein serine/threonine kinase activity;	K08872	RIOK3, SUDD; RIO kinase 3 [EC:2.7.11.1]
ENSDARG00000017388	1	32.92585028	26.57538657	24.65807983	13.31485384	11.64061489	8.653077999	20.28833798	15.98687097	18.81232614	22.83230341	21.81682168	14.50704068	29.46663068	19.99697357	21.03712456	gstt1b	protein_coding	chr21:15617120-15624557:+	gi|41053646|ref|NP_956878.1|	1269	5.00E-172	glutathione S-transferase theta 1b [Danio rerio]	gi|41053645|ref|NM_200584.1|	1207	0	Danio rerio glutathione S-transferase theta 1b (gstt1b), mRNA	P20135	261	2.00E-82	Glutathione S-transferase theta-1	SMb20420	73.6	4.00E-14	COG0625	pfam00043	GST_C	Glutathione S-transferase, C-terminal domain. GST conjugates reduced glutathione to a variety of targets including S-crystallin from squid, the eukaryotic elongation factor 1-gamma, the HSP26 family of stress-related proteins and auxin-regulated proteins in plants. Stringent starvation proteins in Escherichia coli are also included in the alignment but are not known to have GST activity. The glut…	GO:0006749|glutathione metabolic process;	GO:0005737|cytoplasm;	GO:0004364|glutathione transferase activity;	K00799	GST, gst; glutathione S-transferase [EC:2.5.1.18]
ENSDARG00000017437	3	0.238822313	0.455723489	0.287061003	0.162160114	0.095694578	0.050404077	0.157034036	0.242973556	0.017229808	0.161256111	0.482789776	0.1336776	0.174268113	0.569021921	0.380393353	adcy3b	protein_coding	chr20:46748196-46790222:+	gi|554806853|ref|XP_005914352.1|	3796	0	PREDICTED: adenylate cyclase type 3-like [Haplochromis burtoni]	gi|40975061|emb|AL929435.16|	820	0	Zebrafish DNA sequence from clone CH211-153J24 in linkage group 20, complete sequence	O60266	1361	0	Adenylate cyclase type 3	all0661	148	1.00E-36	COG2114	pfam00211	Guanylate_cyc	Adenylate and Guanylate cyclase catalytic domain.	GO:0007340|acrosome reaction;GO:0007190|activation of adenylate cyclase activity;GO:0034199|activation of protein kinase A activity;GO:0007189|adenylate cyclase-activating G-protein coupled receptor signaling pathway;GO:0007193|adenylate cyclase-inhibiting G-protein coupled receptor signaling pathway;GO:0006171|cAMP biosynthetic process;GO:0019933|cAMP-mediated signaling;GO:1904322|cellular respo…	GO:0005929|cilium;GO:0005737|cytoplasm;GO:0005794|Golgi apparatus;GO:0016021|integral component of membrane;GO:0005887|integral component of plasma membrane;GO:0016020|membrane;GO:0005886|plasma membrane;	GO:0004016|adenylate cyclase activity;GO:0005524|ATP binding;GO:0046872|metal ion binding;	K08043	ADCY3; adenylate cyclase 3 [EC:4.6.1.1]
ENSDARG00000067796	1	8.464404197	8.8678219	8.861158997	13.1692236	15.27861441	19.07458214	7.339440443	9.204516958	10.25167736	7.720884756	11.5378249	12.15775045	7.351963198	7.045370669	7.696784879	clpxb	protein_coding	chr25:35070292-35094948:-	gi|326680427|ref|XP_002667004.2|	2893	0	PREDICTED: ATP-dependent Clp protease ATP-binding subunit clpX-like, mitochondrial [Danio rerio]	gi|597731850|ref|XM_007228220.1|	627	0	PREDICTED: Astyanax mexicanus ATP-dependent Clp protease ATP-binding subunit clpX-like, mitochondrial-like (LOC103041261), transcript variant X2, mRNA	Q9JHS4	868	0	ATP-dependent Clp protease ATP-binding subunit clpX-like, mitochondrial	Cgl2336	320	1.00E-99	COG1219	pfam07724	AAA_2	AAA domain (Cdc48 subfamily). This Pfam entry includes some of the AAA proteins not detected by the pfam00004 model.	GO:0030163|protein catabolic process;GO:0006457|protein folding;GO:0006508|proteolysis;GO:0051603|proteolysis involved in cellular protein catabolic process;	GO:0005737|cytoplasm;GO:0009368|endopeptidase Clp complex;GO:0009841|mitochondrial endopeptidase Clp complex;GO:0005743|mitochondrial inner membrane;GO:0005759|mitochondrial matrix;GO:0042645|mitochondrial nucleoid;GO:0005739|mitochondrion;GO:0005654|nucleoplasm;	GO:0005524|ATP binding;GO:0004176|ATP-dependent peptidase activity;GO:0016887|ATPase activity;GO:0046872|metal ion binding;GO:0016504|peptidase activator activity;	K03544	clpX, CLPX; ATP-dependent Clp protease ATP-binding subunit ClpX
ENSDARG00000006526	1	10.31471123	5.580560035	7.507089838	14.18845942	10.63524574	10.97329587	5.824176379	8.19097127	7.866118238	18.36281272	17.58185163	21.86980137	15.34760729	12.09171764	18.88433248	fn1b	protein_coding	chr1:4806323-4845260:-	gi|688531199|ref|XP_009303829.1|	13227	0	PREDICTED: fibronectin isoform X2 [Danio rerio]	gi|51949770|gb|AY725818.1|	8399	0	Danio rerio fibronectin 1b (fn1b) mRNA, complete cds	P02751	81.6	1.00E-15	Fibronectin	.	.	.	.	pfam00040	fn2	Fibronectin type II domain.	GO:0006953|acute-phase response;GO:0001525|angiogenesis;GO:0007155|cell adhesion;GO:0008360|regulation of cell shape;	GO:0005576|extracellular region;GO:0005578|proteinaceous extracellular matrix;	GO:0008201|heparin binding;	K05717	FN1; fibronectin 1
ENSDARG00000055740	3	0	0	0	0.741870703	0.729659534	0.528446825	0.134703613	0.148873166	0.197062786	0	0	0.047778537	0.045299086	0	0	9-Mar	protein_coding	chr23:36649132-36676159:+	gi|125852404|ref|XP_001339845.1|	1746	0	PREDICTED: E3 ubiquitin-protein ligase MARCH9 [Danio rerio]	gi|617507441|ref|XM_007541858.1|	548	0	PREDICTED: Poecilia formosa E3 ubiquitin-protein ligase MARCH9-like (LOC103130462), mRNA	Q3TZ87	433	3.00E-148	E3 ubiquitin-protein ligase MARCH9	ECU06g0830	56.2	1.00E-07	COG5183	pfam12906	RINGv	RING-variant domain.	GO:0016567|protein ubiquitination;	GO:0000139|Golgi membrane;GO:0005795|Golgi stack;GO:0016021|integral component of membrane;GO:0005765|lysosomal membrane;GO:0005802|trans-Golgi network;	GO:0016874|ligase activity;GO:0008270|zinc ion binding;	K10659	MARCH4_9_11; E3 ubiquitin-protein ligase MARCH4/9/11 [EC:2.3.2.27]
ENSDARG00000103501	3	0.537830042	0.219618359	0.408529343	0.052749098	0.1037617	0.054653177	0.204326541	0.338729659	0.280234393	0.641117095	0.455942294	0.81532529	0.463808553	0.544403715	0.618691179	CR391997.3	protein_coding	chr4:70355174-70365348:+	gi|156229961|gb|AAI52115.1|	813	4.00E-104	Zgc:173620 protein [Danio rerio]	gi|72534317|emb|CR391997.9|	983	0	Zebrafish DNA sequence from clone CH211-236G14, complete sequence	P18735	139	2.00E-37	Gastrula zinc finger protein XlCGF7.1 (Fragment)	.	.	.	.	pfam13465	zf-H2C2_2	Zinc-finger double domain.	GO:0006355|regulation of transcription, DNA-templated;GO:0006351|transcription, DNA-templated;	GO:0005634|nucleus;	GO:0003677|DNA binding;GO:0046872|metal ion binding;	.	.
ENSDARG00000104225	1	12.51897333	5.999463272	11.77627274	24.54090965	28.01488033	36.52806897	5.615970075	7.304246606	7.157519762	13.12804613	6.079061629	6.13982092	6.563960949	2.664158661	5.443639801	ndel1b	protein_coding	chr3:44439270-44466666:-	gi|41152014|ref|NP_958464.1|	1669	0	nuclear distribution protein nudE-like 1-B [Danio rerio]	gi|49532643|emb|BX682555.6|	2571	0	Zebrafish DNA sequence from clone DKEY-217L10 in linkage group 3, complete sequence	Q803Q2	647	0	Nuclear distribution protein nudE-like 1-B	.	.	.	.	pfam04880	NUDE_C	NUDE protein, C-terminal conserved region. This family represents the C-terminal conserved region of the NUDE proteins. NUDE proteins are involved in nuclear migration.	GO:0016477|cell migration;GO:0051642|centrosome localization;GO:0007059|chromosome segregation;GO:0051303|establishment of chromosome localization;GO:0000132|establishment of mitotic spindle orientation;GO:0007020|microtubule nucleation;GO:0007100|mitotic centrosome separation;GO:0060052|neurofilament cytoskeleton organization;GO:2000574|regulation of microtubule motor activity;GO:0010975|regulat…	GO:0005813|centrosome;GO:0005737|cytoplasm;GO:0005871|kinesin complex;GO:0000776|kinetochore;GO:0005874|microtubule;GO:0005819|spindle;	GO:0008017|microtubule binding;	K16739	NDEL1; nuclear distribution protein NudE-like 1
ENSDARG00000103509	1	23.55725382	11.555515	15.20757349	30.66227651	42.1166153	24.10068844	29.86365413	29.23302635	27.71106727	20.83380312	27.24791982	55.92815298	36.8425874	34.55530952	29.4529564	si:ch73-106n3.2	protein_coding	chr3:13419960-13426206:+	gi|688541637|ref|XP_009297506.1|	400	6.00E-46	PREDICTED: uncharacterized protein LOC101885078 isoform X2 [Danio rerio]	gi|262113862|emb|CU929273.5|	170	1.00E-82	Zebrafish DNA sequence from clone CH73-106N3 in linkage group 3, complete sequence	.	.	.	.	.	.	.	.	pfam05832	DUF846	Eukaryotic protein of unknown function (DUF846). This family consists of several of unknown function from a variety of eukaryotic organisms.	.	.	.	.	.
ENSDARG00000093572	4	1.006227554	1.889175608	0.939969404	1.544688291	0.936878708	0.573493413	1.358738424	1.653209098	2.379826227	3.399281572	2.299454824	3.30280983	2.351702693	2.298326637	2.377929907	lamc3	protein_coding	chr5:33807610-33942327:+	gi|528479656|ref|XP_687343.5|	8560	0	PREDICTED: laminin subunit gamma-3 [Danio rerio]	gi|31096508|emb|BX296561.8|	372	0	Zebrafish DNA sequence from clone CH211-145F17 in linkage group 5, complete sequence	Q9Y6N6	1335	0	Laminin subunit gamma-3	.	.	.	.	pfam00055	Laminin_N	Laminin N-terminal (Domain VI).	GO:0014002|astrocyte development;GO:0007155|cell adhesion;GO:0000904|cell morphogenesis involved in differentiation;GO:0030198|extracellular matrix organization;GO:0060041|retina development in camera-type eye;GO:0007601|visual perception;	GO:0005604|basement membrane;GO:0005576|extracellular region;GO:0016020|membrane;GO:0005578|proteinaceous extracellular matrix;	GO:0005198|structural molecule activity;	K06247	LAMC3; laminin, gamma 3
ENSDARG00000093570	3	0	0.582536086	2.132841503	0.248740617	0.244646354	0.386579069	1.083949306	1.197970581	0.462510019	0.893222591	0	3.011682509	3.098404348	2.438800926	0.972488188	si:dkey-25o1.7	protein_coding	chr24:27341917-27344538:-	gi|169259808|ref|NP_001108573.1|	449	2.00E-55	chemokine CCL-CUb precursor [Danio rerio]	gi|94017487|emb|CR383669.17|	692	0	Zebrafish DNA sequence from clone DKEY-25O1 in linkage group 24, complete sequence	.	.	.	.	.	.	.	.	pfam00048	IL8	Small cytokines (intecrine/chemokine), interleukin-8 like. Includes a number of secreted growth factors and interferons involved in mitogenic, chemotactic, and inflammatory activity. Structure contains two highly conserved disulfide bonds.	.	.	.	.	.
ENSDARG00000017659	5	97.14317906	91.95553255	71.5948056	39.60889655	38.70148002	50.93790839	54.63375305	53.72910285	44.52946578	55.10027411	59.65304852	45.42196451	43.88042804	41.93194602	47.52690372	sps2	protein_coding	chr23:18634523-18642179:-	gi|157276601|ref|NP_001004295.2|	2093	0	selenide, water dikinase 2 [Danio rerio]	gi|157276600|ref|NM_001004295.2|	3429	0	Danio rerio selenophosphate synthetase 2 (sps2), mRNA	A1YIZ1	602	0	Selenide, water dikinase 2	MK1369	176	5.00E-47	COG0709	pfam00586	AIRS	AIR synthase related protein, N-terminal domain. This family includes Hydrogen expression/formation protein HypE, AIR synthases EC:6.3.3.1, FGAM synthase EC:6.3.5.3 and selenide, water dikinase EC:2.7.9.3. The N-terminal domain of AIR synthase forms the dimer interface of the protein, and is suggested as a putative ATP binding domain.	.	.	GO:0005524|ATP binding;GO:0004756|selenide, water dikinase activity;	K01008	selD, SEPHS; selenide, water dikinase [EC:2.7.9.3]
ENSDARG00000022165	1	35.71601923	54.19826473	41.92239419	25.16198271	37.17995604	26.68366971	32.70855281	31.52361008	28.74805846	31.98854004	44.97640534	20.22386117	32.88270984	43.44417648	42.01169335	mgst1.2	protein_coding	chr4:12720116-12726664:-	gi|589269163|ref|NP_001002215.2|	812	4.00E-101	microsomal glutathione S-transferase 1.2 [Danio rerio]	gi|589269162|ref|NM_001002215.2|	2149	0	Danio rerio microsomal glutathione S-transferase 1.2 (mgst1.2), mRNA	P79382	188	4.00E-54	Microsomal glutathione S-transferase 1	.	.	.	.	pfam01124	MAPEG	MAPEG family. This family is has been called MAPEG (Membrane Associated Proteins in Eicosanoid and Glutathione metabolizm). It includes proteins such as Prostaglandin E synthase. This enzyme catalyses the synthesis of PGE2 from PGH2 (produced by cyclooxygenase from arachidonic acid). Because of structural similarities in the active sites of FLAP, LTC4 synthase and PGE synthase, substrates for eac…	GO:0070207|protein homotrimerization;	GO:0005783|endoplasmic reticulum;GO:0005789|endoplasmic reticulum membrane;GO:0016021|integral component of membrane;GO:0005741|mitochondrial outer membrane;	GO:0004364|glutathione transferase activity;	K00799	GST, gst; glutathione S-transferase [EC:2.5.1.18]
ENSDARG00000022160	4	1.336678065	1.19398389	2.28448093	0.819363894	1.063757891	0.339576153	0.666508757	0.420925263	0.452706318	1.62959228	0.944300888	0.405268336	0.864533407	1.150063367	0.993061499	ttc23	protein_coding	chr18:20836349-20864682:+	gi|528507999|ref|XP_005159212.1|	2206	0	PREDICTED: tetratricopeptide repeat protein 23 isoform X2 [Danio rerio]	gi|54262081|emb|BX470160.9|	484	0	Zebrafish DNA sequence from clone DKEY-25F3 in linkage group 18, complete sequence	Q2KHY7	248	2.00E-73	Tetratricopeptide repeat protein 23	MA0188	54.3	8.00E-07	COG0457	pfam13424	TPR_12	Tetratricopeptide repeat.	GO:0071391|cellular response to estrogen stimulus;GO:0071356|cellular response to tumor necrosis factor;GO:0072674|multinuclear osteoclast differentiation;GO:0034241|positive regulation of macrophage fusion;GO:0045672|positive regulation of osteoclast differentiation;GO:0090290|positive regulation of osteoclast proliferation;	GO:0016021|integral component of membrane;	.	.	.
ENSDARG00000043154	5	39.45351396	47.59024725	46.27245307	118.1772466	96.87317757	106.0896632	79.88923297	82.40473498	85.63991299	77.48987221	56.71026335	62.05713927	57.58430466	50.2473659	36.98861578	ucp2	protein_coding	chr10:36718882-36729630:+	gi|56790260|ref|NP_571251.1|	1662	0	mitochondrial uncoupling protein 2 [Danio rerio]	gi|34784523|gb|BC056737.1|	1423	0	Danio rerio uncoupling protein 2, mRNA (cDNA clone MGC:65762 IMAGE:6797447), complete cds	Q9W720	188	3.00E-56	Mitochondrial uncoupling protein 2	.	.	.	.	pfam00153	Mito_carr	Mitochondrial carrier protein.	GO:0006839|mitochondrial transport;GO:0006412|translation;	GO:0016021|integral component of membrane;GO:0005743|mitochondrial inner membrane;	GO:0003735|structural constituent of ribosome;	.	.
ENSDARG00000012609	3	18.09570268	0.203373233	0.522428799	0.309365969	1.93774377	0.219312134	0.141909411	0.017426327	0.034600735	0.17990721	0	0.03355626	0.095444606	0.840223805	1.400487532	hpx	protein_coding	chr9:33029368-33046387:-	gi|688571288|ref|XP_009302995.1|	2170	0	PREDICTED: hemopexin isoform X1 [Danio rerio]	gi|162287364|ref|NM_001111147.1|	2034	0	Danio rerio hemopexin (hpx), mRNA	Q6PHG2	208	2.00E-62	Hemopexin	.	.	.	.	pfam03619	Solute_trans_a	Organic solute transporter Ostalpha. This family is a transmembrane organic solute transport protein. In vertebrates these proteins form a complex with Ostbeta, and function as bile transporters. In plants they may transport brassinosteroid-like compounds and act as regulators of cell death.	GO:0006879|cellular iron ion homeostasis;GO:0071391|cellular response to estrogen stimulus;	GO:0005623|cell;GO:0005576|extracellular region;	GO:0015232|heme transporter activity;GO:0046872|metal ion binding;	.	.
ENSDARG00000043406	6	4.024940948	7.18665787	4.894972386	2.373009075	2.043854011	3.694946369	2.973112658	1.693148586	5.213670826	4.414403499	3.077346242	2.072249315	1.401493578	1.715749404	2.529071329	slc8a1b	protein_coding	chr17:22291577-22482134:+	gi|85362713|ref|NP_001034233.1|	4609	0	sodium/calcium exchanger 1 precursor [Danio rerio]	gi|171222381|gb|EU559286.1|	4140	0	Danio rerio sodium/calcium exchanger 1 isoform b (slc8a1b) mRNA, complete cds	P48766	1415	0	Sodium/calcium exchanger 1	.	.	.	.	pfam03160	Calx-beta	Calx-beta domain.	GO:0055074|calcium ion homeostasis;GO:0070588|calcium ion transmembrane transport;GO:0006816|calcium ion transport;GO:0007154|cell communication;GO:0002026|regulation of the force of heart contraction;GO:0055119|relaxation of cardiac muscle;GO:0035725|sodium ion transmembrane transport;	GO:0016021|integral component of membrane;GO:0014704|intercalated disc;GO:0031226|intrinsic component of plasma membrane;GO:0042383|sarcolemma;GO:0030315|T-tubule;GO:0030018|Z disc;	GO:0005509|calcium ion binding;GO:0005432|calcium:sodium antiporter activity;	K05849	SLC8A, NCX; solute carrier family 8 (sodium/calcium exchanger)
ENSDARG00000043403	1	15.25938692	17.84343807	16.09601331	11.54523531	11.67062335	14.52957963	30.46342986	28.05137973	28.59207628	28.63775668	37.46416399	36.68156701	28.71106728	48.92537728	20.23222231	paox1	protein_coding	chr8:15201844-15212560:+	gi|165972501|ref|NP_001107075.1|	2546	0	uncharacterized protein LOC564675 [Danio rerio]	gi|165972500|ref|NM_001113603.1|	2112	0	Danio rerio si:dkey-7o6.3 (si:dkey-7o6.3), mRNA	Q865R1	196	9.00E-57	Peroxisomal N(1)-acetyl-spermine/spermidine oxidase	.	.	.	.	pfam01593	Amino_oxidase	Flavin containing amine oxidoreductase. This family consists of various amine oxidases, including maze polyamine oxidase (PAO) and various flavin containing monoamine oxidases (MAO). The aligned region includes the flavin binding site of these enzymes. The family also contains phytoene dehydrogenases and related enzymes. In vertebrates MAO plays an important role regulating the intracellular leve…	GO:0006598|polyamine catabolic process;GO:0046208|spermine catabolic process;	GO:0005737|cytoplasm;GO:0005634|nucleus;	GO:0052895|N1-acetylspermine:oxygen oxidoreductase (N1-acetylspermidine-forming) activity;GO:0052894|norspermine:oxygen oxidoreductase activity;GO:0046592|polyamine oxidase activity;GO:0052901|spermine:oxygen oxidoreductase (spermidine-forming) activity;	K00308	PAOX; N1-acetylpolyamine oxidase [EC:1.5.3.13]
ENSDARG00000012600	1	16.95342009	22.29392918	17.90745755	12.20649816	21.92842324	16.6159331	14.8900828	20.10132322	31.89381707	16.99681044	17.26084519	16.95613846	13.24310352	19.21001199	21.06012837	HELZ2	protein_coding	chr2:42099143-42134146:-	gi|125806827|ref|XP_699251.2|	14812	0	PREDICTED: helicase with zinc finger domain 2 isoform X1 [Danio rerio]	gi|51035881|emb|BX663525.6|	4068	0	Zebrafish DNA sequence from clone DKEY-97A13 in linkage group 2, complete sequence	E9QAM5	352	1.00E-95	Helicase with zinc finger domain 2	YMR080c	204	3.00E-52	COG1112	pfam13087	AAA_12	AAA domain. This family of domains contain a P-loop motif that is characteristic of the AAA superfamily. Many of the proteins in this family are conjugative transfer proteins.	GO:0044255|cellular lipid metabolic process;GO:0045944|positive regulation of transcription from RNA polymerase II promoter;GO:0006351|transcription, DNA-templated;	GO:0016020|membrane;GO:0005654|nucleoplasm;	GO:0005524|ATP binding;GO:0003677|DNA binding;GO:0004386|helicase activity;GO:0030374|ligand-dependent nuclear receptor transcription coactivator activity;GO:0046872|metal ion binding;GO:0044822|poly(A) RNA binding;	.	.
ENSDARG00000055290	5	45.99406543	56.98908806	60.12281004	41.87893916	51.42763113	52.4991694	72.29284808	78.32062413	74.54681709	77.70833076	95.7035685	129.9346213	98.86482532	156.6349937	65.17643802	mpeg1.1	protein_coding	chr8:29700878-29704389:-	gi|47086567|ref|NP_997902.1|	3412	0	macrophage expressed 1, tandem duplicate 1 precursor [Danio rerio]	gi|47086566|ref|NM_212737.1|	2523	0	Danio rerio macrophage expressed 1, tandem duplicate 1 (mpeg1.1), mRNA	Q2M385	656	0	Macrophage-expressed gene 1 protein	.	.	.	.	pfam01823	MACPF	MAC/Perforin domain. The membrane-attack complex (MAC) of the complement system forms transmembrane channels. These channels disrupt the phospholipid bilayer of target cells, leading to cell lysis and death. A number of proteins participate in the assembly of the MAC. Freshly activated C5b binds to C6 to form a C5b-6 complex, then to C7 forming the C5b-7 complex. The C5b-7 complex binds to C8, wh…	.	GO:0016021|integral component of membrane;	.	.	.
ENSDARG00000055560	6	3.40044938	3.170856049	4.708773319	3.180770638	3.569037118	4.177504095	5.986911555	6.760519192	8.948870924	8.909967928	6.539882148	9.555842069	5.908659659	7.906352157	5.911332798	p2ry8	protein_coding	chr9:35075514-35076933:-	gi|528490619|ref|XP_694859.3|	1557	0	PREDICTED: P2Y purinoceptor 8 [Danio rerio]	gi|50284448|emb|BX601644.6|	1420	0	Zebrafish DNA sequence from clone DKEY-21O13 in linkage group 9, complete sequence	Q5ZI82	272	5.00E-85	P2Y purinoceptor 8	.	.	.	.	pfam00001	7tm_1	7 transmembrane receptor (rhodopsin family). This family contains, amongst other G-protein-coupled receptors (GCPRs), members of the opsin family, which have been considered to be typical members of the rhodopsin superfamily. They share several motifs, mainly the seven transmembrane helices, GCPRs of the rhodopsin superfamily. All opsins bind a chromophore, such as 11-cis-retinal. The function of…	GO:0007596|blood coagulation;	GO:0016021|integral component of membrane;GO:0005886|plasma membrane;	GO:0045028|G-protein coupled purinergic nucleotide receptor activity;GO:0015057|thrombin receptor activity;	K08386	P2RY8; purinergic receptor P2Y, G protein-coupled, 8
ENSDARG00000055566	6	8.559482264	7.548873558	7.511545161	5.131999685	5.766098699	2.06781902	2.933545344	3.64262474	3.483760944	6.91084067	5.561985131	5.361688731	4.683037278	7.429875514	7.297696417	mastl	protein_coding	chr24:5863797-5878951:+	gi|269914097|ref|NP_001003609.2|	4611	0	serine/threonine-protein kinase greatwall [Danio rerio]	gi|269914096|ref|NM_001003609.2|	3328	0	Danio rerio microtubule associated serine/threonine kinase-like (mastl), mRNA	Q6DBX4	1750	0	Serine/threonine-protein kinase greatwall	.	.	.	.	pfam00069	Pkinase	Protein kinase domain.	GO:0051301|cell division;GO:0006974|cellular response to DNA damage stimulus;GO:0000086|G2/M transition of mitotic cell cycle;GO:0035556|intracellular signal transduction;GO:0007067|mitotic nuclear division;GO:0034048|negative regulation of protein phosphatase type 2A activity;GO:0018105|peptidyl-serine phosphorylation;GO:0002574|thrombocyte differentiation;	GO:0005813|centrosome;GO:0032154|cleavage furrow;GO:0005737|cytoplasm;GO:0005634|nucleus;	GO:0005524|ATP binding;GO:0051721|protein phosphatase 2A binding;GO:0004674|protein serine/threonine kinase activity;	.	.
ENSDARG00000055565	4	1.838395266	1.100735522	1.452459562	2.078577545	2.008498184	3.022607338	1.024092356	1.365986327	0.81366767	0.946866755	0.963111123	1.240023537	1.050980343	0.846798213	0.944528107	cacnb2b	protein_coding	chr2:31479919-31530139:+	gi|261490805|ref|NP_001075217.2|	1781	0	calcium channel, voltage-dependent, beta 2b isoform 1 [Danio rerio]	gi|169642681|gb|BC160620.1|	3008	0	Danio rerio calcium channel, voltage-dependent, beta 2b, mRNA (cDNA clone MGC:172001 IMAGE:7260903), complete cds	Q8R0S4	468	4.00E-152	Voltage-dependent L-type calcium channel subunit beta-4	.	.	.	.	pfam00625	Guanylate_kin	Guanylate kinase.	GO:0007628|adult walking behavior;GO:0006816|calcium ion transport;GO:0046058|cAMP metabolic process;GO:0006874|cellular calcium ion homeostasis;GO:0050908|detection of light stimulus involved in visual perception;GO:0014051|gamma-aminobutyric acid secretion;GO:0007214|gamma-aminobutyric acid signaling pathway;GO:0048747|muscle fiber development;GO:0050877|neurological system process;GO:0007528|n…	GO:0005886|plasma membrane;GO:0005891|voltage-gated calcium channel complex;	GO:0008331|high voltage-gated calcium channel activity;GO:0005245|voltage-gated calcium channel activity;	K04863	CACNB2; voltage-dependent calcium channel beta-2
ENSDARG00000090537	6	4.900229274	4.968865365	4.610545439	3.296818655	4.357991396	8.061343584	8.326306561	8.891653537	10.95716478	6.294604208	5.673948551	8.017365353	5.591469772	7.077248301	6.470478582	ifit11	protein_coding	chr12:16898031-16902205:-	gi|528495753|ref|XP_005169508.1|	2370	0	PREDICTED: interferon-induced protein with tetratricopeptide repeats 5-like isoform X1 [Danio rerio]	gi|37650855|emb|BX000534.11|	2308	0	Zebrafish DNA sequence from clone DKEY-26G8 in linkage group 12, complete sequence	Q13325	219	3.00E-61	Interferon-induced protein with tetratricopeptide repeats 5	.	.	.	.	pfam13414	TPR_11	TPR repeat.	GO:0051607|defense response to virus;GO:0045087|innate immune response;	GO:0015629|actin cytoskeleton;GO:0045177|apical part of cell;GO:0043231|intracellular membrane-bounded organelle;GO:0005886|plasma membrane;GO:0032587|ruffle membrane;	GO:0044822|poly(A) RNA binding;GO:0003723|RNA binding;GO:0003727|single-stranded RNA binding;GO:0000049|tRNA binding;	.	.
ENSDARG00000092026	6	147.0390703	0.1024999	180.9167948	2.806562328	135.2579535	0.459137447	0.286088787	1.317427658	0	102.4424099	0.047288133	0.050736961	34.49055581	24.74769961	28.24981275	zgc:173545	protein_coding	chr11:18076373-18090251:-	gi|528494065|ref|XP_002663814.3|	1554	0	PREDICTED: uncharacterized protein LOC100334068 [Danio rerio]	gi|167555171|ref|NM_001114478.1|	1023	0	Danio rerio zgc:173545 (zgc:173545), mRNA	.	.	.	.	.	.	.	.	pfam03154	Atrophin-1	Atrophin-1 family. Atrophin-1 is the protein product of the dentatorubral-pallidoluysian atrophy (DRPLA) gene. DRPLA OMIM:125370 is a progressive neurodegenerative disorder. It is caused by the expansion of a CAG repeat in the DRPLA gene on chromosome 12p. This results in an extended polyglutamine region in atrophin-1, that is thought to confer toxicity to the protein, possibly through altering i…	.	.	.	.	.
ENSDARG00000098700	6	1.627369612	1.032383397	1.854196081	5.301284397	4.070303715	11.19790703	2.285326454	2.635535279	2.253084523	7.293506005	9.755694316	5.321707071	2.639718998	5.047676127	1.83861048	il1b	protein_coding	chr10:45109897-45117159:+	gi|528493143|ref|XP_005155537.1|	1462	0	PREDICTED: interleukin-1 beta isoform X1 [Danio rerio]	gi|498917175|ref|NM_212844.2|	1688	0	Danio rerio interleukin 1, beta (il1b), mRNA	Q9YGD3	101	2.00E-22	Interleukin-1 beta	.	.	.	.	pfam00340	IL1	Interleukin-1 / 18. This family includes interleukin-1 and interleukin-18.	GO:0043400|cortisol secretion;GO:0001660|fever generation;GO:0006955|immune response;GO:0051781|positive regulation of cell division;GO:0010628|positive regulation of gene expression;GO:0002690|positive regulation of leukocyte chemotaxis;GO:0050766|positive regulation of phagocytosis;GO:0001934|positive regulation of protein phosphorylation;GO:0051924|regulation of calcium ion transport;GO:004209…	GO:0005776|autophagosome;GO:0031410|cytoplasmic vesicle;GO:0005829|cytosol;GO:0070062|extracellular exosome;GO:0005615|extracellular space;GO:0005764|lysosome;	.	.	.
ENSDARG00000097504	3	1.177029949	0.043841272	0.170872096	0.126360343	0.400459247	0.116374719	0.013596215	0.045079228	0.014917796	0.015513076	0.013484058	0.086804882	0.137166952	0.202862775	0.301903818	si:ch211-212c13.7p	unprocessed_pseudogene	chr15:21244362-21262554:+	gi|528501658|ref|XP_001345541.5|	6391	0	PREDICTED: alpha-2-macroglobulin [Danio rerio]	gi|213385250|ref|NM_001139479.1|	4217	0	Danio rerio alpha-2-macroglobulin-like (a2ml), mRNA	P20742	102	3.00E-20	Pregnancy zone protein	TM0984	74.7	2.00E-12	COG2373	pfam07678	A2M_comp	A-macroglobulin complement component. This family includes the complement components region of the alpha-2-macroglobulin family.	GO:0007565|female pregnancy;	GO:0072562|blood microparticle;GO:0070062|extracellular exosome;GO:0005576|extracellular region;	GO:0004866|endopeptidase inhibitor activity;GO:0004867|serine-type endopeptidase inhibitor activity;	.	.
ENSDARG00000098706	4	1.703495722	0.918202693	0.399277609	0.561371433	1.005667683	0.955543536	3.300585212	2.21012295	1.640285298	2.281703101	4.890782202	2.231211018	2.840151332	6.621376674	1.979207316	si:ch73-236c18.7	protein_coding	chr1:57734605-57740036:+	gi|688535083|ref|XP_009294090.1|	4941	0	PREDICTED: protein NLRC3-like [Danio rerio]	gi|194578838|ref|NM_001130673.1|	2247	0	Danio rerio zgc:194906 (zgc:194906), mRNA	P59046	65.5	2.00E-10	NACHT, LRR and PYD domains-containing protein 12	.	.	.	.	pfam05729	NACHT	NACHT domain. This NTPase domain is found in apoptosis proteins as well as those involved in MHC transcription activation. This family is closely related to pfam00931.	GO:0007249|I-kappaB kinase/NF-kappaB signaling;GO:0043124|negative regulation of I-kappaB kinase/NF-kappaB signaling;GO:0032715|negative regulation of interleukin-6 production;GO:0032088|negative regulation of NF-kappaB transcription factor activity;GO:0032720|negative regulation of tumor necrosis factor production;GO:0042110|T cell activation;	GO:0005737|cytoplasm;	GO:0005524|ATP binding;	.	.
ENSDARG00000057296	4	1.722937756	0.810795124	2.831766824	0.333841816	0.474278697	0.076864993	0.862103122	0.516093643	0.945901374	2.336160687	1.104364018	0.802679428	0.61606757	1.110202656	1.268948235	cbln1	protein_coding	chr18:18115169-18120966:+	gi|528507815|ref|XP_005159137.1|	1021	2.00E-133	PREDICTED: cerebellin-1 isoform X1 [Danio rerio]	gi|159132367|emb|CU464133.10|	1068	0	Zebrafish DNA sequence from clone CH211-235C20 in linkage group 18, complete sequence	Q9R171	238	2.00E-75	Cerebellin-1	.	.	.	.	pfam00386	C1q	C1q domain. C1q is a subunit of the C1 enzyme complex that activates the serum complement system.	GO:0021707|cerebellar granule cell differentiation;GO:0007157|heterophilic cell-cell adhesion via plasma membrane cell adhesion molecules;GO:0051965|positive regulation of synapse assembly;GO:0009306|protein secretion;	GO:0030054|cell junction;GO:0005576|extracellular region;GO:0045211|postsynaptic membrane;GO:0045202|synapse;	GO:0042803|protein homodimerization activity;	.	.
ENSDARG00000053973	4	36.01273389	1.929761315	2.820478928	1.969876169	7.407904968	1.200577983	1.421353482	0.992126213	0.533517282	1.237645818	0.296763898	0.238805659	1.962245291	4.624159209	4.19053397	fetub	protein_coding	chr22:37934447-37944777:+	gi|326678863|ref|XP_001922687.3|	1367	0	PREDICTED: histidine-rich glycoprotein [Danio rerio]	gi|528516830|ref|XM_001922652.5|	1647	0	PREDICTED: Danio rerio fetuin B (fetub), mRNA	Q9UGM5	161	1.00E-42	Fetuin-B	.	.	.	.	pfam00031	Cystatin	Cystatin domain. Very diverse family. Attempts to define separate sub-families failed. Typically, either the N-terminal or C-terminal end is very divergent. But splitting into two domains would make very short families. pfam00666 are related to this family but have not been included.	GO:0007339|binding of sperm to zona pellucida;GO:0010951|negative regulation of endopeptidase activity;GO:0007338|single fertilization;	GO:0070062|extracellular exosome;GO:0005576|extracellular region;GO:0005615|extracellular space;	GO:0004869|cysteine-type endopeptidase inhibitor activity;GO:0008191|metalloendopeptidase inhibitor activity;	.	.
ENSDARG00000007813	1	11.21076844	12.41362824	12.05766397	16.45004613	15.16807395	17.28352064	6.820048449	8.582793676	9.421989825	10.59316187	10.88624402	9.27000148	6.830260251	5.066715889	6.431388549	RNPEPL1	protein_coding	chr18:45866860-45888825:+	gi|326676259|ref|XP_003200537.1|	3565	0	PREDICTED: arginyl aminopeptidase-like 1 [Danio rerio]	gi|597788859|ref|XM_007257773.1|	748	0	PREDICTED: Astyanax mexicanus arginyl aminopeptidase-like 1-like (LOC103032806), mRNA	Q9HAU8	697	0	Arginyl aminopeptidase-like 1	XF1488	261	1.00E-74	COG0308	pfam01433	Peptidase_M1	Peptidase family M1. Members of this family are aminopeptidases. The members differ widely in specificity, hydrolysing acidic, basic or neutral N-terminal residues. This family includes leukotriene-A4 hydrolase, this enzyme also has an aminopeptidase activity.	GO:0043171|peptide catabolic process;GO:0006508|proteolysis;	GO:0005737|cytoplasm;GO:0005886|plasma membrane;	GO:0070006|metalloaminopeptidase activity;GO:0042277|peptide binding;GO:0008270|zinc ion binding;	K09605	RNPEPL1; arginyl aminopeptidase-like 1 [EC:3.4.11.-]
ENSDARG00000092028	3	0.288983306	0.029500974	0.313583291	0.070856998	0.055752555	0	0.288191913	0.242671994	0.331262149	0.219215072	0.176932831	0.394276707	0.4845761	0.263263886	0.207769426	si:dkey-4c23.3	protein_coding	chr22:24861239-24872497:-	gi|688609513|ref|XP_009294676.1|	7801	0	PREDICTED: vitellogenin [Danio rerio]	gi|42627555|emb|AL929032.10|	281	3.00E-143	Zebrafish DNA sequence from clone DKEY-4C23 in linkage group 22, complete sequence	Q92093	399	1.00E-113	Vitellogenin	.	.	.	.	pfam01347	Vitellogenin_N	Lipoprotein amino terminal region. This family contains regions from: Vitellogenin, Microsomal triglyceride transfer protein and apolipoprotein B-100. These proteins are all involved in lipid transport. This family contains the LV1n chain from lipovitellin, that contains two structural domains.	GO:0034605|cellular response to heat;GO:0032355|response to estradiol;GO:0032868|response to insulin;GO:1903165|response to polycyclic arene;	GO:0005829|cytosol;GO:0005615|extracellular space;GO:0060417|yolk;	GO:0005319|lipid transporter activity;GO:0045735|nutrient reservoir activity;GO:0005102|receptor binding;	.	.
ENSDARG00000056210	4	2.354737076	0.786712101	1.11499041	1.637624487	0.836309028	1.174664518	0.579447818	0.64040028	0.970387889	0.904719516	0.967861662	1.135804637	0.861489945	0.097507557	0.554065516	si:ch211-199o1.2	protein_coding	chr8:24948959-24951651:-	gi|153792281|ref|NP_001093532.1|	3198	0	uncharacterized protein LOC798846 [Danio rerio]	gi|153792280|ref|NM_001100062.1|	2020	0	Danio rerio si:ch211-199o1.2 (si:ch211-199o1.2), mRNA	Q91233	1095	0	Heat shock 70 kDa protein	.	.	.	.	pfam00012	HSP70	Hsp70 protein. Hsp70 chaperones help to fold many proteins. Hsp70 assisted folding involves repeated cycles of substrate binding and release. Hsp70 activity is ATP dependent. Hsp70 proteins are made up of two regions: the amino terminus is the ATPase domain and the carboxyl terminus is the substrate binding region.	.	GO:0005737|cytoplasm;GO:0005634|nucleus;	GO:0005524|ATP binding;	.	.
ENSDARG00000056213	6	7.814058009	3.615480078	6.807790509	2.03450228	3.51397657	1.696635828	3.411791036	2.70851617	2.688938628	7.456634626	4.09850156	4.346281617	3.345065426	3.636124223	4.268100459	si:ch73-130a3.4	protein_coding	chr19:30266910-30273021:+	gi|111306561|gb|AAI21761.1|	1196	1.00E-163	LOC553397 protein [Danio rerio]	gi|111306560|gb|BC121760.1|	861	0	Danio rerio hypothetical protein LOC553397, mRNA (cDNA clone IMAGE:7424043), partial cds	Q8TBB0	70.1	6.00E-13	THAP domain-containing protein 6	.	.	.	.	pfam05485	THAP	THAP domain. The THAP domain is a putative DNA-binding domain (DBD) and probably also binds a zinc ion. It features the conserved C2CH architecture (consensus sequence: Cys - 2-4 residues - Cys - 35-50 residues - Cys - 2 residues - His). Other universal features include the location of the domain at the N-termini of proteins, its size of about 90 residues, a C-terminal AVPTIF box and several othe…	.	GO:0015630|microtubule cytoskeleton;	GO:0003677|DNA binding;GO:0046872|metal ion binding;	.	.
ENSDARG00000056218	4	2.390531505	1.601276209	1.598585617	1.174598308	1.748232052	2.240137272	0.785154783	0.800996016	0.883562558	2.320021061	1.916745645	1.70307065	0.751491112	0.986971912	1.18870592	tnika	protein_coding	chr2:26002462-26160855:+	gi|528471033|ref|XP_005163447.1|	4016	0	PREDICTED: TRAF2 and NCK interacting kinase a isoform X4 [Danio rerio]	gi|41054390|ref|NM_199703.1|	4401	0	Danio rerio TRAF2 and NCK interacting kinase a (tnika), mRNA	P83510	1151	0	Traf2 and NCK-interacting protein kinase	.	.	.	.	pfam00780	CNH	CNH domain. Domain found in NIK1-like kinase, mouse citron and yeast ROM1, ROM2. Unpublished observations.	GO:0031532|actin cytoskeleton reorganization;GO:0007256|activation of JNKK activity;GO:0007010|cytoskeleton organization;GO:0035556|intracellular signal transduction;GO:0030033|microvillus assembly;GO:0002230|positive regulation of defense response to virus by host;GO:0001934|positive regulation of protein phosphorylation;GO:0046777|protein autophosphorylation;GO:0072659|protein localization to p…	GO:0016324|apical plasma membrane;GO:0005737|cytoplasm;GO:0005856|cytoskeleton;GO:0070062|extracellular exosome;GO:0005654|nucleoplasm;GO:0005634|nucleus;GO:0048471|perinuclear region of cytoplasm;GO:0055037|recycling endosome;	GO:0005524|ATP binding;GO:0004672|protein kinase activity;GO:0004674|protein serine/threonine kinase activity;GO:0004702|receptor signaling protein serine/threonine kinase activity;	K08840	TNIK; TRAF2 and NCK interacting kinase [EC:2.7.11.1]
ENSDARG00000052775	3	0.242861755	0.111566866	0.94872815	0.803901594	1.106937157	3.054039781	0.103798572	0.286793013	0.341664039	0.532946692	0	0.220900264	0.261795897	0.055311784	0.209531469	opn3	protein_coding	chr13:42119161-42139525:+	gi|162287347|ref|NP_001104634.1|	1997	0	opsin-3 [Danio rerio]	gi|162287346|ref|NM_001111164.1|	1187	0	Danio rerio opsin 3 (opn3), mRNA	Q9H1Y3	415	3.00E-141	Opsin-3	.	.	.	.	pfam00001	7tm_1	7 transmembrane receptor (rhodopsin family). This family contains, amongst other G-protein-coupled receptors (GCPRs), members of the opsin family, which have been considered to be typical members of the rhodopsin superfamily. They share several motifs, mainly the seven transmembrane helices, GCPRs of the rhodopsin superfamily. All opsins bind a chromophore, such as 11-cis-retinal. The function of…	GO:0071482|cellular response to light stimulus;GO:0009583|detection of light stimulus;GO:0007186|G-protein coupled receptor signaling pathway;GO:0007602|phototransduction;GO:0018298|protein-chromophore linkage;GO:0042752|regulation of circadian rhythm;	GO:0016021|integral component of membrane;GO:0005887|integral component of plasma membrane;	GO:0008020|G-protein coupled photoreceptor activity;GO:0004930|G-protein coupled receptor activity;GO:0009881|photoreceptor activity;	K04256	OPN3; c-opsin
ENSDARG00000077866	4	3.627645587	3.752673431	2.59805861	1.019933911	0.886500966	1.105901531	1.332236476	0.761573393	1.360923538	1.755933277	1.457927336	0.928777713	1.52942686	1.346394424	1.066446429	nostrin	protein_coding	chr9:49137956-49167457:-	gi|165972371|ref|NP_001107076.1|	2800	0	nostrin [Danio rerio]	gi|165972370|ref|NM_001113604.1|	1729	0	Danio rerio nitric oxide synthase trafficking (nostrin), mRNA	Q8IVI9	436	2.00E-141	Nostrin	.	.	.	.	pfam07653	SH3_2	Variant SH3 domain. SH3 (Src homology 3) domains are often indicative of a protein involved in signal transduction related to cytoskeletal organisation. First described in the Src cytoplasmic tyrosine kinase. The structure is a partly opened beta barrel.	GO:0006897|endocytosis;GO:0045892|negative regulation of transcription, DNA-templated;GO:0050999|regulation of nitric-oxide synthase activity;GO:0007165|signal transduction;	GO:0005856|cytoskeleton;GO:0030666|endocytic vesicle membrane;GO:0005634|nucleus;GO:0005886|plasma membrane;	GO:0003677|DNA binding;	.	.
ENSDARG00000090286	3	11.96061044	0.120317871	0.255785959	0.616503092	2.842291265	0.51899001	0.29850734	0.206192191	0.163761443	0.127722133	0.037005613	0.079409029	0.639949051	1.19300584	1.468782603	serpina1	protein_coding	chr20:10556860-10560171:+	gi|528511034|ref|XP_005160462.1|	2066	0	PREDICTED: serine proteinase inhibitor, clade A, member 1 isoform X1 [Danio rerio]	gi|324021701|ref|NM_001013259.3|	1508	0	Danio rerio serine (or cysteine) proteinase inhibitor, clade A (alpha-1 antiproteinase, antitrypsin), member 1, like (serpina1l), mRNA	P32759	600	0	Alpha-1-antitrypsin homolog	all0778	184	3.00E-51	COG4826	pfam00079	Serpin	Serpin (serine protease inhibitor). Structure is a multi-domain fold containing a bundle of helices and a beta sandwich.	.	GO:0005615|extracellular space;	GO:0004867|serine-type endopeptidase inhibitor activity;	.	.
ENSDARG00000078959	1	36.24600086	25.09279317	24.82837708	9.155444622	9.738828864	8.712618369	14.60003835	14.0855635	15.9134558	19.68222872	15.41145581	12.66435813	21.38924697	18.61554121	17.28935767	gb:eh507706	protein_coding	chr11:30400352-30414570:+	gi|294489266|ref|NP_001170916.1|	3897	0	two pore channel 3 [Danio rerio]	gi|302632523|ref|NM_001177445.2|	2523	0	Danio rerio expressed sequence EH507706 (gb:eh507706), mRNA	Q9EQJ0	197	9.00E-52	Two pore calcium channel protein 1	BH1501	80.1	1.00E-15	COG1226	pfam00520	Ion_trans	Ion transport protein. This family contains Sodium, Potassium, Calcium ion channels. This family is 6 transmembrane helices in which the last two helices flank a loop which determines ion selectivity. In some sub-families (e.g. Na channels) the domain is repeated four times, whereas in others (e.g. K channels) the protein forms as a tetramer in the membrane. A bacterial structure of the protein i…	GO:0086010|membrane depolarization during action potential;GO:0010508|positive regulation of autophagy;	GO:0010008|endosome membrane;GO:0016021|integral component of membrane;GO:0005765|lysosomal membrane;GO:0005886|plasma membrane;	GO:0042802|identical protein binding;GO:0072345|NAADP-sensitive calcium-release channel activity;GO:0005245|voltage-gated calcium channel activity;	K16896	TPCN1; two pore calcium channel protein 1
ENSDARG00000043680	6	14.30683466	9.286762207	8.667336381	4.476488051	5.523702849	5.733767456	5.49826696	8.549042373	11.86905727	9.483897431	11.85243923	15.85905065	5.3062513	4.174968481	4.907241552	ylpm1	protein_coding	chr20:9184562-9212259:-	gi|528511015|ref|XP_003200727.2|	4641	0	PREDICTED: YLP motif-containing protein 1 isoform X2 [Danio rerio]	gi|48675767|emb|BX942841.12|	2054	0	Zebrafish DNA sequence from clone CH211-59D15 in linkage group 20, complete sequence	P0CB49	57	2.00E-06	YLP motif-containing protein 1	.	.	.	.	pfam13671	AAA_33	AAA domain. This family of domains contain only a P-loop motif, that is characteristic of the AAA superfamily. Many of the proteins in this family are just short fragments so there is no Walker B motif.	GO:0006355|regulation of transcription, DNA-templated;GO:0006351|transcription, DNA-templated;	GO:0016607|nuclear speck;	.	.	.
ENSDARG00000104994	4	9.265097881	3.627937983	3.166946475	0.837301117	1.187399728	1.916625182	0.131996072	0.06252035	0.103447407	1.183329074	0.972453599	0.361168889	0.741923323	2.029741015	0.894517228	BX539332.1	protein_coding	chr22:24801020-24807425:+	gi|528488605|ref|XP_003199181.2|	1382	2.00E-169	PREDICTED: uncharacterized protein LOC794073 [Danio rerio]	gi|42627555|emb|AL929032.10|	1031	0	Zebrafish DNA sequence from clone DKEY-4C23 in linkage group 22, complete sequence	Q9P0U3	60.1	1.00E-07	Sentrin-specific protease 1	.	.	.	.	pfam02902	Peptidase_C48	Ulp1 protease family, C-terminal catalytic domain. This domain contains the catalytic triad Cys-His-Asn.	GO:0006919|activation of cysteine-type endopeptidase activity involved in apoptotic process;GO:0097190|apoptotic signaling pathway;GO:0032435|negative regulation of proteasomal ubiquitin-dependent protein catabolic process;GO:0045944|positive regulation of transcription from RNA polymerase II promoter;GO:0016926|protein desumoylation;GO:0016925|protein sumoylation;GO:0006508|proteolysis;GO:001072…	GO:0005737|cytoplasm;GO:0005925|focal adhesion;GO:0031965|nuclear membrane;GO:0005654|nucleoplasm;GO:0005634|nucleus;	GO:0004175|endopeptidase activity;GO:0070139|SUMO-specific endopeptidase activity;GO:0016929|SUMO-specific protease activity;	K08592	SENP1; sentrin-specific protease 1 [EC:3.4.22.68]
ENSDARG00000104995	6	5.154578229	5.171679883	3.489849042	2.623891531	2.03161675	2.226943093	3.432981761	2.658856894	2.432026296	3.115078739	2.573603192	3.911844165	3.217964385	4.263691547	3.574102115	ugt5b2	protein_coding	chr1:8961164-8968614:-	gi|688531268|ref|XP_009304001.1|	2784	0	PREDICTED: UDP glucuronosyltransferase 5 family, polypeptide B1 isoform X2 [Danio rerio]	gi|294610613|ref|NM_001177493.1|	2140	0	Danio rerio UDP glucuronosyltransferase 5 family, polypeptide B1 (ugt5b1), mRNA	Q8BWQ1	403	1.00E-129	UDP-glucuronosyltransferase 2A3	slr1125	67	7.00E-11	COG1819	pfam00201	UDPGT	UDP-glucoronosyl and UDP-glucosyl transferase.	GO:0052695|cellular glucuronidation;GO:0009813|flavonoid biosynthetic process;GO:0052696|flavonoid glucuronidation;	GO:0016021|integral component of membrane;GO:0043231|intracellular membrane-bounded organelle;	GO:0015020|glucuronosyltransferase activity;	K00699	UGT; glucuronosyltransferase [EC:2.4.1.17]
ENSDARG00000071461	1	18.57575474	7.129177356	13.43377006	18.67989282	19.4951815	27.52594324	15.07449891	23.99068003	19.18613575	34.05555441	31.99331459	30.79774903	26.15789442	41.02104198	32.35714496	igl3c3	processed_transcript	chr24:38323206-38325030:-	gi|528520450|ref|XP_003201397.2|	479	7.00E-58	PREDICTED: Ig kappa-b4 chain C region [Danio rerio]	gi|112418892|gb|BC122364.1|	532	0	Danio rerio cDNA clone IMAGE:7922315, partial cds	.	.	.	.	.	.	.	.	pfam07654	C1-set	Immunoglobulin C1-set domain.	.	.	.	.	.
ENSDARG00000078953	1	12.66169738	12.67098267	9.735972506	9.27507385	3.626156552	6.618801518	11.14875543	6.042870437	14.33893048	8.134497784	9.664946261	5.328277817	4.711963541	4.140087567	5.881287144	epn3a	protein_coding	chr3:49165972-49233877:+	gi|688544729|ref|XP_009298027.1|	2977	0	PREDICTED: epsin-3-like isoform X1 [Danio rerio]	gi|50724743|emb|BX682552.9|	3348	0	Zebrafish DNA sequence from clone DKEY-120C6 in linkage group 3, complete sequence	Q9H201	385	2.00E-115	Epsin-3	.	.	.	.	pfam01417	ENTH	ENTH domain. The ENTH (Epsin N-terminal homology) domain is found in proteins involved in endocytosis and cytoskeletal machinery. The function of the ENTH domain is unknown.	.	GO:0005905|coated pit;GO:0030136|clathrin-coated vesicle;GO:0070062|extracellular exosome;GO:0019897|extrinsic component of plasma membrane;GO:0043231|intracellular membrane-bounded organelle;GO:0005654|nucleoplasm;GO:0005634|nucleus;GO:0048471|perinuclear region of cytoplasm;	GO:0008289|lipid binding;	K12471	EPN; epsin
ENSDARG00000071463	4	0.935064437	1.272752237	1.420527787	0.917089084	0.932060286	1.55198214	4.499700499	1.308691232	2.208694103	1.891506887	1.438595437	1.323013186	2.150324322	2.997228913	2.151297152	zgc:154125	protein_coding	chr24:38646679-38657419:+	gi|528520453|ref|XP_005170695.1|	2180	0	PREDICTED: uncharacterized protein LOC768188 isoform X1 [Danio rerio]	gi|116268054|ref|NM_001077331.1|	1484	0	Danio rerio zgc:154125 (zgc:154125), mRNA	P12371	56.6	2.00E-07	High affinity immunoglobulin epsilon receptor subunit alpha	.	.	.	.	pfam13895	Ig_2	Immunoglobulin domain. This domain contains immunoglobulin-like domains.	GO:0006955|immune response;	GO:0005576|extracellular region;GO:0016021|integral component of membrane;GO:0005886|plasma membrane;	GO:0019768|high-affinity IgE receptor activity;GO:0019863|IgE binding;	K08089	FCER1A; Fc receptor, IgE, high affinity I, alpha polypeptide
ENSDARG00000071462	6	4.352281824	4.714671014	4.65884129	5.267731964	3.927019145	6.726751056	2.713065275	1.328656366	2.424204867	4.875053655	4.801341692	2.109009152	2.720716625	1.904551606	3.96814034	lama3	protein_coding	chr22:16356954-16374214:-	gi|528515924|ref|XP_005161783.1|	4885	0	PREDICTED: laminin subunit alpha-3 [Danio rerio]	gi|70910608|emb|CR936359.9|	197	1.00E-96	Zebrafish DNA sequence from clone CH73-264B7 in linkage group 22, complete sequence	Q16787	54.7	7.00E-06	Laminin subunit alpha-3	.	.	.	.	pfam06008	Laminin_I	Laminin Domain I. coiled-coil structure. It has been suggested that the domains I and II from laminin A, B1 and B2 may come together to form a triple helical coiled-coil structure.	GO:0007155|cell adhesion;GO:0035987|endodermal cell differentiation;GO:0008544|epidermis development;GO:0022617|extracellular matrix disassembly;GO:0030198|extracellular matrix organization;GO:0031581|hemidesmosome assembly;GO:0030155|regulation of cell adhesion;GO:0030334|regulation of cell migration;GO:0045995|regulation of embryonic development;	GO:0005604|basement membrane;GO:0070062|extracellular exosome;GO:0005576|extracellular region;GO:0005610|laminin-5 complex;	GO:0005198|structural molecule activity;	K06240	LAMA3_5; laminin, alpha 3/5
ENSDARG00000028396	5	47.24437274	70.63482375	105.3097208	469.54424	451.0394659	515.0495424	149.3752792	138.5702932	191.2638912	196.904244	104.994782	211.5584293	66.65115825	81.5933982	59.35928884	fkbp5	protein_coding	chr6:41098522-41118517:+	gi|528482862|ref|XP_005166078.1|	2405	0	PREDICTED: peptidyl-prolyl cis-trans isomerase FKBP5 isoform X1 [Danio rerio]	gi|47085912|ref|NM_213149.1|	2613	0	Danio rerio FK506 binding protein 5 (fkbp5), mRNA	Q13451	526	3.00E-177	Peptidyl-prolyl cis-trans isomerase FKBP5	slr1761	107	5.00E-25	COG0545	pfam00254	FKBP_C	FKBP-type peptidyl-prolyl cis-trans isomerase.	GO:0061077|chaperone-mediated protein folding;	GO:0005737|cytoplasm;	GO:0005528|FK506 binding;GO:0003755|peptidyl-prolyl cis-trans isomerase activity;	K09571	FKBP4_5; FK506-binding protein 4/5 [EC:5.2.1.8]
ENSDARG00000091222	1	11.32380717	14.62177803	12.18240089	8.765866659	9.858470672	18.06805695	11.402552	7.31792963	7.502583403	10.55015239	9.32234744	4.338786543	4.823500278	5.922321608	4.780157174	si:dkey-190l8.2	protein_coding	chr17:30574324-30588895:+	gi|688595008|ref|XP_009291426.1|	2470	0	PREDICTED: solute carrier family 22 member 8-like isoform X1 [Danio rerio]	gi|110623371|emb|CR407588.12|	2670	0	Zebrafish DNA sequence from clone DKEY-190L8 in linkage group 17, complete sequence	Q9TSY7	164	3.00E-40	Solute carrier family 22 member 6	.	.	.	.	pfam00083	Sugar_tr	Sugar (and other) transporter.	.	GO:0016021|integral component of membrane;GO:0005886|plasma membrane;	GO:0022857|transmembrane transporter activity;	K08203	SLC22A6, OAT1; MFS transporter, OCT family, solute carrier family 22 (organic anion transporter), member 6
ENSDARG00000052512	4	0.956318512	0.92744841	2.153281562	1.453798596	0.761059368	0.631664214	0.86287106	0.577201331	0.722515125	1.839503146	1.171030559	0.894002828	1.878484473	2.008614932	2.314789832	tsga10	protein_coding	chr1:49006592-49029586:+	gi|238650185|ref|NP_001070757.2|	3386	0	testis-specific gene 10 protein [Danio rerio]	gi|528469059|ref|XM_005160116.1|	2387	0	PREDICTED: Danio rerio testis specific, 10 (tsga10), transcript variant X1, mRNA	Q4R6W3	216	4.00E-61	Testis-specific gene 10 protein	.	.	.	.	pfam01576	Myosin_tail_1	Myosin tail. The myosin molecule is a multi-subunit complex made up of two heavy chains and four light chains it is a fundamental contractile protein found in all eukaryote cell types. This family consists of the coiled-coil myosin heavy chain tail region. The coiled-coil is composed of the tail from two molecules of myosin. These can then assemble into the macromolecular thick filament. The coil…	GO:0030031|cell projection assembly;GO:0007283|spermatogenesis;	GO:0005737|cytoplasm;GO:0031514|motile cilium;GO:0043005|neuron projection;GO:0031965|nuclear membrane;	GO:0005198|structural molecule activity;	.	.
ENSDARG00000100053	6	5.018748305	3.412190251	4.999404248	5.138849499	5.054264195	7.98651897	2.230801891	7.870510994	4.142160962	6.754864265	4.93535308	6.93866804	1.904328152	1.46306603	2.59798594	CABZ01044099.1	protein_coding	chr24:41654560-41756952:-	gi|66392196|ref|NP_001018143.1|	1013	2.00E-127	receptor-type tyrosine-protein phosphatase mu precursor [Danio rerio]	gi|63102381|gb|BC095203.1|	671	0	Danio rerio protein tyrosine phosphatase, receptor type, M, mRNA (cDNA clone MGC:110218 IMAGE:7295567), complete cds	P28828	207	6.00E-59	Receptor-type tyrosine-protein phosphatase mu	.	.	.	.	pfam00629	MAM	MAM domain. An extracellular domain found in many receptors.	GO:0007156|homophilic cell adhesion via plasma membrane adhesion molecules;GO:0016525|negative regulation of angiogenesis;GO:0010596|negative regulation of endothelial cell migration;GO:0001937|negative regulation of endothelial cell proliferation;GO:0031175|neuron projection development;GO:0045909|positive regulation of vasodilation;GO:0006470|protein dephosphorylation;GO:0042493|response to dru…	GO:0005913|cell-cell adherens junction;GO:0005911|cell-cell junction;GO:0005737|cytoplasm;GO:0016021|integral component of membrane;GO:0030027|lamellipodium;GO:0048471|perinuclear region of cytoplasm;	GO:0045296|cadherin binding;GO:0042802|identical protein binding;GO:0004725|protein tyrosine phosphatase activity;GO:0005001|transmembrane receptor protein tyrosine phosphatase activity;	K05693	PTPRM; receptor-type tyrosine-protein phosphatase mu [EC:3.1.3.48]
ENSDARG00000100051	5	146.0767435	141.6578686	225.9508301	204.0670454	256.6983273	122.7988734	459.5481265	250.0321794	493.3098266	170.8264267	152.964738	133.3481456	191.1617	228.2678124	164.491681	si:dkey-203a12.6	protein_coding	chr14:15189525-15190281:+	gi|326673570|ref|XP_003199924.1|	402	4.00E-48	PREDICTED: ovomucoid-like [Danio rerio]	gi|528499665|ref|XM_003199876.2|	399	0	PREDICTED: Danio rerio ovomucoid-like (LOC100537980), mRNA	P34953	60.5	2.00E-11	Serine protease inhibitor Kazal-type 2	.	.	.	.	pfam00050	Kazal_1	Kazal-type serine protease inhibitor domain. Usually indicative of serine protease inhibitors. However, kazal-like domains are also seen in the extracellular part of agrins, which are not known to be protease inhibitors. Kazal domains often occur in tandem arrays. Small alpha+beta fold containing three disulphides. Alignment also includes a single domain from transporters in the OATP/PGT family.	.	GO:0005576|extracellular region;	GO:0004867|serine-type endopeptidase inhibitor activity;	.	.
ENSDARG00000100057	1	12.25263982	11.68969834	9.310742921	11.47692816	9.895930228	16.62537744	8.447333594	8.924277258	15.67623742	10.11424413	9.530131196	7.165555817	7.635399223	5.477873129	7.082480366	ppfibp1b	protein_coding	chr18:15500495-15582944:-	gi|113678820|ref|NP_001038435.1|	4966	0	liprin-beta-1 [Danio rerio]	gi|113678819|ref|NM_001044970.1|	4094	0	Danio rerio si:dkey-103i16.1 (si:dkey-103i16.1), mRNA	Q86W92	1139	0	Liprin-beta-1	.	.	.	.	pfam00536	SAM_1	SAM domain (Sterile alpha motif). It has been suggested that SAM is an evolutionarily conserved protein binding domain that is involved in the regulation of numerous developmental processes in diverse eukaryotes. The SAM domain can potentially function as a protein interaction module through its ability to homo- and heterooligomerise with other SAM domains.	GO:0007155|cell adhesion;	GO:0005913|cell-cell adherens junction;GO:0005925|focal adhesion;GO:0005886|plasma membrane;	GO:0098641|cadherin binding involved in cell-cell adhesion;	.	.
ENSDARG00000016527	1	5.710885493	3.074844149	7.818752978	4.397316315	7.916833143	13.73833828	9.008724349	16.27244436	30.52426791	10.30876362	9.181684242	8.692345393	4.256328949	8.216501065	6.927113945	helz2	protein_coding	chr6:58575577-58621300:+	gi|528483601|ref|XP_003198895.2|	13899	0	PREDICTED: helicase with zinc finger domain 2 [Danio rerio]	gi|237823377|emb|CU929258.13|	3451	0	Zebrafish DNA sequence from clone CH211-158N11 in linkage group 6, complete sequence	Q9BYK8	71.2	1.00E-10	Helicase with zinc finger domain 2	YMR080c	203	5.00E-52	COG1112	pfam00773	RNB	RNB domain. This domain is the catalytic domain of ribonuclease II.	GO:0044255|cellular lipid metabolic process;GO:0045944|positive regulation of transcription from RNA polymerase II promoter;GO:0006351|transcription, DNA-templated;	GO:0016020|membrane;GO:0005654|nucleoplasm;	GO:0005524|ATP binding;GO:0003677|DNA binding;GO:0004386|helicase activity;GO:0030374|ligand-dependent nuclear receptor transcription coactivator activity;GO:0046872|metal ion binding;GO:0044822|poly(A) RNA binding;	.	.
ENSDARG00000062045	6	6.429705427	4.901203532	6.124077993	2.214065837	1.794238159	1.130838527	3.820080003	3.854793328	5.251674955	3.876272812	3.504050632	2.490339158	2.284939193	3.556317271	2.057375631	il1rapl1a	protein_coding	chr9:29905634-30174644:-	gi|528490166|ref|XP_005174755.1|	3520	0	PREDICTED: interleukin-1 receptor accessory protein-like 1-A isoform X1 [Danio rerio]	gi|117606156|ref|NM_001077576.1|	4044	0	Danio rerio interleukin 1 receptor accessory protein-like 1a (il1rapl1a), mRNA	B6ZK76	1045	0	Interleukin-1 receptor accessory protein-like 1-A	.	.	.	.	pfam01582	TIR	TIR domain. The Toll/interleukin-1 receptor (TIR) homology domain is an intracellular signalling domain found in MyD88, interleukin 1 receptor and the Toll receptor. It contains three highly-conserved regions, and mediates protein-protein interactions between the Toll-like receptors (TLRs) and signal-transduction components. TIR-like motifs are also found in plant proteins thought to be involved …	.	GO:0005737|cytoplasm;GO:0016021|integral component of membrane;GO:0005886|plasma membrane;	GO:0004908|interleukin-1 receptor activity;	.	.
ENSDARG00000018263	1	16.05444539	9.833545923	11.29192185	7.102859095	9.970233973	3.965421231	30.28468194	13.21100746	31.72636093	11.31493488	10.36484103	10.16147201	7.141394775	9.038695054	6.099892626	pdia2	protein_coding	chr1:9270378-9280654:+	gi|688531300|ref|XP_009304117.1|	2437	0	PREDICTED: protein disulfide-isomerase A2 isoform X1 [Danio rerio]	gi|41054919|ref|NM_201048.1|	1776	0	Danio rerio protein disulfide isomerase family A, member 2 (pdia2), mRNA	Q5RCH2	493	2.00E-166	Protein disulfide-isomerase A2	SPAC1F5.02	234	6.00E-68	COG0526	pfam13848	Thioredoxin_6	Thioredoxin-like domain.	GO:0045454|cell redox homeostasis;	GO:0005788|endoplasmic reticulum lumen;	GO:0003756|protein disulfide isomerase activity;GO:0005496|steroid binding;	K09581	PDIA2; protein disulfide isomerase family A, member 2 [EC:5.3.4.1]
ENSDARG00000103343	4	0.256839721	0.141585749	1.354498774	0.544109019	0.579749084	0.281874831	1.009909053	0.339695388	0.963542918	1.20239054	2.482171948	1.728745312	0.575876335	2.433403122	1.063637294	si:dkey-248e17.4	protein_coding	chr4:58392127-58396886:-	gi|167621538|ref|NP_001108057.1|	1802	0	uncharacterized protein LOC100136867 [Danio rerio]	gi|167621537|ref|NM_001114585.1|	1043	0	Danio rerio zgc:174944 (zgc:174944), mRNA	P59046	95.1	2.00E-19	NACHT, LRR and PYD domains-containing protein 12	.	.	.	.	pfam13765	PRY	SPRY-associated domain. SPRY and PRY domains occur on PYRIN proteins. Their function is not known.	GO:0006919|activation of cysteine-type endopeptidase activity involved in apoptotic process;GO:0071345|cellular response to cytokine stimulus;GO:0036336|dendritic cell migration;GO:0050710|negative regulation of cytokine secretion;GO:0070373|negative regulation of ERK1 and ERK2 cascade;GO:0043124|negative regulation of I-kappaB kinase/NF-kappaB signaling;GO:0050728|negative regulation of inflamma…	GO:0005737|cytoplasm;	GO:0005524|ATP binding;GO:0008656|cysteine-type endopeptidase activator activity involved in apoptotic process;	.	.
ENSDARG00000098855	6	5.728787342	5.710324365	4.460013898	5.438437987	6.381169468	6.94458061	3.025940473	4.467497465	5.322246906	4.454055958	4.421289694	4.424217322	2.679898686	3.200285508	3.287275349	OXSM	protein_coding	chr19:1098920-1106153:+	gi|326676352|ref|XP_693069.5|	2180	0	PREDICTED: 3-oxoacyl-[acyl-carrier-protein] synthase, mitochondrial [Danio rerio]	gi|145337921|gb|BC139555.1|	1906	0	Danio rerio similar to 3-oxoacyl-[acyl-carrier-protein] synthase, mitochondrial precursor (Beta-ketoacyl-ACP synthase), mRNA (cDNA clone IMAGE:8745647), partial cds	Q9NWU1	580	0	3-oxoacyl-[acyl-carrier-protein] synthase, mitochondrial	AGc2030	376	1.00E-119	COG0304	pfam00109	ketoacyl-synt	Beta-ketoacyl synthase, N-terminal domain. The structure of beta-ketoacyl synthase is similar to that of the thiolase family (pfam00108) and also chalcone synthase. The active site of beta-ketoacyl synthase is located between the N and C-terminal domains. The N-terminal domain contains most of the structures involved in dimer formation and also the active site cysteine.	GO:0006637|acyl-CoA metabolic process;GO:0051792|medium-chain fatty acid biosynthetic process;GO:0051790|short-chain fatty acid biosynthetic process;	GO:0005737|cytoplasm;GO:0005739|mitochondrion;	GO:0004315|3-oxoacyl-[acyl-carrier-protein] synthase activity;	K09458	fabF; 3-oxoacyl-[acyl-carrier-protein] synthase II [EC:2.3.1.179]
ENSDARG00000103347	2	0.465235612	0.03885853	1.610896136	0	0.807806755	0.038680593	0	0	0	0.783747179	0	0	0.474151701	0.154119925	0.109469126	cyp2aa3	protein_coding	chr23:42516641-42528380:+	gi|528518759|ref|XP_005162489.1|	2557	0	PREDICTED: cytochrome P450, family 2, subfamily AA, polypeptide 3 isoform X1 [Danio rerio]	gi|190338373|gb|BC163376.1|	1704	0	Danio rerio zgc:63546, mRNA (cDNA clone MGC:194781 IMAGE:9038498), complete cds	P51589	391	6.00E-128	Cytochrome P450 2J2	BH0579	91.3	1.00E-18	COG2124	pfam00067	p450	Cytochrome P450. Cytochrome P450s are haem-thiolate proteins involved in the oxidative degradation of various compounds. They are particularly well known for their role in the degradation of environmental toxins and mutagens. They can be divided into 4 classes, according to the method by which electrons from NAD(P)H are delivered to the catalytic site. Sequence conservation is relatively low with…	GO:0019373|epoxygenase P450 pathway;GO:0006690|icosanoid metabolic process;GO:0043651|linoleic acid metabolic process;GO:0008016|regulation of heart contraction;GO:0006805|xenobiotic metabolic process;	GO:0005789|endoplasmic reticulum membrane;GO:0070062|extracellular exosome;GO:0031090|organelle membrane;	GO:0008405|arachidonic acid 11,12-epoxygenase activity;GO:0008404|arachidonic acid 14,15-epoxygenase activity;GO:0008392|arachidonic acid epoxygenase activity;GO:0070330|aromatase activity;GO:0020037|heme binding;GO:0005506|iron ion binding;GO:0071614|linoleic acid epoxygenase activity;GO:0004497|monooxygenase activity;GO:0008395|steroid hydroxylase activity;	K07418	CYP2J; cytochrome P450, family 2, subfamily J [EC:1.14.14.1]
ENSDARG00000098857	6	5.853871929	4.524901939	5.511569508	3.743903183	3.484470295	6.780316714	2.50193179	3.179050336	3.238261073	4.991392539	3.981955173	3.841942838	2.252043181	1.836170995	2.26818325	lifra	protein_coding	chr5:7912546-7978899:-	gi|159885679|tpe|CAI96518.1|	4488	0	TPA: leukemia inhibitory factor receptor.a [Danio rerio]	gi|62122792|ref|NM_001014306.1|	3877	0	Danio rerio leukemia inhibitory factor receptor alpha a (lifra), mRNA	O70535	278	5.00E-76	Leukemia inhibitory factor receptor	.	.	.	.	pfam06328	Lep_receptor_Ig	Ig-like C2-type domain. This domain is a ligand-binding immunoglobulin-like domain. The two cysteine residues form a disulphide bridge.	GO:0031100|organ regeneration;GO:0010656|negative regulation of muscle cell apoptotic process;GO:0048812|neuron projection morphogenesis;GO:0014070|response to organic cyclic compound;	GO:0016021|integral component of membrane;GO:0005886|plasma membrane;	GO:0019955|cytokine binding;GO:0004923|leukemia inhibitory factor receptor activity;GO:0046982|protein heterodimerization activity;	K05058	LIFR; leukemia inhibitory factor receptor
ENSDARG00000081841	3	0	0.525515358	0.558601346	7.068379196	3.972590796	14.12394242	0.488924224	3.242126732	4.828038264	1.11571027	0	0	0	0	0	dre-mir-29a	miRNA	chr4:11607909-11608034:-	.	.	.	.	gi|262205818|ref|NR_030039.1|	126	1.00E-58	Danio rerio microRNA 29a-1 (mir29a-1), microRNA	.	.	.	.	.	.	.	.	pfam07416	Crinivirus_P26	Crinivirus P26 protein. This family consists of several Crinivirus P26 proteins which seem to be found exclusively in the Lettuce infectious yellows virus. The function of this family is unknown.	.	.	.	.	.
ENSDARG00000101019	6	4.722873011	3.379590262	2.882763091	1.402986419	1.813574059	3.197985701	1.552727214	3.003104156	2.768440341	3.454694559	4.311771867	4.461016105	1.174864764	1.8203049	1.919813933	ext1b	protein_coding	chr19:46829094-46865351:-	gi|117606177|ref|NP_001012369.2|	2283	0	exostosin-1b [Danio rerio]	gi|117606176|ref|NM_001012369.2|	1571	0	Danio rerio exostosin glycosyltransferase 1b (ext1b), mRNA	Q5IGR7	881	0	Exostosin-1b	.	.	.	.	pfam09258	Glyco_transf_64	Glycosyl transferase family 64 domain. Members of this family catalyse the transfer reaction of N-acetylglucosamine and N-acetylgalactosamine from the respective UDP-sugars to the non-reducing end of [glucuronic acid]beta 1-3[galactose]beta 1-O-naphthalenemethanol, an acceptor substrate analog of the natural common linker of various glycosylaminoglycans. They are also required for the biosynthesi…	GO:0006024|glycosaminoglycan biosynthetic process;GO:0015012|heparan sulfate proteoglycan biosynthetic process;GO:0006486|protein glycosylation;	GO:0030176|integral component of endoplasmic reticulum membrane;	GO:0050508|glucuronosyl-N-acetylglucosaminyl-proteoglycan 4-alpha-N-acetylglucosaminyltransferase activity;GO:0046872|metal ion binding;GO:0050509|N-acetylglucosaminyl-proteoglycan 4-beta-glucuronosyltransferase activity;	.	.
ENSDARG00000037910	6	1.79798484	1.032457409	2.975336068	1.520950617	4.032468724	7.650876638	2.412093937	3.515112455	3.770754764	3.214915663	4.022276789	6.178165525	1.744344431	1.797211351	1.680499014	filip1l	protein_coding	chr11:43976547-44029701:+	gi|160333855|ref|NP_001103956.1|	4262	0	filamin A-interacting protein 1-like [Danio rerio]	gi|160333854|ref|NM_001110486.1|	2772	0	Danio rerio filamin A interacting protein 1-like (filip1l), mRNA	A3KNA5	1626	0	Filamin A-interacting protein 1-like	.	.	.	.	pfam01576	Myosin_tail_1	Myosin tail. The myosin molecule is a multi-subunit complex made up of two heavy chains and four light chains it is a fundamental contractile protein found in all eukaryote cell types. This family consists of the coiled-coil myosin heavy chain tail region. The coiled-coil is composed of the tail from two molecules of myosin. These can then assemble into the macromolecular thick filament. The coil…	GO:0006974|cellular response to DNA damage stimulus;GO:0006631|fatty acid metabolic process;GO:0010883|regulation of lipid storage;GO:1902445|regulation of mitochondrial membrane permeability involved in programmed necrotic cell death;	GO:0005759|mitochondrial matrix;GO:0005739|mitochondrion;	GO:0051213|dioxygenase activity;GO:0046872|metal ion binding;	.	.
ENSDARG00000091951	2	0	1.473261845	7.105077691	5.976231607	2.217088683	0	0	0	0.083550724	0	0.050347151	0	5.454480307	0	0.051238948	si:dkeyp-85e10.2	protein_coding	chr19:7959197-7967536:+	gi|528509131|ref|XP_005159452.1|	2363	0	PREDICTED: uncharacterized protein LOC100034474 isoform X2 [Danio rerio]	gi|131889173|ref|NM_001083065.1|	2049	0	Danio rerio si:dkeyp-85e10.2 (si:dkeyp-85e10.2), mRNA	.	.	.	.	.	.	.	.	pfam13175	AAA_15	AAA ATPase domain. This family of domains contain a P-loop motif that is characteristic of the AAA superfamily.	.	.	.	.	.
ENSDARG00000091950	2	1.53916688	0	2.564232813	0.159837721	1.100447576	0.165607365	0	0	0.084915246	1.324555534	0.076754105	0.164703903	0.624626593	0.494887599	0.624909181	si:dkeyp-4c7.3	protein_coding	chr13:38100267-38152091:+	.	.	.	.	gi|631226415|ref|NR_120381.1|	627	0	Danio rerio uncharacterized LOC100330584 (LOC100330584), long non-coding RNA	.	.	.	.	.	.	.	.	pfam01199	Ribosomal_L34e	Ribosomal protein L34e.	.	.	.	.	.
ENSDARG00000037919	1	16.14779674	16.35071845	16.40057247	27.97254818	29.2451	31.97949646	15.12734379	11.78370328	18.74931437	17.62813002	17.87341543	21.23647685	13.06895798	14.18591403	14.75421168	rbbp6	protein_coding	chr3:35276597-35291688:+	gi|528474333|ref|XP_005164076.1|	3973	0	PREDICTED: E3 ubiquitin-protein ligase RBBP6 isoform X3 [Danio rerio]	gi|302632527|ref|NM_001193674.1|	6777	0	Danio rerio retinoblastoma binding protein 6 (rbbp6), transcript variant 1, mRNA	Q7Z6E9	253	5.00E-66	E3 ubiquitin-protein ligase RBBP6	SPBP8B7.15c	157	4.00E-39	COG5222	pfam08783	DWNN	DWNN domain. DWNN is a ubiquitin like domain found at the N terminus of the RBBP6 family of splicing-associated proteins. The DWNN domain is independently expressed in higher vertebrates so it may function as a novel ubiquitin-like modifier of other proteins.	GO:0006974|cellular response to DNA damage stimulus;GO:0006260|DNA replication;GO:0048568|embryonic organ development;GO:0001701|in utero embryonic development;GO:0006397|mRNA processing;GO:0035264|multicellular organism growth;GO:0000209|protein polyubiquitination;GO:0042787|protein ubiquitination involved in ubiquitin-dependent protein catabolic process;GO:0006275|regulation of DNA replication;…	GO:0005694|chromosome;GO:0005829|cytosol;GO:0005815|microtubule organizing center;GO:0005730|nucleolus;GO:0005654|nucleoplasm;	GO:0016874|ligase activity;GO:0044822|poly(A) RNA binding;GO:0061630|ubiquitin protein ligase activity;GO:0004842|ubiquitin-protein transferase activity;GO:0008270|zinc ion binding;	K10624	RBBP6; E3 ubiquitin-protein ligase RBBP6 [EC:2.3.2.27]
ENSDARG00000101014	5	172.8311925	403.4299169	235.9409557	81.85202017	57.8540636	179.1047713	39.38510232	59.03908442	101.162792	105.6383135	79.31891697	14.96330919	35.24531438	80.3491827	24.25597662	slco1f4	protein_coding	chr4:70644210-70663751:-	gi|347446684|ref|NP_001074135.2|	3435	0	solute carrier organic anion transporter family, member 1F4 [Danio rerio]	gi|347446683|ref|NM_001080666.2|	2243	0	Danio rerio solute carrier organic anion transporter family, member 1F4 (slco1f4), mRNA	Q9NYB5	619	0	Solute carrier organic anion transporter family member 1C1	.	.	.	.	pfam03137	OATP	Organic Anion Transporter Polypeptide (OATP) family. This family consists of several eukaryotic Organic-Anion-Transporting Polypeptides (OATPs). Several have been identified mostly in human and rat. Different OATPs vary in tissue distribution and substrate specificity. Since the numbering of different OATPs in particular species was based originally on the order of discovery, similarly numbered O…	GO:0008206|bile acid metabolic process;GO:0043252|sodium-independent organic anion transport;	GO:0005887|integral component of plasma membrane;GO:0005886|plasma membrane;	GO:0015125|bile acid transmembrane transporter activity;GO:0015347|sodium-independent organic anion transmembrane transporter activity;GO:0015349|thyroid hormone transmembrane transporter activity;	K08747	SLCO1C; solute carrier organic anion transporter family, member 1C
ENSDARG00000101017	6	5.146244253	3.546155376	5.62218311	3.560923256	4.960029023	6.122511801	8.835252755	9.311427213	12.67999157	7.209750145	3.382940073	8.687395811	10.73762408	7.290595258	5.945051276	CT583642.2	protein_coding	chr3:32843914-32852297:-	gi|528474513|ref|XP_688939.6|	5093	0	PREDICTED: deleted in malignant brain tumors 1 protein-like isoform X1 [Danio rerio]	gi|117676012|emb|CT583642.8|	464	0	Zebrafish DNA sequence from clone DKEY-18H4 in linkage group 3, complete sequence	Q9UGM3	450	5.00E-132	Deleted in malignant brain tumors 1 protein	.	.	.	.	pfam00530	SRCR	Scavenger receptor cysteine-rich domain. These domains are disulphide rich extracellular domains. These domains are found in several extracellular receptors and may be involved in protein-protein interactions.	GO:0044267|cellular protein metabolic process;GO:0051607|defense response to virus;GO:0030855|epithelial cell differentiation;GO:0043152|induction of bacterial agglutination;GO:0045087|innate immune response;GO:0007275|multicellular organismal development;GO:0015031|protein transport;	GO:0005737|cytoplasm;GO:0070062|extracellular exosome;GO:0005576|extracellular region;GO:0005615|extracellular space;GO:0019898|extrinsic component of membrane;GO:0030670|phagocytic vesicle membrane;GO:0042589|zymogen granule membrane;	GO:0048306|calcium-dependent protein binding;GO:0005044|scavenger receptor activity;GO:0008329|signaling pattern recognition receptor activity;GO:0035375|zymogen binding;	K13912	DMBT1; deleted in malignant brain tumors 1 protein
ENSDARG00000076118	6	8.196249612	10.41657797	7.087744335	6.183061161	5.360310702	10.17074811	4.876504735	4.877808906	9.04168689	8.874256634	6.305526599	5.090472828	2.304171146	3.157759748	3.675881109	cdip1	protein_coding	chr3:48435526-48458053:-	gi|149773493|ref|NP_001092712.1|	667	1.00E-79	cell death-inducing p53-target protein 1 [Danio rerio]	gi|149773492|ref|NM_001099242.1|	1808	0	Danio rerio cell death-inducing p53 target 1 (cdip1), mRNA	Q8AVW3	138	5.00E-36	Cell death-inducing p53-target protein 1	.	.	.	.	pfam10601	zf-LITAF-like	LITAF-like zinc ribbon domain. Members of this family display a conserved zinc ribbon structure with the motif C-XX-C- separated from the more C-terminal HX-C(P)X-C-X4-G-R motif by a variable region of usually 25-30 (hydrophobic) residues. Although it belongs to one of the zinc finger's fold groups (zinc ribbon), this particular domain was first identified in LPS-induced tumor necrosis alpha fact…	GO:0006915|apoptotic process;	.	.	.	.
ENSDARG00000002406	6	2.396043356	2.244574072	1.97294791	2.363806081	1.957808763	1.374951369	5.74278792	4.305223046	4.185978417	3.344948846	3.982807525	3.333160339	6.03676764	3.167194601	4.053354857	zmynd10	protein_coding	chr1:22000517-22012644:+	gi|565830642|sp|F1QN74.1|ZMY10_DANRE	2407	0	RecName: Full=Zinc finger MYND domain-containing protein 10	gi|41055326|ref|NM_200397.1|	1440	0	Danio rerio zinc finger, MYND-type containing 10 (zmynd10), mRNA	F1QN74	931	0	Zinc finger MYND domain-containing protein 10	.	.	.	.	pfam01753	zf-MYND	MYND finger.	GO:0036159|inner dynein arm assembly;GO:0044458|motile cilium assembly;GO:0036158|outer dynein arm assembly;	GO:0034451|centriolar satellite;	GO:0046872|metal ion binding;	.	.
ENSDARG00000079608	3	0.663359079	0.478871983	1.4345147	0.460072019	0.370226657	0.260006829	0.121507795	0	0.177758148	0.462128514	0.241010917	0.129294188	0.204307515	0.086331477	0.204399946	SGPP2	protein_coding	chr15:42279355-42299710:+	gi|292621757|ref|XP_002664750.1|	2097	0	PREDICTED: sphingosine-1-phosphate phosphatase 2 [Danio rerio]	gi|597752234|ref|XM_007237918.1|	167	3.00E-80	PREDICTED: Astyanax mexicanus sphingosine-1-phosphate phosphatase 2 (sgpp2), mRNA	Q8IWX5	349	6.00E-114	Sphingosine-1-phosphate phosphatase 2	SPAC823.11	86.3	3.00E-17	COG0671	pfam01569	PAP2	PAP2 superfamily. This family includes the enzyme type 2 phosphatidic acid phosphatase (PAP2), Glucose-6-phosphatase EC:3.1.3.9, Phosphatidylglycerophosphatase B EC:3.1.3.27 and bacterial acid phosphatase EC:3.1.3.2. The family also includes a variety of haloperoxidases that function by oxidizing halides in the presence of hydrogen peroxide to form the corresponding hypohalous acids.	GO:0030148|sphingolipid biosynthetic process;GO:0006670|sphingosine metabolic process;	GO:0005783|endoplasmic reticulum;GO:0005789|endoplasmic reticulum membrane;GO:0016021|integral component of membrane;	GO:0070780|dihydrosphingosine-1-phosphate phosphatase activity;GO:0042392|sphingosine-1-phosphate phosphatase activity;	K04717	SGPP2; sphingosine-1-phosphate phosphotase 2 [EC:3.1.3.-]
ENSDARG00000076110	3	0.20885847	0.287838878	0.382451202	0.034567332	0.056663924	0.047753473	0.24548052	0	0.195884907	0.127313434	0.022132319	0.011873239	0	0.059459417	0.033786522	nwd1	protein_coding	chr11:7204456-7237148:+	gi|528493576|ref|XP_002663751.3|	8373	0	PREDICTED: NACHT and WD repeat domain-containing protein 1 isoform X2 [Danio rerio]	gi|597438728|emb|FP016232.7|	1268	0	Zebrafish DNA sequence from clone CH73-238C9 in linkage group 11, complete sequence	A6H603	129	1.00E-31	NACHT domain- and WD repeat-containing protein 1	.	.	.	.	pfam13271	DUF4062	Domain of unknown function (DUF4062). This presumed domain is functionally uncharacterized. This domain family is found in bacteria, archaea and eukaryotes, and is approximately 80 amino acids in length. There is a conserved SST sequence motif.	.	GO:0005829|cytosol;	GO:0005524|ATP binding;	.	.
ENSDARG00000008859	1	30.35223158	25.33994633	41.79713088	29.06735014	56.52805713	71.03256578	11.89439808	16.81167408	11.93268226	19.3026459	12.14875779	8.899965432	14.53361938	13.98958415	17.98392483	mylipa	protein_coding	chr19:26756513-26794432:+	gi|224471841|sp|Q6TEM9.2|MYLIA_DANRE	2407	0	RecName: Full=E3 ubiquitin-protein ligase MYLIP-A; AltName: Full=Myosin regulatory light chain-interacting protein A; Short=MIR-A	gi|28374208|gb|BC045844.1|	2579	0	Danio rerio myosin regulatory light chain interacting protein, mRNA (cDNA clone IMAGE:3819658)	Q6TEM9	931	0	E3 ubiquitin-protein ligase MYLIP-A	.	.	.	.	pfam09379	FERM_N	FERM N-terminal domain. This domain is the N-terminal ubiquitin-like structural domain of the FERM domain.	GO:0007369|gastrulation;GO:0030178|negative regulation of Wnt signaling pathway;GO:0042787|protein ubiquitination involved in ubiquitin-dependent protein catabolic process;	GO:0005737|cytoplasm;GO:0005829|cytosol;	GO:0016874|ligase activity;GO:0004842|ubiquitin-protein transferase activity;GO:0008270|zinc ion binding;	K10637	MYLIP, MIR; E3 ubiquitin-protein ligase MYLIP [EC:2.3.2.27]
ENSDARG00000073761	6	2.34148961	2.374797252	1.781867585	3.704188592	3.986419435	5.339684559	3.015239012	3.217502985	3.450926928	2.580256535	2.526343548	2.62761796	1.914335553	1.302020734	1.574138317	myo19	protein_coding	chr5:3619704-3650110:-	gi|688553140|ref|XP_009299420.1|	3574	0	PREDICTED: unconventional myosin-XIX-like [Danio rerio]	gi|597784795|ref|XM_007255832.1|	439	0	PREDICTED: Astyanax mexicanus myosin XIX (myo19), mRNA	Q569U0	259	1.00E-75	Unconventional myosin-XIX	YAL029c	90.1	2.00E-18	COG5022	pfam00063	Myosin_head	Myosin head (motor domain).	.	GO:0005741|mitochondrial outer membrane;GO:0016459|myosin complex;	GO:0005524|ATP binding;GO:0003774|motor activity;	.	.
ENSDARG00000073763	1	19.95465119	2.847954199	13.24425772	3.76220183	5.382219788	7.618829153	54.15230075	21.96279399	8.903317875	8.691742907	8.211863902	14.80209914	12.86445335	56.30100296	22.56476498	CU896602.1	protein_coding	chr24:38335721-38336193:+	gi|528520446|ref|XP_005162949.1|	651	2.00E-85	PREDICTED: Ig kappa chain V-III region NG9 [Danio rerio]	gi|148614134|gb|EF222441.1|	330	1.00E-171	Danio rerio clone 24.3 immunoglobulin light chain mRNA, partial cds	P06312	99	1.00E-25	Immunoglobulin kappa variable 4-1	.	.	.	.	pfam07686	V-set	Immunoglobulin V-set domain. This domain is found in antibodies as well as neural protein P0 and CTL4 amongst others.	GO:0006956|complement activation;GO:0006958|complement activation, classical pathway;GO:0038095|Fc-epsilon receptor signaling pathway;GO:0038096|Fc-gamma receptor signaling pathway involved in phagocytosis;GO:0006955|immune response;GO:0002377|immunoglobulin production;GO:0006898|receptor-mediated endocytosis;GO:0050776|regulation of immune response;	GO:0072562|blood microparticle;GO:0005576|extracellular region;GO:0005886|plasma membrane;	GO:0003823|antigen binding;GO:0004252|serine-type endopeptidase activity;	.	.
ENSDARG00000073768	6	6.032700504	3.66211151	3.787467423	3.708521821	4.956831341	4.433524525	3.222953405	3.053123828	2.930020232	3.992541682	4.383588695	2.253661475	2.043808091	0.981391451	2.602387112	TMEM125	protein_coding	chr6:34098323-34098991:-	gi|688560918|ref|XP_009300775.1|	892	8.00E-119	PREDICTED: transmembrane protein 125 isoform X2 [Danio rerio]	gi|111153873|emb|CR936976.15|	660	0	Zebrafish DNA sequence from clone CH211-286N19 in linkage group 7, complete sequence	Q8CHQ6	74.7	5.00E-15	Transmembrane protein 125	.	.	.	.	pfam15109	TMEM125	TMEM125 protein family. The function of this family of transmembrane proteins, TMEM125, has not, as yet, been determined. Members of this family are as yet uncharacterized. This family of proteins is found in eukaryotes. Proteins in this family are typically between 55 and 232 amino acids in length.	.	GO:0016021|integral component of membrane;	.	.	.
ENSDARG00000101271	6	8.75718013	4.385335058	9.631057692	8.078147653	9.07531518	6.962760884	3.54048576	3.018531785	3.625653256	6.424952243	3.210312903	2.045141073	4.252213057	5.7138254	5.717559863	si:ch211-227n13.3	protein_coding	chr11:33598375-33606106:-	gi|528494629|ref|XP_005169450.1|	2109	0	PREDICTED: uncharacterized protein LOC558023 isoform X1 [Danio rerio]	gi|51870630|emb|BX323597.9|	821	0	Zebrafish DNA sequence from clone CH211-227N13 in linkage group 11, complete sequence	.	.	.	.	.	.	.	.	pfam09852	DUF2079	Predicted membrane protein (DUF2079). This domain, found in various hypothetical prokaryotic proteins, has no known function.	.	.	.	.	.
ENSDARG00000039661	6	3.915615224	4.880584125	4.759996577	6.695087134	8.771924224	10.2423625	6.506853237	7.527597439	5.803918339	4.486579595	5.24610807	5.877776666	5.549138039	4.839318803	4.417694786	slc36a4	protein_coding	chr15:41215158-41277631:-	gi|528502493|ref|XP_002664741.3|	2047	0	PREDICTED: proton-coupled amino acid transporter 4 [Danio rerio]	gi|219926783|emb|CU915757.14|	1086	0	Zebrafish DNA sequence from clone CH73-45M24 in linkage group 15, complete sequence	Q8CH36	461	3.00E-151	Proton-coupled amino acid transporter 4	YNL101w	95.5	2.00E-19	COG0814	pfam01490	Aa_trans	Transmembrane amino acid transporter protein. This transmembrane region is found in many amino acid transporters including UNC-47 and MTR. UNC-47 encodes a vesicular amino butyric acid (GABA) transporter, (VGAT). UNC-47 is predicted to have 10 transmembrane domains. MTR is a N system amino acid transporter system protein involved in methyltryptophan resistance. Other members of this family includ…	GO:0003333|amino acid transmembrane transport;GO:0015808|L-alanine transport;GO:0015824|proline transport;GO:0015827|tryptophan transport;	GO:0016021|integral component of membrane;	GO:0015171|amino acid transmembrane transporter activity;GO:0015180|L-alanine transmembrane transporter activity;GO:0015193|L-proline transmembrane transporter activity;GO:0015196|L-tryptophan transmembrane transporter activity;GO:0015293|symporter activity;	K14209	SLC36A, PAT; solute carrier family 36 (proton-coupled amino acid transporter)
ENSDARG00000035565	1	13.49510133	9.229585869	12.39069864	16.66506961	17.61787903	17.37435083	9.032826523	9.076895083	9.926618015	10.14220491	8.558898076	7.040390037	8.314767285	7.036116141	7.534583834	atp6v0a2b	protein_coding	chr5:24040062-24064069:+	gi|170172599|ref|NP_001116219.1|	4133	0	V-type proton ATPase 116 kDa subunit a isoform 2 [Danio rerio]	gi|191961832|ref|NM_001122747.2|	3526	0	Danio rerio ATPase, H+ transporting, lysosomal V0 subunit a2b (atp6v0a2b), mRNA	P15920	89.7	2.00E-19	V-type proton ATPase 116 kDa subunit a isoform 2	YOR270c	541	1.00E-172	COG1269	pfam01496	V_ATPase_I	V-type ATPase 116kDa subunit family. This family consists of the 116kDa V-type ATPase (vacuolar (H+)-ATPases) subunits, as well as V-type ATP synthase subunit i. The V-type ATPases family are proton pumps that acidify intracellular compartments in eukaryotic cells for example yeast central vacuoles, clathrin-coated and synaptic vesicles. They have important roles in membrane trafficking processes…	GO:0015991|ATP hydrolysis coupled proton transport;GO:0015986|ATP synthesis coupled proton transport;GO:0007035|vacuolar acidification;GO:0070072|vacuolar proton-transporting V-type ATPase complex assembly;	GO:0001669|acrosomal vesicle;GO:0005737|cytoplasm;GO:0010008|endosome membrane;GO:0005925|focal adhesion;GO:0016021|integral component of membrane;GO:0005765|lysosomal membrane;GO:0005886|plasma membrane;GO:0016471|vacuolar proton-transporting V-type ATPase complex;GO:0000220|vacuolar proton-transporting V-type ATPase, V0 domain;	GO:0051117|ATPase binding;GO:0046961|proton-transporting ATPase activity, rotational mechanism;	K02154	ATPeV0A, ATP6N; V-type H+-transporting ATPase subunit a
ENSDARG00000062060	6	5.661218962	5.814992097	5.09397097	10.72422228	9.09808319	11.73670943	7.136438089	7.661777868	7.41250888	6.591602487	8.250422698	8.27357275	5.855736487	6.75094242	6.750177415	gmeb1	protein_coding	chr19:16160077-16184825:+	gi|319803050|ref|NP_001188372.1|	2216	0	glucocorticoid modulatory element-binding protein 1 [Danio rerio]	gi|56797714|emb|CR385068.11|	3335	0	Zebrafish DNA sequence from clone CH211-245H7 in linkage group 19, complete sequence	Q9JL60	79.3	1.00E-13	Glucocorticoid modulatory element-binding protein 1	.	.	.	.	pfam01342	SAND	SAND domain. The DNA binding activity of two proteins has been mapped to the SAND domain. The conserved KDWK motif is necessary for DNA binding, and it appears to be important for dimerization. This region is also found in the putative transcription factor RegA from the multicellular green alga Volvox cateri. This region of RegA is known as the VARL domain.	GO:0006357|regulation of transcription from RNA polymerase II promoter;	GO:0005737|cytoplasm;GO:0005654|nucleoplasm;GO:0005634|nucleus;	GO:0046872|metal ion binding;GO:0000978|RNA polymerase II core promoter proximal region sequence-specific DNA binding;GO:0003713|transcription coactivator activity;GO:0001077|transcriptional activator activity, RNA polymerase II core promoter proximal region sequence-specific binding;	.	.
ENSDARG00000037932	4	3.446986249	1.083441355	1.904658334	6.605754	4.882611595	3.318400568	0.426462539	0.514169878	1.999275757	2.123290029	4.806188439	2.475222907	0.586693009	1.115599357	3.873925668	lin7b	protein_coding	chr3:31802179-31812995:+	gi|226443252|ref|NP_001140095.1|	1043	5.00E-137	protein lin-7 homolog B [Salmo salar]	gi|89191825|ref|NM_001020733.2|	1497	0	Danio rerio lin-7 homolog B (C. elegans) (lin7b), mRNA	Q9Z252	242	2.00E-75	Protein lin-7 homolog B	.	.	.	.	pfam00595	PDZ	PDZ domain (Also known as DHR or GLGF). PDZ domains are found in diverse signaling proteins.	GO:0007043|cell-cell junction assembly;GO:0006887|exocytosis;GO:0045199|maintenance of epithelial cell apical/basal polarity;GO:0007269|neurotransmitter secretion;GO:1903361|protein localization to basolateral plasma membrane;GO:0015031|protein transport;	GO:0016323|basolateral plasma membrane;GO:0005923|bicellular tight junction;GO:0005911|cell-cell junction;GO:0043005|neuron projection;GO:0014069|postsynaptic density;GO:0045211|postsynaptic membrane;GO:0098793|presynapse;GO:0045202|synapse;	GO:0030165|PDZ domain binding;	.	.
ENSDARG00000091972	6	8.46224967	12.15141889	8.209615429	3.017527355	3.697660329	4.459036253	9.964017157	5.294297152	10.56461872	6.066999935	13.77754087	11.87686759	7.684218523	8.781240397	8.799751445	si:dkey-58f10.7	protein_coding	chr5:38126701-38136195:+	gi|190194313|ref|NP_001121722.1|	1310	2.00E-178	uncharacterized protein LOC564114 [Danio rerio]	gi|190194312|ref|NM_001128250.1|	1286	0	Danio rerio si:dkey-58f10.7 (si:dkey-58f10.7), mRNA	.	.	.	.	.	.	.	.	pfam14296	O-ag_pol_Wzy	O-antigen polysaccharide polymerase Wzy. This family includes O-antigen polysaccharide polymerases. These enzymes link O-units via a glycosidic linkage to form a long O-antigen. These enzymes vary in specificity and sequence.	.	.	.	.	.
ENSDARG00000032010	1	29.94254897	39.77754434	28.33855842	6.534631211	12.73937363	19.74732395	16.12149529	12.11411584	8.78227688	16.35294939	20.45258723	11.68355408	11.8942576	13.9700218	10.56900817	slc15a2	protein_coding	chr9:37510427-37529861:+	gi|89886325|ref|NP_001034917.1|	3614	0	solute carrier family 15 member 2 [Danio rerio]	gi|89886324|ref|NM_001039828.1|	3065	0	Danio rerio solute carrier family 15 (oligopeptide transporter), member 2 (slc15a2), mRNA	P46029	732	0	Solute carrier family 15 member 2	ECU11g1050	185	4.00E-49	COG3104	pfam00854	PTR2	POT family. The POT (proton-dependent oligopeptide transport) family all appear to be proton dependent transporters.	GO:0015031|protein transport;	GO:0016021|integral component of membrane;	GO:0015198|oligopeptide transporter activity;GO:0015293|symporter activity;	K14637	SLC15A2, PEPT2; solute carrier family 15 (oligopeptide transporter), member 2
ENSDARG00000036041	1	22.23654906	40.06422658	17.90776923	25.90918868	12.11765908	16.62393982	19.2221487	7.627205736	20.70556157	9.898397915	8.79708914	2.924953677	10.71896791	8.165332157	6.749118033	f2	protein_coding	chr7:38479613-38488900:+	gi|528485381|ref|XP_005169022.1|	3318	0	PREDICTED: prothrombin isoform X1 [Danio rerio]	gi|47087348|ref|NM_213390.1|	1634	0	Danio rerio coagulation factor II (thrombin) (f2), mRNA	P00734	52.8	5.00E-06	Prothrombin	VC1649	104	1.00E-22	COG5640	pfam00089	Trypsin	Trypsin.	GO:0006953|acute-phase response;GO:0007596|blood coagulation;GO:0007597|blood coagulation, intrinsic pathway;GO:0007166|cell surface receptor signaling pathway;GO:0044267|cellular protein metabolic process;GO:0006888|ER to Golgi vesicle-mediated transport;GO:0042730|fibrinolysis;GO:0050900|leukocyte migration;GO:0007275|multicellular organismal development;GO:0048712|negative regulation of astroc…	GO:0072562|blood microparticle;GO:0005788|endoplasmic reticulum lumen;GO:0070062|extracellular exosome;GO:0005576|extracellular region;GO:0005615|extracellular space;GO:0005796|Golgi lumen;GO:0005886|plasma membrane;	GO:0005509|calcium ion binding;GO:0008083|growth factor activity;GO:0005102|receptor binding;GO:0004252|serine-type endopeptidase activity;GO:0070053|thrombospondin receptor activity;	K01313	F2; coagulation factor II (thrombin) [EC:3.4.21.5]
ENSDARG00000036044	5	1389.15844	1737.414063	1925.393101	2033.382132	2230.446423	1452.452587	2881.745552	2756.452428	2022.99419	2146.054837	2176.335492	2088.143163	2964.084285	3262.166576	3120.455319	rps20	processed_transcript	chr7:58443547-58447960:+	gi|537237434|gb|ERE85990.1|	616	7.00E-79	40S ribosomal protein S20-like protein [Cricetulus griseus]	gi|156914938|gb|BC152693.1|	505	0	Danio rerio ribosomal protein S20, mRNA (cDNA clone MGC:174477 IMAGE:7909102), complete cds	P60868	234	6.00E-78	40S ribosomal protein S20	SPCC576.09	171	7.00E-54	COG0051	pfam00338	Ribosomal_S10	Ribosomal protein S10p/S20e. This family includes small ribosomal subunit S10 from prokaryotes and S20 from eukaryotes.	GO:0006412|translation;	GO:0022627|cytosolic small ribosomal subunit;	GO:0003723|RNA binding;GO:0003735|structural constituent of ribosome;	K02969	RP-S20e, RPS20; small subunit ribosomal protein S20e
ENSDARG00000098838	6	3.481807759	2.736472872	2.007453266	1.592236757	1.602447859	0.767307698	3.227241386	3.011894217	3.737654768	2.700304599	3.485118864	4.197169305	2.930254965	3.363008004	3.184927118	sdr42e1	protein_coding	chr18:611898-616864:-	gi|851328820|ref|NP_001297010.1|	1903	0	short-chain dehydrogenase/reductase family 42E member 1 isoform 1 [Danio rerio]	gi|211919497|emb|CU928152.5|	1600	0	Zebrafish DNA sequence from clone CH1073-484L23 in linkage group 18, complete sequence	A8DZE7	736	0	Short-chain dehydrogenase/reductase family 42E member 1	Rv1106c	162	1.00E-43	COG0451	pfam01073	3Beta_HSD	3-beta hydroxysteroid dehydrogenase/isomerase family. The enzyme 3 beta-hydroxysteroid dehydrogenase/5-ene-4-ene isomerase (3 beta-HSD) catalyses the oxidation and isomerization of 5-ene-3 beta-hydroxypregnene and 5-ene-hydroxyandrostene steroid precursors into the corresponding 4-ene-ketosteroids necessary for the formation of all classes of steroid hormones.	GO:0006694|steroid biosynthetic process;	GO:0016021|integral component of membrane;	GO:0003854|3-beta-hydroxy-delta5-steroid dehydrogenase activity;	.	.
ENSDARG00000098837	3	0.124096816	0.570081232	0.302986524	0.109540099	0.134671341	1.22006218	0.053038702	0.029308937	0.203679617	2.299621511	1.130925312	0.649031221	0.133771731	0.226104479	0.321197401	tgm5l	protein_coding	chr6:2012019-2028822:-	gi|161611683|gb|AAI55564.1|	3573	0	LOC565984 protein [Danio rerio]	gi|161611682|gb|BC155563.1|	2186	0	Danio rerio similar to Protein-glutamine gamma-glutamyltransferase 5 (Transglutaminase-5) (TGase 5) (Transglutaminase X) (TGase X) (TGX) (TG(X)), mRNA (cDNA clone IMAGE:5914761), partial cds	O43548	139	2.00E-34	Protein-glutamine gamma-glutamyltransferase 5	.	.	.	.	pfam00868	Transglut_N	Transglutaminase family.	GO:0006464|cellular protein modification process;GO:0008544|epidermis development;GO:0018149|peptide cross-linking;	GO:0005737|cytoplasm;	GO:0046872|metal ion binding;GO:0003810|protein-glutamine gamma-glutamyltransferase activity;	K05622	TGM5; transglutaminase 5 [EC:2.3.2.13]
ENSDARG00000014488	5	151.5962919	102.5883231	82.77240218	171.7123956	225.4637375	201.4961147	118.3830238	129.1896573	101.9117632	145.3379875	115.6338446	122.86274	98.8154438	87.18030555	110.5261276	ca2	protein_coding	chr24:32735385-32750019:-	gi|40363537|ref|NP_954685.1|	1362	0	carbonic anhydrase II [Danio rerio]	gi|40363536|ref|NM_199215.1|	1001	0	Danio rerio carbonic anhydrase II (ca2), mRNA	Q8UWA5	419	1.00E-145	Carbonic anhydrase 2	PM1905	153	9.00E-43	COG3338	pfam00194	Carb_anhydrase	Eukaryotic-type carbonic anhydrase.	GO:0006730|one-carbon metabolic process;	GO:0005737|cytoplasm;GO:0005886|plasma membrane;	GO:0004089|carbonate dehydratase activity;GO:0008270|zinc ion binding;	.	.
ENSDARG00000058094	1	7.122006337	2.617390062	8.132522221	155.0610574	239.0960619	324.4731066	6.766889659	7.530458555	8.863331363	7.159883008	2.809824538	3.38848075	2.385855169	2.744986579	4.112144679	ciarta	protein_coding	chr19:9009509-9021143:-	gi|189532244|ref|XP_001923101.1|	1507	0	PREDICTED: circadian-associated transcriptional repressor [Danio rerio]	gi|55249654|gb|BC085676.1|	1864	0	Danio rerio cDNA clone IMAGE:7012610	Q3TQ03	144	8.00E-36	Circadian-associated transcriptional repressor	.	.	.	.	pfam02005	TRM	N2,N2-dimethylguanosine tRNA methyltransferase. This enzyme EC:2.1.1.32 used S-AdoMet to methylate tRNA. The TRM1 gene of Saccharomyces cerevisiae is necessary for the N2,N2-dimethylguanosine modification of both mitochondrial and cytoplasmic tRNAs. The enzyme is found in both eukaryotes and archaebacteria	GO:0032922|circadian regulation of gene expression;GO:0045475|locomotor rhythm;GO:0045892|negative regulation of transcription, DNA-templated;GO:0006351|transcription, DNA-templated;	GO:0005634|nucleus;GO:0016605|PML body;	GO:0001046|core promoter sequence-specific DNA binding;GO:0070888|E-box binding;	.	.
ENSDARG00000059475	6	10.75859558	9.311635137	8.908098797	5.515105326	5.192270098	13.38402332	4.464918574	5.607962372	9.56803627	6.506499528	6.004825543	6.088215755	3.428785896	2.293007249	4.112561023	CAMSAP3	protein_coding	chr3:53097754-53196642:+	gi|528475198|ref|XP_684101.6|	6287	0	PREDICTED: calmodulin-regulated spectrin-associated protein 3 isoform X1 [Danio rerio]	gi|157310874|emb|CU463108.8|	2173	0	Zebrafish DNA sequence from clone CH73-51I17 in linkage group 3, complete sequence	Q80VC9	499	7.00E-148	Calmodulin-regulated spectrin-associated protein 3	.	.	.	.	pfam08683	CAMSAP_CKK	Microtubule-binding calmodulin-regulated spectrin-associated. This is the C-terminal domain of a family of eumetazoan proteins collectively defined as calmodulin-regulated spectrin-associated, or CAMSAP, proteins. CAMSAP proteins carry an N-terminal region that includes the CH domain, a central region including a predicted coiled-coil and this C-terminal, or CKK, domain - defined as being present…	GO:0090136|epithelial cell-cell adhesion;GO:0034453|microtubule anchoring;GO:0000226|microtubule cytoskeleton organization;GO:0010923|negative regulation of phosphatase activity;GO:0031175|neuron projection development;GO:0070507|regulation of microtubule cytoskeleton organization;GO:0033043|regulation of organelle organization;GO:0045218|zonula adherens maintenance;	GO:0005737|cytoplasm;GO:0036449|microtubule minus-end;GO:0005915|zonula adherens;	GO:0051011|microtubule minus-end binding;	K17493	CAMSAP; calmodulin-regulated spectrin-associated protein
ENSDARG00000101036	1	11.54355563	11.00715805	8.50089685	19.74556318	14.89721548	26.30762608	9.734036824	9.52006304	14.92302736	13.90580709	15.94850617	17.05491089	9.551243655	13.18786185	9.770901408	traf2b	protein_coding	chr5:53778020-53807255:+	gi|125817024|ref|XP_683631.2|	2700	0	PREDICTED: TNF receptor-associated factor 2 [Danio rerio]	gi|93117586|gb|DQ455748.1|	1150	0	Ctenopharyngodon idella TNF receptor associated factor 2 (TRAF2) mRNA, complete cds	Q12933	618	0	TNF receptor-associated factor 2	.	.	.	.	pfam00917	MATH	MATH domain. This motif has been called the Meprin And TRAF-Homology (MATH) domain. This domain is hugely expanded in the nematode C. elegans.	GO:0006919|activation of cysteine-type endopeptidase activity involved in apoptotic process;GO:0097296|activation of cysteine-type endopeptidase activity involved in apoptotic signaling pathway;GO:0007250|activation of NF-kappaB-inducing kinase activity;GO:0043623|cellular protein complex assembly;GO:0071732|cellular response to nitric oxide;GO:0071550|death-inducing signaling complex assembly;GO…	GO:1990597|AIP1-IRE1 complex;GO:0035631|CD40 receptor complex;GO:0005938|cell cortex;GO:0005737|cytoplasm;GO:0009898|cytoplasmic side of plasma membrane;GO:0005829|cytosol;GO:1990604|IRE1-TRAF2-ASK1 complex;GO:0045121|membrane raft;GO:0097057|TRAF2-GSTP1 complex;GO:0000151|ubiquitin ligase complex;GO:0012506|vesicle membrane;	GO:0005174|CD40 receptor binding;GO:0019899|enzyme binding;GO:0042802|identical protein binding;GO:0016874|ligase activity;GO:0019901|protein kinase binding;GO:0019903|protein phosphatase binding;GO:0004871|signal transducer activity;GO:0046625|sphingolipid binding;GO:0031996|thioesterase binding;GO:0005164|tumor necrosis factor receptor binding;GO:0031625|ubiquitin protein ligase binding;GO:0004…	K03173	TRAF2; TNF receptor-associated factor 2 [EC:2.3.2.27]
ENSDARG00000101789	5	18.78347445	30.67020087	17.66835369	40.81043627	26.32045754	34.35728105	42.11186835	62.7300378	47.96690234	53.80202856	59.81120648	63.63384614	81.47464202	53.13649104	66.41467341	cyp1c2	protein_coding	chr17:794442-796628:+	gi|40549337|gb|AAR87724.1|	2484	0	cytochrome P4501C2 [Cyprinus carpio]	gi|168693596|ref|NM_001114849.1|	2076	0	Danio rerio cytochrome P450, family 1, subfamily C, polypeptide 2 (cyp1c2), mRNA	Q16678	514	5.00E-173	Cytochrome P450 1B1	BH0579	108	2.00E-24	COG2124	pfam00067	p450	Cytochrome P450. Cytochrome P450s are haem-thiolate proteins involved in the oxidative degradation of various compounds. They are particularly well known for their role in the degradation of environmental toxins and mutagens. They can be divided into 4 classes, according to the method by which electrons from NAD(P)H are delivered to the catalytic site. Sequence conservation is relatively low with…	GO:0001525|angiogenesis;GO:0019369|arachidonic acid metabolic process;GO:0048514|blood vessel morphogenesis;GO:0007155|cell adhesion;GO:0006725|cellular aromatic compound metabolic process;GO:0070301|cellular response to hydrogen peroxide;GO:0071407|cellular response to organic cyclic compound;GO:0030199|collagen fibril organization;GO:0043542|endothelial cell migration;GO:0071603|endothelial cel…	GO:0005789|endoplasmic reticulum membrane;GO:0043231|intracellular membrane-bounded organelle;GO:0005739|mitochondrion;GO:0031090|organelle membrane;	GO:0070330|aromatase activity;GO:0020037|heme binding;GO:0005506|iron ion binding;GO:0004497|monooxygenase activity;GO:0016712|oxidoreductase activity, acting on paired donors, with incorporation or reduction of molecular oxygen, reduced flavin or flavoprotein as one donor, and incorporation of one atom of oxygen;GO:0019825|oxygen binding;	K07410	CYP1B1; cytochrome P450, family 1, subfamily B, polypeptide 1 [EC:1.14.14.1]
ENSDARG00000095047	4	12.16984453	0.272713901	15.18990745	0.890825385	4.896201794	0.651516289	0.710430256	1.009492508	0.501097876	11.98515455	0.402611318	1.13393346	3.276459758	1.730611877	3.124288529	si:dkey-85k15.4	protein_coding	chr16:14065466-14075398:-	gi|125839225|ref|XP_001337104.1|	1681	0	PREDICTED: uncharacterized protein si:dkey-85k15.4 [Danio rerio]	gi|51035942|emb|BX005429.13|	568	0	Zebrafish DNA sequence from clone DKEY-85K15 in linkage group 16, complete sequence	.	.	.	.	.	.	.	.	pfam12128	DUF3584	Protein of unknown function (DUF3584). This protein is found in bacteria and eukaryotes. Proteins in this family are typically between 943 to 1234 amino acids in length. This family contains a P-loop motif suggesting it is a nucleotide binding protein. It may be involved in replication.	.	.	.	.	.
ENSDARG00000101032	4	1.941435274	0.988282614	1.511700913	0.810534928	0.45553917	0.215946699	1.166156358	1.363180333	1.304115177	0.972337235	1.467911777	1.121569423	1.76473498	1.649144914	1.652358149	iqcb1	protein_coding	chr6:8990055-9000776:-	gi|56693316|ref|NP_001008622.1|	2914	0	IQ motif containing B1 [Danio rerio]	gi|56693315|ref|NM_001008622.1|	2577	0	Danio rerio IQ motif containing B1 (iqcb1), mRNA	Q8BP00	127	1.00E-57	IQ calmodulin-binding motif-containing protein 1	.	.	.	.	pfam00612	IQ	IQ calmodulin-binding motif. Calmodulin-binding motif.	GO:0042384|cilium assembly;GO:0048496|maintenance of organ identity;GO:0045494|photoreceptor cell maintenance;	GO:0005813|centrosome;GO:0005737|cytoplasm;GO:0070062|extracellular exosome;GO:0045171|intercellular bridge;GO:0015630|microtubule cytoskeleton;GO:0005654|nucleoplasm;GO:0032391|photoreceptor connecting cilium;GO:0001750|photoreceptor outer segment;	GO:0005516|calmodulin binding;GO:0019899|enzyme binding;	K16774	IQCB1, NPHP5; IQ calmodulin-binding motif-containing protein 1
ENSDARG00000101030	6	4.778644152	5.034721194	6.416970707	2.842634661	3.968296103	3.230268632	7.459133675	5.37316787	7.088082122	6.459057831	6.649035231	6.850495303	9.137780607	9.936986305	5.131123655	si:ch73-158p21.3	protein_coding	chr4:74781811-74789618:-	gi|528478162|ref|XP_005168179.1|	1270	2.00E-167	PREDICTED: H-2 class II histocompatibility antigen, E-S beta chain isoform X1 [Danio rerio]	gi|229614664|emb|FP085412.9|	1561	0	Zebrafish DNA sequence from clone CH73-389K6 in linkage group 4, complete sequence	P04440	125	4.00E-30	HLA class II histocompatibility antigen, DP beta 1 chain	.	.	.	.	pfam07654	C1-set	Immunoglobulin C1-set domain.	GO:0019886|antigen processing and presentation of exogenous peptide antigen via MHC class II;GO:0060333|interferon-gamma-mediated signaling pathway;GO:0032729|positive regulation of interferon-gamma production;GO:0050870|positive regulation of T cell activation;GO:0042102|positive regulation of T cell proliferation;GO:0031295|T cell costimulation;GO:0050852|T cell receptor signaling pathway;	GO:0009986|cell surface;GO:0030669|clathrin-coated endocytic vesicle membrane;GO:0030666|endocytic vesicle membrane;GO:0010008|endosome membrane;GO:0012507|ER to Golgi transport vesicle membrane;GO:0000139|Golgi membrane;GO:0071556|integral component of lumenal side of endoplasmic reticulum membrane;GO:0005765|lysosomal membrane;GO:0016020|membrane;GO:0042613|MHC class II protein complex;GO:00058…	GO:0042605|peptide antigen binding;	K06752	MHC2; major histocompatibility complex, class II
ENSDARG00000079664	6	6.88607285	10.22271714	11.06789816	9.274832374	5.750224337	8.048060913	4.795556161	5.140471699	5.648842479	5.672955368	6.807915246	3.413285776	3.171431352	3.435738793	4.354596898	DDO	protein_coding	chr17:6799466-6814716:+	gi|559767220|ref|NP_001274017.1|	1700	0	D-aspartate oxidase [Danio rerio]	gi|161611442|gb|BC155659.1|	1782	0	Danio rerio zgc:172341, mRNA (cDNA clone MGC:172341 IMAGE:7052282), complete cds	P31228	360	1.00E-114	D-aspartate oxidase	ML2011	112	6.00E-26	COG0665	pfam01266	DAO	FAD dependent oxidoreductase. This family includes various FAD dependent oxidoreductases: Glycerol-3-phosphate dehydrogenase EC:1.1.99.5, Sarcosine oxidase beta subunit EC:1.5.3.1, D-alanine oxidase EC:1.4.99.1, D-aspartate oxidase EC:1.4.3.1.	GO:0046416|D-amino acid metabolic process;	GO:0005777|peroxisome;	GO:0008445|D-aspartate oxidase activity;GO:0071949|FAD binding;	K00272	DDO; D-aspartate oxidase [EC:1.4.3.1]
ENSDARG00000002463	4	1.553588098	1.011066375	1.032576261	3.009351861	3.297012481	6.78851364	1.106666806	1.956924399	1.355898171	0.989107218	1.13412233	1.000946054	0.781531297	1.041832236	0.968047935	arhgef37	protein_coding	chr14:24543424-24576409:+	gi|528499851|ref|XP_005173214.1|	3564	0	PREDICTED: rho guanine nucleotide exchange factor 37 [Danio rerio]	gi|583021991|emb|CU074314.7|	952	0	Zebrafish DNA sequence from clone DKEY-282E7 in linkage group 14, complete sequence	A1IGU3	459	3.00E-145	Rho guanine nucleotide exchange factor 37	.	.	.	.	pfam00621	RhoGEF	RhoGEF domain. Guanine nucleotide exchange factor for Rho/Rac/Cdc42-like GTPases Also called Dbl-homologous (DH) domain. It appears that pfam00169 domains invariably occur C-terminal to RhoGEF/DH domains.	GO:0035023|regulation of Rho protein signal transduction;	GO:0005737|cytoplasm;	GO:0005089|Rho guanyl-nucleotide exchange factor activity;	.	.
ENSDARG00000076135	1	9.334716147	9.569324907	7.642498252	13.07503959	9.155548255	10.13895556	16.5956151	24.67804944	17.94662207	24.91397185	23.06115575	24.74305684	24.02139796	15.41231127	20.8333218	mmrn2a	protein_coding	chr13:22489234-22515684:-	gi|322359371|ref|NP_001139178.1|	5230	0	multimerin-2 precursor [Danio rerio]	gi|322359370|ref|NM_001145706.1|	3778	0	Danio rerio multimerin 2a (mmrn2a), mRNA	A6H6E2	199	4.00E-51	Multimerin-2	.	.	.	.	pfam07546	EMI	EMI domain. The Pfam alignment is truncated at the C-terminus and does not include the final cysteine defined in Callebaut et al. This is to stop the family overlapping with other domains.	GO:0001525|angiogenesis;GO:0090051|negative regulation of cell migration involved in sprouting angiogenesis;GO:0030948|negative regulation of vascular endothelial growth factor receptor signaling pathway;	GO:0005604|basement membrane;GO:0070062|extracellular exosome;GO:0031012|extracellular matrix;GO:0005615|extracellular space;	.	.	.
ENSDARG00000073742	6	73.05310588	8.361612969	6.485876381	98.06471479	68.12044132	3.749245237	1.541863423	92.09631669	13.30319531	2.319001892	0.903585298	0.5220308	8.060454435	16.88060285	19.31139993	prss59.2	protein_coding	chr16:26143918-26145252:+	gi|530354710|ref|NP_001268923.1|	1203	1.00E-164	uncharacterized protein LOC100535672 precursor [Danio rerio]	gi|530354709|ref|NM_001281994.1|	846	0	Danio rerio protease, serine, 59, tandem duplicate 2 (prss59.2), mRNA	P35031	374	2.00E-129	Trypsin-1	VC1649	103	9.00E-24	COG5640	pfam00089	Trypsin	Trypsin.	GO:0007586|digestion;	GO:0005615|extracellular space;	GO:0046872|metal ion binding;GO:0004252|serine-type endopeptidase activity;	K01312	PRSS; trypsin [EC:3.4.21.4]
ENSDARG00000073743	6	6.92283798	7.830239172	4.390568101	4.601344437	6.441207063	2.068412539	2.192580963	2.709837268	2.250497744	2.716901816	4.09178982	2.5086932	2.640140991	5.251401994	5.473037354	slc25a37	protein_coding	chr8:50202096-50229269:+	gi|90652793|ref|NP_001035060.1|	1690	0	mitoferrin-1 [Danio rerio]	gi|190338574|gb|BC163811.1|	2583	0	Danio rerio solute carrier family 25, member 37, mRNA (cDNA clone MGC:195215 IMAGE:9039018), complete cds	Q287T7	655	0	Mitoferrin-1	.	.	.	.	pfam00153	Mito_carr	Mitochondrial carrier protein.	GO:0035162|embryonic hemopoiesis;GO:0048821|erythrocyte development;GO:0043249|erythrocyte maturation;GO:0055072|iron ion homeostasis;GO:0048250|mitochondrial iron ion transport;GO:0006412|translation;	GO:0016021|integral component of membrane;GO:0005743|mitochondrial inner membrane;GO:0005739|mitochondrion;	GO:0005381|iron ion transmembrane transporter activity;GO:0003735|structural constituent of ribosome;	K15113	SLC25A28_37, MFRN; solute carrier family 25 (mitochondrial iron transporter), member 28/37
ENSDARG00000004141	1	89.83174189	60.06162803	37.58540694	25.10345581	28.60867281	26.05399748	32.39937858	18.20175796	26.67287941	27.40590135	36.36976459	20.48228899	33.81648458	30.94852637	32.61752395	zgc:92630	protein_coding	chr15:15479601-15501508:+	gi|528501394|ref|XP_005157476.1|	1371	0	PREDICTED: dehydrogenase/reductase SDR family member 11-like isoform X1 [Danio rerio]	gi|50540455|ref|NM_001002696.1|	1015	0	Danio rerio zgc:92630 (zgc:92630), mRNA	Q71R50	402	1.00E-136	Dehydrogenase/reductase SDR family member 11	STM1511	149	4.00E-40	COG4221	pfam00106	adh_short	short chain dehydrogenase. This family contains a wide variety of dehydrogenases.	.	GO:0005576|extracellular region;	GO:0016491|oxidoreductase activity;	.	.
ENSDARG00000035891	3	0.59414036	0.127371406	0.212756655	0.227260337	0.275101094	0.3260267	0.355507968	0.477097792	0.427213059	0.589128135	0.696756004	0.927709782	0.580684739	0.577346199	0.187953586	acana	protein_coding	chr7:48489099-48514603:+	gi|528485817|ref|XP_686182.6|	3812	0	PREDICTED: aggrecan core protein isoform X2 [Danio rerio]	gi|28971534|emb|AL929208.9|	1757	0	Zebrafish DNA sequence from clone DKEY-56P7 in linkage group 7, complete sequence	Q29011	113	2.00E-24	Aggrecan core protein (Fragments)	.	.	.	.	pfam00193	Xlink	Extracellular link domain.	GO:0007155|cell adhesion;GO:0007417|central nervous system development;GO:0001501|skeletal system development;	GO:0005576|extracellular region;GO:0005578|proteinaceous extracellular matrix;	GO:0005201|extracellular matrix structural constituent;GO:0005540|hyaluronic acid binding;	K06792	AGC1, CSPG1; aggrecan 1
ENSDARG00000092066	4	1.451058235	0.622153753	0.377899434	1.963965763	1.007811625	0.442360613	0.4134527	0.731110458	0.090728236	0.943486537	1.722176666	0.527936805	2.252428648	2.379446145	2.086525621	si:dkey-228i19.34	sense_intronic	chr2:14821352-14823253:-	.	.	.	.	gi|134074432|emb|CT583708.8|	515	0	Zebrafish DNA sequence from clone DKEY-228I19 in linkage group 2, complete sequence	.	.	.	.	.	.	.	.	pfam15558	DUF4659	Domain of unknown function (DUF4659). This family of proteins is found in eukaryotes. Proteins in this family are typically between 427 and 674 amino acids in length. There are two completely conserved residues (D and I) that may be functionally important.	.	.	.	.	.
ENSDARG00000039863	1	14.41007779	13.84525565	13.28203912	25.47276852	21.6356162	26.59898408	22.71925826	23.93462351	26.51761529	26.96951087	24.94311807	24.84334091	26.25064276	14.41460376	20.80199511	lifrb	protein_coding	chr21:21207426-21224817:+	gi|528513549|ref|XP_005161249.1|	5103	0	PREDICTED: leukemia inhibitory factor receptor alpha b isoform X1 [Danio rerio]	gi|165974607|ref|NM_001113732.1|	3024	0	Danio rerio leukemia inhibitory factor receptor alpha b (lifrb), mRNA	O70535	253	1.00E-68	Leukemia inhibitory factor receptor	.	.	.	.	pfam09240	IL6Ra-bind	Interleukin-6 receptor alpha chain, binding. Members of this family adopt a structure consisting of an immunoglobulin-like beta-sandwich, with seven strands in two beta-sheets, in a Greek-key topology. They are required for binding to the cytokine Interleukin-6.	GO:0031100|organ regeneration;GO:0010656|negative regulation of muscle cell apoptotic process;GO:0048812|neuron projection morphogenesis;GO:0014070|response to organic cyclic compound;	GO:0016021|integral component of membrane;GO:0005886|plasma membrane;	GO:0019955|cytokine binding;GO:0004923|leukemia inhibitory factor receptor activity;GO:0046982|protein heterodimerization activity;	K05058	LIFR; leukemia inhibitory factor receptor
ENSDARG00000035544	1	25.64925262	40.442045	27.03458638	14.09326067	18.44962841	28.35894489	10.52014492	9.11287006	10.36418881	18.0951041	15.03908121	7.328394577	8.318584777	8.450988261	8.418007367	etnppl	protein_coding	chr7:59773896-59785278:+	gi|41055263|ref|NP_956743.1|	2657	0	ethanolamine-phosphate phospho-lyase [Danio rerio]	gi|41055262|ref|NM_200449.1|	1724	0	Danio rerio ethanolamine-phosphate phospho-lyase (etnppl), mRNA	Q7SY54	1028	0	Ethanolamine-phosphate phospho-lyase	SMb20973_3	457	9.00E-154	COG0160	pfam00202	Aminotran_3	Aminotransferase class-III.	GO:0035162|embryonic hemopoiesis;	GO:0005739|mitochondrion;	GO:0050459|ethanolamine-phosphate phospho-lyase activity;GO:0042802|identical protein binding;GO:0030170|pyridoxal phosphate binding;GO:0008483|transaminase activity;	K14286	AGXT2L1, ETNPPL; ethanolamine-phosphate phospho-lyase [EC:4.2.3.2]
ENSDARG00000092776	4	1.462189801	0.581477678	1.939514394	0.532964496	0.978912615	0.651998553	0.366878236	0.687237926	0.962001366	1.709884831	1.214894992	2.163677616	0.727711733	0.450645603	1.267795461	si:ch73-209l12.1	protein_coding	chr10:1505303-1560780:-	gi|688572962|ref|XP_009303336.1|	5068	0	PREDICTED: uncharacterized protein C5orf42 [Danio rerio]	gi|151302601|emb|CU424461.7|	1210	0	Zebrafish DNA sequence from clone CH73-209L12 in linkage group 10, complete sequence	Q8CE72	65.5	4.00E-11	Protein JBTS17	.	.	.	.	pfam15392	Joubert	Joubert syndrome-associated. This family of proteins is domain of unknown function, which is found in eukaryotes. However, mutations in the gene lead to Joubert's Syndrome, indicating that the protein that the gene encodes for is vital for correct ciliogenesis.	GO:0003279|cardiac septum development;GO:0021549|cerebellum development;GO:0042384|cilium assembly;GO:0060976|coronary vasculature development;GO:0042733|embryonic digit morphogenesis;GO:0001736|establishment of planar polarity;GO:0007507|heart development;GO:0001822|kidney development;GO:0060021|palate development;GO:1904491|protein localization to ciliary transition zone;GO:0003281|ventricular …	GO:0035869|ciliary transition zone;GO:0016021|integral component of membrane;	.	.	.
ENSDARG00000028517	1	13.29098597	16.28178585	25.55001706	29.80181499	29.37759314	49.80928924	12.56900589	14.90141237	20.48909932	19.59322041	17.77522566	16.36198422	11.29706873	11.79495223	14.72907959	hbp1	protein_coding	chr25:3325980-3345373:-	gi|347922035|ref|NP_001019602.2|	2015	0	HMG box-containing protein 1 [Danio rerio]	gi|347922034|ref|NM_001024431.2|	1590	0	Danio rerio HMG-box transcription factor 1 (hbp1), mRNA	O60381	494	3.00E-167	HMG box-containing protein 1	.	.	.	.	pfam08517	AXH	Ataxin-1 and HBP1 module (AXH). AXH is a protein-protein and RNA binding motif found in Ataxin-1 (ATX1). ATX1 is responsible for the autosomal-dominant neurodegenerative disorder Spinocerebellar ataxia type-1 (SCA1) in humans. The AXH module has also been identified in the apparently unrelated transcription factor HBP1 which is thought to be involved in the architectural regulation of chromatin a…	GO:0007050|cell cycle arrest;GO:0006355|regulation of transcription, DNA-templated;GO:0006351|transcription, DNA-templated;GO:0016055|Wnt signaling pathway;	GO:0005654|nucleoplasm;	GO:0003677|DNA binding;GO:0003723|RNA binding;	.	.
ENSDARG00000033727	4	0.098053368	0.135132521	0.239400577	0.173103164	0.127690418	0.224189562	0.167631163	0.926321923	0.965607653	1.530116941	1.205300514	0.758086127	0.761024645	0.535959903	1.099755137	il12ba	protein_coding	chr14:34610888-34618442:+	gi|159885737|tpe|CAJ44438.1|	1794	0	TPA: interleukin 12 p40.b [Danio rerio]	gi|111308139|gb|BC121764.1|	1337	0	Danio rerio interleukin 12Ba (natural killer cell stimulatory factor 2, cytotoxic lymphocyte maturation factor 2, p40), mRNA (cDNA clone MGC:152789 IMAGE:8153671), complete cds	P43432	101	7.00E-23	Interleukin-12 subunit beta	.	.	.	.	pfam10420	IL12p40_C	Cytokine interleukin-12p40 C-terminus. IL12p40_C is the largely beta stranded C-terminal, D3, domain of interleukin-12p40 or interleukin-12B. This interleukin is produced on stimulation by macrophage-engulfed micro-organisms and other stimuli, when it dimerises with interleukin-12p35 to form a heterodimer which then binds to receptors on natural killer cells to activate them to destroy the micro-…	GO:0007050|cell cycle arrest;GO:0016477|cell migration;GO:0007166|cell surface receptor signaling pathway;GO:0071346|cellular response to interferon-gamma;GO:0071222|cellular response to lipopolysaccharide;GO:0050829|defense response to Gram-negative bacterium;GO:0042832|defense response to protozoan;GO:0051607|defense response to virus;GO:0030101|natural killer cell activation;GO:0002323|natural…	GO:0005737|cytoplasm;GO:0005615|extracellular space;GO:0043514|interleukin-12 complex;GO:0070743|interleukin-23 complex;GO:0016020|membrane;	GO:0004896|cytokine receptor activity;GO:0008083|growth factor activity;GO:0042802|identical protein binding;GO:0042164|interleukin-12 alpha subunit binding;GO:0005143|interleukin-12 receptor binding;GO:0045519|interleukin-23 receptor binding;GO:0046982|protein heterodimerization activity;GO:0042803|protein homodimerization activity;	K05425	IL12B; interleukin 12B
ENSDARG00000087543	3	0.437667362	0.402114991	0.284954533	1.416537531	1.266564879	1.734519244	0.997642951	0.275646402	0.684134977	0	0.371029964	0	0	0	0.25173467	HIST1H4I	protein_coding	chr25:34551647-34552140:+	gi|545198640|ref|XP_001498258.2|	430	8.00E-51	PREDICTED: histone H4-like [Equus caballus]	gi|154623546|emb|CU302436.11|	494	0	Zebrafish DNA sequence from clone DKEY-108K21 in linkage group 25, complete sequence	Q28DR4	163	3.00E-51	Histone H4	.	.	.	.	pfam00125	Histone	Core histone H2A/H2B/H3/H4.	GO:0006352|DNA-templated transcription, initiation;GO:0006334|nucleosome assembly;	GO:0000786|nucleosome;GO:0005634|nucleus;	GO:0003677|DNA binding;	K11254	H4; histone H4
ENSDARG00000101256	1	10.64875102	10.93682042	8.654046607	6.663672525	5.844110813	12.52148985	4.112381639	9.718681214	13.25099051	6.954790269	9.978519668	11.19056549	3.050122523	2.910304696	4.068669908	CABZ01085052.1	protein_coding	chrKN150670.1:27-23993:-	gi|528502721|ref|XP_002664770.3|	2850	0	PREDICTED: eukaryotic translation initiation factor 4 gamma 1-like [Danio rerio]	gi|597767771|ref|XM_007247669.1|	527	0	PREDICTED: Astyanax mexicanus eukaryotic translation initiation factor 4 gamma, 1 (eif4g1), transcript variant X6, mRNA	Q6NZJ6	682	0	Eukaryotic translation initiation factor 4 gamma 1	.	.	.	.	pfam02854	MIF4G	MIF4G domain. MIF4G is named after Middle domain of eukaryotic initiation factor 4G (eIF4G). Also occurs in NMD2p and CBP80. The domain is rich in alpha-helices and may contain multiple alpha-helical repeats. In eIF4G, this domain binds eIF4A, eIF3, RNA and DNA.	GO:0001662|behavioral fear response;GO:0045666|positive regulation of neuron differentiation;GO:0006446|regulation of translational initiation;	GO:0005913|cell-cell adherens junction;GO:0005737|cytoplasm;GO:0016020|membrane;	GO:0098641|cadherin binding involved in cell-cell adhesion;GO:0008190|eukaryotic initiation factor 4E binding;GO:0044822|poly(A) RNA binding;GO:0003743|translation initiation factor activity;	K03260	EIF4G; translation initiation factor 4G
ENSDARG00000101254	6	0.789490735	4.559400854	6.608804659	8.063925562	7.245781804	3.094447478	3.181450585	2.55717038	1.480900626	1.319995249	1.625409306	6.052546238	5.154880031	4.520851136	3.697623808	si:ch211-157e21.22	lincRNA	chr4:7641374-7644352:-	gi|688546550|ref|XP_009298352.1|	135	1.00E-07	PREDICTED: uncharacterized protein LOC103910399 isoform X9 [Danio rerio]	gi|67514487|emb|BX649411.10|	295	8.00E-152	Zebrafish DNA sequence from clone CH211-157E21 in linkage group 4, complete sequence	.	.	.	.	.	.	.	.	pfam12743	ESR1_C	Oestrogen-type nuclear receptor final C-terminal. This is the very C-terminal region of a subfamily of nuclear receptors that includes oestrogen receptors and other subfamily 3 group A members. The actual function of this region is not known, but the domain is absent from all the other types of nuclear receptors. Oestrogen receptors modulate AP-1-dependent transcription through two distinct mecha…	.	.	.	.	.
ENSDARG00000096388	6	22.80914323	3.698174569	2.620672273	2.368658986	4.326531731	4.031834626	6.062140246	7.424125309	3.056045497	4.860461228	6.499602918	17.782765	8.595260622	13.0960947	13.39482857	ighv5-3	protein_coding	chr3:33968751-33969223:-	gi|688543912|ref|XP_009297896.1|	645	8.00E-83	PREDICTED: uncharacterized protein ighv4-5 [Danio rerio]	gi|39540484|emb|BX649502.4|	314	1.00E-162	Zebrafish DNA sequence from clone DKEY-204F11 in linkage group 3, complete sequence	P01753	105	3.00E-28	Ig heavy chain V region 186-1	.	.	.	.	pfam07686	V-set	Immunoglobulin V-set domain. This domain is found in antibodies as well as neural protein P0 and CTL4 amongst others.	.	.	GO:0003823|antigen binding;	.	.
ENSDARG00000100674	4	3.416012236	0.430555704	2.047440252	0.457194958	0.963577593	0.552647986	0.60086478	0.629119048	0.613005543	1.659819487	0.993180254	1.256304102	1.201743515	0.617903806	1.234206326	CABZ01060453.1	protein_coding	chr16:16050026-16097995:-	gi|688590442|ref|XP_009290448.1|	4096	0	PREDICTED: E2/E3 hybrid ubiquitin-protein ligase UBE2O [Danio rerio]	gi|253778011|emb|CU929496.7|	105	3.00E-45	Zebrafish DNA sequence from clone CH73-7A17 in linkage group 21, complete sequence	Q6ZPJ3	929	0	(E3-independent) E2 ubiquitin-conjugating enzyme UBE2O	YDR092w	69.7	4.00E-12	COG5078	pfam00179	UQ_con	Ubiquitin-conjugating enzyme. Proteins destined for proteasome-mediated degradation may be ubiquitinated. Ubiquitination follows conjugation of ubiquitin to a conserved cysteine residue of UBC homologues. TSG101 is one of several UBC homologues that lacks this active site cysteine.	GO:0030513|positive regulation of BMP signaling pathway;GO:0070534|protein K63-linked ubiquitination;GO:0006513|protein monoubiquitination;GO:0042147|retrograde transport, endosome to Golgi;	GO:0005737|cytoplasm;GO:0005829|cytosol;GO:0005634|nucleus;	GO:0005524|ATP binding;GO:0044822|poly(A) RNA binding;GO:0061631|ubiquitin conjugating enzyme activity;GO:0061630|ubiquitin protein ligase activity;GO:0031625|ubiquitin protein ligase binding;GO:0004842|ubiquitin-protein transferase activity;	K10581	UBE2O; ubiquitin-conjugating enzyme E2 O [EC:2.3.2.24]
ENSDARG00000061758	4	1.273246242	1.474291876	1.090164873	0.923747523	0.969112179	0.941140403	0.805092067	1.6806959	1.292306467	2.126383924	2.602357955	2.395540937	1.458998927	0.98514411	1.76061961	sh3pxd2ab	protein_coding	chr17:20502245-20539125:-	gi|326675577|ref|XP_003200390.1|	4340	0	PREDICTED: SH3 and PX domain-containing protein 2A [Danio rerio]	gi|209954236|emb|CU928227.4|	2113	0	Zebrafish DNA sequence from clone CH73-288O11 in linkage group 17, complete sequence	Q1LYG0	88.6	3.00E-16	SH3 and PX domain-containing protein 2A	.	.	.	.	pfam14604	SH3_9	Variant SH3 domain.	GO:0001755|neural crest cell migration;GO:0055114|oxidation-reduction process;GO:0071800|podosome assembly;GO:0048920|posterior lateral line neuromast primordium migration;GO:0072593|reactive oxygen species metabolic process;GO:0006801|superoxide metabolic process;	GO:0030054|cell junction;GO:0042995|cell projection;GO:0005737|cytoplasm;GO:0002102|podosome;	GO:0035091|phosphatidylinositol binding;GO:0016176|superoxide-generating NADPH oxidase activator activity;	.	.
ENSDARG00000100678	2	0	0.239475353	0	0.115036913	0.226286817	0.238378775	0.334201368	0	0	0.127106233	0	0	0	0	0.112438451	ifnphi4	protein_coding	chr12:4876950-4882012:-	gi|239915972|ref|NP_001155212.1|	928	1.00E-125	interferon phi 4 [Danio rerio]	gi|239915971|ref|NM_001161740.1|	553	0	Danio rerio interferon phi 4 (ifnphi4), mRNA	.	.	.	.	.	.	.	.	pfam10322	7TM_GPCR_Sru	Serpentine type 7TM GPCR chemoreceptor Sru. Chemoreception is mediated in Caenorhabditis elegans by members of the seven-transmembrane G-protein-coupled receptor class (7TM GPCRs) of proteins which are of the serpentine type. Sru is a member of the Srg superfamily of chemoreceptors. Chemoperception is one of the central senses of soil nematodes like C. elegans which are otherwise 'blind' and 'dea…	.	.	.	.	.
ENSDARG00000040623	1	7.115231439	8.132249879	7.748781422	19.68354756	15.17772285	22.16065333	12.93745748	12.21943541	11.36288429	9.991994568	10.3537186	15.42338196	11.85021017	10.22415112	11.80283302	fosl2	protein_coding	chr17:41313752-41329686:+	gi|131889259|ref|NP_001076467.1|	1328	3.00E-164	fos-related antigen 2 [Danio rerio]	gi|131889258|ref|NM_001082998.1|	3632	0	Danio rerio fos-like antigen 2 (fosl2), mRNA	P18625	301	9.00E-91	Fos-related antigen 2	.	.	.	.	pfam00170	bZIP_1	bZIP transcription factor. The Pfam entry includes the basic region and the leucine zipper region.	.	GO:0005634|nucleus;	GO:0000978|RNA polymerase II core promoter proximal region sequence-specific DNA binding;GO:0000982|transcription factor activity, RNA polymerase II core promoter proximal region sequence-specific binding;	K09030	FOSL2; fos-like antigen 2
ENSDARG00000015422	1	24.5510549	15.69616202	23.97688855	14.53067905	13.06371204	8.84686503	20.74435636	31.15648162	20.85075866	35.86211581	23.35469564	27.52778809	27.61153521	31.74531732	32.6510142	ppil1	protein_coding	chr6:40650252-40660136:-	gi|77683061|ref|NP_001029350.1|	825	1.00E-108	peptidyl-prolyl cis-trans isomerase-like 1 [Danio rerio]	gi|77683060|ref|NM_001034178.1|	584	0	Danio rerio peptidylprolyl isomerase (cyclophilin)-like 1 (ppil1), mRNA	Q9D0W5	283	5.00E-95	Peptidyl-prolyl cis-trans isomerase-like 1	SPAC57A10.03	184	8.00E-57	COG0652	pfam00160	Pro_isomerase	Cyclophilin type peptidyl-prolyl cis-trans isomerase/CLD. The peptidyl-prolyl cis-trans isomerases, also known as cyclophilins, share this domain of about 109 amino acids. Cyclophilins have been found in all organisms studied so far and catalyse peptidyl-prolyl isomerization during which the peptide bond preceding proline (the peptidyl-prolyl bond) is stabilized in the cis conformation. Mammalian…	GO:0006397|mRNA processing;GO:0006457|protein folding;GO:0008380|RNA splicing;	GO:0071013|catalytic step 2 spliceosome;GO:0070062|extracellular exosome;	GO:0003755|peptidyl-prolyl cis-trans isomerase activity;	K12733	PPIL1; peptidyl-prolyl cis-trans isomerase-like 1 [EC:5.2.1.8]
ENSDARG00000040621	6	2.293111726	2.641909028	2.132841503	2.249029744	1.801208781	3.229009057	2.209048539	5.39863224	6.04236304	3.336987988	4.289081401	6.356572444	2.511125092	2.354298613	3.265939497	lrrc32	protein_coding	chr10:252425-257043:+	gi|292617902|ref|XP_001920576.2|	3017	0	PREDICTED: leucine-rich repeat-containing protein 32 [Danio rerio]	gi|163914022|emb|CU469093.5|	1894	0	Zebrafish DNA sequence from clone CH73-211P17 in linkage group 10, complete sequence	Q14392	372	3.00E-117	Leucine-rich repeat-containing protein 32	SPBC19C7.03_1	57.4	1.00E-07	COG4886	pfam13855	LRR_8	Leucine rich repeat.	GO:0046007|negative regulation of activated T cell proliferation;GO:0050710|negative regulation of cytokine secretion;GO:0010628|positive regulation of gene expression;	GO:0005887|integral component of plasma membrane;	.	.	.
ENSDARG00000075954	6	7.427484936	4.485918964	3.903049741	2.362905732	1.538430728	1.999937439	10.53866381	9.118322423	8.34519405	4.964224872	7.287443879	8.727712802	8.160992339	8.397943519	7.904455471	serpinh1a	protein_coding	chr10:38568512-38577952:+	gi|160333597|ref|NP_001103844.1|	1968	0	serpin H1 precursor [Danio rerio]	gi|613410233|ref|NM_001110374.2|	3823	0	Danio rerio serpin peptidase inhibitor, clade H (heat shock protein 47), member 1a (serpinh1a), mRNA	P13731	595	0	Serpin H1	all0778	127	4.00E-30	COG4826	pfam00079	Serpin	Serpin (serine protease inhibitor). Structure is a multi-domain fold containing a bundle of helices and a beta sandwich.	GO:0003433|chondrocyte development involved in endochondral bone morphogenesis;GO:0032964|collagen biosynthetic process;GO:0030199|collagen fibril organization;GO:0051604|protein maturation;	GO:0005783|endoplasmic reticulum;GO:0005788|endoplasmic reticulum lumen;GO:0005793|endoplasmic reticulum-Golgi intermediate compartment;GO:0070062|extracellular exosome;GO:0045121|membrane raft;	GO:0005518|collagen binding;GO:0044822|poly(A) RNA binding;GO:0004867|serine-type endopeptidase inhibitor activity;	K09501	SERPINH1, HSP47; serpin peptidase inhibitor, clade H, member 1
ENSDARG00000009046	4	3.584047691	1.426927736	5.950389143	1.476362667	1.244624385	0.600935801	0.995679087	1.072199392	1.120473033	2.563405609	2.000250778	1.521309816	2.16354292	1.278818541	2.138753614	nphp1	protein_coding	chr17:22052501-22071305:+	gi|116004559|ref|NP_001070638.1|	3040	0	nephrocystin-1 [Danio rerio]	gi|116004558|ref|NM_001077170.1|	2184	0	Danio rerio nephronophthisis 1 (nphp1), mRNA	Q9QY53	68.2	3.00E-11	Nephrocystin-1	.	.	.	.	pfam00018	SH3_1	SH3 domain. SH3 (Src homology 3) domains are often indicative of a protein involved in signal transduction related to cytoskeletal organisation. First described in the Src cytoplasmic tyrosine kinase. The structure is a partly opened beta barrel.	GO:0030154|cell differentiation;GO:0030030|cell projection organization;GO:0007283|spermatogenesis;	GO:0005912|adherens junction;GO:0005923|bicellular tight junction;GO:0005911|cell-cell junction;GO:0005929|cilium;GO:0005737|cytoplasm;GO:0005856|cytoskeleton;	.	.	.
ENSDARG00000009040	1	11.83226093	4.671881448	3.390262987	147.2994598	63.75684814	47.93580456	3.970436202	5.311896918	7.428759012	8.726610379	9.616237479	13.25274199	8.053403048	5.033259806	5.905688528	si:ch73-141c7.1	protein_coding	chr3:17874235-17881198:-	gi|90111994|sp|Q6PBN4.2|CQ10X_DANRE	1251	1.00E-169	RecName: Full=Coenzyme Q-binding protein COQ10 homolog, mitochondrial; Flags: Precursor	gi|284005336|ref|NM_200789.2|	1148	0	Danio rerio si:ch73-141c7.1 (si:ch73-141c7.1), mRNA	Q6PBN4	180	9.00E-54	Coenzyme Q-binding protein COQ10 homolog, mitochondrial	BMEI0860	59.7	2.00E-10	COG2867	pfam03364	Polyketide_cyc	Polyketide cyclase / dehydrase and lipid transport. This family contains polyketide cylcases/dehydrases which are enzymes involved in polyketide synthesis. The family also includes proteins which are involved in the binding/transport of lipids.	.	GO:0005743|mitochondrial inner membrane;	.	K18588	COQ10; coenzyme Q-binding protein COQ10
ENSDARG00000102414	3	0.220208125	0.427120614	0.191162844	0.021597492	0.095588991	0.011188547	0.031372154	0.011557403	0.160634103	0.155112326	0.145195679	0.166912629	0.179350854	0.133739782	0.105548232	myhz1.1	protein_coding	chr22:281041-295380:-	gi|528514751|ref|XP_002667379.3|	9330	0	PREDICTED: myosin heavy chain, fast skeletal muscle isoform X2 [Danio rerio]	gi|2351222|dbj|D89992.1|	4759	0	Cyprinus carpio mRNA for myosin heavy chain, complete cds	Q90339	3516	0	Myosin heavy chain, fast skeletal muscle	SPCC645.05c	721	0	COG5022	pfam01576	Myosin_tail_1	Myosin tail. The myosin molecule is a multi-subunit complex made up of two heavy chains and four light chains it is a fundamental contractile protein found in all eukaryote cell types. This family consists of the coiled-coil myosin heavy chain tail region. The coiled-coil is composed of the tail from two molecules of myosin. These can then assemble into the macromolecular thick filament. The coil…	.	GO:0030016|myofibril;GO:0032982|myosin filament;	GO:0005524|ATP binding;GO:0003774|motor activity;	.	.
ENSDARG00000102418	6	8.576783374	29.29272993	6.067566346	2.835674413	2.710065357	3.104337217	5.984284468	3.292571933	8.754626155	5.497852372	7.116764541	5.237556405	4.05101078	4.058577775	2.771622007	KLHL25	protein_coding	chr25:11264267-11287112:-	gi|688616312|ref|XP_009296126.1|	3179	0	PREDICTED: kelch-like protein 25 isoform X1 [Danio rerio]	gi|387515785|emb|FQ323149.6|	1850	0	Zebrafish DNA sequence from clone CH73-313L2 in linkage group 25, complete sequence	Q0D2A9	1026	0	Kelch-like protein 25	.	.	.	.	pfam00651	BTB	BTB/POZ domain. The BTB (for BR-C, ttk and bab) or POZ (for Pox virus and Zinc finger) domain is present near the N-terminus of a fraction of zinc finger (pfam00096) proteins and in proteins that contain the pfam01344 motif such as Kelch and a family of pox virus proteins. The BTB/POZ domain mediates homomeric dimerization and in some instances heteromeric dimerization. The structure of the dimer…	GO:0016567|protein ubiquitination;GO:0042787|protein ubiquitination involved in ubiquitin-dependent protein catabolic process;GO:0006446|regulation of translational initiation;	GO:0031463|Cul3-RING ubiquitin ligase complex;	.	K10462	KLHL25_37, ENC1, ENC2; kelch-like protein 25/37 (ectoderm-neural cortex protein)
ENSDARG00000045367	1	12.38973464	13.38475704	7.401819601	11.33700366	12.88402755	7.388090785	14.89679449	22.68059563	16.17453625	23.28237211	28.43207911	28.11147129	20.74287368	23.69040647	16.7975824	tuba1b	protein_coding	chr23:35614754-35617716:+	gi|300244537|ref|NP_919369.2|	2273	0	tubulin alpha-1C chain [Danio rerio]	gi|300244536|ref|NM_194388.2|	1588	0	Danio rerio tubulin, alpha 1b (tuba1b), mRNA	P36220	225	2.00E-68	Tubulin alpha chain	SPBC800.05c	713	0	COG5023	pfam03953	Tubulin_C	Tubulin C-terminal domain. This family includes the tubulin alpha, beta and gamma chains. Members of this family are involved in polymer formation. Tubulins are GTPases. FtsZ can polymerize into tubes, sheets, and rings in vitro and is ubiquitous in eubacteria and archaea. Tubulin is the major component of microtubules. (The FtsZ GTPases have been split into their won family).	GO:0007017|microtubule-based process;	GO:0005737|cytoplasm;GO:0005874|microtubule;	GO:0005525|GTP binding;GO:0003924|GTPase activity;GO:0005200|structural constituent of cytoskeleton;	.	.
ENSDARG00000091813	1	10.47059976	6.645610649	8.374272872	13.43878813	19.21867403	20.21897706	9.074876815	9.616166256	10.39464329	14.33671893	11.15111963	9.921693785	9.30620317	10.0701248	7.070881524	si:dkey-21a6.5	protein_coding	chr17:43528752-43542557:-	gi|189531083|ref|XP_700224.3|	1603	0	PREDICTED: keratin-associated protein 16-1-like [Danio rerio]	gi|122891255|emb|CR405694.8|	1019	0	Zebrafish DNA sequence from clone DKEY-21A6 in linkage group 17, complete sequence	Q8IWY4	65.1	2.00E-09	Signal peptide, CUB and EGF-like domain-containing protein 1	.	.	.	.	pfam03302	VSP	Giardia variant-specific surface protein.	GO:0007512|adult heart development;GO:0007596|blood coagulation;GO:0045446|endothelial cell differentiation;GO:0006954|inflammatory response;GO:0009791|post-embryonic development;GO:0051260|protein homooligomerization;	GO:0009986|cell surface;GO:0009897|external side of plasma membrane;GO:0005615|extracellular space;GO:0019897|extrinsic component of plasma membrane;	GO:0005509|calcium ion binding;GO:0042802|identical protein binding;GO:0046982|protein heterodimerization activity;	.	.
ENSDARG00000103092	4	0.582545704	0.382303321	0.325098243	2.791438436	1.878494147	0.91332653	0.426820685	0.628957611	0.936617123	0.892825886	0.141099925	0.151390654	3.516590018	1.4404696	0.646196503	grem2b	protein_coding	chr12:47545974-47560418:-	gi|688581318|ref|XP_009305263.1|	848	4.00E-111	PREDICTED: gremlin-2 isoform X1 [Danio rerio]	gi|62955384|ref|NM_001017704.1|	848	0	Danio rerio gremlin 2, DAN family BMP antagonist b (grem2b), mRNA	Q9H772	236	3.00E-76	Gremlin-2	.	.	.	.	pfam03045	DAN	DAN domain. This domain contains 9 conserved cysteines and is extracellular. Therefore the cysteines may form disulphide bridges. This family of proteins has been termed the DAN family after the first member to be reported. This family includes DAN, Cerberus and Gremlin. The gremlin protein is an antagonist of bone morphogenetic protein signaling. It is postulated that all members of this family …	GO:0030509|BMP signaling pathway;GO:0019221|cytokine-mediated signaling pathway;GO:0048263|determination of dorsal identity;GO:0010172|embryonic body morphogenesis;GO:0060300|regulation of cytokine activity;GO:0038098|sequestering of BMP from receptor via BMP binding;	GO:0005576|extracellular region;GO:0005615|extracellular space;	GO:0008201|heparin binding;	.	.
ENSDARG00000103093	6	13.21891497	5.489321048	12.03453056	3.032444546	5.251847366	2.527185551	5.873170575	4.58601346	6.023790747	8.595015694	6.077970646	4.279570632	6.182832352	6.191308825	6.636665017	alg14	protein_coding	chr24:31263984-31286021:-	gi|54400686|ref|NP_001006092.1|	916	3.00E-121	UDP-N-acetylglucosamine transferase subunit ALG14 homolog [Danio rerio]	gi|54400685|ref|NM_001006092.1|	833	0	Danio rerio ALG14, UDP-N-acetylglucosaminyltransferase subunit (alg14), mRNA	Q6AY85	206	9.00E-64	UDP-N-acetylglucosamine transferase subunit ALG14 homolog	.	.	.	.	pfam08660	Alg14	Oligosaccharide biosynthesis protein Alg14 like. Alg14 is involved dolichol-linked oligosaccharide biosynthesis and anchors the catalytic subunit Alg13 to the ER membrane.	.	GO:0005789|endoplasmic reticulum membrane;GO:0016021|integral component of membrane;GO:0031965|nuclear membrane;	.	K07441	ALG14; beta-1,4-N-acetylglucosaminyltransferase [EC:2.4.1.141]
ENSDARG00000059361	3	0.131273635	0	0.769221526	1.738126032	0.455871075	1.320635781	0.561060585	0.124015777	0.369358119	0.256064652	0.111286462	0	0.113206459	0	0.113257675	slc39a4	protein_coding	chr19:1404826-1412035:-	gi|688598426|ref|XP_005173777.2|	730	8.00E-91	PREDICTED: zinc transporter ZIP4 isoform X1 [Danio rerio]	gi|195546797|ref|NM_001130777.1|	549	0	Danio rerio solute carrier family 39 (zinc transporter), member 4 (slc39a4), mRNA	Q1KZG0	197	8.00E-58	Zinc transporter ZIP4	RSc2227	89	1.00E-20	COG0428	pfam02535	Zip	ZIP Zinc transporter. The ZIP family consists of zinc transport proteins and many putative metal transporters. The main contribution to this family is from the Arabidopsis thaliana ZIP protein family these proteins are responsible for zinc uptake in the plant. Also found within this family are C. elegans proteins of unknown function which are annotated as being similar to human growth arrest indu…	GO:0034224|cellular response to zinc ion starvation;GO:0006882|cellular zinc ion homeostasis;GO:0071578|zinc II ion transmembrane import;	GO:0016324|apical plasma membrane;GO:0016023|cytoplasmic membrane-bounded vesicle;GO:0070062|extracellular exosome;GO:0005887|integral component of plasma membrane;GO:0055038|recycling endosome membrane;	GO:0005385|zinc ion transmembrane transporter activity;	K14710	SLC39A4, ZIP4; solute carrier family 39 (zinc transporter), member 4
ENSDARG00000070214	4	1.742131409	1.66379767	0.985014587	0.485613838	0.716430974	0.482178696	0.391885828	0.736284506	0.580470249	0.670703693	0.466383721	1.459494508	0.691877262	0.584714525	0.494421625	slc41a1	protein_coding	chr11:37681634-37730214:-	gi|292619083|ref|XP_002663867.1|	2736	0	PREDICTED: solute carrier family 41 member 1 [Danio rerio]	gi|599020501|emb|AL929022.8|	1272	0	Zebrafish DNA sequence from clone CH211-112F3 in linkage group 11, complete sequence	Q8BJA2	712	0	Solute carrier family 41 member 1	MA1437	70.5	2.00E-12	COG1824	pfam01769	MgtE	Divalent cation transporter. This region is the integral membrane part of the eubacterial MgtE family of magnesium transporters. Related regions are found also in archaebacterial and eukaryotic proteins. All the archaebacterial and eukaryotic examples have two copies of the region. This suggests that the eubacterial examples may act as dimers. Members of this family probably transport Mg2+ or oth…	GO:0010961|cellular magnesium ion homeostasis;GO:0071286|cellular response to magnesium ion;GO:0070838|divalent metal ion transport;GO:1903830|magnesium ion transmembrane transport;GO:0015693|magnesium ion transport;GO:0055085|transmembrane transport;	GO:0016323|basolateral plasma membrane;GO:0005623|cell;GO:0016021|integral component of membrane;GO:0005886|plasma membrane;GO:0043234|protein complex;	GO:0072509|divalent inorganic cation transmembrane transporter activity;GO:0015095|magnesium ion transmembrane transporter activity;GO:0022892|substrate-specific transporter activity;	K15122	SLC41A; solute carrier family 41
ENSDARG00000059367	6	5.682878009	5.577243641	3.952254686	3.914209985	6.615645156	3.701136643	4.084883033	7.686977897	8.277461063	8.607764715	12.99299355	10.61208695	15.03637404	15.09988585	14.85745842	mfap2	protein_coding	chr22:71558-75573:+	gi|116284235|gb|AAI24468.1|	754	4.00E-94	Zgc:153818 protein [Danio rerio]	gi|116284234|gb|BC124467.1|	1541	0	Danio rerio zgc:153818, mRNA (cDNA clone MGC:153818 IMAGE:7042972), complete cds	P55002	174	2.00E-49	Microfibrillar-associated protein 2	.	.	.	.	pfam05507	MAGP	Microfibril-associated glycoprotein (MAGP). This family consists of several mammalian microfibril-associated glycoprotein (MAGP) 1 and 2 proteins. MAGP1 and 2 are components of elastic fibres. MAGP-1 has been proposed to bind a C-terminal region of tropoelastin, the soluble precursor of elastin. MAGP-2 was found to interact with fibrillin-1 and -2, as well as fibulin-1, another component of elast…	GO:0030220|platelet formation;	GO:0001527|microfibril;	GO:0070051|fibrinogen binding;GO:0001968|fibronectin binding;	.	.
ENSDARG00000021555	6	1.267254375	1.724908763	2.498153985	3.024373254	2.770852975	3.884735708	1.644925133	2.106168294	1.69476563	1.853946436	2.447033831	1.3874601	1.55831216	0.940678566	1.538770181	park2	protein_coding	chr13:3219977-3383257:-	gi|62955239|ref|NP_001017635.1|	2328	0	E3 ubiquitin-protein ligase parkin [Danio rerio]	gi|207999385|emb|CU570981.12|	1730	0	Zebrafish DNA sequence from clone CH73-193I2 in linkage group 13, complete sequence	O60260	81.3	5.00E-18	E3 ubiquitin-protein ligase parkin	.	.	.	.	pfam00240	ubiquitin	Ubiquitin family. This family contains a number of ubiquitin-like proteins: SUMO (smt3 homologue) Nedd8, Elongin B, Rub1, and Parkin. A number of them are thought to carry a distinctive five-residue motif termed the proteasome-interacting motif (PIM), which may have a biologically significant role in protein delivery to proteasomes and recruitment of proteasomes to transcription sites.	GO:0008344|adult locomotory behavior;GO:0070842|aggresome assembly;GO:0044257|cellular protein catabolic process;GO:0044267|cellular protein metabolic process;GO:1903351|cellular response to dopamine;GO:0071287|cellular response to manganese ion;GO:0097237|cellular response to toxic substance;GO:0034620|cellular response to unfolded protein;GO:0007417|central nervous system development;GO:0042417…	GO:0016235|aggresome;GO:0005737|cytoplasm;GO:0005829|cytosol;GO:0005783|endoplasmic reticulum;GO:0005794|Golgi apparatus;GO:0097413|Lewy body;GO:0005739|mitochondrion;GO:0043005|neuron projection;GO:0005634|nucleus;GO:1990452|Parkin-FBXW7-Cul1 ubiquitin ligase complex;GO:0048471|perinuclear region of cytoplasm;GO:0098793|presynapse;GO:0000151|ubiquitin ligase complex;	GO:0003779|actin binding;GO:0008013|beta-catenin binding;GO:0051087|chaperone binding;GO:0097602|cullin family protein binding;GO:0019899|enzyme binding;GO:1990444|F-box domain binding;GO:0001664|G-protein coupled receptor binding;GO:0031072|heat shock protein binding;GO:0042826|histone deacetylase binding;GO:0030544|Hsp70 protein binding;GO:0042802|identical protein binding;GO:0019900|kinase bin…	K04556	PARK2; parkin [EC:2.3.2.27]
ENSDARG00000092894	1	17.58718504	21.72037218	22.15439609	7.255869361	8.353504916	12.1799751	21.24291456	23.53766808	28.92554136	17.58797383	27.33396226	32.28342122	17.41968143	34.0175788	20.89108411	si:ch211-114l13.9	protein_coding	chr1:57261853-57267291:-	gi|160420237|ref|NP_001104231.1|	671	3.00E-84	uncharacterized protein LOC796649 [Danio rerio]	gi|160420236|ref|NM_001110761.1|	1041	0	Danio rerio si:ch211-114l13.9 (si:ch211-114l13.9), mRNA	.	.	.	.	.	.	.	.	pfam02758	PYRIN	PAAD/DAPIN/Pyrin domain. This domain is predicted to contain 6 alpha helices and to have the same fold as the pfam00531 domain. This similarity may mean that this is a protein-protein interaction domain.	.	.	.	.	.
ENSDARG00000092892	6	7.672985382	5.30032801	2.719877532	3.888166001	3.232037839	4.080497559	3.862424252	4.027089592	4.291166502	11.39159543	8.432055837	9.770786261	5.48962047	5.980412203	4.633962777	si:dkey-23c22.5	protein_coding	chr8:22356525-22363396:+	gi|688567765|ref|XP_009302221.1|	1170	1.00E-151	PREDICTED: tumor necrosis factor receptor superfamily member 5 isoform X1 [Danio rerio]	gi|154623534|emb|CT737125.9|	1867	0	Zebrafish DNA sequence from clone DKEY-23C22 in linkage group 8, complete sequence	Q92956	94.4	1.00E-19	Tumor necrosis factor receptor superfamily member 14	.	.	.	.	pfam00020	TNFR_c6	TNFR/NGFR cysteine-rich region.	GO:0097190|apoptotic signaling pathway;GO:0007166|cell surface receptor signaling pathway;GO:0050829|defense response to Gram-negative bacterium;GO:0050830|defense response to Gram-positive bacterium;GO:0006955|immune response;GO:0006954|inflammatory response;GO:0007275|multicellular organismal development;GO:0046642|negative regulation of alpha-beta T cell proliferation;GO:0002741|positive regul…	GO:0009897|external side of plasma membrane;GO:0005887|integral component of plasma membrane;GO:0005886|plasma membrane;	GO:0005031|tumor necrosis factor-activated receptor activity;GO:0031625|ubiquitin protein ligase binding;GO:0001618|virus receptor activity;	K05152	TNFRSF14, HVEM; tumor necrosis factor receptor superfamily member 14
ENSDARG00000016733	6	10.88723492	5.53098688	9.840384851	5.954523233	7.116774033	2.538070221	3.759039443	6.856867555	5.005371423	11.07646487	9.519145933	7.766842811	20.61859821	13.06878531	18.01259991	psat1	protein_coding	chr5:68713689-68727260:-	gi|41054183|ref|NP_956113.1|	1966	0	phosphoserine aminotransferase isoform 1 [Danio rerio]	gi|41054182|ref|NM_199819.1|	1595	0	Danio rerio phosphoserine aminotransferase 1 (psat1), transcript variant 1, mRNA	Q99K85	594	0	Phosphoserine aminotransferase	PA3167	398	3.00E-133	COG1932	pfam00266	Aminotran_5	Aminotransferase class-V. This domain is found in amino transferases, and other enzymes including cysteine desulphurase EC:4.4.1.-.	GO:0006564|L-serine biosynthetic process;	GO:0005737|cytoplasm;GO:0070062|extracellular exosome;	GO:0004648|O-phospho-L-serine:2-oxoglutarate aminotransferase activity;	K00831	serC, PSAT1; phosphoserine aminotransferase [EC:2.6.1.52]
ENSDARG00000023952	4	1.223019874	1.021520135	0.825233954	3.650869107	3.204670977	6.467118342	2.166895265	2.163751966	2.043834773	1.062695959	1.470382246	1.355135536	1.438221522	0.972367858	0.729028576	fam167ab	protein_coding	chr20:18840935-18857670:+	gi|70887749|ref|NP_001020721.1|	1070	8.00E-135	protein FAM167A [Danio rerio]	gi|119310175|ref|NM_001025550.2|	2646	0	Danio rerio family with sequence similarity 167, member Ab (fam167ab), mRNA	Q5RFZ7	416	3.00E-136	Protein FAM167A	.	.	.	.	pfam11652	DUF3259	Protein of unknown function (DUF3259). This eukaryotic family of proteins has no known function.	GO:0006355|regulation of transcription, DNA-templated;	GO:0005622|intracellular;	GO:0046872|metal ion binding;GO:0046966|thyroid hormone receptor binding;	.	.
ENSDARG00000071103	4	1.480340851	0.78742085	2.130535729	1.100374707	1.893959504	1.638886291	0.199798223	0.736050393	0.365365058	1.291811566	0.462350132	0.637804735	1.746928645	0.851741683	1.949378856	si:dkey-222p3.1	protein_coding	chr22:28257847-28276827:-	gi|164414401|ref|NP_001091736.1|	870	5.00E-115	uncharacterized protein LOC100007529 precursor [Danio rerio]	gi|164414400|ref|NM_001098266.1|	907	0	Danio rerio si:dkey-222p3.1 (si:dkey-222p3.1), mRNA	Q7Z7D3	54.3	4.00E-07	V-set domain-containing T-cell activation inhibitor 1	.	.	.	.	pfam14362	DUF4407	Domain of unknown function (DUF4407). This family of proteins is found in bacteria. Proteins in this family are typically between 366 and 597 amino acids in length. There is a single completely conserved residue R that may be functionally important.	GO:0002250|adaptive immune response;GO:0072643|interferon-gamma secretion;GO:0072602|interleukin-4 secretion;GO:0050868|negative regulation of T cell activation;GO:1900042|positive regulation of interleukin-2 secretion;GO:0042102|positive regulation of T cell proliferation;GO:0001562|response to protozoan;	GO:0009897|external side of plasma membrane;GO:0016021|integral component of membrane;	.	K06747	B7H4, VTCN1; immune costimulatory protein B7-H4
ENSDARG00000011166	5	340.4040966	1030.972406	386.248816	501.563937	735.2672469	155.5228344	187.8309797	281.5277686	221.6922458	227.0589586	415.7029515	97.52548085	341.6487756	719.6057674	846.5861879	cahz	protein_coding	chr2:29493850-29501875:-	gi|18858379|ref|NP_571185.1|	1391	0	carbonic anhydrase [Danio rerio]	gi|41351396|gb|BC065611.1|	1509	0	Danio rerio carbonic anhydrase, mRNA (cDNA clone MGC:77128 IMAGE:6960975), complete cds	Q92051	540	0	Carbonic anhydrase	mll6384	135	4.00E-35	COG3338	pfam00194	Carb_anhydrase	Eukaryotic-type carbonic anhydrase.	GO:0015670|carbon dioxide transport;GO:0042539|hypotonic salinity response;GO:0006730|one-carbon metabolic process;	.	GO:0004089|carbonate dehydratase activity;GO:0008270|zinc ion binding;	K18245	CA2; carbonic anhydrase 2 [EC:4.2.1.1]
ENSDARG00000068374	1	5.456415416	5.667965709	4.197795901	69.02154333	91.80293953	127.0369184	8.186005704	6.922080838	8.375960079	6.060209954	5.494132825	7.272318617	4.494184479	2.901321878	3.977423345	si:ch211-132b12.7	protein_coding	chr18:40678423-40694600:-	gi|113682238|ref|NP_001038520.1|	2251	0	uncharacterized protein LOC564531 [Danio rerio]	gi|113682237|ref|NM_001045055.1|	2407	0	Danio rerio si:ch211-132b12.7 (si:ch211-132b12.7), mRNA	Q8R0W1	56.2	5.00E-07	CLOCK-interacting pacemaker	.	.	.	.	pfam06583	Neogenin_C	Neogenin C-terminus. This family represents the C-terminus of eukaryotic neogenin precursor proteins, which contains several potential phosphorylation sites. Neogenin is a member of the N-CAM family of cell adhesion molecules (and therefore contains multiple copies of pfam00047 and pfam00041) and is closely related to the DCC tumor suppressor gene product - these proteins may play an integral rol…	GO:0042754|negative regulation of circadian rhythm;GO:0045892|negative regulation of transcription, DNA-templated;GO:0048511|rhythmic process;GO:0006351|transcription, DNA-templated;	GO:0005829|cytosol;GO:0005634|nucleus;	.	.	.
ENSDARG00000044362	6	25.84706932	27.6215942	9.650655325	5.256298063	4.806497752	3.473686597	3.246683949	4.956587675	2.928305477	11.05046491	9.195820511	3.630400631	2.303920822	7.829347262	5.304192287	unc119b	protein_coding	chr21:39076395-39132506:-	gi|94536711|ref|NP_001035484.1|	1276	2.00E-168	unc-119 homolog b isoform 1 [Danio rerio]	gi|116812899|ref|NM_001040394.2|	2051	0	Danio rerio unc-119 homolog b (C. elegans) (unc119b), transcript variant 1, mRNA	Q9Z2R6	309	9.00E-98	Protein unc-119 homolog A	.	.	.	.	pfam05351	GMP_PDE_delta	GMP-PDE, delta subunit. GMP-PDE delta subunit was originally identified as a fourth subunit of rod-specific cGMP phosphodiesterase (PDE)(EC:3.1.4.35). The precise function of PDE delta subunit in the rod specific GMP-PDE complex is unclear. In addition, PDE delta subunit is not confined to photoreceptor cells but is widely distributed in different tissues. PDE delta subunit is thought to be a spe…	GO:0006897|endocytosis;GO:0042953|lipoprotein transport;GO:2001287|negative regulation of caveolin-mediated endocytosis;GO:1900186|negative regulation of clathrin-mediated endocytosis;GO:0061098|positive regulation of protein tyrosine kinase activity;GO:0015031|protein transport;GO:0050896|response to stimulus;GO:0007601|visual perception;	GO:0005813|centrosome;GO:0005737|cytoplasm;GO:0045171|intercellular bridge;GO:0051233|spindle midzone;GO:0000922|spindle pole;	GO:0008289|lipid binding;	.	.
ENSDARG00000074163	6	14.50863841	4.8626971	10.4919905	5.950144563	4.137692076	3.251035339	2.836010588	2.51244092	8.544763373	9.579128837	6.22793519	2.323185558	2.316161964	2.422785494	3.430379244	zgc:162879	protein_coding	chr18:25768306-25785021:-	gi|158513789|sp|A5WW21.1|RASEF_DANRE	3472	0	RecName: Full=Ras and EF-hand domain-containing protein	gi|148236628|ref|NM_001089427.1|	2500	0	Danio rerio zgc:162879 (zgc:162879), mRNA	A5WW21	1342	0	Ras and EF-hand domain-containing protein	.	.	.	.	pfam00071	Ras	Ras family. Includes sub-families Ras, Rab, Rac, Ral, Ran, Rap Ypt1 and more. Shares P-loop motif with GTP_EFTU, arf and myosin_head. See pfam00009 pfam00025, pfam00063. As regards Rab GTPases, these are important regulators of vesicle formation, motility and fusion. They share a fold in common with all Ras GTPases: this is a six-stranded beta-sheet surrounded by five alpha-helices.	GO:0007264|small GTPase mediated signal transduction;	GO:0048471|perinuclear region of cytoplasm;	GO:0005509|calcium ion binding;GO:0005525|GTP binding;	K17199	RASEF, RAB45; Ras and EF-hand domain-containing protein
ENSDARG00000074166	1	9.468353563	10.22825557	8.454200981	6.452403283	6.779250064	13.13838575	5.011927058	8.482201568	11.37245583	8.677309733	10.86762399	13.6276546	4.368082585	4.073234559	5.704159051	birc6	protein_coding	chr17:22567520-22721893:+	gi|688594389|ref|XP_009291312.1|	22934	0	PREDICTED: baculoviral IAP repeat-containing protein 6 isoform X2 [Danio rerio]	gi|617466774|ref|XM_007573917.1|	2642	0	PREDICTED: Poecilia formosa baculoviral IAP repeat containing 6 (birc6), mRNA	O88738	6939	0	Baculoviral IAP repeat-containing protein 6	.	.	.	.	pfam12356	DUF3643	Protein of unknown function (DUF3643). This family of proteins is found in eukaryotes. Proteins in this family are typically between 217 and 4852 amino acids in length. There is a conserved TLA sequence motif.	GO:0006915|apoptotic process;GO:0051301|cell division;GO:0060711|labyrinthine layer development;GO:0007067|mitotic nuclear division;GO:0043066|negative regulation of apoptotic process;GO:2001237|negative regulation of extrinsic apoptotic signaling pathway;GO:0001890|placenta development;GO:0008284|positive regulation of cell proliferation;GO:0016567|protein ubiquitination;GO:0042127|regulation of…	GO:0005737|cytoplasm;GO:0005768|endosome;GO:0016020|membrane;GO:0005815|microtubule organizing center;GO:0030496|midbody;GO:0000922|spindle pole;GO:0005802|trans-Golgi network;	GO:0004869|cysteine-type endopeptidase inhibitor activity;GO:0016874|ligase activity;GO:0061631|ubiquitin conjugating enzyme activity;GO:0004842|ubiquitin-protein transferase activity;	K10586	BIRC6, BRUCE; baculoviral IAP repeat-containing protein 6 (apollon) [EC:2.3.2.23]
ENSDARG00000030411	4	0.073465062	0.067497385	0.215240886	3.436918325	1.084262167	0.80625971	0.376785641	0.485823272	0.206705002	0.429906709	0.747354953	0.334108834	0.633540734	0.602340258	0.253530942	crygn2	protein_coding	chr24:41441956-41449024:-	gi|51010939|ref|NP_001003428.1|	982	2.00E-131	gamma-crystallin N-B [Danio rerio]	gi|55742602|ref|NM_001003428.2|	839	0	Danio rerio crystallin, gamma N2 (crygn2), mRNA	Q6DGY7	382	7.00E-133	Gamma-crystallin N-B	.	.	.	.	pfam00030	Crystall	Beta/Gamma crystallin. The alignment comprises two Greek key motifs since the similarity between them is very low.	.	.	GO:0005212|structural constituent of eye lens;	.	.
ENSDARG00000042908	6	3.827852645	3.244046731	2.19143605	19.89438046	18.56422237	23.20793102	6.120955189	8.635279853	6.654027095	3.958625861	3.9164274	2.911428055	3.813253832	2.465071989	3.530279064	hsh2d	protein_coding	chr22:15544923-15552019:-	gi|308387368|ref|NP_001017541.2|	1870	0	hematopoietic SH2 domain-containing protein homolog [Danio rerio]	gi|308387367|ref|NM_001017541.2|	2184	0	Danio rerio hematopoietic SH2 domain containing (hsh2d), mRNA	Q56A36	723	0	Hematopoietic SH2 domain-containing protein homolog	.	.	.	.	pfam00017	SH2	SH2 domain.	GO:0000470|maturation of LSU-rRNA;GO:0006412|translation;	GO:0022625|cytosolic large ribosomal subunit;	GO:0003723|RNA binding;GO:0003735|structural constituent of ribosome;	.	.
ENSDARG00000094809	4	0.624990575	0.86133249	0.267038692	0.24135929	0.169561802	0.428694187	1.168648145	1.918917285	6.557758206	2.209650583	4.039969987	2.131777344	1.044260557	1.672514439	1.280640441	ms4a17a.14	protein_coding	chr4:74942686-74994344:+	gi|62955317|ref|NP_001017670.1|	705	3.00E-89	membrane-spanning 4-domains, subfamily A, member 17A.11 [Danio rerio]	gi|60416130|gb|BC090734.1|	1717	0	Danio rerio cDNA clone IMAGE:6905347	Q99N10	65.9	4.00E-11	Membrane-spanning 4-domains subfamily A member 8	.	.	.	.	pfam04103	CD20	CD20-like family. This family includes the CD20 protein and the beta subunit of the high affinity receptor for IgE Fc. The high affinity receptor for IgE is a tetrameric structure consisting of a single IgE-binding alpha subunit, a single beta subunit, and two disulfide-linked gamma subunits. The alpha subunit of Fc epsilon RI and most Fc receptors are homologous members of the Ig superfamily. By…	.	GO:0016021|integral component of membrane;	.	.	.
ENSDARG00000104413	1	21.320243	7.684266666	19.96329579	7.232436778	11.93769785	7.493505247	6.519117879	5.115723966	6.753935511	15.89952971	5.167465578	5.699066044	8.703982372	7.851749323	10.32230983	rogdi	protein_coding	chr3:36286130-36298847:-	gi|41053919|ref|NP_956257.1|	1522	0	protein rogdi homolog [Danio rerio]	gi|41053918|ref|NM_199963.1|	1923	0	Danio rerio rogdi homolog (Drosophila) (rogdi), mRNA	Q7ZVT5	302	3.00E-105	Protein rogdi homolog	.	.	.	.	pfam10259	Rogdi_lz	Rogdi leucine zipper containing protein. This is a family of conserved proteins which have been suggested as containing leucine-zipper domains. A leucine zipper domain is a region of 30 amino acids with leucines repeating every seven or eight residues; these proteins do have many such leucines. The protein in Drosophila comes from the gene ROGDI.	.	GO:0005635|nuclear envelope;	.	.	.
ENSDARG00000020609	6	2.569312858	0.236060375	0.828044348	1.315398909	1.159911537	1.057407454	4.480323798	8.592502718	15.44627999	1.0524668	1.067278825	2.15001715	2.237855597	0.725599904	1.485189681	snap25a	protein_coding	chr20:35010165-35053351:+	gi|528511582|ref|XP_005160680.1|	1056	8.00E-143	PREDICTED: synaptosomal-associated protein 25-A isoform X1 [Danio rerio]	gi|41281620|ref|NM_131435.1|	2265	0	Danio rerio synaptosomal-associated protein, 25a (snap25a), mRNA	Q5TZ66	272	9.00E-91	Synaptosomal-associated protein 25-A	.	.	.	.	pfam05739	SNARE	SNARE domain. Most if not all vesicular membrane fusion events in eukaryotic cells are believed to be mediated by a conserved fusion machinery, the SNARE [soluble N-ethylmaleimide-sensitive factor (NSF) attachment protein (SNAP) receptors] machinery. The SNARE domain is thought to act as a protein-protein interaction module in the assembly of a SNARE protein complex.	GO:0000281|mitotic cytokinesis;GO:0031629|synaptic vesicle fusion to presynaptic membrane;GO:0016082|synaptic vesicle priming;	GO:0030054|cell junction;GO:0005737|cytoplasm;GO:0016020|membrane;GO:0043005|neuron projection;GO:0005886|plasma membrane;GO:0098793|presynapse;GO:0031201|SNARE complex;GO:0070032|synaptobrevin 2-SNAP-25-syntaxin-1a-complexin I complex;	GO:0005484|SNAP receptor activity;GO:0017075|syntaxin-1 binding;	K18211	SNAP25; synaptosomal-associated protein 25
ENSDARG00000020979	6	18.53308569	5.734772403	23.39295594	5.139236403	13.94960513	1.886847232	1.823324399	2.59322946	1.934963419	11.81727187	3.512813047	1.86065064	4.583625715	5.909276487	8.009889404	fam65c	protein_coding	chr6:51676228-51763504:+	gi|528483373|ref|XP_005166324.1|	4983	0	PREDICTED: protein FAM65C isoform X2 [Danio rerio]	gi|402693077|ref|NM_001012499.2|	3244	0	Danio rerio family with sequence similarity 65, member C (fam65c), mRNA	Q5EB20	68.2	9.00E-12	Protein FAM65C	.	.	.	.	pfam13646	HEAT_2	HEAT repeats. This family includes multiple HEAT repeats.	GO:0008285|negative regulation of cell proliferation;GO:0006950|response to stress;GO:0007165|signal transduction;	GO:0005737|cytoplasm;GO:0005654|nucleoplasm;	GO:0003677|DNA binding;GO:0046872|metal ion binding;GO:0000981|RNA polymerase II transcription factor activity, sequence-specific DNA binding;	.	.
ENSDARG00000089278	6	10.90818134	100.4282889	4.702047239	15.8042466	0.522491065	10.52661261	12.53952838	3.127061691	23.70677661	4.549023292	5.54840842	2.668615845	3.243755012	7.333083951	1.622611261	si:rp71-1f1.6	protein_coding	chr24:21869296-21870577:-	gi|528519869|ref|XP_005162800.1|	1469	0	PREDICTED: arylamine N-acetyltransferase, pineal gland isozyme NAT-3 [Danio rerio]	gi|27645817|emb|AL627129.8|	942	0	Zebrafish DNA sequence from clone RP71-1F1 in linkage group 24, complete sequence	P13914	166	4.00E-47	Arylamine N-acetyltransferase, pineal gland isozyme NAT-3	mlr4870	123	4.00E-32	COG2162	pfam00797	Acetyltransf_2	N-acetyltransferase. Arylamine N-acetyltransferase (NAT) is a cytosolic enzyme of approximately 30kDa. It facilitates the transfer of an acetyl group from Acetyl Coenzyme A on to a wide range of arylamine, N-hydroxyarylamines and hydrazines. Acetylation of these compounds generally results in inactivation. NAT is found in many species from Mycobacteria (M. tuberculosis, M. smegmatis etc) to man. …	GO:0008152|metabolic process;	.	GO:0004060|arylamine N-acetyltransferase activity;	K00622	nat; arylamine N-acetyltransferase [EC:2.3.1.5]
ENSDARG00000026726	5	41.25765659	43.63249684	65.66865716	77.40779215	65.08323082	54.35108657	124.5595502	67.33830089	66.39875767	107.0613016	104.2580642	109.9854948	135.4665581	110.398111	108.1874971	anxa1a	protein_coding	chr5:24978028-24983172:-	gi|32308156|ref|NP_861423.1|	1622	0	annexin A1 [Danio rerio]	gi|32308155|ref|NM_181758.1|	1208	0	Danio rerio annexin A1a (anxa1a), mRNA	A5A6M2	196	9.00E-59	Annexin A1	.	.	.	.	pfam00191	Annexin	Annexin. This family of annexins also includes giardin that has been shown to function as an annexin.	GO:0031532|actin cytoskeleton reorganization;GO:0002250|adaptive immune response;GO:0046632|alpha-beta T cell differentiation;GO:0050482|arachidonic acid secretion;GO:0071385|cellular response to glucocorticoid stimulus;GO:0007187|G-protein coupled receptor signaling pathway, coupled to cyclic nucleotide second messenger;GO:0071621|granulocyte chemotaxis;GO:0006954|inflammatory response;GO:004508…	GO:0016324|apical plasma membrane;GO:0016323|basolateral plasma membrane;GO:0001533|cornified envelope;GO:0005737|cytoplasm;GO:0030659|cytoplasmic vesicle membrane;GO:0031901|early endosome membrane;GO:0070062|extracellular exosome;GO:0005615|extracellular space;GO:0031313|extrinsic component of endosome membrane;GO:0031232|extrinsic component of external side of plasma membrane;GO:0005925|focal …	GO:0005509|calcium ion binding;GO:0005544|calcium-dependent phospholipid binding;GO:0019834|phospholipase A2 inhibitor activity;GO:0005198|structural molecule activity;	K17091	ANXA1; annexin A1
ENSDARG00000052494	4	1.8324071	1.322795526	0.878798486	1.371955553	1.178926065	1.226960718	1.734154841	2.581189205	2.132885917	1.97864441	2.163681662	2.485178117	2.497301078	2.66793661	3.430049179	pcdh18b	protein_coding	chr14:41805003-41812535:+	gi|169259800|ref|NP_001108571.1|	5686	0	protocadherin 18b precursor [Danio rerio]	gi|169259799|ref|NM_001115099.1|	3646	0	Danio rerio protocadherin 18b (pcdh18b), mRNA	A7MB46	1477	0	Protocadherin-18	.	.	.	.	pfam00028	Cadherin	Cadherin domain.	GO:0007420|brain development;GO:0007156|homophilic cell adhesion via plasma membrane adhesion molecules;	GO:0016021|integral component of membrane;GO:0005886|plasma membrane;	GO:0005509|calcium ion binding;	K16499	PCDHD2; protocadherin delta 2
ENSDARG00000039477	6	6.815931166	7.281701078	7.378943589	1.445804836	2.614657908	6.426877023	5.916556629	1.846871313	1.883076508	2.422007411	2.150015276	1.778174247	3.007274808	2.454845669	2.142513039	TERB2	protein_coding	chr7:30658309-30660944:-	gi|61806506|ref|NP_001013486.1|	1123	3.00E-150	uncharacterized protein C15orf43 homolog [Danio rerio]	gi|61806505|ref|NM_001013468.1|	1025	0	Danio rerio zgc:111992 (zgc:111992), mRNA	Q5BJD2	437	1.00E-151	Telomere repeats-binding bouquet formation protein 2	.	.	.	.	pfam15101	DUF4557	Domain of unknown function (DUF4557). This family of proteins is functionally uncharacterized. This family of proteins is found in eukaryotes. There is a conserved TVF sequence motif.	GO:0070197|meiotic attachment of telomere to nuclear envelope;GO:0045141|meiotic telomere clustering;GO:0007129|synapsis;	GO:0000784|nuclear chromosome, telomeric region;GO:0005637|nuclear inner membrane;	.	.	.
ENSDARG00000052948	1	106.6396782	40.73040592	167.6976723	3.087429739	1.341758234	5.207473125	0.278123938	42.5721246	0.152579087	0.0793338	4.068487335	79.68359947	37.4585607	113.0067825	4.491446574	zgc:195023	protein_coding	chr8:48614629-48615582:+	gi|192455608|ref|NP_001122213.1|	657	2.00E-83	C-type natriuretic peptide 3-like precursor [Danio rerio]	gi|76780825|emb|BX323876.21|	722	0	Zebrafish DNA sequence from clone CH211-215J19 in linkage group 8, complete sequence	Q800I8	94	3.00E-22	C-type natriuretic peptide 3	.	.	.	.	pfam00212	ANP	Atrial natriuretic peptide.	GO:0050880|regulation of blood vessel size;	GO:0005576|extracellular region;	.	.	.
ENSDARG00000062884	6	4.860974165	3.883573908	3.483067778	1.375846537	1.926590038	2.754375867	2.484050493	2.994926453	2.2051817	2.550837592	4.031278643	4.205141801	1.731461253	1.780966466	1.618281125	map3k2	protein_coding	chr6:9306909-9329987:-	gi|528481625|ref|XP_686613.2|	3099	0	PREDICTED: mitogen-activated protein kinase kinase kinase 2 [Danio rerio]	gi|597770289|ref|XM_007248882.1|	850	0	PREDICTED: Astyanax mexicanus mitogen-activated protein kinase kinase kinase 2 (map3k2), mRNA	Q9Y2U5	972	0	Mitogen-activated protein kinase kinase kinase 2	.	.	.	.	pfam00069	Pkinase	Protein kinase domain.	GO:0007257|activation of JUN kinase activity;GO:0000187|activation of MAPK activity;GO:0071260|cellular response to mechanical stimulus;GO:0045893|positive regulation of transcription, DNA-templated;GO:0006468|protein phosphorylation;	GO:0005737|cytoplasm;GO:0005829|cytosol;GO:0005654|nucleoplasm;	GO:0005524|ATP binding;GO:0004709|MAP kinase kinase kinase activity;GO:0046872|metal ion binding;GO:0004672|protein kinase activity;GO:0019901|protein kinase binding;GO:0004674|protein serine/threonine kinase activity;GO:0004702|receptor signaling protein serine/threonine kinase activity;	K04420	MAP3K2, MEKK2; mitogen-activated protein kinase kinase kinase 2 [EC:2.7.11.25]
ENSDARG00000091381	4	0.998248835	0.996912604	1.017290256	0.536353977	0.471005006	0.912959843	0.760548793	1.025062652	1.811422968	1.375740305	1.674122354	2.033083948	0.673716488	1.008253385	0.879972233	si:dkey-191j3.2	protein_coding	chr4:29748523-29764147:+	gi|167621538|ref|NP_001108057.1|	3496	0	uncharacterized protein LOC100136867 [Danio rerio]	gi|51571738|emb|BX530097.6|	2022	0	Zebrafish DNA sequence from clone DKEY-191J3 in linkage group 4, complete sequence	Q7RTR2	191	2.00E-48	Protein NLRC3	.	.	.	.	pfam05729	NACHT	NACHT domain. This NTPase domain is found in apoptosis proteins as well as those involved in MHC transcription activation. This family is closely related to pfam00931.	GO:0007249|I-kappaB kinase/NF-kappaB signaling;GO:0043124|negative regulation of I-kappaB kinase/NF-kappaB signaling;GO:0032715|negative regulation of interleukin-6 production;GO:0032088|negative regulation of NF-kappaB transcription factor activity;GO:0032720|negative regulation of tumor necrosis factor production;GO:0042110|T cell activation;	GO:0005737|cytoplasm;	GO:0005524|ATP binding;	.	.
ENSDARG00000059917	4	2.282258107	0.327256681	1.623348887	0.267829854	0.492483455	0.20510698	0.372130134	0.348960373	0.321692464	1.003587821	0.380244022	0.575966202	0.602959608	0.600906902	0.887775975	ccnj	protein_coding	chr13:50135391-50150769:-	gi|292620419|ref|XP_685772.4|	1803	0	PREDICTED: cyclin-J [Danio rerio]	gi|635055348|ref|XM_007963689.1|	180	6.00E-87	PREDICTED: Chlorocebus sabaeus cyclin J (CCNJ), transcript variant X2, mRNA	Q3TZI6	459	3.00E-145	Cyclin-J	SPBC582.03	66.6	4.00E-10	COG5024	pfam02984	Cyclin_C	Cyclin, C-terminal domain. Cyclins regulate cyclin dependent kinases (CDKs). Human CCNO is a Uracil-DNA glycosylase that is related to other cyclins. Cyclins contain two domains of similar all-alpha fold, of which this family corresponds with the C-terminal domain.	.	GO:0005634|nucleus;	.	.	.
ENSDARG00000055064	5	133.1986268	146.394086	164.1744244	202.2719498	228.6679422	243.9421433	252.5568389	282.1213778	194.240427	230.4167952	288.9152577	368.6264196	368.5810788	332.3836383	280.1273072	prdx5	protein_coding	chr21:26620617-26628034:+	gi|66773128|ref|NP_001019577.1|	850	2.00E-112	peroxiredoxin-5, mitochondrial [Danio rerio]	gi|66773127|ref|NM_001024406.1|	702	0	Danio rerio peroxiredoxin 5 (prdx5), mRNA	P30044	212	3.00E-66	Peroxiredoxin-5, mitochondrial	VC1350	143	6.00E-41	COG0678	pfam08534	Redoxin	Redoxin. This family of redoxins includes peroxiredoxin, thioredoxin and glutaredoxin proteins.	GO:0045454|cell redox homeostasis;GO:0034614|cellular response to reactive oxygen species;GO:0042744|hydrogen peroxide catabolic process;GO:0006954|inflammatory response;GO:0070995|NADPH oxidation;GO:0043066|negative regulation of apoptotic process;GO:0051354|negative regulation of oxidoreductase activity;GO:0016480|negative regulation of transcription from RNA polymerase III promoter;GO:0032967|…	GO:0005737|cytoplasm;GO:0031410|cytoplasmic vesicle;GO:0005829|cytosol;GO:0070062|extracellular exosome;GO:0005615|extracellular space;GO:0043231|intracellular membrane-bounded organelle;GO:0005759|mitochondrial matrix;GO:0005739|mitochondrion;GO:0005634|nucleus;GO:0048471|perinuclear region of cytoplasm;GO:0005782|peroxisomal matrix;GO:0005777|peroxisome;	GO:0016209|antioxidant activity;GO:0043027|cysteine-type endopeptidase inhibitor activity involved in apoptotic process;GO:0004601|peroxidase activity;GO:0051920|peroxiredoxin activity;GO:0072541|peroxynitrite reductase activity;GO:0046983|protein dimerization activity;GO:0005102|receptor binding;GO:0001016|RNA polymerase III regulatory region DNA binding;GO:0008379|thioredoxin peroxidase activit…	K11187	PRDX5; peroxiredoxin 5, atypical 2-Cys peroxiredoxin [EC:1.11.1.15]
ENSDARG00000098550	4	1.412667984	2.861795879	2.30692304	1.533147801	1.548123229	0.995453525	0.524588041	0.995453757	1.292338006	1.2196807	1.040521264	1.116408781	0.998559544	0.82279834	1.158853112	WNK4	protein_coding	chr12:3542373-3622432:+	gi|528495293|ref|XP_002663933.3|	4290	0	PREDICTED: serine/threonine-protein kinase WNK4-like, partial [Danio rerio]	gi|528495294|ref|XM_005172962.1|	641	0	PREDICTED: Danio rerio serine/threonine-protein kinase WNK4-like (LOC101882007), partial mRNA	Q96J92	713	0	Serine/threonine-protein kinase WNK4	.	.	.	.	pfam00069	Pkinase	Protein kinase domain.	GO:0006821|chloride transport;GO:0072156|distal tubule morphogenesis;GO:0035556|intracellular signal transduction;GO:0050801|ion homeostasis;GO:0006811|ion transport;GO:0090188|negative regulation of pancreatic juice secretion;GO:0010766|negative regulation of sodium ion transport;GO:0032414|positive regulation of ion transmembrane transporter activity;GO:0008104|protein localization;GO:0006468|p…	GO:0005923|bicellular tight junction;GO:0005829|cytosol;GO:0016020|membrane;	GO:0005524|ATP binding;GO:0019869|chloride channel inhibitor activity;GO:0004674|protein serine/threonine kinase activity;	K08867	WNK, PRKWNK; WNK lysine deficient protein kinase [EC:2.7.11.1]
ENSDARG00000104012	4	1.667862713	4.193881397	1.971774301	1.084793884	0.990728338	0.16056451	0.450215242	0.580502594	0.329318079	1.027377544	1.265087145	0.638754235	1.741118098	1.599393132	1.741905799	si:rp71-82p7.1	lincRNA	chr7:54625036-54634126:-	.	.	.	.	gi|54792564|emb|BX323041.9|	543	0	Zebrafish DNA sequence from clone RP71-82P7 in linkage group 7, complete sequence	.	.	.	.	.	.	.	.	pfam12114	Period_C	Period protein 2/3C-terminal region. This domain is found in eukaryotes. This domain is typically between 164 to 200 amino acids in length. This domain is found associated with pfam08447.	.	.	.	.	.
ENSDARG00000104540	4	0.149459199	0.549273622	0.408698787	1.609514798	1.764680524	1.39423405	2.018561479	7.313947447	2.046559563	1.224458471	0.760219006	0.516586857	3.093339496	0.953101652	3.275265394	cyp2aa4	protein_coding	chr23:42396735-42413136:+	gi|146455163|dbj|BAF62160.1|	2568	0	cytochrome P450 [Danio rerio]	gi|402743370|ref|NM_001002092.2|	1838	0	Danio rerio cytochrome P450, family 2, subfamily AA, polypeptide 4 (cyp2aa4), mRNA	O54750	395	8.00E-129	Cytochrome P450 2J6	alr1450	96.3	3.00E-20	COG2124	pfam00067	p450	Cytochrome P450. Cytochrome P450s are haem-thiolate proteins involved in the oxidative degradation of various compounds. They are particularly well known for their role in the degradation of environmental toxins and mutagens. They can be divided into 4 classes, according to the method by which electrons from NAD(P)H are delivered to the catalytic site. Sequence conservation is relatively low with…	GO:0019369|arachidonic acid metabolic process;GO:0019373|epoxygenase P450 pathway;GO:0007565|female pregnancy;GO:0043651|linoleic acid metabolic process;GO:0014070|response to organic cyclic compound;GO:0001523|retinoid metabolic process;	GO:0005783|endoplasmic reticulum;GO:0005789|endoplasmic reticulum membrane;GO:0070062|extracellular exosome;GO:0031090|organelle membrane;	GO:0008405|arachidonic acid 11,12-epoxygenase activity;GO:0008404|arachidonic acid 14,15-epoxygenase activity;GO:0008392|arachidonic acid epoxygenase activity;GO:0070330|aromatase activity;GO:0020037|heme binding;GO:0005506|iron ion binding;GO:0071614|linoleic acid epoxygenase activity;GO:0003958|NADPH-hemoprotein reductase activity;GO:0008395|steroid hydroxylase activity;	K07418	CYP2J; cytochrome P450, family 2, subfamily J [EC:1.14.14.1]
ENSDARG00000104015	4	1.446092722	1.019642025	0.689714961	0.593704272	0.64232511	0.522864877	1.351100912	1.62030692	1.640136191	1.771183545	1.197407015	1.774160006	0.928049964	1.34802794	1.856939647	fgfr1bl	protein_coding	chr22:6939631-6961668:-	gi|528515446|ref|XP_698054.5|	2637	0	PREDICTED: fibroblast growth factor receptor 1-like [Danio rerio]	gi|219926699|emb|CU929149.6|	508	0	Zebrafish DNA sequence from clone CH73-213K20 in linkage group 22, complete sequence	Q90Z00	332	5.00E-100	Fibroblast growth factor receptor 1-A	.	.	.	.	pfam07679	I-set	Immunoglobulin I-set domain.	GO:0060249|anatomical structure homeostasis;GO:0048738|cardiac muscle tissue development;GO:0009953|dorsal/ventral pattern formation;GO:0008543|fibroblast growth factor receptor signaling pathway;GO:0031101|fin regeneration;GO:0001889|liver development;GO:0042664|negative regulation of endodermal cell fate specification;GO:0021628|olfactory nerve formation;GO:0071699|olfactory placode morphogenes…	GO:0016023|cytoplasmic membrane-bounded vesicle;GO:0005829|cytosol;GO:0005887|integral component of plasma membrane;GO:0005634|nucleus;GO:0005886|plasma membrane;	GO:0005524|ATP binding;GO:0017134|fibroblast growth factor binding;GO:0005007|fibroblast growth factor-activated receptor activity;GO:0008201|heparin binding;	K04362	FGFR1; fibroblast growth factor receptor 1 [EC:2.7.10.1]
ENSDARG00000104014	4	0.779126764	0.894796421	0.88772322	0.315211505	0.648230187	1.098528855	0.416246299	0.858725459	0.608941763	0.411606627	0.522895983	0.826783916	0.335947816	0.266169276	0.280083169	MARK1	protein_coding	chr22:38371563-38392677:+	gi|167555209|ref|NP_001107948.1|	2522	0	serine/threonine-protein kinase MARK1 [Danio rerio]	gi|167555208|ref|NM_001114476.1|	960	0	Danio rerio MAP/microtubule affinity-regulating kinase 1 (mark1), mRNA	Q03141	766	0	MAP/microtubule affinity-regulating kinase 3	.	.	.	.	pfam00069	Pkinase	Protein kinase domain.	GO:0030010|establishment of cell polarity;GO:0035556|intracellular signal transduction;GO:0000226|microtubule cytoskeleton organization;GO:0001764|neuron migration;GO:0006468|protein phosphorylation;GO:0016055|Wnt signaling pathway;	GO:0005737|cytoplasm;GO:0005856|cytoskeleton;GO:0005886|plasma membrane;	GO:0005524|ATP binding;GO:0000287|magnesium ion binding;GO:0070300|phosphatidic acid binding;GO:0005546|phosphatidylinositol-4,5-bisphosphate binding;GO:0001786|phosphatidylserine binding;GO:0004674|protein serine/threonine kinase activity;GO:0050321|tau-protein kinase activity;	K08798	MARK; MAP/microtubule affinity-regulating kinase [EC:2.7.11.1]
ENSDARG00000053542	5	43.46568579	34.20433431	30.31403735	22.71057332	29.86695291	33.20097349	64.93667412	59.66039292	58.36083035	50.32916975	63.9466004	68.69901126	69.84034829	65.83265425	62.01029998	kctd12.2	protein_coding	chr1:33563357-33564835:+	gi|158254037|gb|AAI54160.1|	1418	0	Kctd12.2 protein [Danio rerio]	gi|68051169|emb|BX901972.12|	1479	0	Zebrafish DNA sequence from clone DKEY-24H22 in linkage group 1, complete sequence	Q6WVG3	343	7.00E-113	BTB/POZ domain-containing protein KCTD12	.	.	.	.	pfam02214	BTB_2	BTB/POZ domain. In voltage-gated K+ channels this domain is responsible for subfamily-specific assembly of alpha-subunits into functional tetrameric channels. In KCTD1 this domain functions as a transcriptional repressor. It also mediates homomultimerization of KCTD1 and interaction of KCTD1 with the transcription factor AP-2-alpha.	GO:0051260|protein homooligomerization;GO:0008277|regulation of G-protein coupled receptor protein signaling pathway;	GO:0030054|cell junction;GO:0070062|extracellular exosome;GO:0045211|postsynaptic membrane;GO:0042734|presynaptic membrane;GO:0043235|receptor complex;	GO:0044822|poly(A) RNA binding;	.	.
ENSDARG00000098004	6	1.698308037	2.320523407	3.657404343	1.76816253	3.893979105	3.98258195	3.27564459	6.62334168	8.535854962	3.355220551	4.097695278	3.208292701	3.229564809	5.077855755	2.103923841	ftr91	protein_coding	chr15:41800046-41805169:-	gi|68394483|ref|XP_686669.1|	2724	0	PREDICTED: tripartite motif-containing protein 16-like isoform X1 [Danio rerio]	gi|319803103|ref|NM_001007387.2|	899	0	Danio rerio finTRIM family, member 72 (ftr72), mRNA	Q99PP9	187	1.00E-50	Tripartite motif-containing protein 16	.	.	.	.	pfam13765	PRY	SPRY-associated domain. SPRY and PRY domains occur on PYRIN proteins. Their function is not known.	GO:0043966|histone H3 acetylation;GO:0043967|histone H4 acetylation;GO:0050718|positive regulation of interleukin-1 beta secretion;GO:0045618|positive regulation of keratinocyte differentiation;GO:0048386|positive regulation of retinoic acid receptor signaling pathway;GO:0045893|positive regulation of transcription, DNA-templated;GO:0060416|response to growth hormone;	GO:0005737|cytoplasm;GO:0016605|PML body;	GO:0003677|DNA binding;GO:0019966|interleukin-1 binding;GO:0032089|NACHT domain binding;GO:0008270|zinc ion binding;	K12006	TRIM16; tripartite motif-containing protein 16
ENSDARG00000053547	2	0.171090188	0.036986418	0.137602678	0.088835935	1.197019661	0.073634108	0	0.019015406	0.00943898	0.049078164	0	0.073232401	0.017358008	0.082515821	0.104195163	jakmip2	protein_coding	chr21:43034658-43083985:-	gi|528514498|ref|XP_001921776.2|	3788	0	PREDICTED: janus kinase and microtubule-interacting protein 2 isoform X2 [Danio rerio]	gi|161512467|emb|CU462980.14|	4306	0	Zebrafish DNA sequence from clone CH73-280B7 in linkage group 21, complete sequence	Q96AA8	1182	0	Janus kinase and microtubule-interacting protein 2	.	.	.	.	pfam05557	MAD	Mitotic checkpoint protein. This family consists of several eukaryotic mitotic checkpoint (Mitotic arrest deficient or MAD) proteins. The mitotic spindle checkpoint monitors proper attachment of the bipolar spindle to the kinetochores of aligned sister chromatids and causes a cell cycle arrest in prometaphase when failures occur. Multiple components of the mitotic spindle checkpoint have been ide…	.	GO:0005794|Golgi apparatus;	.	.	.
ENSDARG00000056443	1	12.05954535	16.54932298	11.21489321	4.746153897	5.868383526	7.042527109	17.54733798	13.64233023	29.14061358	15.97579381	27.10505869	31.92894652	8.313209089	33.08120745	14.49671078	zgc:152753	protein_coding	chr3:2452805-2459471:-	gi|63101119|gb|AAH95827.1|	1552	0	Zgc:152753 [Danio rerio]	gi|63101118|gb|BC095827.1|	3736	0	Danio rerio zgc:152753, mRNA (cDNA clone IMAGE:7408209)	Q9NUV9	123	1.00E-28	GTPase IMAP family member 4	.	.	.	.	pfam04548	AIG1	AIG1 family. Arabidopsis protein AIG1 appears to be involved in plant resistance to bacteria.	.	GO:0005829|cytosol;	GO:0005525|GTP binding;	.	.
ENSDARG00000006760	1	49.96642888	103.5170954	46.61633028	9.720462745	18.23633034	43.83363097	43.71604685	26.69333379	29.29377431	46.85983133	63.98662919	31.68888761	19.80429732	10.49624573	27.96171252	slc24a3	protein_coding	chr13:26943451-27079551:+	gi|528498257|ref|XP_685302.4|	2935	0	PREDICTED: sodium/potassium/calcium exchanger 3 [Danio rerio]	gi|597777250|ref|XM_007252227.1|	782	0	PREDICTED: Astyanax mexicanus sodium/potassium/calcium exchanger 3-like (LOC103023188), mRNA	Q9HC58	805	0	Sodium/potassium/calcium exchanger 3	slr0681	70.1	6.00E-12	COG0530	pfam01699	Na_Ca_ex	Sodium/calcium exchanger protein. This is a family of sodium/calcium exchanger integral membrane proteins. This family covers the integral membrane regions of the proteins. Sodium/calcium exchangers regulate intracellular Ca2+ concentrations in many cells; cardiac myocytes, epithelial cells, neurons retinal rod photoreceptors and smooth muscle cells. Ca2+ is moved into or out of the cytosol depen…	GO:0006874|cellular calcium ion homeostasis;GO:0006811|ion transport;	GO:0005887|integral component of plasma membrane;GO:0005886|plasma membrane;	GO:0005262|calcium channel activity;GO:0005509|calcium ion binding;GO:0008273|calcium, potassium:sodium antiporter activity;GO:0030955|potassium ion binding;GO:0031402|sodium ion binding;GO:0015293|symporter activity;	K13751	SLC24A3, NCKX3; solute carrier family 24 (sodium/potassium/calcium exchanger), member 3
ENSDARG00000068593	4	41.04094835	0.101091504	51.57894567	0.679859373	19.58244661	0.100628597	0	0.623676287	0.103194711	32.08646466	0.186553488	0.100079623	8.729514253	4.911602009	10.91682947	CU326366.2	protein_coding	chr10:43059021-43069864:-	gi|688575587|ref|XP_005169294.2|	1158	2.00E-158	PREDICTED: zinc metalloproteinase nas-15-like [Danio rerio]	gi|218083867|emb|CU326366.20|	176	1.00E-85	Zebrafish DNA sequence from clone DKEYP-117G7 in linkage group 10, complete sequence	P55112	135	3.00E-36	Zinc metalloproteinase nas-4	.	.	.	.	pfam01400	Astacin	Astacin (Peptidase family M12A). The members of this family are enzymes that cleave peptides. These proteases require zinc for catalysis. Members of this family contain two conserved disulphide bridges, these are joined 1-4 and 2-3. Members of this family have an amino terminal propeptide which is cleaved to give the active protease domain. All other linked domains are found to the carboxyl termi…	.	GO:0005576|extracellular region;	GO:0004222|metalloendopeptidase activity;GO:0008270|zinc ion binding;	.	.
ENSDARG00000090036	6	4.087508321	6.97445159	5.012404915	1.84471133	1.547531638	2.164265803	1.917750538	2.729193249	4.294792247	3.38709655	4.507315252	1.733148617	2.994878082	2.939780064	1.935619546	RHOBTB3	protein_coding	chr21:11688855-11727751:-	gi|528513308|ref|XP_691270.6|	3227	0	PREDICTED: rho-related BTB domain-containing protein 3 [Danio rerio]	gi|597780819|ref|XM_007253931.1|	763	0	PREDICTED: Astyanax mexicanus Rho-related BTB domain containing 3 (rhobtb3), transcript variant X1, mRNA	O94955	438	9.00E-145	Rho-related BTB domain-containing protein 3	.	.	.	.	pfam00651	BTB	BTB/POZ domain. The BTB (for BR-C, ttk and bab) or POZ (for Pox virus and Zinc finger) domain is present near the N-terminus of a fraction of zinc finger (pfam00096) proteins and in proteins that contain the pfam01344 motif such as Kelch and a family of pox virus proteins. The BTB/POZ domain mediates homomeric dimerization and in some instances heteromeric dimerization. The structure of the dimer…	GO:0042147|retrograde transport, endosome to Golgi;GO:0007264|small GTPase mediated signal transduction;	GO:0005829|cytosol;GO:0070062|extracellular exosome;GO:0032588|trans-Golgi network membrane;	GO:0005524|ATP binding;GO:0016887|ATPase activity;GO:0017137|Rab GTPase binding;	K07869	RHOBTB3; Rho-related BTB domain-containing protein 3
ENSDARG00000078508	4	2.200248873	1.288888195	0.980656968	1.909570325	2.942203874	4.59174032	1.249634417	1.443860763	2.139749363	1.908286339	2.040506422	1.685645988	1.01238654	0.692805458	1.172096843	KCP	protein_coding	chr18:6939348-7016213:-	gi|528507423|ref|XP_697494.6|	9513	0	PREDICTED: kielin/chordin-like protein [Danio rerio]	gi|110625587|emb|CT009745.25|	2531	0	Zebrafish DNA sequence from clone DKEY-266M15 in linkage group 18, complete sequence	Q9IBG7	68.6	3.00E-11	Kielin/chordin-like protein	.	.	.	.	pfam00094	VWD	von Willebrand factor type D domain. Luciferin-2-monooxygenase from Vargula hilgendorfii contains a vwd domain. Its function is unrelated but the similarity is very strong by several methods.	.	GO:0005576|extracellular region;	.	.	.
ENSDARG00000007366	6	5.585651432	7.816309911	3.580732317	1.744619826	1.492089945	1.886186269	2.889239015	1.921308012	2.256666534	1.704163182	2.428309516	1.693517475	2.247886125	2.766072868	1.359227143	AMDHD1	protein_coding	chr7:19137336-19149533:+	gi|33416881|gb|AAH55559.1|	2344	0	LOC402826 protein [Danio rerio]	gi|357394862|ref|NM_001166353.2|	1695	0	Danio rerio amidohydrolase domain containing 1 (amdhd1), mRNA	Q7SXK5	127	6.00E-33	Probable imidazolonepropionase	BH1984	256	2.00E-77	COG1228	pfam13147	Amidohydro_4	Amidohydrolase. This family of enzymes are a part of a large metal dependent hydrolase superfamily. The family includes Adenine deaminase EC:3.5.4.2 that hydrolyses adenine to form hypoxanthine and ammonia. Adenine deaminases reaction is important for adenine utilisation as a purine and also as a nitrogen source. This family also includes dihydroorotase and N-acetylglucosamine-6-phosphate deacety…	GO:0019556|histidine catabolic process to glutamate and formamide;GO:0019557|histidine catabolic process to glutamate and formate;	GO:0005737|cytoplasm;	GO:0050480|imidazolonepropionase activity;GO:0046872|metal ion binding;	K01468	hutI, AMDHD1; imidazolonepropionase [EC:3.5.2.7]
ENSDARG00000007086	4	3.435717432	5.941889861	4.736989542	3.532207439	1.859854272	3.770609417	1.209285377	0.534596332	0.303275539	1.813420281	0.719585876	0.588241421	0.73200071	1.21515306	0.662585982	aqp10a	protein_coding	chr16:22373353-22378875:-	gi|257786249|gb|ACV66838.1|	1589	0	aquaporin-10a [Danio rerio]	gi|50539765|ref|NM_001002349.1|	1413	0	Danio rerio aquaporin 10a (aqp10a), mRNA	Q96PS8	271	4.00E-85	Aquaporin-10	YPO0091	155	8.00E-42	COG0580	pfam00230	MIP	Major intrinsic protein. MIP (Major Intrinsic Protein) family proteins exhibit essentially two distinct types of channel properties: (1) specific water transport by the aquaporins, and (2) small neutral solutes transport, such as glycerol by the glycerol facilitators.	GO:0034219|carbohydrate transmembrane transport;GO:0009992|cellular water homeostasis;GO:0034220|ion transmembrane transport;GO:0009636|response to toxic substance;GO:0071918|urea transmembrane transport;GO:0006833|water transport;	GO:0005887|integral component of plasma membrane;GO:0005886|plasma membrane;	GO:0015254|glycerol channel activity;GO:0015265|urea channel activity;GO:0015204|urea transmembrane transporter activity;GO:0015250|water channel activity;	K09878	AQP10; aquaporin-10
ENSDARG00000071004	1	7.104007369	6.82898974	7.691681289	4.529538513	3.99583384	5.085216871	8.479470418	7.832031653	9.38412832	9.786474095	11.40253623	12.79320089	9.355833527	11.19860685	7.349933409	abhd12	protein_coding	chr17:21135283-21180076:-	gi|115497554|ref|NP_001070065.1|	1902	0	monoacylglycerol lipase ABHD12 [Danio rerio]	gi|25955879|emb|AL929290.5|	3835	0	Zebrafish DNA sequence from clone CH211-67N1 in linkage group 17, complete sequence	Q08C93	279	1.00E-89	Monoacylglycerol lipase ABHD12	Rv2307c	95.9	4.00E-20	COG1073	pfam12695	Abhydrolase_5	Alpha/beta hydrolase family. This family contains a diverse range of alpha/beta hydrolase enzymes.	GO:0046464|acylglycerol catabolic process;	GO:0016021|integral component of membrane;	GO:0047372|acylglycerol lipase activity;	K13704	ABHD12; abhydrolase domain-containing protein 12 [EC:3.1.1.23]
ENSDARG00000074217	1	13.68270806	5.038092891	17.79995333	6.315443152	11.69755268	14.08982661	41.82853024	53.28364803	129.7972606	33.20935872	13.10470664	25.4133348	12.38503272	24.59686996	18.51836848	si:dkey-188i13.6	protein_coding	chr13:37483568-37489139:-	.	.	.	.	gi|40067401|emb|BX005106.5|	601	0	Zebrafish DNA sequence from clone DKEY-188I13 in linkage group 13, complete sequence	.	.	.	.	.	.	.	.	pfam01500	Keratin_B2	Keratin, high sulfur B2 protein. High sulfur proteins are cysteine-rich proteins synthesized during the differentiation of hair matrix cells, and form hair fibres in association with hair keratin intermediate filaments. This family has been divided up into four regions, with the second region containing 8 copies of a short repeat. This family is also known as B2 or KAP1.	.	.	.	.	.
ENSDARG00000074210	4	0.726138294	0.917335373	0.531867277	0.160240334	0.354606263	0.539579664	4.694042015	1.114736269	1.660018194	0.663945973	3.077897604	0.949432951	0.234824985	0.124033542	2.153536205	zgc:110286	protein_coding	chr11:42183926-42202895:+	gi|688578296|ref|XP_009304579.1|	1096	5.00E-148	PREDICTED: uncharacterized protein LOC550265 [Danio rerio]	gi|62955180|ref|NM_001017602.1|	784	0	Danio rerio zgc:110286 (zgc:110286), mRNA	Q3SZF2	280	1.00E-91	ADP-ribosylation factor 4	.	.	.	.	pfam00025	Arf	ADP-ribosylation factor family. Pfam combines a number of different Prosite families together	GO:0031584|activation of phospholipase D activity;GO:0045176|apical protein localization;GO:0016477|cell migration;GO:0060996|dendritic spine development;GO:0045197|establishment or maintenance of epithelial cell apical/basal polarity;GO:0007612|learning;GO:0043066|negative regulation of apoptotic process;GO:0045944|positive regulation of transcription from RNA polymerase II promoter;GO:0006471|p…	GO:0005829|cytosol;GO:0043197|dendritic spine;GO:0070062|extracellular exosome;GO:0005794|Golgi apparatus;GO:0032587|ruffle membrane;	GO:0005525|GTP binding;	K07939	ARF4; ADP-ribosylation factor 4
ENSDARG00000074212	1	24.74129087	25.2572433	25.46876612	3.803808186	6.353585615	12.16309268	8.542060644	7.194513186	5.330751527	15.65214985	11.62088798	5.4739427	4.517112779	8.799135517	4.67941014	SLC5A10	protein_coding	chr1:7426451-7479056:+	gi|688531448|ref|XP_009304441.1|	2933	0	PREDICTED: sodium/glucose cotransporter 5 [Danio rerio]	gi|530591181|ref|XM_005289186.1|	393	0	PREDICTED: Chrysemys picta bellii solute carrier family 5 (sodium/sugar cotransporter), member 10 (SLC5A10), mRNA	Q5SWY8	756	0	Sodium/glucose cotransporter 5	BH2222	136	3.00E-33	COG4146	pfam00474	SSF	Sodium:solute symporter family. Membership of this family is supported by a significant blast score.	GO:0006814|sodium ion transport;	GO:0070062|extracellular exosome;GO:0005887|integral component of plasma membrane;	GO:0015293|symporter activity;	K14390	SLC5A10, SGLT5; solute carrier family 5 (sodium/glucose cotransporter), member 10
ENSDARG00000051888	5	27.22141364	22.39814867	23.78517921	100.1702259	145.1494177	135.7885667	43.82381151	50.85087135	41.99536242	34.70585141	36.13155329	36.13772555	33.93547823	30.51817704	25.73395317	ist1	protein_coding	chr7:56171157-56183387:+	gi|47086861|ref|NP_997750.1|	1513	0	IST1 homolog [Danio rerio]	gi|47086860|ref|NM_212585.1|	2278	0	Danio rerio increased sodium tolerance 1 homolog (yeast) (ist1), mRNA	P53990	232	8.00E-73	IST1 homolog	.	.	.	.	pfam03398	Ist1	Regulator of Vps4 activity in the MVB pathway. ESCRT-I, -II, and -III are endosomal sorting complexes required for transporting proteins and carry out cargo sorting and vesicle formation in the multivesicular bodies, MVBs, pathway. These complexes are transiently recruited from the cytoplasm to the endosomal membrane where they bind transmembrane proteins previously marked for degradation by mono…	GO:0009838|abscission;GO:0051301|cell division;GO:0000910|cytokinesis;GO:0045184|establishment of protein localization;GO:0036258|multivesicular body assembly;GO:0048672|positive regulation of collateral sprouting;GO:0045862|positive regulation of proteolysis;GO:0008104|protein localization;GO:0015031|protein transport;GO:0046745|viral capsid secondary envelopment;GO:0019076|viral release from ho…	GO:0005913|cell-cell adherens junction;GO:0005813|centrosome;GO:0016023|cytoplasmic membrane-bounded vesicle;GO:0005829|cytosol;GO:0005793|endoplasmic reticulum-Golgi intermediate compartment;GO:0070062|extracellular exosome;GO:0090543|Flemming body;GO:0030496|midbody;GO:0005635|nuclear envelope;	GO:0098641|cadherin binding involved in cell-cell adhesion;GO:0090541|MIT domain binding;GO:0032403|protein complex binding;GO:0019904|protein domain specific binding;	K19476	IST1; vacuolar protein sorting-associated protein IST1
ENSDARG00000062182	4	4.038699806	13.32944831	2.297620336	0.138444859	0.408498183	0.645490295	2.178612293	0.926069932	1.581327005	1.070790487	3.656468671	0.427979238	0.47339763	1.000186326	0.270635315	slc22a7b.3	protein_coding	chr17:21962781-21973871:-	gi|156230356|gb|AAI52008.1|	2772	0	LOC100001772 protein [Danio rerio]	gi|156230355|gb|BC152007.1|	1747	0	Danio rerio hypothetical protein LOC100001772, mRNA (cDNA clone IMAGE:7905258), partial cds	A6QLW8	422	1.00E-138	Solute carrier family 22 member 7	.	.	.	.	pfam07690	MFS_1	Major Facilitator Superfamily.	.	GO:0016323|basolateral plasma membrane;GO:0005887|integral component of plasma membrane;	GO:0008514|organic anion transmembrane transporter activity;	K08204	SLC22A7, OAT2; MFS transporter, OCT family, solute carrier family 22 (organic anion transporter), member 7
ENSDARG00000062187	6	5.149742935	5.080972587	5.453945949	3.634138399	5.084264606	1.926153535	1.98611639	2.220710109	2.434044932	4.412987509	4.331107948	4.659344232	2.952844495	4.790444775	4.278872394	kif14	protein_coding	chr22:22412915-22451238:+	gi|528516018|ref|XP_005170522.1|	7645	0	PREDICTED: kinesin-like protein KIF14 isoform X1 [Danio rerio]	gi|113678898|ref|NM_001044976.1|	4352	0	Danio rerio kinesin family member 14 (kif14), mRNA	Q15058	1256	0	Kinesin-like protein KIF14	SPAC1834.07	211	2.00E-56	COG5059	pfam00225	Kinesin	Kinesin motor domain.	GO:0032147|activation of protein kinase activity;GO:0051301|cell division;GO:0021846|cell proliferation in forebrain;GO:0021695|cerebellar cortex development;GO:0021685|cerebellar granular layer structural organization;GO:0021693|cerebellar Purkinje cell layer structural organization;GO:0021987|cerebral cortex development;GO:0030705|cytoskeleton-dependent intracellular transport;GO:0045184|establ…	GO:0005829|cytosol;GO:0005871|kinesin complex;GO:0016020|membrane;GO:0005874|microtubule;GO:0030496|midbody;GO:0005634|nucleus;GO:0051233|spindle midzone;	GO:0005524|ATP binding;GO:0008574|ATP-dependent microtubule motor activity, plus-end-directed;GO:0016887|ATPase activity;GO:0008017|microtubule binding;GO:0003777|microtubule motor activity;GO:0030165|PDZ domain binding;GO:0019901|protein kinase binding;GO:0015631|tubulin binding;	K17915	KIF14; kinesin family member 14
ENSDARG00000013453	2	7.361140852	0.102251168	12.12656609	0.19647381	2.732963688	0.029080843	0.054360867	0.060079119	0	3.768014233	0.134781089	0.086766583	0.932323744	0.564868395	1.083630844	tdrd9	protein_coding	chr13:31271617-31292896:+	gi|290463321|sp|B8A4F4.1|TDRD9_DANRE	7012	0	RecName: Full=Putative ATP-dependent RNA helicase TDRD9; AltName: Full=Tudor domain-containing protein 9	gi|194473663|ref|NM_001130512.1|	4312	0	Danio rerio tudor domain containing 9 (tdrd9), mRNA	B8A4F4	2704	0	Putative ATP-dependent RNA helicase TDRD9	.	.	.	.	pfam04408	HA2	Helicase associated domain (HA2). This presumed domain is about 90 amino acid residues in length. It is found is a diverse set of RNA helicases. Its function is unknown, however it seems likely to be involved in nucleic acid binding.	GO:0030154|cell differentiation;GO:0043046|DNA methylation involved in gamete generation;GO:0009566|fertilization;GO:0031047|gene silencing by RNA;GO:0007140|male meiosis;GO:0007275|multicellular organismal development;GO:0034587|piRNA metabolic process;GO:0006396|RNA processing;GO:0007283|spermatogenesis;	GO:0005634|nucleus;GO:0043186|P granule;GO:0071547|piP-body;	GO:0005524|ATP binding;GO:0004004|ATP-dependent RNA helicase activity;GO:0044822|poly(A) RNA binding;	K18408	TDRD9; ATP-dependent RNA helicase TDRD9 [EC:3.6.4.13]
ENSDARG00000037056	3	1.072610729	1.032408627	3.042813569	2.614949639	1.197267354	1.074393919	1.091503406	0.627286037	2.155679735	0.398524434	0.173199908	0	0	0.697963374	0.572870323	zte38	protein_coding	chr2:6180176-6192153:-	gi|89886291|ref|NP_001034898.1|	1619	0	zebrafish testis-expressed 38 [Danio rerio]	gi|89886290|ref|NM_001039809.1|	1384	0	Danio rerio zebrafish testis-expressed 38 (zte38), mRNA	D3ZWE7	264	1.00E-81	HORMA domain-containing protein 1	.	.	.	.	pfam02301	HORMA	HORMA domain. The HORMA (for Hop1p, Rev7p and MAD2) domain has been suggested to recognize chromatin states that result from DNA adducts, double stranded breaks or non-attachment to the spindle and acts as an adaptor that recruits other proteins. MAD2 is a spindle checkpoint protein which prevents progression of the cell cycle upon detection of a defect in mitotic spindle integrity.	GO:0001824|blastocyst development;GO:0042138|meiotic DNA double-strand break formation;GO:0007126|meiotic nuclear division;GO:0051598|meiotic recombination checkpoint;GO:0051177|meiotic sister chromatid cohesion;GO:0048477|oogenesis;GO:0060629|regulation of homologous chromosome segregation;GO:0007283|spermatogenesis;GO:0007130|synaptonemal complex assembly;	GO:0005694|chromosome;GO:0005737|cytoplasm;GO:0005634|nucleus;GO:0000795|synaptonemal complex;	.	.	.
ENSDARG00000015678	6	2.455692134	2.223513871	3.371469458	1.476505877	1.050529566	1.36705813	1.612363441	2.252677685	2.903975608	2.915722838	3.771374533	3.593229145	2.455322313	3.793405089	3.746060517	si:dkeyp-75b4.9	protein_coding	chr1:9300129-9305551:-	gi|528467455|ref|XP_002660417.2|	1525	0	PREDICTED: interferon-induced protein 44 [Danio rerio]	gi|46200444|emb|BX548256.7|	1245	0	Zebrafish DNA sequence from clone DKEYP-75B4 in linkage group 1, complete sequence	Q8TCB0	131	2.00E-34	Interferon-induced protein 44	.	.	.	.	pfam13476	AAA_23	AAA domain.	GO:0009615|response to virus;	GO:0005737|cytoplasm;	.	.	.
ENSDARG00000040479	3	0.534411631	0.876786747	0.596472624	0.438029855	0.331399921	0.174554373	0.065258954	0.108185373	0	0.037229739	0.064720622	0.06944084	0.131674462	0.173874704	0.164667541	cga	protein_coding	chr17:49356244-49365356:-	gi|51339029|ref|NP_991250.1|	629	8.00E-76	glycoprotein hormones alpha chain precursor [Danio rerio]	gi|99028932|ref|NM_205687.2|	1708	0	Danio rerio glycoprotein hormones, alpha polypeptide (cga), mRNA	P37037	202	1.00E-60	Glycoprotein hormones alpha chain	.	.	.	.	pfam00236	Hormone_6	Glycoprotein hormone.	.	GO:0005576|extracellular region;	.	.	.
ENSDARG00000040474	1	3.183781053	4.2252279	5.653314829	5.790961269	5.667722411	6.352937954	6.680000844	7.109241749	7.389634648	10.91514143	23.06445437	14.45014	7.404793571	22.06081273	6.659005463	snx10b	protein_coding	chr16:21227814-21232196:-	gi|160333640|ref|NP_001103866.1|	851	2.00E-106	sorting nexin-10B [Danio rerio]	gi|160333639|ref|NM_001110396.1|	2241	0	Danio rerio sorting nexin 10b (snx10b), mRNA	A8WG21	332	9.00E-108	Sorting nexin-10B	YOR357c	49.3	5.00E-06	COG5391	pfam00787	PX	PX domain. PX domains bind to phosphoinositides.	GO:0006897|endocytosis;GO:0015031|protein transport;GO:0016050|vesicle organization;	GO:0005768|endosome;GO:0010008|endosome membrane;GO:0019898|extrinsic component of membrane;	GO:0035091|phosphatidylinositol binding;	K17924	SNX10_11; sorting nexin-10/11
ENSDARG00000063580	6	7.093427723	6.563221917	6.650434924	6.61494218	5.72359437	11.2651361	5.57835591	6.448963988	6.809345306	6.153201566	6.805767632	5.328579393	3.353643035	3.451529642	4.161550707	si:ch1073-219n12.1	protein_coding	chr9:3049547-3119000:+	gi|528489138|ref|XP_700731.6|	4823	0	PREDICTED: neurabin-1 isoform X1 [Danio rerio]	gi|110162181|emb|BX957292.10|	1783	0	Zebrafish DNA sequence from clone CH211-173M16 in linkage group 9, complete sequence	O35867	345	5.00E-108	Neurabin-1	.	.	.	.	pfam00595	PDZ	PDZ domain (Also known as DHR or GLGF). PDZ domains are found in diverse signaling proteins.	GO:0007015|actin filament organization;GO:0007568|aging;GO:0019722|calcium-mediated signaling;GO:0097237|cellular response to toxic substance;GO:0060079|excitatory postsynaptic potential;GO:1900272|negative regulation of long-term synaptic potentiation;GO:1904049|negative regulation of spontaneous neurotransmitter secretion;GO:0051497|negative regulation of stress fiber assembly;GO:0031175|neuron…	GO:0015629|actin cytoskeleton;GO:0030054|cell junction;GO:0030864|cortical actin cytoskeleton;GO:0005737|cytoplasm;GO:0005829|cytosol;GO:0030425|dendrite;GO:0044326|dendritic spine neck;GO:0030175|filopodium;GO:1990761|growth cone lamellipodium;GO:0031594|neuromuscular junction;GO:0043025|neuronal cell body;GO:0014069|postsynaptic density;	GO:0051015|actin filament binding;	K17551	PPP1R9; neurabin
ENSDARG00000097718	1	38.62910495	44.36400654	26.60506491	28.37247409	10.51147525	26.23286905	25.13461651	15.52330279	43.66477806	25.30430892	21.50588614	9.832822999	14.0459782	15.75722114	18.15611134	stard10	protein_coding	chr15:47207134-47207633:+	gi|45387705|ref|NP_991209.1|	290	9.00E-29	PCTP-like protein [Danio rerio]	gi|189026923|emb|CU655829.8|	500	0	Zebrafish DNA sequence from clone CH1073-133P4 in linkage group 15, complete sequence	Q9JMD3	68.2	6.00E-13	PCTP-like protein	.	.	.	.	pfam02634	FdhD-NarQ	FdhD/NarQ family. A pan-bacterial lineage of proteins. Nitrate assimilation protein, NarQ, and FdhD are required for formate dehydrogenase activity. Structurally, they possess a deaminase fold with a characteristic binding pocket, suggesting that they might bind a nucleotide or related molecule allosterically to regulate the formate dehydrogenase catalytic subunit.	GO:0032782|bile acid secretion;GO:0015914|phospholipid transport;GO:0035360|positive regulation of peroxisome proliferator activated receptor signaling pathway;	GO:0005829|cytosol;GO:0046581|intercellular canaliculus;GO:0016020|membrane;GO:0005902|microvillus;GO:0031514|motile cilium;	GO:0008289|lipid binding;GO:0005215|transporter activity;	.	.
ENSDARG00000105033	6	2.107555232	2.904533073	3.266379645	1.253704892	0.994410442	1.131352031	6.227023461	3.722365466	7.992505811	7.462420691	11.8075431	6.042633333	3.634985274	6.719942264	4.071444209	BX897691.1	protein_coding	chr1:34378978-34382152:-	gi|688533196|ref|XP_009296922.1|	1409	0	PREDICTED: B- and T-lymphocyte attenuator-like isoform X3 [Danio rerio]	gi|99648211|emb|BX897691.14|	793	0	Zebrafish DNA sequence from clone DKEY-168E3 in linkage group 1, complete sequence	Q7TSA3	55.8	4.00E-07	B- and T-lymphocyte attenuator	.	.	.	.	pfam07679	I-set	Immunoglobulin I-set domain.	GO:0002250|adaptive immune response;GO:0007166|cell surface receptor signaling pathway;GO:0002768|immune response-regulating cell surface receptor signaling pathway;GO:0046642|negative regulation of alpha-beta T cell proliferation;GO:0030889|negative regulation of B cell proliferation;GO:0042130|negative regulation of T cell proliferation;GO:0031295|T cell costimulation;	GO:0009897|external side of plasma membrane;GO:0005887|integral component of plasma membrane;GO:0005886|plasma membrane;	GO:0004872|receptor activity;	K06707	BTLA; B- and T-lymphocyte attenuator
ENSDARG00000059558	3	0.114149696	0.172298168	0.207034507	0.662135759	0.856518261	0.872459844	0.062726561	0.184866147	0.076470795	0.254471309	0.062209119	0.126076095	0.189847193	0.185697161	0.147725731	tecta	protein_coding	chr5:62482854-62543523:-	gi|688557606|ref|XP_009300199.1|	11545	0	PREDICTED: alpha-tectorin isoform X1 [Danio rerio]	gi|597787231|ref|XM_007256999.1|	1485	0	PREDICTED: Astyanax mexicanus alpha-tectorin-like (LOC103031547), mRNA	O08523	203	9.00E-52	Alpha-tectorin	.	.	.	.	pfam00100	Zona_pellucida	Zona pellucida-like domain.	GO:0007160|cell-matrix adhesion;GO:0007605|sensory perception of sound;	GO:0031225|anchored component of membrane;GO:0070062|extracellular exosome;GO:0005886|plasma membrane;GO:0005578|proteinaceous extracellular matrix;	GO:0005201|extracellular matrix structural constituent;	K18273	TECTA; alpha-tectorin
ENSDARG00000088810	4	0.8070462	0.519042045	0.532016176	1.193234226	1.436338469	1.457734258	0.534641103	0.705244253	0.662300882	1.023254995	0.906523565	0.954286667	1.287549162	0.569794997	0.818137678	prox1b	protein_coding	chr7:19678596-19688505:-	gi|284172381|ref|NP_001165058.1|	2929	0	prospero homeobox 1b [Danio rerio]	gi|284172380|ref|NM_001171587.1|	3558	0	Danio rerio prospero homeobox 1b (prox1b), mRNA	Q92786	249	2.00E-68	Prospero homeobox protein 1	.	.	.	.	pfam05044	HPD	Homeo-prospero domain. Prospero is a large drosophila transcription factor protein that is expressed in all neural lineages of drosophila embryos. It is needed for correct expression of several neural proteins and in determining the cell fates of neural stem cells. Homologues of prospero are found in a wide range of animals including humans with the highest level of similarity being found in the …	GO:0090425|acinar cell differentiation;GO:0060414|aorta smooth muscle tissue morphogenesis;GO:0055009|atrial cardiac muscle tissue morphogenesis;GO:0007420|brain development;GO:0061114|branching involved in pancreas morphogenesis;GO:0055007|cardiac muscle cell differentiation;GO:0001709|cell fate determination;GO:0021707|cerebellar granule cell differentiation;GO:0007623|circadian rhythm;GO:00215…	GO:0005737|cytoplasm;GO:0005634|nucleus;	GO:0001046|core promoter sequence-specific DNA binding;GO:0050692|DBD domain binding;GO:0003677|DNA binding;GO:0050693|LBD domain binding;GO:0016922|ligand-dependent nuclear receptor binding;GO:0003714|transcription corepressor activity;GO:0003705|transcription factor activity, RNA polymerase II distal enhancer sequence-specific binding;GO:0003700|transcription factor activity, sequence-specific …	.	.
ENSDARG00000088813	4	0.236701	0.228919395	0.279831755	2.496231409	3.363654774	2.574944039	0.170383965	0.305998478	0.292102574	0.643968296	0.718158373	0.61189564	0.687575133	0.351825018	0.365439544	ppp1r3ab	protein_coding	chr25:21689625-21698382:-	gi|528521702|ref|XP_001341298.3|	5510	0	PREDICTED: protein phosphatase 1 regulatory subunit 3A [Danio rerio]	gi|60495530|emb|CR450696.6|	4299	0	Zebrafish DNA sequence from clone CH211-147K9 in linkage group 25, complete sequence	Q16821	185	7.00E-46	Protein phosphatase 1 regulatory subunit 3A	.	.	.	.	pfam03370	CBM_21	Putative phosphatase regulatory subunit. This family consists of several eukaryotic proteins that are thought to be involved in the regulation of glycogen metabolizm. For instance, the mouse PTG protein has been shown to interact with glycogen synthase, phosphorylase kinase, phosphorylase a: these three enzymes have key roles in the regulation of glycogen metabolizm. PTG also binds the catalytic …	GO:0005977|glycogen metabolic process;	GO:0016021|integral component of membrane;	.	K07189	PPP1R3; protein phosphatase 1 regulatory subunit 3A/B/C/D/E
ENSDARG00000036189	6	5.59408304	4.538927005	7.166089447	4.809633022	3.784373288	2.192628157	7.576354004	5.353431035	7.01817659	8.431935375	5.85095303	6.674160772	13.90864599	8.273070575	11.09434278	spata4	protein_coding	chr14:36053540-36057562:-	gi|51591893|ref|NP_001004013.1|	1204	3.00E-164	spermatogenesis-associated protein 4 [Danio rerio]	gi|62205289|gb|BC093102.1|	986	0	Danio rerio spermatogenesis associated 4, mRNA (cDNA clone MGC:111786 IMAGE:7409401), complete cds	Q6DMN8	221	8.00E-68	Spermatogenesis-associated protein 4	.	.	.	.	pfam06294	DUF1042	Domain of Unknown Function (DUF1042). Spef is a region of sperm flagellar proteins. It probably exerts a role in spermatogenesis in that the protein is expressed predominantly in adult tissue. It is present in the tails of developing and epididymal sperm internal to the fibrous sheath and around the dense outer fibres of the sperm flagellum. The amino-terminal domain (residues 1-110) shows a poss…	.	GO:0005737|cytoplasm;	.	.	.
ENSDARG00000036180	1	114.2946191	5.217172022	137.4735121	5.163099259	55.34033141	2.616164689	2.262722771	3.993116988	2.32249234	84.78076118	3.474669238	3.844587192	22.75409588	16.64714319	26.37427717	ccnb2	protein_coding	chr7:30355228-30359969:+	gi|40786525|ref|NP_955462.1|	2059	0	G2/mitotic-specific cyclin-B2 [Danio rerio]	gi|42542461|gb|BC066507.1|	1471	0	Danio rerio cyclin B2, mRNA (cDNA clone MGC:77013 IMAGE:6805747), complete cds	Q60FX9	432	3.00E-148	G2/mitotic-specific cyclin-B2	SPBC582.03	177	1.00E-49	COG5024	pfam00134	Cyclin_N	Cyclin, N-terminal domain. Cyclins regulate cyclin dependent kinases (CDKs). Human cyclin-O is a Uracil-DNA glycosylase that is related to other cyclins. Cyclins contain two domains of similar all-alpha fold, of which this family corresponds with the N-terminal domain.	GO:0051301|cell division;GO:0007067|mitotic nuclear division;	GO:0005634|nucleus;	.	.	.
ENSDARG00000003910	6	8.526931122	7.925275845	8.028533441	6.262986664	7.566981419	11.93229618	4.156222414	6.932658548	9.010649125	7.859735577	8.030144095	8.43562193	4.138697456	3.601022447	5.088317541	med13b	protein_coding	chr15:20124911-20189599:-	gi|139948785|ref|NP_001077307.1|	9914	0	mediator of RNA polymerase II transcription subunit 13-like [Danio rerio]	gi|139948784|ref|NM_001083838.1|	7514	0	Danio rerio mediator complex subunit 13b (med13b), mRNA	A2VCZ5	193	3.00E-55	Mediator of RNA polymerase II transcription subunit 13-like	.	.	.	.	pfam06333	Med13_C	Mediator complex subunit 13 C-terminal. Mediator is a large complex of up to 33 proteins that is conserved from plants through fungi to humans - the number and representation of individual subunits varying with species. It is arranged into four different sections, a core, a head, a tail and a kinase-activity part, and the number of subunits within each of these is what varies with species. Overal…	GO:0006351|transcription, DNA-templated;	GO:0016592|mediator complex;	GO:0001104|RNA polymerase II transcription cofactor activity;	K15164	MED13; mediator of RNA polymerase II transcription subunit 13
ENSDARG00000078069	4	2.600283665	6.16268564	2.885763412	0.991138042	1.616155481	0.351313041	0.858774652	0.725789748	0.581977552	1.700325983	0.951889366	1.075066065	1.605359492	1.965076437	1.861020023	rrm2	protein_coding	chr19:48003903-48010821:-	gi|18859327|ref|NP_571525.1|	1999	0	ribonucleoside-diphosphate reductase subunit M2 [Danio rerio]	gi|40254703|ref|NM_131450.2|	2031	0	Danio rerio ribonucleotide reductase M2 polypeptide (rrm2), mRNA	P79733	326	1.00E-108	Ribonucleoside-diphosphate reductase subunit M2	YJL026w	452	4.00E-152	COG0208	pfam00268	Ribonuc_red_sm	Ribonucleotide reductase, small chain.	GO:0009186|deoxyribonucleoside diphosphate metabolic process;GO:0009263|deoxyribonucleotide biosynthetic process;GO:0006260|DNA replication;	GO:0005971|ribonucleoside-diphosphate reductase complex;	GO:0046872|metal ion binding;GO:0004748|ribonucleoside-diphosphate reductase activity, thioredoxin disulfide as acceptor;	K10808	RRM2; ribonucleoside-diphosphate reductase subunit M2 [EC:1.17.4.1]
ENSDARG00000100941	6	6.082994319	5.545200635	10.04819395	7.760535023	11.55234119	8.801269755	8.774521386	7.25069094	11.43256539	5.005798005	6.103583591	3.976787409	6.80313712	6.320898688	7.257229173	clca5.2	protein_coding	chr15:14229519-14237171:+	gi|688587280|ref|XP_009289819.1|	4513	0	PREDICTED: epithelial chloride channel protein-like [Danio rerio]	gi|126215283|emb|CR925813.10|	627	0	Zebrafish DNA sequence from clone DKEY-243K1 in linkage group 15, complete sequence	P54281	609	0	Epithelial chloride channel protein	.	.	.	.	pfam08434	CLCA_N	Calcium-activated chloride channel. The CLCA family of calcium-activated chloride channels has been identified in many epithelial and endothelial cell types as well as in smooth muscle cells and has four or five putative transmembrane regions. Additionally to their role as chloride channels some CLCA proteins function as adhesion molecules and may also have roles as tumor suppressors. The domain …	.	GO:0034707|chloride channel complex;	GO:0005262|calcium channel activity;GO:0005229|intracellular calcium activated chloride channel activity;GO:0005244|voltage-gated ion channel activity;	K05030	CLCA4; calcium-activated chloride channel regulator 4
ENSDARG00000104964	4	0.513313573	0.660262886	0.55143979	0.453101231	0.08912864	0.140837033	0.833678485	0.242466743	0.673999644	1.201534137	2.175793	1.307307901	0.486932911	1.543175147	2.258619401	znf1093	protein_coding	chr4:37854536-37859835:-	gi|688549490|ref|XP_009298860.1|	1396	0	PREDICTED: gastrula zinc finger protein XlCGF57.1-like [Danio rerio]	gi|54261094|emb|CR381657.7|	1165	0	Zebrafish DNA sequence from clone CH211-229L10 in linkage group 4, complete sequence	P18729	358	6.00E-119	Gastrula zinc finger protein XlCGF57.1 (Fragment)	SPAC144.09c	125	3.00E-31	COG5048	pfam13465	zf-H2C2_2	Zinc-finger double domain.	GO:0006355|regulation of transcription, DNA-templated;GO:0006351|transcription, DNA-templated;	GO:0005634|nucleus;	GO:0003677|DNA binding;GO:0046872|metal ion binding;	.	.
ENSDARG00000101807	4	1.780272006	1.139118866	0.776177433	1.571443809	1.048784998	1.657242471	1.385896367	1.741910172	1.222449918	0.558101211	0.053900545	0.49156886	1.315931456	0.868836631	0.054855283	si:ch211-120c15.3	protein_coding	chr4:67567117-67588945:-	gi|528477778|ref|XP_005166812.1|	1732	0	PREDICTED: gastrula zinc finger protein XlCGF8.2DB-like [Danio rerio]	gi|46878992|emb|BX005326.16|	2030	0	Zebrafish DNA sequence from clone CH211-120C15 in linkage group 4, complete sequence	P51814	127	4.00E-29	Zinc finger protein 41	.	.	.	.	pfam13465	zf-H2C2_2	Zinc-finger double domain.	GO:0006355|regulation of transcription, DNA-templated;GO:0006351|transcription, DNA-templated;	GO:0005634|nucleus;	GO:0003677|DNA binding;GO:0046872|metal ion binding;GO:0003700|transcription factor activity, sequence-specific DNA binding;	K09228	KRAB; KRAB domain-containing zinc finger protein
ENSDARG00000060345	4	3.210586841	0.543381648	0.660105694	0.671205996	2.127175669	0.386352469	0.144441858	0.159635783	0.237722869	0.576820901	0.286500668	0.922187386	0.655748082	0.769696226	1.384983361	apoda.1	protein_coding	chr2:37225342-37227940:-	gi|614458165|ref|NP_001070050.2|	928	8.00E-124	apolipoprotein D-like precursor [Danio rerio]	gi|614458164|ref|NM_001076582.2|	845	0	Danio rerio apolipoprotein Da, duplicate 1 (apoda.1), mRNA	P51909	182	9.00E-55	Apolipoprotein D	VCA0406	60.5	2.00E-10	COG3040	pfam08212	Lipocalin_2	Lipocalin-like domain. Lipocalins are transporters for small hydrophobic molecules, such as lipids, steroid hormones, bilins, and retinoids. The structure is an eight-stranded beta barrel.	GO:0007568|aging;GO:0007420|brain development;GO:0006006|glucose metabolic process;GO:0006629|lipid metabolic process;GO:1900016|negative regulation of cytokine production involved in inflammatory response;GO:0051895|negative regulation of focal adhesion assembly;GO:0060588|negative regulation of lipoprotein lipid oxidation;GO:0071638|negative regulation of monocyte chemotactic protein-1 producti…	GO:0022626|cytosolic ribosome;GO:0030425|dendrite;GO:0005783|endoplasmic reticulum;GO:0070062|extracellular exosome;GO:0005615|extracellular space;GO:0043025|neuronal cell body;GO:0048471|perinuclear region of cytoplasm;	GO:0015485|cholesterol binding;GO:0005215|transporter activity;	.	.
ENSDARG00000060340	6	4.056528053	1.899807167	3.177045156	5.603550613	5.008208627	7.251254062	1.913881009	2.264511763	3.433977508	3.840759201	3.461228601	3.557929375	2.044419278	1.079853422	2.181700474	si:dkey-157l19.2	protein_coding	chr13:35864445-35908807:-	gi|528498553|ref|XP_689554.6|	2983	0	PREDICTED: uncharacterized protein KIAA1522 [Danio rerio]	gi|51870475|emb|BX510990.32|	4579	0	Zebrafish DNA sequence from clone CH211-67F13 in linkage group 13, complete sequence	Q1LWM5	123	1.00E-26	Uncharacterized protein KIAA1522 homolog	.	.	.	.	pfam06346	Drf_FH1	Formin Homology Region 1. This region is found in some of the Diaphanous related formins (Drfs). It consists of low complexity repeats of around 12 residues.	GO:0008033|tRNA processing;	.	GO:0016740|transferase activity;	.	.
ENSDARG00000087303	5	13.72747155	15.5552546	24.8577599	218.3119403	155.4772723	182.1465463	15.9389297	39.12166257	54.28860804	24.71298247	27.15389664	42.29674655	29.00349482	31.4206493	32.66836733	cebpd	protein_coding	chr24:35676571-35677830:+	gi|68085441|gb|AAH56512.2|	1351	0	CCAAT/enhancer binding protein (C/EBP), delta [Danio rerio]	gi|33991784|gb|BC056512.1|	1260	0	Danio rerio CCAAT/enhancer binding protein (C/EBP), delta, mRNA (cDNA clone MGC:65750 IMAGE:6788996), complete cds	P49716	215	5.00E-65	CCAAT/enhancer-binding protein delta	.	.	.	.	pfam07716	bZIP_2	Basic region leucine zipper.	GO:0045444|fat cell differentiation;GO:0002244|hematopoietic progenitor cell differentiation;GO:0048839|inner ear development;GO:0045892|negative regulation of transcription, DNA-templated;GO:0045669|positive regulation of osteoblast differentiation;GO:0006366|transcription from RNA polymerase II promoter;	GO:0005634|nucleus;	GO:0000978|RNA polymerase II core promoter proximal region sequence-specific DNA binding;GO:0001077|transcriptional activator activity, RNA polymerase II core promoter proximal region sequence-specific binding;	K10050	CEBPD; CCAAT/enhancer binding protein (C/EBP), delta
ENSDARG00000071475	2	0.208766638	0.219209386	0.189321127	0.236928912	0.233029069	0.150016355	0.038239883	0.014087453	0	0.014543709	0	0.0542538	0.012859579	0.040754245	0.025730794	aox5	protein_coding	chr22:14058680-14090589:-	gi|523704360|ref|NP_001265725.1|	6884	0	xanthine dehydrogenase [Danio rerio]	gi|523704359|ref|NM_001278796.1|	4011	0	Danio rerio aldehyde oxidase 5 (aox5), mRNA	C4NYZ3	62.4	4.00E-31	Aldehyde oxidase 2	SMb21287	496	9.00E-155	COG4631	pfam02738	Ald_Xan_dh_C2	Molybdopterin-binding domain of aldehyde dehydrogenase.	.	GO:0005737|cytoplasm;	GO:0051537|2 iron, 2 sulfur cluster binding;GO:0004031|aldehyde oxidase activity;GO:0009055|electron carrier activity;GO:0050660|flavin adenine dinucleotide binding;GO:0005506|iron ion binding;GO:0051287|NAD binding;GO:0016614|oxidoreductase activity, acting on CH-OH group of donors;	K00157	AOX; aldehyde oxidase [EC:1.2.3.1]
ENSDARG00000074771	6	2.259467615	2.684389262	1.445720673	6.0864476	5.208388635	6.87619683	3.296670687	3.459436848	3.836333107	6.763013494	8.355327384	8.716664713	5.341570281	3.229520549	3.125728165	crfb17	protein_coding	chr1:53182601-53203565:+	gi|308210807|ref|NP_001129451.2|	2024	0	interferon gamma receptor 1 precursor [Danio rerio]	gi|308210806|ref|NM_001135979.2|	1850	0	Danio rerio cytokine receptor family member B17 (crfb17), mRNA	.	.	.	.	.	.	.	.	pfam01108	Tissue_fac	Tissue factor. This family is found in metazoa, and is very similar to the fibronectin type III domain. The family is found in cytokine receptors, interleukin and interferon receptors and coagulation factor III proteins. It occurs multiple times, as does fn3, family pfam00041.	.	.	.	.	.
ENSDARG00000029822	4	8.964226973	0.616796656	0.462797389	10.10875052	4.216932339	0.433392206	0.135023457	12.12466572	0.925925147	0.577723948	0.200864441	0.179594941	0.817319619	1.403040239	1.601308375	cel.2	protein_coding	chr21:11292403-11301351:+	gi|41351074|gb|AAH65887.1|	2898	0	Cel.2 protein [Danio rerio]	gi|49900546|gb|BC076049.1|	1808	0	Danio rerio carboxyl ester lipase, tandem duplicate 2, mRNA (cDNA clone IMAGE:7047730), partial cds	P30122	650	0	Bile salt-activated lipase (Fragment)	BS_pnbA	181	8.00E-49	COG2272	pfam00135	COesterase	Carboxylesterase family.	GO:0016042|lipid catabolic process;GO:0050804|modulation of synaptic transmission;GO:0007158|neuron cell-cell adhesion;GO:0007416|synapse assembly;	GO:0009986|cell surface;GO:0005737|cytoplasm;GO:0005576|extracellular region;GO:0005887|integral component of plasma membrane;GO:0045202|synapse;	GO:0052689|carboxylic ester hydrolase activity;GO:0042043|neurexin family protein binding;GO:0004872|receptor activity;GO:0004771|sterol esterase activity;GO:0004806|triglyceride lipase activity;	.	.
ENSDARG00000070047	5	63.52930982	68.78004086	41.54059171	252.0938917	162.8724507	227.5494255	96.98080307	37.77884172	63.43378493	55.82068399	61.09626743	27.68476813	39.77338894	38.00165372	37.21734086	rgs4	protein_coding	chr6:35378842-35383561:+	gi|159155989|gb|AAI54781.1|	929	7.00E-116	Rgs4 protein [Danio rerio]	gi|40548309|ref|NM_199274.1|	2521	0	Danio rerio regulator of G-protein signaling 4 (rgs4), mRNA	Q7SZC6	83.2	8.00E-17	Regulator of G-protein signaling 4	.	.	.	.	pfam00615	RGS	Regulator of G protein signaling domain. RGS family members are GTPase-activating proteins for heterotrimeric G-protein alpha-subunits.	GO:0009968|negative regulation of signal transduction;	GO:0005737|cytoplasm;GO:0005886|plasma membrane;	GO:0005096|GTPase activator activity;	K16449	RGS; regulator of G-protein signaling
ENSDARG00000070040	6	7.512406308	3.03580585	8.432657519	3.604506519	5.737232123	3.620583855	2.771134529	2.238077104	2.835846005	6.414851477	2.959680775	3.941068042	3.602139433	4.1460393	5.35186602	zgc:162344	protein_coding	chr21:11943610-11981582:+	gi|528513219|ref|XP_005161109.1|	2781	0	PREDICTED: uncharacterized protein KIAA1328 homolog isoform X2 [Danio rerio]	gi|528513218|ref|XM_005161052.1|	1938	0	PREDICTED: Danio rerio zgc:162344 (zgc:162344), transcript variant X2, mRNA	Q6NZK5	118	2.00E-26	Protein hinderin	.	.	.	.	pfam15369	KIAA1328	Uncharacterized protein KIAA1328. This function of this protein family remains uncharacterized. This family of proteins is found in eukaryotes.	GO:0006915|apoptotic process;GO:0007275|multicellular organismal development;	GO:0005737|cytoplasm;GO:0005730|nucleolus;	GO:0004842|ubiquitin-protein transferase activity;GO:0008270|zinc ion binding;	.	.
ENSDARG00000091236	5	67.98126538	93.89722945	176.9944795	225.1932154	254.7423848	114.5147096	440.1612227	166.7788134	367.0729092	128.3230885	126.556554	98.19051538	153.9396176	101.9309036	113.384257	CABZ01058646.1	protein_coding	chr5:4135712-4138111:+	gi|528478340|ref|XP_005168662.1|	543	8.00E-69	PREDICTED: cystatin-B-like [Danio rerio]	.	.	.	.	Q62426	65.9	6.00E-13	Cystatin-B	.	.	.	.	pfam00031	Cystatin	Cystatin domain. Very diverse family. Attempts to define separate sub-families failed. Typically, either the N-terminal or C-terminal end is very divergent. But splitting into two domains would make very short families. pfam00666 are related to this family but have not been included.	GO:0008344|adult locomotory behavior;GO:0010466|negative regulation of peptidase activity;GO:0045861|negative regulation of proteolysis;	GO:0005737|cytoplasm;GO:0070062|extracellular exosome;GO:0005615|extracellular space;GO:0005730|nucleolus;GO:0005634|nucleus;	GO:0004869|cysteine-type endopeptidase inhibitor activity;GO:0004866|endopeptidase inhibitor activity;GO:0044822|poly(A) RNA binding;GO:0002020|protease binding;	K13907	CSTA_B; cystatin-A/B
ENSDARG00000054103	4	1.732923389	1.053632278	0.62220447	1.147236935	2.146084013	1.934467361	1.503078926	1.44451191	2.151106157	2.112669199	1.728324397	2.665663944	3.142680157	2.089447641	2.50648686	ripply1	protein_coding	chr21:37919751-37926113:-	gi|84993744|ref|NP_001034197.1|	613	5.00E-75	protein ripply1 [Danio rerio]	gi|84993743|ref|NM_001039108.1|	899	0	Danio rerio ripply1 (ripply1), mRNA	Q2WG80	89	3.00E-20	Protein ripply1	.	.	.	.	pfam14998	Ripply	Transcription Regulator. The precise function of this family is not clear, but it is thought to play a role in somitogenesis, development and transcriptional repression. Ripply is also known by an alternative name, Bowline. Bowline, is an associate protein of the transcriptional co-repressor XGrg-4. This family contains two conserved sequence motifs: WRPW and FPVQATI. The WRPW motif is thought to…	GO:0009880|embryonic pattern specification;GO:0000122|negative regulation of transcription from RNA polymerase II promoter;GO:0045892|negative regulation of transcription, DNA-templated;GO:0048641|regulation of skeletal muscle tissue development;GO:0032525|somite rostral/caudal axis specification;GO:0001757|somite specification;GO:0001756|somitogenesis;GO:0006351|transcription, DNA-templated;	GO:0005634|nucleus;	.	.	.
ENSDARG00000058389	5	29.23777859	22.04838725	19.13489206	73.13426273	45.49223443	29.44844474	97.17793992	135.7388612	284.5439201	48.51399819	66.05349883	63.2036041	71.1880149	35.28355629	52.61254604	ccl19a.1	protein_coding	chr5:12853649-12892362:+	gi|528478614|ref|XP_005165111.1|	607	8.00E-76	PREDICTED: chemokine (C-C motif) ligand 19a, tandem duplicate 1 isoform X1 [Danio rerio]	gi|528478613|ref|XM_005165054.1|	949	0	PREDICTED: Danio rerio chemokine (C-C motif) ligand 19a, tandem duplicate 1 (ccl19a.1), transcript variant X1, mRNA	O70460	66.6	2.00E-12	C-C motif chemokine 19	.	.	.	.	pfam00048	IL8	Small cytokines (intecrine/chemokine), interleukin-8 like. Includes a number of secreted growth factors and interferons involved in mitogenic, chemotactic, and inflammatory activity. Structure contains two highly conserved disulfide bonds.	GO:0007257|activation of JUN kinase activity;GO:0048469|cell maturation;GO:0071346|cellular response to interferon-gamma;GO:0071347|cellular response to interleukin-1;GO:0071356|cellular response to tumor necrosis factor;GO:0098586|cellular response to virus;GO:0070098|chemokine-mediated signaling pathway;GO:0002407|dendritic cell chemotaxis;GO:0001768|establishment of T cell polarity;GO:0007186|…	GO:0009897|external side of plasma membrane;GO:0005615|extracellular space;GO:0005622|intracellular;	GO:0048020|CCR chemokine receptor binding;GO:0031735|CCR10 chemokine receptor binding;GO:0031732|CCR7 chemokine receptor binding;GO:0008009|chemokine activity;GO:0042379|chemokine receptor binding;	K05512	CCL19, ELC; C-C motif chemokine 19
ENSDARG00000034588	4	1.400934982	0.371637555	0.366130492	0.792471261	1.027816099	0.830099833	0.286728457	0.372811287	0.712474367	0.375263536	0.451635652	1.121700091	0.680633495	0.215704602	0.476658995	scn4ab	protein_coding	chr3:22142529-22186270:+	gi|528473825|ref|XP_005171642.1|	8480	0	PREDICTED: sodium channel protein type 4 subunit alpha B isoform X1 [Danio rerio]	gi|190339973|gb|BC163558.1|	5466	0	Danio rerio sodium channel, voltage-gated, type IV, alpha, b, mRNA (cDNA clone MGC:195116 IMAGE:9038474), complete cds	Q20JQ7	3245	0	Sodium channel protein type 4 subunit alpha B	.	.	.	.	pfam06512	Na_trans_assoc	Sodium ion transport-associated. Members of this family contain a region found exclusively in eukaryotic sodium channels or their subunits, many of which are voltage-gated. Members very often also contain between one and four copies of pfam00520 and, less often, one copy of pfam00612.	GO:0086010|membrane depolarization during action potential;GO:0019228|neuronal action potential;	GO:0005886|plasma membrane;GO:0001518|voltage-gated sodium channel complex;	GO:0005248|voltage-gated sodium channel activity;	K04837	SCN4A; voltage-gated sodium channel type IV alpha
ENSDARG00000041703	6	30.91379423	2.063191048	25.43571872	3.001076549	9.930030939	1.669866226	3.013846236	2.061969942	3.503631728	17.76689004	5.248514529	6.471223057	6.370681947	4.818020442	6.771911867	rrbp1b	protein_coding	chr22:25059297-25082243:+	gi|589269157|ref|NP_955463.2|	3264	0	ribosome-binding protein 1 [Danio rerio]	gi|589269156|ref|NM_199431.2|	3417	0	Danio rerio ribosome binding protein 1 homolog b (dog) (rrbp1b), mRNA	Q99PL5	300	2.00E-82	Ribosome-binding protein 1	.	.	.	.	pfam01576	Myosin_tail_1	Myosin tail. The myosin molecule is a multi-subunit complex made up of two heavy chains and four light chains it is a fundamental contractile protein found in all eukaryote cell types. This family consists of the coiled-coil myosin heavy chain tail region. The coiled-coil is composed of the tail from two molecules of myosin. These can then assemble into the macromolecular thick filament. The coil…	GO:0015031|protein transport;GO:0007165|signal transduction;GO:0006412|translation;	GO:0030176|integral component of endoplasmic reticulum membrane;GO:0005840|ribosome;	GO:0004872|receptor activity;	K14000	RRBP1; ribosome-binding protein 1
ENSDARG00000014101	6	17.44361675	45.68624445	28.62868676	3.670412851	4.853275277	6.753703851	7.595473521	2.917681203	5.760819418	15.38061497	14.26115891	6.779633765	8.019879462	5.092709729	5.879936099	pyroxd2	protein_coding	chr13:40158833-40190475:-	gi|371940945|ref|NP_001243145.1|	2938	0	pyridine nucleotide-disulfide oxidoreductase domain-containing protein 2 [Danio rerio]	gi|157391843|emb|CU462910.9|	2401	0	Zebrafish DNA sequence from clone CH73-123I13 in linkage group 13, complete sequence	Q3U4I7	113	7.00E-29	Pyridine nucleotide-disulfide oxidoreductase domain-containing protein 2	CC3121	374	4.00E-114	COG1233	pfam01593	Amino_oxidase	Flavin containing amine oxidoreductase. This family consists of various amine oxidases, including maze polyamine oxidase (PAO) and various flavin containing monoamine oxidases (MAO). The aligned region includes the flavin binding site of these enzymes. The family also contains phytoene dehydrogenases and related enzymes. In vertebrates MAO plays an important role regulating the intracellular leve…	.	.	GO:0016491|oxidoreductase activity;	.	.
ENSDARG00000014106	6	6.170667082	5.812944089	3.992143002	2.803858511	2.961144494	4.690972204	3.872534208	4.870217829	6.642041081	2.463188388	2.891477975	2.96026704	2.065690692	1.684071985	1.864455372	cfl2	protein_coding	chr17:9851027-9869190:-	gi|45387807|ref|NP_991263.1|	860	5.00E-106	cofilin-2 [Danio rerio]	gi|45387806|ref|NM_205700.1|	2765	0	Danio rerio cofilin 2 (muscle) (cfl2), mRNA	P21566	308	2.00E-97	Cofilin-2	.	.	.	.	pfam00241	Cofilin_ADF	Cofilin/tropomyosin-type actin-binding protein. Severs actin filaments and binds to actin monomers.	GO:0030042|actin filament depolymerization;GO:0046716|muscle cell cellular homeostasis;GO:0030836|positive regulation of actin filament depolymerization;GO:0045214|sarcomere organization;	GO:0015629|actin cytoskeleton;GO:0070062|extracellular exosome;GO:0005615|extracellular space;GO:0031674|I band;GO:0016363|nuclear matrix;GO:0005634|nucleus;	.	K05765	CFL; cofilin
ENSDARG00000027469	2	1.162406866	0.02483681	0.343206679	0.023861745	0.093875927	0.07416924	0	0	0.076060618	0.131826232	0.022916829	0	0.023312208	0.123134074	0.046645509	hsd17b1	protein_coding	chr3:17643070-17897410:-	gi|528473672|ref|XP_005163946.1|	1567	0	PREDICTED: estradiol 17-beta-dehydrogenase 1 [Danio rerio]	gi|154090138|emb|CU463849.5|	1789	0	Zebrafish DNA sequence from clone CH73-141C7 in linkage group 3, complete sequence	Q1WNP0	318	1.00E-103	Estradiol 17-beta-dehydrogenase 1	CAC3335	129	3.00E-33	COG1028	pfam00106	adh_short	short chain dehydrogenase. This family contains a wide variety of dehydrogenases.	GO:0006703|estrogen biosynthetic process;GO:0006694|steroid biosynthetic process;	GO:0005737|cytoplasm;	GO:0004303|estradiol 17-beta-dehydrogenase activity;	.	.
ENSDARG00000027391	4	3.726730046	0.210707829	5.039410712	0.860351644	1.393725172	0.734100428	0.098018222	0.054164408	0.0537729	2.795932657	0.048604827	0.052149684	0.296660363	0.313389442	0.989315251	ccnd3	protein_coding	chr22:499994-510037:-	gi|54400536|ref|NP_001006017.1|	1358	0	cyclin D3 [Danio rerio]	gi|54400535|ref|NM_001006017.1|	1198	0	Danio rerio cyclin D3 (ccnd3), mRNA	Q0P5D3	187	3.00E-54	G1/S-specific cyclin-D2	YGR108w	67.4	2.00E-11	COG5024	pfam00134	Cyclin_N	Cyclin, N-terminal domain. Cyclins regulate cyclin dependent kinases (CDKs). Human cyclin-O is a Uracil-DNA glycosylase that is related to other cyclins. Cyclins contain two domains of similar all-alpha fold, of which this family corresponds with the N-terminal domain.	GO:0007049|cell cycle;GO:0051301|cell division;GO:0045737|positive regulation of cyclin-dependent protein serine/threonine kinase activity;	GO:0000785|chromatin;GO:0000307|cyclin-dependent protein kinase holoenzyme complex;GO:0005829|cytosol;GO:0031965|nuclear membrane;GO:0005730|nucleolus;GO:0005654|nucleoplasm;	.	K10151	CCND2; cyclin D2
ENSDARG00000076913	6	9.551014382	3.459924668	9.434250073	2.408762316	5.899094265	1.073155791	1.236287758	1.366333606	1.637986477	6.068179596	2.313376275	1.737467146	2.800413169	4.698527697	5.038315483	eme1	protein_coding	chr12:21550856-21563036:-	gi|68437563|ref|XP_707096.1|	2763	0	PREDICTED: crossover junction endonuclease EME1 [Danio rerio]	gi|528496030|ref|XM_702004.4|	2483	0	PREDICTED: Danio rerio essential meiotic structure-specific endonuclease 1 (eme1), transcript variant X2, mRNA	Q5NVA9	300	1.00E-91	Crossover junction endonuclease EME1	.	.	.	.	pfam02732	ERCC4	ERCC4 domain. This domain is a family of nucleases. The family includes EME1 which is an essential component of a Holliday junction resolvase. EME1 interacts with MUS81 to form a DNA structure-specific endonuclease.	GO:0006310|DNA recombination;GO:0006281|DNA repair;GO:0072429|response to intra-S DNA damage checkpoint signaling;	GO:0005737|cytoplasm;GO:0048476|Holliday junction resolvase complex;GO:0005720|nuclear heterochromatin;GO:0005730|nucleolus;	GO:0003677|DNA binding;GO:0004519|endonuclease activity;GO:0046872|metal ion binding;	K10882	EME1, MMS4; crossover junction endonuclease EME1 [EC:3.1.22.-]
ENSDARG00000076919	4	3.813620476	2.882186366	3.033610554	1.556451066	1.12142339	2.559587857	0.920123397	1.394621798	2.567170275	2.359655802	1.842447894	1.725056666	1.290746874	1.400890926	1.406312333	igdcc4	protein_coding	chr7:31354512-31488452:-	gi|528485293|ref|XP_002662886.2|	6204	0	PREDICTED: immunoglobulin superfamily DCC subclass member 4 isoform X1 [Danio rerio]	gi|146189927|emb|CR318636.11|	3584	0	Zebrafish DNA sequence from clone DKEY-249N13 in linkage group 7, complete sequence	Q9EQS9	999	0	Immunoglobulin superfamily DCC subclass member 4	.	.	.	.	pfam07679	I-set	Immunoglobulin I-set domain.	.	GO:0005887|integral component of plasma membrane;	.	.	.
ENSDARG00000031731	6	1.047363655	0.82829573	1.281823619	1.228774529	1.645928554	2.09763236	1.552577254	1.553071746	1.541845921	2.754178828	4.709222968	3.436785081	3.018339101	3.019457693	2.024574695	si:ch73-27e22.6	protein_coding	chr22:8567115-8579915:+	gi|528515524|ref|XP_001344046.5|	1676	0	PREDICTED: uncharacterized protein LOC100004843 isoform X1 [Danio rerio]	gi|89473591|emb|CR974475.12|	4516	0	Zebrafish DNA sequence from clone CH73-27E22 in linkage group 22, complete sequence	.	.	.	.	.	.	.	.	pfam01407	Gemini_AL3	Geminivirus AL3 protein. Geminiviruses are small, ssDNA-containing plant viruses. Geminiviruses contain three ORFs (designated AL1, AL2, and AL3) that overlap and are specified by multiple polycistronic mRNAs. The AL3 protein comprises approximately 0.05% of the cellular proteins and is present in the soluble and organelle fractions. AL3 may form oligomers. Immunoprecipitation of AL3 in a baculov…	.	.	.	.	.
ENSDARG00000075172	1	9.763568281	7.922364213	12.84471028	35.77626565	63.55867858	35.77890068	7.399417446	5.578631472	7.143159034	13.08933836	8.24856497	7.263227417	8.419809449	15.13001332	11.23149155	fbxo25	protein_coding	chr23:35369920-35384286:-	gi|45387861|ref|NP_991287.1|	1916	0	F-box only protein 25 [Danio rerio]	gi|50418504|gb|BC078303.1|	1996	0	Danio rerio F-box protein 25, mRNA (cDNA clone MGC:100907 IMAGE:7144049), complete cds	Q641X7	214	7.00E-67	F-box only protein 25	.	.	.	.	pfam12319	TryThrA_C	Tryptophan-Threonine-rich plasmodium antigen C terminal. This protein is found in eukaryotes. Proteins in this family are typically between 254 to 536 amino acids in length. This family is the C terminal of a surface antigen of malarial Plasmodium species. It is currently being targeted for use as part of a subunit vaccine against Plasmodium falciparum, the main species involved in causing human …	GO:0016567|protein ubiquitination;GO:0006511|ubiquitin-dependent protein catabolic process;	GO:0005634|nucleus;GO:0019005|SCF ubiquitin ligase complex;	GO:0004842|ubiquitin-protein transferase activity;	K10305	FBXO25_32; F-box protein 25/32
ENSDARG00000042737	5	16.69345415	25.54258923	22.19989866	90.00782864	57.83083033	122.1965699	55.94633722	53.47330259	47.15124466	87.70472463	31.34194723	47.95997598	24.22526929	8.736362528	16.74249846	slc52a3	protein_coding	chr8:28433888-28442758:+	gi|94536651|ref|NP_001035447.1|	2200	0	solute carrier family 52, riboflavin transporter, member 3-A [Danio rerio]	gi|94536650|ref|NM_001040357.1|	1965	0	Danio rerio solute carrier family 52 (riboflavin transporter), member 3 (slc52a3), mRNA	B0S5Y3	847	0	Solute carrier family 52, riboflavin transporter, member 3-A	.	.	.	.	pfam06237	DUF1011	Protein of unknown function (DUF1011). Family of uncharacterized eukaryotic proteins.	.	GO:0005887|integral component of plasma membrane;	GO:0032217|riboflavin transporter activity;	K14620	RFT2; riboflavin transporter 2
ENSDARG00000007769	1	3.42157743	2.581091924	1.899412074	3.592474584	3.564611082	11.3640916	10.22122846	12.11301322	8.343506406	18.79311076	25.49494418	19.91789566	8.758819382	7.480939572	9.508550641	sult5a1	protein_coding	chr7:56128616-56305341:-	gi|115494968|ref|NP_001070124.1|	1667	0	sulfotransferase family 5A, member 1 [Danio rerio]	gi|115494967|ref|NM_001076656.1|	1932	0	Danio rerio sulfotransferase family 5A, member 1 (sult5a1), mRNA	O35400	271	3.00E-86	Sulfotransferase family cytosolic 2B member 1	.	.	.	.	pfam00685	Sulfotransfer_1	Sulfotransferase domain.	GO:0008202|steroid metabolic process;GO:0000103|sulfate assimilation;	GO:0005737|cytoplasm;GO:0005783|endoplasmic reticulum;GO:0070062|extracellular exosome;GO:0043231|intracellular membrane-bounded organelle;	GO:0004027|alcohol sulfotransferase activity;GO:0050294|steroid sulfotransferase activity;GO:0008146|sulfotransferase activity;	K01015	SULT2B1; alcohol sulfotransferase [EC:2.8.2.2]
ENSDARG00000017901	4	1.307692995	0.483271701	0.891836919	0.122523349	0.405917032	0.146990176	0.206076728	0.400295019	0.30832885	0.826519073	0.501652069	0.578108195	0.466206346	0.512462421	1.008469758	tln2a	protein_coding	chr7:29592391-29674894:+	gi|688564281|ref|XP_009301497.1|	12362	0	PREDICTED: talin-2 isoform X1 [Danio rerio]	gi|336391128|ref|NM_201193.2|	7786	0	Danio rerio talin 2a (tln2a), mRNA	Q9Y4G6	4167	0	Talin-2	.	.	.	.	pfam09141	Talin_middle	Talin, middle domain. Members of this family adopt a structure consisting of five alpha helices that fold into a bundle. They contain a Vinculin binding site (VBS) composed of a hydrophobic surface spanning five turns of helix four. Activation of the VBS causes subsequent recruitment of Vinculin, which enables maturation of small integrin/talin complexes into more stable adhesions. Formation of t…	GO:0007155|cell adhesion;GO:0007043|cell-cell junction assembly;GO:0007016|cytoskeletal anchoring at plasma membrane;	GO:0015629|actin cytoskeleton;GO:0005911|cell-cell junction;GO:0005737|cytoplasm;GO:0005925|focal adhesion;GO:0005886|plasma membrane;GO:0001726|ruffle;GO:0045202|synapse;	GO:0003779|actin binding;GO:0005200|structural constituent of cytoskeleton;GO:0005198|structural molecule activity;	K06271	TLN; talin
ENSDARG00000042732	1	13.72931318	15.86529033	14.05031516	30.04108572	19.57462937	29.74605098	22.85992955	22.88974529	24.90060411	25.46046644	21.80253171	23.81476136	21.21149454	15.94254218	17.33389417	tmem189	protein_coding	chr8:28419437-28431291:+	gi|169154361|emb|CAQ14264.1|	1454	0	novel protein (zgc:101801) [Danio rerio]	gi|51890176|emb|BX322655.10|	2582	0	Zebrafish DNA sequence from clone DKEYP-53E12 in linkage group 8 Contains the ptp1b gene for protein tyrosine phosphatase 1b, the klhl12 gene for kelch-like 12 (Drosophila), the adipor1b gene for adiponectin receptor 1b, the tuba8l gene for tubulin alpha 8 like, the gene for a novel protein (zgc:101801), the cebpb gene for CCAAT/enhancer binding protein (C/EBP) beta, the 5' end of the gene for a …	A5PLL7	389	8.00E-124	Transmembrane protein 189	.	.	.	.	pfam10520	Kua-UEV1_localn	Kua-ubiquitin conjugating enzyme hybrid localisation domain. This domain is part of the transcript of the fusion of two genes, the UEV1, an enzymatically inactive variant of the E2 ubiquitin-conjugating enzymes that regulate non-canonical elongation of ubiquitin chains, and Kua, an otherwise unknown gene. UEV1A is a nuclear protein, whereas both Kua and Kua-UEV localize to cytoplasmic structures,…	.	GO:0005737|cytoplasm;GO:0005789|endoplasmic reticulum membrane;GO:0016021|integral component of membrane;	GO:0061630|ubiquitin protein ligase activity;GO:0031625|ubiquitin protein ligase binding;	.	.
ENSDARG00000071667	4	1.051515077	0.54497889	0.289645142	0.309390335	1.100153512	0.3452167	0.161328532	0.916965136	1.239070052	0.894070856	1.097127137	2.305238463	5.859291882	4.372093408	0.628065288	si:dkey-222f2.7	protein_coding	chr22:5828574-5846231:+	gi|688607967|ref|XP_009294307.1|	1241	1.00E-161	PREDICTED: uncharacterized protein LOC100001452 [Danio rerio]	gi|134054355|emb|CU458911.1|	959	0	Danio rerio cDNA, clone cssl:d0141	.	.	.	.	.	.	.	.	pfam11465	Receptor_2B4	Natural killer cell receptor 2B4. 2B4 is a transmembrane receptor which is expressed primarily on natural killer cells. It plays a role in activating NK-mediated cytotoxicity through its interaction with CD48 on target cells in a subset of CD8 T cells. The structure of 2B4 consists of an immunoglobulin variable domain fold and contains two beta-sheets. One of the beta-sheets, the six-stranded she…	.	.	.	.	.
ENSDARG00000007760	1	23.35719041	19.76565228	24.81190457	44.89701839	42.77946656	46.37712435	27.27759327	23.08200673	33.24380576	26.926918	24.36034544	25.62450912	29.90460858	29.81776922	26.64791293	spg21	protein_coding	chr7:13373209-13395853:-	gi|50540538|ref|NP_998560.1|	1621	0	maspardin [Danio rerio]	gi|50540537|ref|NM_213395.1|	1337	0	Danio rerio spastic paraplegia 21 (autosomal recessive, Mast syndrome) (spg21), mRNA	Q6PC62	612	0	Maspardin	.	.	.	.	pfam12697	Abhydrolase_6	Alpha/beta hydrolase family. This family contains alpha/beta hydrolase enzymes of diverse specificity.	.	GO:0005829|cytosol;GO:0030140|trans-Golgi network transport vesicle;	GO:0042609|CD4 receptor binding;	K19367	SPG21; maspardin
ENSDARG00000006544	4	0.35944751	0.990747159	0.965363424	0.555246745	0.624122744	0.657473629	1.229016503	2.461914189	3.286918818	5.170941487	3.961353998	7.029283274	1.31740135	6.057950771	0.310117025	CABZ01084570.1	protein_coding	chr6:197608-200850:-	gi|528481311|ref|XP_699453.4|	935	2.00E-124	PREDICTED: complement C1q tumor necrosis factor-related protein 6-like [Danio rerio]	gi|551522589|ref|XM_005812726.1|	175	5.00E-85	PREDICTED: Xiphophorus maculatus complement C1q tumor necrosis factor-related protein 1-like (LOC102221508), mRNA	P60827	214	1.00E-66	Complement C1q tumor necrosis factor-related protein 8	.	.	.	.	pfam00386	C1q	C1q domain. C1q is a subunit of the C1 enzyme complex that activates the serum complement system.	.	GO:0005581|collagen trimer;GO:0005576|extracellular region;	.	.	.
ENSDARG00000016538	2	16.65064921	0	19.66533299	0.309887188	7.053629378	0.022933797	0	0.118449306	0	9.709474445	0.02125827	0	2.703129177	1.987471351	3.418301056	zgc:55888	protein_coding	chr4:9466133-9475502:+	gi|319738594|ref|NP_956439.2|	2998	0	ovochymase-1 precursor [Danio rerio]	gi|319738593|ref|NM_200145.2|	1785	0	Danio rerio zgc:55888 (zgc:55888), mRNA	Q29485	60.8	5.00E-09	Plasminogen	VC1649	119	3.00E-27	COG5640	pfam00089	Trypsin	Trypsin.	GO:0007596|blood coagulation;GO:0042730|fibrinolysis;GO:0048771|tissue remodeling;	GO:0005576|extracellular region;	GO:0004252|serine-type endopeptidase activity;	K09640	TMPRSS9; transmembrane protease, serine 9 [EC:3.4.21.-]
ENSDARG00000011573	1	34.81463658	51.02226478	22.29023619	20.87284582	12.01979627	20.70819338	33.81153627	16.99152895	47.4808468	25.61924615	24.82146675	6.772073878	10.79725493	6.770006181	7.169348859	abcb11a	protein_coding	chr9:49054562-49119634:+	gi|688572512|ref|XP_009303249.1|	6367	0	PREDICTED: bile salt export pump [Danio rerio]	gi|597438732|emb|CR626882.8|	1291	0	Zebrafish DNA sequence from clone CH211-278B7 in linkage group 9, complete sequence	O95342	1743	0	Bile salt export pump	SPCC663.03	416	5.00E-121	COG1132	pfam00664	ABC_membrane	ABC transporter transmembrane region. This family represents a unit of six transmembrane helices. Many members of the ABC transporter family (pfam00005) have two such regions.	GO:0015721|bile acid and bile salt transport;GO:0006699|bile acid biosynthetic process;GO:0015722|canalicular bile acid transport;GO:0006810|transport;	GO:0045177|apical part of cell;GO:0070062|extracellular exosome;GO:0005887|integral component of plasma membrane;GO:0046581|intercellular canaliculus;GO:0016020|membrane;GO:0005886|plasma membrane;	GO:0005524|ATP binding;GO:0015432|bile acid-exporting ATPase activity;GO:0015126|canalicular bile acid transmembrane transporter activity;GO:0008554|sodium-exporting ATPase activity, phosphorylative mechanism;GO:0005215|transporter activity;	K05664	ABCB11; ATP-binding cassette, subfamily B (MDR/TAP), member 11
ENSDARG00000104205	3	0.345974865	1.198128442	0.493829994	0.070474977	0.023104987	0.146037809	0.045498118	0.100568185	1.297936432	0.415301312	0	0.096827405	0.459012895	0.048489725	0.091844112	cfhl3	protein_coding	chr22:23741591-23754556:-	gi|688609406|ref|XP_009294637.1|	3402	0	PREDICTED: complement factor H like 3 isoform X1 [Danio rerio]	gi|312836778|ref|NM_001199191.1|	2016	0	Danio rerio complement factor H like 3 (cfhl3), mRNA	Q28085	85.1	1.00E-15	Complement factor H	.	.	.	.	pfam00084	Sushi	Sushi domain (SCR repeat).	GO:0006957|complement activation, alternative pathway;	GO:0005576|extracellular region;	.	K04004	HF1; complement factor H
ENSDARG00000044775	1	5.765538053	7.530325957	9.218893746	7.284588442	8.14614795	8.271276081	11.01632557	12.97613546	10.76179196	15.87721344	19.02370053	23.18746757	14.42862935	14.31538391	10.19239127	fut7	protein_coding	chr21:13580161-13584718:+	gi|82658258|ref|NP_001032467.1|	1888	0	alpha-1,3-fucosyltransferase [Danio rerio]	gi|402745760|ref|NM_001037390.3|	1269	0	Danio rerio fucosyltransferase 7 (alpha (1,3) fucosyltransferase) (fut7), mRNA	Q11131	258	8.00E-80	Alpha-(1,3)-fucosyltransferase 7	.	.	.	.	pfam00852	Glyco_transf_10	Glycosyltransferase family 10 (fucosyltransferase). This family of Fucosyltransferases are the enzymes transferring fucose from GDP-Fucose to GlcNAc in an alpha1,3 linkage. This family is know as glycosyltransferase family 10.	GO:0002361|CD4-positive, CD25-positive, alpha-beta regulatory T cell differentiation;GO:0002522|leukocyte migration involved in immune response;GO:0006486|protein glycosylation;	GO:0032580|Golgi cisterna membrane;GO:0016021|integral component of membrane;GO:0016020|membrane;	GO:0008417|fucosyltransferase activity;	K07635	FUT7; galactoside alpha-1,3-fucosyltransferase 7 [EC:2.4.1.-]
ENSDARG00000044774	4	6.694637279	0.240684336	10.74517969	0.565241955	4.649664025	1.118050369	0.39809016	0.274978438	0.327589026	5.422189691	1.135067973	2.515127046	1.430763217	1.617512267	1.506747904	pou5f3	protein_coding	chr21:13589124-13593983:-	gi|18859249|ref|NP_571187.1|	1952	0	POU domain, class 5, transcription factor 1 [Danio rerio]	gi|29179579|gb|BC049295.1|	2399	0	Danio rerio POU domain, class 5, transcription factor 1, mRNA (cDNA clone MGC:55202 IMAGE:5612252), complete cds	Q90270	752	0	POU domain, class 5, transcription factor 1	.	.	.	.	pfam00157	Pou	Pou domain - N-terminal to homeobox domain.	GO:0009653|anatomical structure morphogenesis;GO:0007420|brain development;GO:0035284|brain segmentation;GO:0009953|dorsal/ventral pattern formation;GO:0007398|ectoderm development;GO:0009880|embryonic pattern specification;GO:0001706|endoderm formation;GO:0090504|epiboly;GO:0055113|epiboly involved in gastrulation with mouth forming second;GO:0031101|fin regeneration;GO:0030902|hindbrain develop…	GO:0005634|nucleus;	GO:0003682|chromatin binding;GO:0046982|protein heterodimerization activity;GO:0043565|sequence-specific DNA binding;GO:0003700|transcription factor activity, sequence-specific DNA binding;	K09369	POU7F; POU domain transcription factor, class 7
ENSDARG00000103520	4	0.699216327	1.789592842	0.975520022	0.529026302	0.260159273	0.685153132	1.024606274	1.557029678	2.623133749	0.974216867	1.524231204	1.544541381	0.689123726	0.59148728	0.51707662	si:dkey-148a17.5	protein_coding	chr7:34515114-34516556:+	gi|688564955|ref|XP_005169065.2|	1527	0	PREDICTED: uncharacterized protein LOC100535037 [Danio rerio]	gi|38174947|emb|BX005082.7|	1443	0	Zebrafish DNA sequence from clone DKEY-148A17 in linkage group 7, complete sequence	Q3T181	119	2.00E-28	Leukotriene B4 receptor 1	.	.	.	.	pfam00001	7tm_1	7 transmembrane receptor (rhodopsin family). This family contains, amongst other G-protein-coupled receptors (GCPRs), members of the opsin family, which have been considered to be typical members of the rhodopsin superfamily. They share several motifs, mainly the seven transmembrane helices, GCPRs of the rhodopsin superfamily. All opsins bind a chromophore, such as 11-cis-retinal. The function of…	GO:0006954|inflammatory response;GO:0007218|neuropeptide signaling pathway;GO:0007200|phospholipase C-activating G-protein coupled receptor signaling pathway;	GO:0005887|integral component of plasma membrane;	GO:0008528|G-protein coupled peptide receptor activity;GO:0001632|leukotriene B4 receptor activity;	K04296	LTB4R1; leukotriene B4 receptor 1
ENSDARG00000103521	1	11.19593938	12.53451447	10.35481384	18.65266732	15.70644694	11.66339278	21.54888247	24.93635746	21.00097303	23.35760111	31.36526487	18.34381245	34.84767345	21.14201911	26.93120693	capsla	protein_coding	chr2:54218470-54224926:+	gi|688539599|ref|XP_009297198.1|	994	4.00E-133	PREDICTED: calcyphosine-like a isoform X1 [Danio rerio]	gi|62955328|ref|NM_001017676.1|	950	0	Danio rerio calcyphosine-like a (capsla), mRNA	Q6P8Y1	265	1.00E-86	Calcyphosin-like protein	SPAC3A12.14	49.7	1.00E-06	COG5126	pfam13499	EF-hand_7	EF-hand domain pair.	.	GO:0005737|cytoplasm;	GO:0005509|calcium ion binding;	.	.
ENSDARG00000089066	4	3.022671215	2.867166943	2.539734392	1.237576276	0.739485249	1.240886061	1.565723449	1.345884426	2.382458376	2.389307371	1.955387285	1.247828878	1.358584073	1.46953131	1.77541267	nhsl2	protein_coding	chr7:51192752-51351949:-	gi|528485898|ref|XP_001334053.3|	5529	0	PREDICTED: NHS-like protein 2 isoform X3 [Danio rerio]	gi|106880439|emb|CR318655.9|	5208	0	Zebrafish DNA sequence from clone DKEY-29B6 in linkage group 7, complete sequence	B1AXH1	157	1.00E-37	NHS-like protein 2	.	.	.	.	pfam15273	NHS	NHS-like. This family of proteins includes Nance-Horan syndrome protein (NHS).	GO:0072358|cardiovascular system development;GO:0001822|kidney development;GO:0009791|post-embryonic development;GO:0010107|potassium ion import;GO:1900128|regulation of G-protein activated inward rectifier potassium channel activity;GO:0070294|renal sodium ion absorption;GO:0001894|tissue homeostasis;	GO:0005887|integral component of plasma membrane;	GO:0005524|ATP binding;GO:0015272|ATP-activated inward rectifier potassium channel activity;GO:0005546|phosphatidylinositol-4,5-bisphosphate binding;	.	.
ENSDARG00000089310	4	6.661485499	2.423499487	2.445093734	1.578546223	2.290031016	1.635526831	2.445834332	1.816154118	1.048271335	1.656954333	1.061225489	1.097957903	1.272308573	1.506971625	2.31433487	gc	protein_coding	chr5:45077668-45124680:+	gi|50540202|ref|NP_001002568.1|	2218	0	vitamin D-binding protein precursor [Danio rerio]	gi|50540201|ref|NM_001002568.1|	1521	0	Danio rerio group-specific component (vitamin D binding protein) (gc), mRNA	P02774	203	2.00E-58	Vitamin D-binding protein	.	.	.	.	pfam00273	Serum_albumin	Serum albumin family.	GO:0042359|vitamin D metabolic process;GO:0051180|vitamin transport;	GO:0072562|blood microparticle;GO:0005829|cytosol;GO:0070062|extracellular exosome;GO:0005576|extracellular region;GO:0005615|extracellular space;GO:0043202|lysosomal lumen;	GO:0003779|actin binding;GO:1902118|calcidiol binding;GO:0005499|vitamin D binding;GO:0051183|vitamin transporter activity;	K12258	GC; vitamin D-binding protein
ENSDARG00000043175	2	0.834439541	0.161401426	0.128672339	1.434351171	0.610050506	0.040165589	0	1.950017724	0.24713907	0	0	0	0.151493836	0.080018389	0.189452966	CELA1	protein_coding	chr22:7409685-7446499:+	gi|528515442|ref|XP_005161725.1|	1511	0	PREDICTED: ela1 protein isoform X1 [Danio rerio]	gi|528515441|ref|XM_005161668.1|	1225	0	PREDICTED: Danio rerio zgc:112368 (zgc:112368), transcript variant X1, mRNA	Q7SIG3	317	9.00E-107	Elastase-1	VC1649	85.1	4.00E-17	COG5640	pfam00089	Trypsin	Trypsin.	.	GO:0005576|extracellular region;	GO:0046872|metal ion binding;GO:0004252|serine-type endopeptidase activity;	.	.
[truncated: 5,321 more rows]
