# Supplementary material for: Renal interstitial cells promote nephron regeneration by secreting prostaglandin E2
Source: eLife. 2023 Jan 16;12:e81438. doi: 10.7554/eLife.81438 (PMC9943066; doi:10.7554/eLife.81438)
Supplement: Figure 3—source data 3. [file elife-81438-fig3-data3.xlsx]

## Sheet: Figure 3C
PGE2 LEVEL	sample	0	1	3	5	7	9	dpi
	1	10.2749	18.0739	25.2375	25.5557	17.8545	19.0068
	2	10.1192	18.107	24.606	23.8765	16.6569	23.812
	3	10.3166	15.9587	21.1757	27.0945	30.0828	17.6052
	mean	10.2369	17.3798	23.6731	25.5089	21.5314	20.1414
	SD	0.0849301	1.00502	1.78462	1.31415	6.06648	2.65786

## Sheet: Figure 3P
		Un-Inj	DMSO	Indo	NS398	cox2a(-/-)	cox2a(-/-)+ dmPGE2	GW627368X	GW627368X+dmPGE2	dmPGE2
		0	34	3	3	1	33	2	2	63
		0	31	5	5	1	34	1	1	59
		0	27	1	2	0	36	2	1	70
		0	31	0	0	0	41	0	1	66
		0	33	0	1	0	24	0	0	65
				0	0	0	31	0	0	65
	mean	0	31.2	1.5	1.83333	0.333333	33.1667	0.833333	0.833333	64.6667
	SD	0	2.68328	2.07364	1.94079	0.516398	5.63619	0.983192	0.752773	3.61478

## Sheet: Figure 3—figure supplement 1D
	cox1 mRNA level	0 dpi				mean	SD
		0.75837	1.31862	0.923012		1	0.287949
		1 dpi
		0.674477	1.67281	0.839318		1.0622	0.535187
		3 dpi
		0.367635	0.847546	0.45942		0.5582	0.254749
		5 dpi
		0.918538	1.13367	1.00914		1.02045	0.108013
		7 dpi
		0.52922	1.84648	0.589895		0.988532	0.743624
		9 dpi
		0.82896	0.81896			0.82396	0.00707107

## Sheet: Figure 3—figure supplement 1E
	cox2b mRNA level	0 dpi					mean	SD
			0.576661	1.73412	0.689218		1	0.638253
		1 dpi
			0.129743	0.350713	0.159484		0.213313	0.119917
		3 dpi
			0.053552	0.462449	0		0.172	0.252957
		5 dpi
			0.164946	0.455948	0.201822		0.274239	0.158441
		7 dpi
			0.155172	0.346378	0.19396		0.231837	0.101074
		9 dpi
			0.090419	0.115967	0.100812		0.102399	0.0128478

## Sheet: Figure 3—figure supplement 1F
								means	SD
			Con	11.9867	9.7819	10.2091		10.6592	0.954728
			5 dpi	33.0612	25.4468	25.6388		28.0489	3.54509
			Con	16.2454	9.28396	10.9182		12.1492	2.97231
			5 dpi	9.89277	10.7412	11.4574		10.6971	0.639512
