# Supplementary material for: Renal interstitial cells promote nephron regeneration by secreting prostaglandin E2
Source: eLife. 2023 Jan 16;12:e81438. doi: 10.7554/eLife.81438 (PMC9943066; doi:10.7554/eLife.81438)
Supplement: Figure 4—source data 1. [file elife-81438-fig4-data1.xlsx]

## Sheet: Figure 4K
					wild type			cox2a(-/-)			cox2a(-/-), dmPGE2			GW627368X			GW627368X+dmPGE2
					lhx1a+	lhx1a+, EdU+	lhx1a+, EdU+/lhx1a+ (%)	lhx1a+	lhx1a+, EdU+	lhx1a+, EdU+/lhx1a+ (%)	lhx1a+	lhx1a+, EdU+	lhx1a+, EdU+/lhx1a+ (%)	lhx1a+	lhx1a+, EdU+	lhx1a+, EdU+/lhx1a+ (%)	lhx1a+	lhx1a+, EdU+	lhx1a+, EdU+/lhx1a+ (%)
					118	37	31.3559	41	2	4.87805	230	130	56.5217	53	1	1.88679	68	7	10.2941
					193	75	38.8601	81	10	12.3457	198	105	53.0303	67	3	4.47761	76	5	6.57895
					174	82	47.1264	53	3	5.66038	196	93	47.449	43	5	11.6279	76	3	3.94737
					154	63	40.9091	93	5	5.37634	151	96	63.5762	68	8	11.7647	90	8	8.88889
					143	59	41.2587	82	17	20.7317	173	92	53.1792	53	9	16.9811	54	4	7.40741
								81	9	11.1111	178	74	41.573	84	9	10.7143	45	3	6.66667
				means	156.4	63.2	39.9021	71.8333	7.66667	10.0172	187.667	98.3333	52.5549	61.3333	5.83333	9.57541	68.1667	5	7.29723
				SD	28.7628	17.2974	5.68261	20.1238	5.57375	6.13758	26.9122	18.5113	7.5431	14.5968	3.37145	5.48179	16.3514	2.09762	2.17541

## Sheet: Figure 4—figure supplement 1A
			Aggregation	Proliferation
			15.3846	49.2064
			0	47.6191
			0	30.9091
			13.3333	43.75
			0	37.2549
			7.14286	47.1698
			8.33333	35.5556
			0	56.7568
		mean	5.52427	43.5277
		sd	6.02898	7.90127

## Sheet: Figure 4—figure supplement 2G
		wild type			NS398			Indo
		lhx1a+	lhx1a+, EdU+	lhx1a+, EdU+/lhx1a+ (%)	lhx1a+	lhx1a+, EdU+	lhx1a+, EdU+/lhx1a+ (%)	lhx1a+	lhx1a+, EdU+	lhx1a+, EdU+/lhx1a+ (%)
		219	92	42.0091	20	2	10	34	2	5.88235
		231	85	36.7965	43	3	6.97674	31	5	16.129
		171	81	47.3684	32	5	15.625	37	4	10.8108
		163	57	34.9693	61	10	16.3934	35	4	11.4286
		143	53	37.0629	44	7	15.9091	71	10	14.0845
					21	1	4.7619	43	3	6.97674
	means	185.4	73.6	39.6413	36.8333	4.66667	11.611	41.8333	4.66667	10.8853
	SD	37.7995	17.4871	5.04686	15.6897	3.38625	5.06832	14.838	2.80476	3.95825

## Sheet: Figure 4—figure supplement 3A
		ep1a				mean	SD
		0.000516142	0.204779	0.12984		0.111712	0.103331
		ep2a
		0.532952	0.429358	0.32101		0.427773	0.10598
		ep3a
		0.211227	0.230324			0.220775	0.0135032
		ep4a
		0.0489219	0.104709	0.0768108		0.0768137	0.0278934
		ep4b
		0.818702	1.1813			1	0.256394
