# Supplementary material for: Renal interstitial cells promote nephron regeneration by secreting prostaglandin E2
Source: eLife. 2023 Jan 16;12:e81438. doi: 10.7554/eLife.81438 (PMC9943066; doi:10.7554/eLife.81438)
Supplement: Figure 5—source data 2. [file elife-81438-fig5-data2.xlsx]

## Sheet: Figure 5A
	lef1	Un-Inj	DMSO	cox2a（-/-） +DMSO	cox2a（-/-） +dmPGE2
	1	0.975466	13.6891	0.882079	20.4123
	2	0.818197	14.3665	1.20419	14.9604
	3	1.20634	13.7567	0.940451	10.4669
	mean	1	13.9374	1.00891	15.2798
	SD	0.195229	0.373086	0.171622	4.98039

## Sheet: Figure 5I
	Un-Inj	DMSO	wnt4a(-/-)+DMSO	wnt4a(-/-)+dmPGE2
	0	25	4	32
	0	29	5	31
	0	33	2	34
	0	33	0	26
	0	29	1	31
	0	27	0	27
mean	0	29.3333	2	30.1667
SD	0	3.20416	2.09762	3.0605

## Sheet: Figure 5P
			wild type			wnt4a(-/-)			wnt4a(-/-)，dmPGE2
			lhx1a+	lhx1a+, EdU+	lhx1a+, EdU+/lhx1a+ (%)	lhx1a+	lhx1a+, EdU+	lhx1a+, EdU+/lhx1a+ (%)	lhx1a+	lhx1a+, EdU+	lhx1a+, EdU+/lhx1a+ (%)
			195	97	49.7436	10	0	0	126	45	35.7143
			120	56	46.6667	26	1	3.84615	138	38	27.5362
			194	103	53.0928	34	4	11.7647	150	64	42.6667
			114	42	36.8421	57	8	14.0351	172	67	38.9535
			173	65	37.5723	46	5	10.8696	131	63	48.0916
			163	75	46.0123	80	6	7.5	163	72	44.1718
						65	3	4.61538	141	59	41.844
		means	159.833	73	44.9883	45.4286	3.85714	7.5187	145.857	58.2857	39.854
		SD	35.4255	23.639	6.53482	24.6123	3.03315	5.29781	18.2611	13.4672	7.25848

## Sheet: Figure 5—figure supplement 1A
		Un-inj	DMSO	Indo	NS398	dmPGE2	GW627368X	GW627368X+dmPGE2
		0.975466	13.6891	6.59901	7.9062	41.6893	0.627855	2.42003
		0.818197	14.3665	7.68821	7.91665	35.712	1.20381	2.09021
		1.20634	13.7567	6.94206	4.85305	31.0587	0.985938	1.51731
	mean	1	13.9374	7.07643	6.89197	36.1534	0.939201	2.00919
	SD	0.159404	0.304624	0.454699	1.44174	4.35111	0.237443	0.372961
