# Supplementary material for: Renal interstitial cells promote nephron regeneration by secreting prostaglandin E2
Source: eLife. 2023 Jan 16;12:e81438. doi: 10.7554/eLife.81438 (PMC9943066; doi:10.7554/eLife.81438)
Supplement: Figure 6—source data 2. [file elife-81438-fig6-data2.xlsx]

## Sheet: Figure 6L
	Un-Inj	DMSO	XAV939	XAV939+dmPGE2	ICRT 14	ICRT 14 dmPGE2	ICG 001	ICG 001 dmPGE2
	0	26	1	32	5	3	1	0
	1	31	0	31	2	1	2	5
	0	28	4	34	2	2	1	1
	0	36	2	31	0	0	4	0
	0	24	5	31	0	1	0	1
	2	29	2	25	1	0	0	1
	0	23			5	3	5	2
means	0.428571	28.1429	2.33333	30.6667	2.14286	1.42857	1.85714	1.42857
SD	0.728431	4.12063	1.69967	2.74874	1.95876	1.17803	1.80702	1.59079

## Sheet: Figure 6W
					WT, DMSO (Ag)	WT, DMSO (Pr)	cox2a-/-	cox2a-/-, dmPGE2 (Ag)	cox2a-/-, dmPGE2 (Pr)	wnt4a-/-	wnt4a-/-, dmPGE2 (Ag)	wnt4a-/-, dmPGE2 (Pr)	PKI	PKI+dmPGE2
					1.17263	1.12843	0.235838	0.980258	1.42595	0.0608709	0.932862	1.33018	0.0654741	0.0259188
					1.08644	1.22898	0.386081	0.97841	1.30656	0.172133	0.893014	1.16891	0.000651881	0.0166677
					0.995472	1.23897	0.194415	0.870413	1.09883	0.112664	0.956403	1.11895	0.124596	0.0258211
					0.745456	1.14793			1.05609			1.07622

## Sheet: Figure 6—figure supplement 1H
						WT, DMSO (Ag)	WT, DMSO (Pr)	Indo	NS-398	GW627368X	H89	H89+dmPGE2
						0.659678	1.26441	0.047333	0.067773	0.052608	0.041329	0.053029
						0.994055	1.19057	0.048596	0.032365	0.042101	0.092099	0.038481
						1.24806	0.962364	0.092422	0.016063	0.130693	0.052889	0.069401
						1.09821

## Sheet: Figure 6—figure supplement 2F
							WT, DMSO	cox2a-/-, DMSO	cox2a-/-, dmPGE2	wnt4a-/-, DMSO	wnt4a-/-, dmPGE2
							0.871267	0.107929	0.636928	0.0685861	0.780443
							1.13723	0.000420305	1.22184	0.137567	0.891709
							0.88087	0.0520159	0.960473	0.0762281	1.14089
							1.08454	0.0205567	0.796529	0.0238046	0.748856
							1.02609	0.109203	0.89376	0.0334588	1.25206

## Sheet: Figure 6—figure supplement 3I
					WT, DMSO (Ag)	WT, DMSO (Pr)	cox2a-/-	cox2a-/-, dmPGE2 (Ag)	cox2a-/-, dmPGE2 (Pr)	wnt4a-/-	wnt4a-/-, dmPGE2 (Ag)	wnt4a-/-, dmPGE2 (Pr)
					1.06542	0.873781	0.0365142	1.0522	1.0718	0.048098	1.06747	0.934638
					0.944375	1.12107	0.0153612	0.88037	0.904545	0.025728	1.30725	0.971992
					0.990207	1.06206	0.0355909	1.00658	1.06705	0.063627	1.09635	1.22033
