# Supplementary material for: Renal interstitial cells promote nephron regeneration by secreting prostaglandin E2
Source: eLife. 2023 Jan 16;12:e81438. doi: 10.7554/eLife.81438 (PMC9943066; doi:10.7554/eLife.81438)
Supplement: Figure 7—source data 2. [file elife-81438-fig7-data2.xlsx]

## Sheet: Figure 7I
			Un-Inj	DMSO	PKI (6-26)	PKI (6-26)+dmPGE2	H89	H89+dmPGE2
			0	30	0	0	1	2
			0	27	0	0	2	0
			1	29	5	3	2	0
			2	31	3	3	1	1
			0	36	3	2	4	0
			1	30	0	2	0	3
			0	25	1	0	0	5
		mean	0.571429	29.7143	1.71429	1.42857	1.42857	1.57143
		SD	0.728431	3.19438	1.82946	1.29363	1.29363	1.76126

## Sheet: Figure 7Y
			WT, DMSO (Ag)	WT, DMSO (Pr)	cox2a-/-, DMSO	cox2a-/-, dmPGE2 (Ag)	cox2a-/-, dmPGE2 (Pr)	PKI	PKI+dmPGE2
			0.835161	1.46093	0.185173	1.04106	1.14743	0.0441311	0.0755074
			0.713592	1.59739	0.230156	0.87229	1.38871	0.11152	0.128892
			1.22224	1.44344	0.206027	0.898614	1.61682	0.0423712	0.0819227
			1.22901	0.982353	0.186289	0.737115		0.113337	0.0583432

## Sheet: Figure 7X
				WT, DMSO (Ag)	WT, DMSO (Pr)	cox2a-/-, DMSO	cox2a-/-, dmPGE2 (Ag)	cox2a-/-, dmPGE2 (Pr)	PKI	PKI+dmPGE2
				1.0805	1.1174	0.16199	0.95498	1.01927	0.356683	0.216226
				0.912826	1.1092	0.173072	0.851994	0.955608	0.176185	0.306474
				1.00667	1.18411	0.266205	0.646877	0.686919	0.402435	0.428967
								1.27585
